# Supplementary material for: Altered gene expression changes in Arabidopsis leaf tissues and protoplasts in response to Plum pox virus infection
Source: PubMed Central journal article supplement (PMC2478689; doi:10.1186/1471-2164-9-325), 2008-07-09
Supplement: 1471-2164-9-325-S1.pdf [file 1471-2164-9-325-S1.pdf]

**Supplemental Table 1.** Expression levels of genes induced in PPV-infected *Arabidopsis* leaf tissues 17 days post inoculation

| Probe set IDs <sup>a</sup>            | AGI <sup>b</sup> locus | Annotation                                                               | <i>q</i> -value <sup>c</sup> | <i>p</i> -value <sup>d</sup> | Fold change <sup>e</sup> |
|---------------------------------------|------------------------|--------------------------------------------------------------------------|------------------------------|------------------------------|--------------------------|
| A. Defence and virulence <sup>f</sup> |                        |                                                                          |                              |                              |                          |
| 260352_at                             | At1g69295              | β-1,3-Glucanase-Related                                                  | 0.0309                       | 0.0386                       | 5.65                     |
| 259517_at                             | At1g20630              | Catalase 1                                                               | 0.0004                       | 0.0050                       | 2.93                     |
| 253174_at                             | At4g35090              | Catalase 2                                                               | 0.0030                       | 0.0126                       | 3.56                     |
| 263692_at                             | At1g26850              | Dehydration-Responsive Family Protein                                    | 0.0083                       | 0.0199                       | 4.64                     |
| 263774_at                             | At2g40280              | Dehydration-Responsive Family Protein                                    | 0.0029                       | 0.0123                       | 2.54                     |
| 255637_at                             | At4g00750              | Dehydration-Responsive Family Protein                                    | 0.0075                       | 0.0189                       | 2.58                     |
| 254972_at                             | At4g10440              | Dehydration-Responsive Family Protein                                    | 0.0000                       | 0.0010                       | 3.74                     |
| 246288_at                             | At1g31850              | Dehydration-Responsive Protein, Putative                                 | 0.0001                       | 0.0025                       | 6.15                     |
| 259771_at                             | At1g29470              | Dehydration-Responsive Protein-Related                                   | 0.0038                       | 0.0141                       | 3.44                     |
| 255638_at                             | At4g00740              | Dehydration-Responsive Protein-Related                                   | 0.0062                       | 0.0174                       | 3.46                     |
| 247316_at                             | At5g64030              | Dehydration-Responsive Protein-Related                                   | 0.0077                       | 0.0193                       | 5.04                     |
| 247095_at                             | At5g66400              | Dehydrin (Rab18)                                                         | 0.0274                       | 0.0363                       | 5.14                     |
| 263753_at                             | At2g21490              | Dehydrin Family Protein                                                  | 0.0004                       | 0.0048                       | 6.45                     |
| 249832_at                             | At5g23400              | Disease Resistance Family Protein / Lrr Family Protein                   | 0.0031                       | 0.0129                       | 3.18                     |
| 245839_at                             | At1g58390              | Disease Resistance Protein (CC-NBS-LRR Class), Putative                  | 0.0014                       | 0.0087                       | 15.53                    |
| 245838_at                             | At1g58410              | Disease Resistance Protein (CC-NBS-LRR Class), Putative                  | 0.0206                       | 0.0315                       | 3.41                     |
| 264885_s_at                           | At1g61180              | Disease Resistance Protein (CC-NBS-LRR Class), Putative                  | 0.0051                       | 0.0160                       | 2.87                     |
| 250829_at                             | At5g04720              | Disease Resistance Protein (CC-NBS-LRR Class), Putative                  | 0.0295                       | 0.0378                       | 3.09                     |
| 250771_at                             | At5g05400              | Disease Resistance Protein (CC-NBS-LRR Class), Putative                  | 0.0150                       | 0.0269                       | 8.71                     |
| 249724_at                             | At5g35450              | Disease Resistance Protein (CC-NBS-LRR Class), Putative                  | 0.0457                       | 0.0478                       | 2.51                     |
| 247413_at                             | At5g63020              | Disease Resistance Protein (CC-NBS-LRR Class), Putative                  | 0.0177                       | 0.0291                       | 4.46                     |
| 255090_at                             | At4g09360              | Disease Resistance Protein (Nbs-Lrr Class), Putative                     | 0.0187                       | 0.0300                       | 2.68                     |
| 264910_at                             | At1g61100              | Disease Resistance Protein (Tir Class), Putative                         | 0.0089                       | 0.0206                       | 2.71                     |
| 260734_at                             | At1g17600              | Disease Resistance Protein (TIR-NBS-LRRClass), Putative                  | 0.0198                       | 0.0308                       | 7.37                     |
| 254553_at                             | At4g19530              | Disease Resistance Protein (TIR-NBS-LRRClass), Putative                  | 0.0084                       | 0.0200                       | 2.72                     |
| 250069_at                             | At5g17970              | Disease Resistance Protein (TIR-NBS-LRRClass), Putative                  | 0.0432                       | 0.0463                       | 3.43                     |
| 250039_at                             | At5g18370              | Disease Resistance Protein (TIR-NBS-LRRClass), Putative                  | 0.0003                       | 0.0043                       | 6.73                     |
| 249639_at                             | At5g36930              | Disease Resistance Protein (TIR-NBS-LRRClass), Putative                  | 0.0118                       | 0.0239                       | 5.82                     |
| 248989_at                             | At5g45200              | Disease Resistance Protein (TIR-NBS-LRRClass), Putative                  | 0.0437                       | 0.0466                       | 13.09                    |
| 248873_at                             | At5g46450              | Disease Resistance Protein (TIR-NBS-LRRClass), Putative                  | 0.0004                       | 0.0050                       | 3.14                     |
| 252485_at                             | At3g46530              | Disease Resistance Protein, Rpp13-Like (CC-NBS Class), Putative          | 0.0021                       | 0.0106                       | 2.79                     |
| 248979_at                             | At5g45080              | Disease Resistance Protein-Related                                       | 0.0008                       | 0.0071                       | 3.24                     |
| 261464_at                             | At1g07730              | Disease Resistance-Responsive Family Protein                             | 0.0389                       | 0.0437                       | 6.48                     |
| 266978_at                             | At2g39430              | Disease Resistance-Responsive Protein-Related / Dirigent Protein-Related | 0.0301                       | 0.0381                       | 3.93                     |
| 259736_at                             | At1g64390              | Endo-1,4-Beta-Glucanase, Putative / Cellulase, Putative                  | 0.0002                       | 0.0037                       | 2.62                     |
| 262674_at                             | At1g75910              | Extracellular Lipase 4 (Exl4)                                            | 0.0260                       | 0.0354                       | 2.99                     |
| 252209_at                             | At3g50400              | Gdsl-Motif Lipase/Hydrolase Family Protein                               | 0.0041                       | 0.0145                       | 4.84                     |
| 249474_s_at                           | At5g39190              | Germin-Like Protein (Ger2)                                               | 0.0076                       | 0.0191                       | 5.38                     |
| 249075_at                             | At5g44000              | Glutathione S-Transferase C-Terminal Domain-Containing Protein           | 0.0036                       | 0.0138                       | 4.57                     |
| 259813_at                             | At1g49860              | Glutathione S-Transferase, Putative                                      | 0.0258                       | 0.0353                       | 3.70                     |
| 260796_at                             | At1g78360              | Glutathione S-Transferase, Putative                                      | 0.0206                       | 0.0315                       | 16.19                    |
| 264476_at                             | At1g77130              | Glycogenin Glucosyltransferase (Glycogenin)-Related                      | 0.0125                       | 0.0246                       | 2.58                     |
| 246402_at                             | At1g57570              | Jacalin Lectin Family Protein                                            | 0.0082                       | 0.0199                       | 7.39                     |
| 259327_at                             | At3g16460              | Jacalin Lectin Family Protein                                            | 0.0001                       | 0.0028                       | 2.79                     |
| 259381_s_at                           | At3g16390              | Jacalin Lectin Family Protein                                            | 0.0125                       | 0.0246                       | 4.75                     |
| 259382_s_at                           | At3g16430              | Jacalin Lectin Family Protein                                            | 0.0220                       | 0.0324                       | 2.99                     |
| 265051_at                             | At1g52100              | Jacalin Lectin Family Protein                                            | 0.0025                       | 0.0115                       | 5.03                     |
| 266989_at                             | At2g39330              | Jacalin Lectin Family Protein                                            | 0.0007                       | 0.0067                       | 2.64                     |
| 254715_at                             | At4g13550              | Lipase Class 3 Family Protein                                            | 0.0010                       | 0.0077                       | 2.64                     |
| 260833_at                             | At1g06800              | Lipase Class 3 Family Protein                                            | 0.0301                       | 0.0382                       | 3.96                     |
| 260393_at                             | At1g73920              | Lipase Family Protein                                                    | 0.0036                       | 0.0138                       | 3.20                     |
| 265111_at                             | At1g62510              | Lipid Transfer Protein (Ltp) Family Protein                              | 0.0469                       | 0.0483                       | 2.76                     |
| 265400_at                             | At2g10940              | Lipid Transfer Protein (Ltp) Family Protein                              | 0.0111                       | 0.0231                       | 2.57                     |
| 265656_at                             | At2g13820              | Lipid Transfer Protein (Ltp) Family Protein                              | 0.0016                       | 0.0094                       | 5.97                     |
| 262349_at                             | At2g48130              | Lipid Transfer Protein (Ltp) Family Protein                              | 0.0258                       | 0.0353                       | 4.59                     |
| 262317_at                             | At2g48140              | Lipid Transfer Protein (Ltp) Family Protein                              | 0.0056                       | 0.0167                       | 10.83                    |
| 256825_at                             | At3g22120              | Lipid Transfer Protein (Ltp) Family Protein                              | 0.0090                       | 0.0208                       | 4.28                     |
| 256937_at                             | At3g22620              | Lipid Transfer Protein (Ltp) Family Protein                              | 0.0070                       | 0.0183                       | 3.32                     |
| 254820_s_at                           | At4g12510              | Lipid Transfer Protein (Ltp) Family Protein                              | 0.0353                       | 0.0415                       | 7.78                     |
| 248844_s_at                           | At5g46900              | Lipid Transfer Protein (Ltp) Family Protein                              | 0.0054                       | 0.0164                       | 7.04                     |
| 247718_at                             | At5g59310              | Lipid Transfer Protein 4 (Ltp4)                                          | 0.0110                       | 0.0230                       | 4.00                     |
| 266566_at                             | At2g24040              | Low Temperature And Salt Responsive Protein, Putative                    | 0.0165                       | 0.0282                       | 5.56                     |
| 266383_at                             | At2g14580              | Pathogenesis-Related Protein, Putative                                   | 0.0321                       | 0.0394                       | 4.05                     |
| 262727_at                             | At1g75800              | Pathogenesis-Related Thaumatin Family Protein                            | 0.0296                       | 0.0379                       | 2.57                     |
| 254206_at                             | At4g24180              | Pathogenesis-Related Thaumatin Family Protein                            | 0.0001                       | 0.0026                       | 16.94                    |
| 252949_at                             | At4g38670              | Pathogenesis-Related Thaumatin Family Protein                            | 0.0037                       | 0.0140                       | 2.52                     |
| 265091_s_at                           | At1g03495              | Pseudogene, Transferase Family                                           | 0.0020                       | 0.0103                       | 13.68                    |
| 259519_at                             | At1g12270              | Stress-Inducible Protein, Putative                                       | 0.0029                       | 0.0125                       | 4.67                     |
| 266165_at                             | At2g28190              | Superoxide Dismutase (Cu-Zn), Chloroplast (Sodcp)                        | 0.0003                       | 0.0044                       | 7.22                     |

|           |           |                                                                     |        |        |      |
|-----------|-----------|---------------------------------------------------------------------|--------|--------|------|
| 259511_at | At1g12520 | Superoxide Dismutase Copper Chaperone, Putative                     | 0.0249 | 0.0347 | 2.93 |
| 257125_at | At3g20050 | T-Complex Protein 1 Alpha Subunit / Tcp-1-Alpha / Chaperonin (Cct1) | 0.0166 | 0.0282 | 2.50 |
| 255077_at | At4g09150 | T-Complex Protein 11                                                | 0.0015 | 0.0091 | 2.94 |
| 252954_at | At4g38660 | Thaumatin, Putative                                                 | 0.0041 | 0.0146 | 5.99 |
| 256125_at | At1g18250 | Thaumatin, Putative                                                 | 0.0441 | 0.0469 | 4.32 |
| 264768_at | At1g61410 | Tola Protein, Proline-Related                                       | 0.0267 | 0.0359 | 3.63 |
| 245516_at | At4g15820 | Wound-Responsive Protein-Related                                    | 0.0001 | 0.0025 | 5.53 |

#### A1. Protein folding/heat shock/chaperone activity

|             |           |                                                                                 |        |        |       |
|-------------|-----------|---------------------------------------------------------------------------------|--------|--------|-------|
| 256905_at   | At3g23990 | Chaperonin (Cpn60) (Hsp60)                                                      | 0.0383 | 0.0433 | 2.68  |
| 258816_at   | At3g03960 | Chaperonin, Putative                                                            | 0.0185 | 0.0298 | 2.81  |
| 256983_at   | At3g13470 | Chaperonin, Putative                                                            | 0.0363 | 0.0421 | 3.75  |
| 257608_at   | At3g13860 | Chaperonin, Putative                                                            | 0.0192 | 0.0303 | 2.70  |
| 249977_at   | At5g18820 | Chaperonin, Putative                                                            | 0.0155 | 0.0274 | 10.98 |
| 247331_at   | At5g63530 | Copper Chaperone (Cch)-Related                                                  | 0.0073 | 0.0188 | 4.82  |
| 263374_at   | At2g20560 | DNA J Heat Shock Family Protein                                                 | 0.0344 | 0.0409 | 3.75  |
| 258220_at   | At3g17830 | DNA J Heat Shock Family Protein                                                 | 0.0284 | 0.0371 | 7.15  |
| 258986_at   | At3g08910 | DNA J Heat Shock Family Protein                                                 | 0.0000 | 0.0014 | 2.68  |
| 252670_at   | At3g44110 | DNA J Heat Shock Family Protein                                                 | 0.0097 | 0.0215 | 4.66  |
| 260251_at   | At1g74250 | DNA J Heat Shock N-Terminal Domain-Containing Protein                           | 0.0031 | 0.0128 | 4.89  |
| 265613_at   | At2g25560 | DNA J Heat Shock N-Terminal Domain-Containing Protein                           | 0.0011 | 0.0079 | 4.17  |
| 266858_at   | At2g26890 | DNA J Heat Shock N-Terminal Domain-Containing Protein                           | 0.0297 | 0.0379 | 2.66  |
| 265850_at   | At2g35720 | DNA J Heat Shock N-Terminal Domain-Containing Protein                           | 0.0082 | 0.0199 | 4.23  |
| 245176_at   | At2g47440 | DNA J Heat Shock N-Terminal Domain-Containing Protein                           | 0.0182 | 0.0295 | 3.26  |
| 259087_at   | At3g04980 | DNA J Heat Shock N-Terminal Domain-Containing Protein                           | 0.0016 | 0.0095 | 7.52  |
| 257654_at   | At3g13310 | DNA J Heat Shock N-Terminal Domain-Containing Protein                           | 0.0107 | 0.0227 | 2.53  |
| 255801_at   | At4g10130 | DNA J Heat Shock N-Terminal Domain-Containing Protein                           | 0.0007 | 0.0065 | 7.68  |
| 250004_at   | At5g18750 | DNA J Heat Shock N-Terminal Domain-Containing Protein                           | 0.0005 | 0.0056 | 12.38 |
| 259284_at   | At3g11450 | Dnaj Heat Shock N-Terminal Domain-Containing Protein                            | 0.0021 | 0.0105 | 4.36  |
| 250995_at   | At5g02500 | Heat Shock Cognate 70 Kda Protein 1 (Hsc70-1) (Hsp70-1)                         | 0.0120 | 0.0241 | 4.56  |
| 258979_at   | At3g09440 | Heat Shock Cognate 70 Kda Protein 3 (Hsc70-3) (Hsp70-3)                         | 0.0023 | 0.0111 | 3.18  |
| 245379_at   | At4g17750 | Heat Shock Factor Protein 1 (Hsf1)                                              | 0.0034 | 0.0135 | 3.90  |
| 246450_at   | At5g16820 | Heat Shock Factor Protein 3 (Hsf3)                                              | 0.0328 | 0.0398 | 2.60  |
| 246554_at   | At5g15450 | Heat Shock Protein 100, Putative                                                | 0.0001 | 0.0026 | 5.13  |
| 250502_at   | At5g09590 | Heat Shock Protein 70 / Hsp70 (Hsc70-5)                                         | 0.0037 | 0.0139 | 6.67  |
| 248582_at   | At5g49910 | Heat Shock Protein 70 / Hsp70 (Hsc70-7)                                         | 0.0046 | 0.0152 | 2.63  |
| 253013_at   | At4g37910 | Heat Shock Protein 70, Mitochondrial, Putative / Hsp70, Mitochondrial, Putative | 0.0015 | 0.0092 | 3.64  |
| 245293_at   | At4g16660 | Heat Shock Protein 70, Putative / Hsp70, Putative                               | 0.0075 | 0.0189 | 3.08  |
| 254148_at   | At4g24280 | Heat Shock Protein 70, Putative / Hsp70, Putative                               | 0.0026 | 0.0117 | 4.68  |
| 262054_s_at | At1g79920 | Heat Shock Protein 70, Putative / Hsp70, Putative                               | 0.0356 | 0.0416 | 3.31  |
| 256245_at   | At3g12580 | Heat Shock Protein 70, Putative / Hsp70, Putative                               | 0.0001 | 0.0031 | 5.24  |
| 248332_at   | At5g52640 | Heat Shock Protein 81-1 (Hsp81-1) / Heat Shock Protein 83 (Hsp83)               | 0.0016 | 0.0094 | 6.36  |
| 248045_at   | At5g56030 | Heat Shock Protein 81-2 (Hsp81-2)                                               | 0.0000 | 0.0016 | 4.63  |
| 248043_s_at | At5g56000 | Heat Shock Protein 81-4 (Hsp81-4)                                               | 0.0001 | 0.0028 | 4.75  |
| 262814_at   | At1g11660 | Heat Shock Protein, Putative                                                    | 0.0000 | 0.0005 | 3.83  |
| 263483_at   | At2g04030 | Heat Shock Protein, Putative                                                    | 0.0185 | 0.0298 | 2.68  |
| 259248_at   | At3g07770 | Heat Shock Protein-Related                                                      | 0.0001 | 0.0027 | 2.75  |
| 266772_s_at | At2g03020 | Heat Shock Protein-Related                                                      | 0.0339 | 0.0405 | 5.85  |
| 245956_s_at | At5g28540 | Luminal Binding Protein 1 (Bip-1) (Bp1)                                         | 0.0009 | 0.0073 | 4.60  |
| 252644_at   | At3g44600 | Peptidyl-Prolyl Cis-Trans Isomerase Cyclophilin-Type Family Protein             | 0.0012 | 0.0083 | 3.04  |
| 265087_at   | At1g03760 | Prefoldin Subunit Family Protein                                                | 0.0052 | 0.0161 | 2.81  |
| 248094_at   | At5g55220 | Trigger Factor Type Chaperone Family Protein                                    | 0.0101 | 0.0220 | 2.53  |

#### A2. Cell wall associated transcripts

##### A2.1. Reassembly of cell wall associated genes

|           |           |                                                                        |        |        |      |
|-----------|-----------|------------------------------------------------------------------------|--------|--------|------|
| 264656_at | At1g09010 | Glycoside Hydrolase Family 2 Protein                                   | 0.0001 | 0.0023 | 2.94 |
| 262299_at | At1g27520 | Glycoside Hydrolase Family 47 Protein                                  | 0.0293 | 0.0377 | 2.54 |
| 245094_at | At2g40840 | Glycoside Hydrolase Family 77 Protein                                  | 0.0037 | 0.0139 | 2.77 |
| 246829_at | At5g26570 | Glycoside Hydrolase Starch-Binding Domain-Containing Protein           | 0.0024 | 0.0112 | 4.15 |
| 262118_at | At1g02850 | Glycosyl Hydrolase Family 1 Protein                                    | 0.0393 | 0.0439 | 3.28 |
| 258512_at | At3g06510 | Glycosyl Hydrolase Family 1 Protein                                    | 0.0052 | 0.0161 | 4.16 |
| 258151_at | At3g18080 | Glycosyl Hydrolase Family 1 Protein                                    | 0.0247 | 0.0345 | 4.13 |
| 249636_at | At5g36890 | Glycosyl Hydrolase Family 1 Protein                                    | 0.0439 | 0.0467 | 5.06 |
| 259640_at | At1g52400 | Glycosyl Hydrolase Family 1 Protein / Beta-Glucosidase, Putative (Bg1) | 0.0241 | 0.0341 | 2.80 |
| 249235_at | At5g42100 | Glycosyl Hydrolase Family 17 Protein                                   | 0.0008 | 0.0071 | 3.32 |
| 247845_at | At5g58090 | Glycosyl Hydrolase Family 17 Protein                                   | 0.0428 | 0.0460 | 2.60 |
| 262181_at | At1g78060 | Glycosyl Hydrolase Family 3 Protein                                    | 0.0284 | 0.0371 | 2.63 |
| 252445_at | At3g47000 | Glycosyl Hydrolase Family 3 Protein                                    | 0.0127 | 0.0248 | 3.89 |
| 251228_at | At3g62710 | Glycosyl Hydrolase Family 3 Protein                                    | 0.0048 | 0.0155 | 5.39 |
| 247266_at | At5g64570 | Glycosyl Hydrolase Family 3 Protein                                    | 0.0051 | 0.0160 | 5.26 |
| 250604_at | At5g07830 | Glycosyl Hydrolase Family 79 N-Terminal Domain-Containing Protein      | 0.0353 | 0.0414 | 2.77 |
| 261665_at | At1g18310 | Glycosyl Hydrolase Family 81 Protein                                   | 0.0392 | 0.0438 | 3.52 |
| 267595_at | At2g32990 | Glycosyl Hydrolase Family 9 Protein                                    | 0.0424 | 0.0457 | 2.61 |

|             |           |                                      |        |        |      |
|-------------|-----------|--------------------------------------|--------|--------|------|
| 255054_s_at | At4g09740 | Glycosyl Hydrolase Family 9 Protein  | 0.0166 | 0.0282 | 4.46 |
| 260584_at   | At2g43660 | Glycosyl Hydrolase Family Protein 17 | 0.0343 | 0.0408 | 5.64 |
| 247563_at   | At5g61130 | Glycosyl Hydrolase Family Protein 17 | 0.0078 | 0.0193 | 3.75 |
| 252740_at   | At3g43270 | Pectinesterase Family Protein        | 0.0059 | 0.0170 | 2.78 |
| 250490_at   | At5g09760 | Pectinesterase Family Protein        | 0.0010 | 0.0078 | 4.10 |
| 248263_at   | At5g53370 | Pectinesterase Family Protein        | 0.0259 | 0.0354 | 3.96 |

#### A2.2. Matrix polymers

|           |           |                                                                               |        |        |      |
|-----------|-----------|-------------------------------------------------------------------------------|--------|--------|------|
| 245725_at | At1g73370 | Glucosyltransferase, Putative                                                 | 0.0152 | 0.0272 | 3.03 |
| 255521_at | At4g02280 | Glucosyltransferase, Putative                                                 | 0.0450 | 0.0474 | 3.15 |
| 257797_at | At3g15940 | Glycosyl Transferase Family 1 Protein                                         | 0.0059 | 0.0170 | 3.06 |
| 259041_at | At3g07330 | Glycosyl Transferase Family 2 Protein                                         | 0.0478 | 0.0488 | 3.21 |
| 263019_at | At1g23870 | Glycosyl Transferase Family 20 Protein / Trehalose-Phosphatase Family Protein | 0.0076 | 0.0192 | 3.98 |
| 264246_at | At1g60140 | Glycosyl Transferase Family 20 Protein / Trehalose-Phosphatase Family Protein | 0.0037 | 0.0139 | 2.82 |
| 266072_at | At2g18700 | Glycosyl Transferase Family 20 Protein / Trehalose-Phosphatase Family Protein | 0.0015 | 0.0090 | 3.55 |
| 245348_at | At4g17770 | Glycosyl Transferase Family 20 Protein / Trehalose-Phosphatase Family Protein | 0.0011 | 0.0081 | 3.54 |
| 265729_at | At2g31960 | Glycosyl Transferase Family 48 Protein                                        | 0.0076 | 0.0191 | 3.68 |
| 263891_at | At2g36850 | Glycosyl Transferase Family 48 Protein                                        | 0.0017 | 0.0098 | 4.08 |
| 250272_at | At5g13000 | Glycosyl Transferase Family 48 Protein                                        | 0.0009 | 0.0071 | 2.69 |
| 253037_at | At4g38270 | Glycosyl Transferase Family 8 Protein                                         | 0.0067 | 0.0180 | 3.61 |
| 254552_at | At4g19900 | Glycosyl Transferase-Related                                                  | 0.0151 | 0.0271 | 6.65 |
| 262744_at | At1g28680 | Transferase Family Protein                                                    | 0.0289 | 0.0374 | 2.57 |
| 267440_at | At2g19070 | Transferase Family Protein                                                    | 0.0335 | 0.0402 | 3.72 |
| 258070_at | At3g26040 | Transferase Family Protein                                                    | 0.0018 | 0.0098 | 9.15 |
| 256924_at | At3g29590 | Transferase Family Protein                                                    | 0.0037 | 0.0140 | 5.50 |
| 248639_at | At5g48930 | Transferase Family Protein                                                    | 0.0005 | 0.0056 | 3.82 |
| 263176_at | At1g05530 | Udp-Glucuronosyl/Udp-Glucosyl Transferase Family Protein                      | 0.0140 | 0.0260 | 8.39 |
| 266532_at | At2g16890 | Udp-Glucuronosyl/Udp-Glucosyl Transferase Family Protein                      | 0.0138 | 0.0258 | 8.49 |
| 263477_at | At2g31790 | Udp-Glucuronosyl/Udp-Glucosyl Transferase Family Protein                      | 0.0117 | 0.0237 | 3.04 |
| 257205_at | At3g16520 | Udp-Glucuronosyl/Udp-Glucosyl Transferase Family Protein                      | 0.0000 | 0.0006 | 2.72 |
| 257949_at | At3g21750 | Udp-Glucuronosyl/Udp-Glucosyl Transferase Family Protein                      | 0.0001 | 0.0027 | 2.94 |
| 252476_at | At3g46650 | Udp-Glucuronosyl/Udp-Glucosyl Transferase Family Protein                      | 0.0312 | 0.0388 | 5.92 |
| 252482_at | At3g46670 | Udp-Glucuronosyl/Udp-Glucosyl Transferase Family Protein                      | 0.0005 | 0.0054 | 3.47 |
| 250750_at | At5g05870 | Udp-Glucuronosyl/Udp-Glucosyl Transferase Family Protein                      | 0.0181 | 0.0295 | 2.93 |
| 246826_at | At5g26310 | Udp-Glucuronosyl/Udp-Glucosyl Transferase Family Protein                      | 0.0387 | 0.0436 | 3.46 |

#### A2.3. Structural proteins

|           |           |                                                              |        |        |       |
|-----------|-----------|--------------------------------------------------------------|--------|--------|-------|
| 266552_at | At2g46330 | Arabinogalactan-Protein (Agp16)                              | 0.0091 | 0.0208 | 3.78  |
| 266588_at | At2g14890 | Arabinogalactan-Protein (Agp9)                               | 0.0337 | 0.0404 | 5.94  |
| 262849_at | At1g14710 | Hydroxyproline-Rich Glycoprotein Family Protein              | 0.0305 | 0.0384 | 5.97  |
| 260984_at | At1g53645 | Hydroxyproline-Rich Glycoprotein Family Protein              | 0.0019 | 0.0101 | 4.66  |
| 245655_at | At1g56530 | Hydroxyproline-Rich Glycoprotein Family Protein              | 0.0235 | 0.0336 | 8.00  |
| 262187_at | At1g77970 | Hydroxyproline-Rich Glycoprotein Family Protein              | 0.0259 | 0.0354 | 2.52  |
| 261347_at | At1g79730 | Hydroxyproline-Rich Glycoprotein Family Protein              | 0.0029 | 0.0125 | 3.81  |
| 255838_at | At2g33490 | Hydroxyproline-Rich Glycoprotein Family Protein              | 0.0151 | 0.0270 | 14.89 |
| 266170_at | At2g39050 | Hydroxyproline-Rich Glycoprotein Family Protein              | 0.0325 | 0.0397 | 2.53  |
| 266460_at | At2g47930 | Hydroxyproline-Rich Glycoprotein Family Protein              | 0.0145 | 0.0264 | 3.57  |
| 258206_at | At3g14010 | Hydroxyproline-Rich Glycoprotein Family Protein              | 0.0004 | 0.0052 | 3.10  |
| 258455_at | At3g22440 | Hydroxyproline-Rich Glycoprotein Family Protein              | 0.0108 | 0.0228 | 4.38  |
| 258282_at | At3g26910 | Hydroxyproline-Rich Glycoprotein Family Protein              | 0.0043 | 0.0148 | 4.44  |
| 253800_at | At4g28160 | Hydroxyproline-Rich Glycoprotein Family Protein              | 0.0117 | 0.0238 | 7.31  |
| 250500_at | At5g09530 | Hydroxyproline-Rich Glycoprotein Family Protein              | 0.0201 | 0.0310 | 90.14 |
| 247149_at | At5g65660 | Hydroxyproline-Rich Glycoprotein Family Protein              | 0.0031 | 0.0128 | 2.87  |
| 264226_at | At1g67510 | Leucine-Rich Repeat Family Protein                           | 0.0211 | 0.0317 | 4.76  |
| 267310_at | At2g34680 | Leucine-Rich Repeat Family Protein                           | 0.0019 | 0.0102 | 2.92  |
| 258409_at | At3g17640 | Leucine-Rich Repeat Family Protein                           | 0.0190 | 0.0301 | 10.30 |
| 248945_at | At5g45510 | Leucine-Rich Repeat Family Protein                           | 0.0025 | 0.0115 | 2.55  |
| 245202_at | At1g67720 | Leucine-Rich Repeat Family Protein                           | 0.0140 | 0.0259 | 3.53  |
| 265467_at | At2g37050 | Leucine-Rich Repeat Family Protein                           | 0.0018 | 0.0099 | 4.24  |
| 256981_at | At3g13380 | Leucine-Rich Repeat Family Protein                           | 0.0273 | 0.0363 | 5.09  |
| 250642_at | At5g07180 | Leucine-Rich Repeat Family Protein                           | 0.0412 | 0.0451 | 6.85  |
| 263590_at | At2g01820 | Leucine-Rich Repeat Family Protein                           | 0.0087 | 0.0204 | 4.62  |
| 267376_at | At2g26330 | Leucine-Rich Repeat Family Protein                           | 0.0003 | 0.0042 | 4.76  |
| 256516_at | At1g66150 | Leucine-Rich Repeat Family Protein                           | 0.0281 | 0.0369 | 3.94  |
| 253769_at | At4g28560 | Leucine-Rich Repeat Family Protein (Fragment)                | 0.0016 | 0.0093 | 7.08  |
| 262393_at | At1g49490 | Leucine-Rich Repeat Family Protein / Extensin Family Protein | 0.0422 | 0.0456 | 2.77  |
| 258342_at | At3g22800 | Leucine-Rich Repeat Family Protein / Extensin Family Protein | 0.0277 | 0.0366 | 2.89  |
| 248363_at | At5g52480 | Leucine-Rich Repeat Protein, N7-Related                      | 0.0485 | 0.0493 | 4.49  |
| 247445_at | At5g62640 | Proline-Rich Family Protein                                  | 0.0195 | 0.0305 | 2.91  |
| 252161_at | At3g50580 | Proline-Rich Family Protein                                  | 0.0018 | 0.0099 | 3.96  |
| 252971_at | At4g38770 | Proline-Rich Family Protein (Ptp4)                           | 0.0435 | 0.0465 | 3.60  |

#### B. Cellular communication/signal transduction mechanism/transmembrane signal transduction

|           |           |                               |        |        |      |
|-----------|-----------|-------------------------------|--------|--------|------|
| 262506_at | At1g21640 | Atp-Nad Kinase Family Protein | 0.0333 | 0.0401 | 3.27 |
|-----------|-----------|-------------------------------|--------|--------|------|

|             |           |                                                                                 |        |        |       |
|-------------|-----------|---------------------------------------------------------------------------------|--------|--------|-------|
| 246284_at   | At4g36780 | Brassinosteroid Signalling Positive Regulator-Related                           | 0.0027 | 0.0119 | 16.42 |
| 250393_at   | At5g10900 | Calcineurin                                                                     | 0.0066 | 0.0179 | 10.38 |
| 247137_at   | At5g66210 | Calcium-Dependent Protein Kinase Family Protein / Cdpk Family Protein           | 0.0016 | 0.0093 | 2.63  |
| 267531_at   | At2g41860 | Calcium-Dependent Protein Kinase, Putative / Cdpk, Putative                     | 0.0060 | 0.0171 | 5.29  |
| 251636_at   | At3g57530 | Calcium-Dependent Protein Kinase, Putative / Cdpk, Putative                     | 0.0255 | 0.0352 | 3.32  |
| 261433_s_at | At1g07670 | Calcium-Transporting Atpase 4, Endoplasmic Reticulum-Type (Eca4)                | 0.0208 | 0.0316 | 4.64  |
| 253995_at   | At4g26100 | Casein Kinase, Putative                                                         | 0.0068 | 0.0181 | 3.70  |
| 257938_at   | At3g19820 | Cell Elongation Protein / Dwarf1 / Diminuto (Dim)                               | 0.0240 | 0.0340 | 5.46  |
| 250632_at   | At5g07450 | Cyclin Family Protein                                                           | 0.0004 | 0.0050 | 7.08  |
| 247536_at   | At5g61650 | Cyclin Family Protein                                                           | 0.0037 | 0.0139 | 3.79  |
| 260504_at   | At1g47220 | Cyclin, Putative                                                                | 0.0042 | 0.0147 | 6.55  |
| 267618_at   | At2g26760 | Cyclin, Putative                                                                | 0.0195 | 0.0305 | 3.87  |
| 263017_at   | At2g17620 | Cyclin, Putative (Cyc2A)                                                        | 0.0154 | 0.0273 | 3.44  |
| 250369_at   | At5g11300 | Cyclin, Putative (Cyc3B)                                                        | 0.0013 | 0.0086 | 8.53  |
| 262833_at   | At1g14750 | Cyclin, Putative (Sds)                                                          | 0.0013 | 0.0085 | 18.39 |
| 250451_at   | At5g10270 | Cyclin-Dependent Kinase, Putative / Cdk, Putative                               | 0.0382 | 0.0432 | 2.92  |
| 257073_at   | At3g19650 | Cyclin-Related                                                                  | 0.0113 | 0.0233 | 4.58  |
| 245478_at   | At4g16130 | Ghmp Kinase Family Protein                                                      | 0.0153 | 0.0272 | 3.78  |
| 246286_at   | At1g31910 | Ghmp Kinase Family Protein                                                      | 0.0191 | 0.0302 | 2.65  |
| 261043_at   | At1g01220 | Ghmp Kinase-Related                                                             | 0.0071 | 0.0185 | 2.50  |
| 258341_at   | At3g22790 | Kinase Interacting Family Protein                                               | 0.0007 | 0.0066 | 8.59  |
| 267518_at   | At2g30500 | Kinase Interacting Family Protein                                               | 0.0078 | 0.0193 | 3.54  |
| 252975_s_at | At4g38430 | Kinase protein like gene family                                                 | 0.0019 | 0.0101 | 2.82  |
| 247626_at   | At5g60300 | Lectin Protein Kinase Family Protein                                            | 0.0019 | 0.0100 | 2.51  |
| 266281_at   | At2g29250 | Lectin Protein Kinase, Putative                                                 | 0.0241 | 0.0341 | 7.27  |
| 255503_at   | At4g02420 | Lectin Protein Kinase, Putative                                                 | 0.0487 | 0.0494 | 3.25  |
| 255121_at   | At4g08480 | Mitogen-Activated Protein Kinase, Putative                                      | 0.0491 | 0.0495 | 2.64  |
| 249964_at   | At5g19010 | Mitogen-Activated Protein Kinase, Putative / Mapk, Putative (Mpk16)             | 0.0227 | 0.0331 | 5.49  |
| 255806_at   | At4g10260 | Pfkf-Type Carbohydrate Kinase Family Protein                                    | 0.0363 | 0.0421 | 3.87  |
| 252459_s_at | At3g47220 | Phosphoinositide-Specific Phospholipase C Family Protein                        | 0.0019 | 0.0101 | 2.91  |
| 267536_at   | At2g42010 | Phospholipase D Beta 1 / Pld Beta 1 (Pldbeta1)                                  | 0.0206 | 0.0315 | 3.92  |
| 265522_at   | At2g06210 | Phosphoprotein-Related                                                          | 0.0262 | 0.0356 | 9.07  |
| 256982_at   | At3g13460 | Physically interacts with CIPK1                                                 | 0.0314 | 0.0389 | 2.96  |
| 245358_at   | At4g15900 | Pp1/Pp2A Phosphatases Pleiotropic Regulator 1 (Pr11)                            | 0.0237 | 0.0338 | 2.70  |
| 251315_at   | At3g61410 | Protein kinase                                                                  | 0.0032 | 0.0130 | 6.77  |
| 251994_at   | At3g52890 | Protein Kinase (Kipk)                                                           | 0.0216 | 0.0321 | 3.01  |
| 264602_at   | At1g04700 | Protein Kinase Family Protein                                                   | 0.0155 | 0.0274 | 5.17  |
| 245845_at   | At1g26150 | Protein Kinase Family Protein                                                   | 0.0266 | 0.0358 | 2.95  |
| 260036_at   | At1g68830 | Protein Kinase Family Protein                                                   | 0.0040 | 0.0145 | 3.50  |
| 260362_at   | At1g70530 | Protein Kinase Family Protein                                                   | 0.0036 | 0.0138 | 2.55  |
| 261883_at   | At1g80870 | Protein Kinase Family Protein                                                   | 0.0423 | 0.0456 | 2.51  |
| 264621_at   | At2g17700 | Protein Kinase Family Protein                                                   | 0.0461 | 0.0479 | 2.77  |
| 265923_at   | At2g18470 | Protein Kinase Family Protein                                                   | 0.0172 | 0.0286 | 2.55  |
| 265308_at   | At2g20300 | Protein Kinase Family Protein                                                   | 0.0176 | 0.0291 | 17.00 |
| 267599_at   | At2g32850 | Protein Kinase Family Protein                                                   | 0.0016 | 0.0094 | 5.08  |
| 267422_at   | At2g35050 | Protein Kinase Family Protein                                                   | 0.0010 | 0.0078 | 5.32  |
| 256783_at   | At3g13670 | Protein Kinase Family Protein                                                   | 0.0040 | 0.0145 | 3.90  |
| 255559_at   | At4g02010 | Protein Kinase Family Protein                                                   | 0.0415 | 0.0452 | 4.96  |
| 254251_at   | At4g23300 | Protein Kinase Family Protein                                                   | 0.0187 | 0.0299 | 2.82  |
| 251122_at   | At5g01020 | Protein Kinase Family Protein                                                   | 0.0320 | 0.0393 | 2.64  |
| 251068_at   | At5g01920 | Protein Kinase Family Protein                                                   | 0.0023 | 0.0110 | 3.99  |
| 250341_at   | At5g11850 | Protein Kinase Family Protein                                                   | 0.0013 | 0.0087 | 4.57  |
| 249950_at   | At5g18910 | Protein Kinase Family Protein                                                   | 0.0450 | 0.0474 | 3.32  |
| 247918_at   | At5g57610 | Protein Kinase Family Protein                                                   | 0.0224 | 0.0328 | 2.68  |
| 247661_at   | At5g60080 | Protein Kinase Family Protein                                                   | 0.0002 | 0.0037 | 3.99  |
| 247853_at   | At5g58140 | Protein Kinase Family Protein / Non Phototropic Hypocotyl 1-Like Protein (Npl1) | 0.0034 | 0.0133 | 4.59  |
| 262106_at   | At1g02970 | Protein Kinase, Putative                                                        | 0.0124 | 0.0245 | 11.20 |
| 264625_at   | At1g09020 | Protein Kinase, Putative                                                        | 0.0257 | 0.0353 | 4.13  |
| 259887_at   | At1g76360 | Protein Kinase, Putative                                                        | 0.0490 | 0.0495 | 3.11  |
| 265581_at   | At2g20040 | Protein Kinase, Putative                                                        | 0.0011 | 0.0080 | 2.63  |
| 259083_at   | At3g04810 | Protein Kinase, Putative                                                        | 0.0467 | 0.0483 | 14.19 |
| 257696_at   | At3g12690 | Protein Kinase, Putative                                                        | 0.0007 | 0.0063 | 4.68  |
| 258186_s_at | At3g17850 | Protein Kinase, Putative                                                        | 0.0326 | 0.0397 | 4.52  |
| 254560_at   | At4g19110 | Protein Kinase, Putative                                                        | 0.0270 | 0.0361 | 3.01  |
| 254269_at   | At4g23050 | Protein Kinase, Putative                                                        | 0.0060 | 0.0172 | 3.01  |
| 253976_at   | At4g26610 | Protein Kinase, Putative                                                        | 0.0357 | 0.0416 | 2.87  |
| 248720_at   | At5g47750 | Protein Kinase, Putative                                                        | 0.0257 | 0.0353 | 3.68  |
| 247334_at   | At5g63610 | Protein Kinase, Putative                                                        | 0.0004 | 0.0050 | 4.98  |
| 248300_at   | At5g53000 | Protein Phosphatase 2A-Associated 46 Kda Protein                                | 0.0174 | 0.0288 | 2.84  |
| 266758_at   | At2g46920 | Protein Phosphatase 2C Family Protein / Pp2C Family Protein                     | 0.0001 | 0.0025 | 3.74  |
| 257887_at   | At3g17090 | Protein Phosphatase 2C Family Protein / Pp2C Family Protein                     | 0.0161 | 0.0279 | 2.88  |
| 261077_at   | At1g07430 | Protein Phosphatase 2C, Putative / Pp2C, Putative                               | 0.0000 | 0.0006 | 3.44  |
| 255910_at   | At1g18030 | Protein Phosphatase 2C, Putative / Pp2C, Putative                               | 0.0019 | 0.0101 | 2.87  |
| 258901_at   | At3g05640 | Protein Phosphatase 2C, Putative / Pp2C, Putative                               | 0.0024 | 0.0112 | 2.55  |

|           |           |                                                         |        |        |       |
|-----------|-----------|---------------------------------------------------------|--------|--------|-------|
| 248428_at | At5g51760 | Protein Phosphatase 2C, Putative / Pp2C, Putative       | 0.0391 | 0.0438 | 4.80  |
| 264730_at | At1g62090 | Pseudogene, Protein Kinase Family                       | 0.0017 | 0.0096 | 9.35  |
| 245528_at | At4g15530 | Pyruvate Phosphate Dikinase Family Protein              | 0.0269 | 0.0361 | 3.73  |
| 251521_at | At3g59420 | Receptor Protein Kinase, Putative (Acr4)                | 0.0011 | 0.0081 | 14.41 |
| 263159_at | At1g54130 | Rela/Spot Protein, Putative (Rsh3)                      | 0.0162 | 0.0280 | 2.96  |
| 253612_at | At4g30310 | Ribitol Kinase, Putative                                | 0.0103 | 0.0222 | 3.02  |
| 265772_at | At2g48010 | Serine/Threonine Protein Kinase (Rfk3)                  | 0.0097 | 0.0215 | 4.31  |
| 267564_at | At2g30740 | Serine/Threonine Protein Kinase, Putative               | 0.0236 | 0.0338 | 2.85  |
| 266453_at | At2g43230 | Serine/Threonine Protein Kinase, Putative               | 0.0107 | 0.0226 | 9.76  |
| 258463_at | At3g17410 | Serine/Threonine Protein Kinase, Putative               | 0.0499 | 0.0499 | 3.36  |
| 246917_at | At5g25280 | Serine-Rich Protein-Related                             | 0.0407 | 0.0448 | 2.60  |
| 264686_at | At1g09840 | Shaggy-Related Protein Kinase Kappa / Ask-Kappa (Ask10) | 0.0238 | 0.0339 | 2.74  |
| 255635_at | At4g00720 | Shaggy-Related Protein Kinase Theta / Ask-Theta (Ask8)  | 0.0228 | 0.0331 | 6.47  |
| 261873_at | At1g11350 | S-Locus Lectin Protein Kinase Family Protein            | 0.0014 | 0.0089 | 2.51  |
| 261819_at | At1g11410 | S-Locus Protein Kinase, Putative                        | 0.0044 | 0.0149 | 2.95  |
| 264764_at | At1g61440 | S-Locus Protein Kinase, Putative                        | 0.0147 | 0.0267 | 4.19  |
| 258925_at | At3g10420 | Sporulation Protein-Related                             | 0.0228 | 0.0331 | 3.27  |
| 264776_at | At1g22860 | Tgf Beta Receptor Associated Protein-Related            | 0.0002 | 0.0036 | 3.92  |
| 256790_at | At3g16857 | Two-Component Responsive Regulator Family Protein       | 0.0230 | 0.0332 | 3.52  |

C. Cell Cycle/ DNA processing/chromatin regulation and cytoskeleton reorganization

|             |           |                                                                              |        |        |       |
|-------------|-----------|------------------------------------------------------------------------------|--------|--------|-------|
| 267175_s_at | At2g37620 | Actin 1 (Act1)                                                               | 0.0289 | 0.0373 | 2.97  |
| 257749_at   | At3g18780 | Actin 2 (Act2)                                                               | 0.0035 | 0.0135 | 2.55  |
| 260765_at   | At1g49240 | Actin 8 (Act8)                                                               | 0.0140 | 0.0260 | 2.74  |
| 267030_at   | At2g38440 | Actin microfilament                                                          | 0.0001 | 0.0030 | 5.24  |
| 245232_at   | At4g25590 | Actin-Depolymerizing Factor, Putative                                        | 0.0099 | 0.0218 | 3.39  |
| 259513_at   | At1g12430 | Armaddillo/Beta-Catenin Repeat Family Protein / Kinesin Motor Family Protein | 0.0186 | 0.0299 | 2.50  |
| 262802_at   | At1g20930 | Cell Division Control Protein, Putative                                      | 0.0062 | 0.0174 | 11.94 |
| 258649_at   | At3g09840 | Cell Division Cycle Protein 48 (Cdc48A) (Cdc48)                              | 0.0019 | 0.0100 | 5.78  |
| 251975_at   | At3g53230 | Cell Division Cycle Protein 48, Putative / Cdc48, Putative                   | 0.0090 | 0.0207 | 4.57  |
| 250899_at   | At5g03340 | Cell Division Cycle Protein 48, Putative / Cdc48, Putative                   | 0.0011 | 0.0078 | 3.85  |
| 262473_at   | At1g50250 | Cell Division Protein FtsH Homolog 1, Chloroplast (FtsH1) (Ftsh)             | 0.0068 | 0.0181 | 2.86  |
| 267603_at   | At2g32900 | Centromere/Kinetochores Protein, Putative (Zw10)                             | 0.0188 | 0.0300 | 5.33  |
| 253425_at   | At4g32190 | Centromeric Protein-Related                                                  | 0.0064 | 0.0176 | 5.51  |
| 264486_at   | At1g77180 | Chromatin Protein Family                                                     | 0.0000 | 0.0004 | 2.75  |
| 264384_at   | At2g25170 | Chromatin Remodeling Factor Chd3 (Pickle)                                    | 0.0242 | 0.0341 | 3.47  |
| 248597_at   | At5g49160 | Dna (Cytosine-5)-Methyltransferase (Athim)                                   | 0.0006 | 0.0060 | 5.98  |
| 255562_at   | At4g02070 | Dna Mismatch Repair Protein Msh6-1 (Msh6-1) (Aga3)                           | 0.0053 | 0.0163 | 4.41  |
| 264227_at   | At1g67500 | Dna Polymerase Family B Protein                                              | 0.0268 | 0.0359 | 4.84  |
| 264969_at   | At1g67320 | Dna Primase, Large Subunit Family                                            | 0.0265 | 0.0357 | 3.55  |
| 265664_at   | At2g24420 | Dna Repair Atpase-Related                                                    | 0.0099 | 0.0218 | 2.82  |
| 257027_at   | At3g19210 | Dna Repair Protein Rad54, Putative                                           | 0.0227 | 0.0331 | 3.64  |
| 264099_at   | At1g79050 | Dna Repair Protein Reca                                                      | 0.0016 | 0.0095 | 2.69  |
| 249307_s_at | At5g41370 | Dna Repair Protein, Putative                                                 | 0.0068 | 0.0181 | 3.22  |
| 248555_at   | At5g50340 | Dna Repair Protein-Related                                                   | 0.0111 | 0.0231 | 2.72  |
| 265678_at   | At2g31970 | Dna Repair-Recombination Protein (Rad50)                                     | 0.0365 | 0.0422 | 2.93  |
| 248099_at   | At5g55300 | Dna Topoisomerase I                                                          | 0.0303 | 0.0382 | 2.80  |
| 248109_at   | At5g55310 | Dna Topoisomerase I, Putative                                                | 0.0069 | 0.0182 | 3.45  |
| 247301_at   | At5g63920 | Dna Topoisomerase Iii Alpha, Putative                                        | 0.0081 | 0.0198 | 2.69  |
| 256237_at   | At3g12610 | Dna-Damage-Repair/Tolerance Protein, Putative (Drt100)                       | 0.0314 | 0.0389 | 2.98  |
| 258904_at   | At3g06400 | Dna-Dependent Atpase, Putative                                               | 0.0008 | 0.0069 | 4.83  |
| 249997_at   | At5g18620 | Dna-Dependent Atpase, Putative                                               | 0.0242 | 0.0342 | 8.19  |
| 258148_s_at | At3g18090 | Dna-Directed Rna Polymerase Family Protein                                   | 0.0461 | 0.0479 | 2.55  |
| 253133_at   | At4g35800 | Dna-Directed Rna Polymerase Ii Largest Subunit (Rpb205) (Rpii) (Rpb1)        | 0.0163 | 0.0280 | 3.18  |
| 259672_at   | At1g68990 | Dna-Directed Rna Polymerase, Mitochondrial (Rpm1)                            | 0.0031 | 0.0128 | 4.86  |
| 259908_at   | At1g60850 | Dna-Directed Rna Polymerase, Putative                                        | 0.0162 | 0.0280 | 6.49  |
| 257044_at   | At3g19720 | Dynamin Family Protein                                                       | 0.0010 | 0.0075 | 3.52  |
| 264406_at   | At1g10290 | Dynamin-Like Protein 6 (Adl6)                                                | 0.0039 | 0.0142 | 2.69  |
| 262837_at   | At1g14830 | Dynamin-Like Protein C (Dl1C)                                                | 0.0465 | 0.0481 | 2.91  |
| 262077_at   | At1g59610 | Dynamin-Like Protein, Putative (Adl3)                                        | 0.0008 | 0.0070 | 4.87  |
| 266541_at   | At2g35110 | Hem Protein-Related                                                          | 0.0215 | 0.0321 | 3.67  |
| 263909_at   | At2g36490 | Hhh-Gpd Base Excision Dna Repair Family Protein (Ros1)                       | 0.0002 | 0.0035 | 11.54 |
| 257854_at   | At3g12980 | Histone Acetyltransferase 5 (Hac5)                                           | 0.0009 | 0.0073 | 3.10  |
| 247559_at   | At5g61070 | Histone Deacetylase Family Protein (Hda18)                                   | 0.0283 | 0.0370 | 7.52  |
| 246881_at   | At5g26040 | Histone Deacetylase Family Protein (Hda2)                                    | 0.0033 | 0.0133 | 4.06  |
| 261720_at   | At1g08460 | Histone Deacetylase Family Protein (Hda8)                                    | 0.0152 | 0.0272 | 2.73  |
| 261303_at   | At1g48620 | Histone H1/H5 Family Protein                                                 | 0.0041 | 0.0145 | 3.39  |
| 258141_at   | At3g18035 | Histone H1/H5 Family Protein                                                 | 0.0018 | 0.0099 | 2.86  |
| 254717_at   | At4g13570 | Histone H2A, Putative                                                        | 0.0000 | 0.0006 | 4.88  |
| 260622_at   | At1g07980 | Histone-Like Transcription Factor (Cbf/Nf-Y) Family Protein                  | 0.0030 | 0.0126 | 3.77  |
| 246095_at   | At5g19310 | Homeotic Gene Regulator, Putative                                            | 0.0084 | 0.0201 | 13.89 |
| 252916_at   | At4g38950 | Kinesin Motor Family Protein                                                 | 0.0010 | 0.0077 | 12.37 |
| 261557_at   | At1g63640 | Kinesin Motor Protein-Related                                                | 0.0001 | 0.0021 | 22.54 |

|             |           |                                                            |        |        |       |
|-------------|-----------|------------------------------------------------------------|--------|--------|-------|
| 263762_at   | At2g21380 | Kinesin Motor Protein-Related                              | 0.0000 | 0.0017 | 3.04  |
| 252548_at   | At3g45850 | Kinesin Motor Protein-Related                              | 0.0002 | 0.0034 | 4.26  |
| 252215_at   | At3g50240 | Kinesin Motor Protein-Related                              | 0.0022 | 0.0107 | 10.21 |
| 250685_at   | At5g06670 | Kinesin Motor Protein-Related                              | 0.0224 | 0.0328 | 10.86 |
| 250429_at   | At5g10470 | Kinesin Motor Protein-Related                              | 0.0005 | 0.0057 | 3.89  |
| 247115_at   | At5g65930 | Kinesin-Like Calmodulin-Binding Protein (Zwichel)          | 0.0052 | 0.0161 | 3.16  |
| 248773_at   | At5g47820 | Kinesin-Like Protein (Fra1)                                | 0.0012 | 0.0083 | 2.56  |
| 253903_at   | At4g27180 | Kinesin-Like Protein B (Katb)                              | 0.0035 | 0.0135 | 4.20  |
| 264972_at   | At1g67370 | Meiotic Asynaptic Mutant 1 (Asy1)                          | 0.0293 | 0.0377 | 9.08  |
| 255093_s_at | At4g08580 | Microfibrillar-Associated Protein-Related                  | 0.0217 | 0.0322 | 9.74  |
| 248095_at   | At5g55230 | Microtubule Associated Protein (Map65/Ase1) Family Protein | 0.0241 | 0.0341 | 2.60  |
| 262847_at   | At1g14840 | Microtubule association protein                            | 0.0227 | 0.0331 | 10.60 |
| 265864_at   | At2g01750 | Microtubule association protein                            | 0.0002 | 0.0039 | 15.07 |
| 256623_at   | At3g19960 | Myosin (Atm)                                               | 0.0095 | 0.0213 | 3.00  |
| 259572_at   | At1g20400 | Myosin Heavy Chain-Related                                 | 0.0364 | 0.0421 | 4.61  |
| 263189_at   | At1g36100 | Myosin Heavy Chain-Related                                 | 0.0273 | 0.0363 | 4.52  |
| 265464_at   | At2g37080 | Myosin Heavy Chain-Related                                 | 0.0027 | 0.0119 | 4.85  |
| 266589_at   | At2g46250 | Myosin Heavy Chain-Related                                 | 0.0292 | 0.0376 | 3.19  |
| 251992_at   | At3g53350 | Myosin Heavy Chain-Related                                 | 0.0000 | 0.0017 | 20.53 |
| 247738_at   | At5g59210 | Myosin Heavy Chain-Related                                 | 0.0147 | 0.0266 | 2.57  |
| 264599_at   | At1g04600 | Myosin, Putative                                           | 0.0385 | 0.0434 | 6.36  |
| 260711_at   | At1g17580 | Myosin, Putative                                           | 0.0004 | 0.0050 | 2.55  |
| 246081_s_at | At5g20470 | Myosin, Putative                                           | 0.0406 | 0.0447 | 2.71  |
| 264572_at   | At1g05320 | Myosin-Related                                             | 0.0002 | 0.0033 | 2.53  |
| 256204_at   | At1g50840 | Poli-Like Dna Polymerase, Putative                         | 0.0029 | 0.0125 | 2.79  |
| 264077_at   | At2g28560 | Protein of the RAD51B family                               | 0.0214 | 0.0320 | 4.57  |
| 246500_at   | At5g16270 | Rad21/Rec8-Like Family Protein                             | 0.0445 | 0.0471 | 5.93  |
| 245054_at   | At2g26460 | Red Family Protein                                         | 0.0246 | 0.0344 | 2.97  |
| 248693_at   | At5g48330 | Regulator Of Chromosome Condensation (Rcc1) Family Protein | 0.0280 | 0.0368 | 3.05  |
| 263532_s_at | At5g37350 | Rio1 Family Protein                                        | 0.0017 | 0.0098 | 3.09  |
| 245917_at   | At5g28740 | Transcription-Coupled Dna Repair Protein-Related           | 0.0000 | 0.0011 | 2.60  |
| 261129_at   | At1g04820 | Tubulin Alpha-2/Alpha-4 Chain (Tua4)                       | 0.0003 | 0.0040 | 3.05  |
| 245915_s_at | At5g19770 | Tubulin Alpha-3/Alpha-5 Chain (Tua3)                       | 0.0024 | 0.0112 | 4.67  |
| 247442_s_at | At5g62690 | Tubulin Beta-2/Beta-3 Chain (Tub2)                         | 0.0069 | 0.0181 | 5.37  |
| 250317_at   | At5g12250 | Tubulin Beta-6 Chain (Tub6)                                | 0.0243 | 0.0342 | 2.59  |

#### D. Development/storage proteins

|             |           |                                                                            |        |        |       |
|-------------|-----------|----------------------------------------------------------------------------|--------|--------|-------|
| 265095_at   | At1g03880 | 12S Seed Storage Protein (Crb)                                             | 0.0206 | 0.0314 | 5.46  |
| 245492_at   | At4g16340 | Adapter Protein Spike1 (Spk1)                                              | 0.0274 | 0.0364 | 2.56  |
| 258392_at   | At3g15400 | Anther Development Protein, Putative                                       | 0.0052 | 0.0161 | 3.69  |
| 264113_at   | At2g31260 | Autophagy 9 (Apg9)                                                         | 0.0330 | 0.0399 | 2.51  |
| 254780_s_at | At4g12770 | Auxilin-Related                                                            | 0.0135 | 0.0256 | 2.67  |
| 247468_at   | At5g62010 | Auxin response transcription factor                                        | 0.0133 | 0.0254 | 2.86  |
| 259128_at   | At3g02260 | Auxin Transport Protein (Big)                                              | 0.0047 | 0.0153 | 3.90  |
| 266300_at   | At2g01420 | Auxin Transport Protein, Putative                                          | 0.0029 | 0.0125 | 2.84  |
| 262914_at   | At1g59750 | Auxin-Responsive Transcription Factor (Arf1)                               | 0.0090 | 0.0208 | 3.17  |
| 267452_at   | At2g33860 | Auxin-Responsive Transcription Factor (Arf3) / Ettin Protein (Ett)         | 0.0223 | 0.0327 | 6.97  |
| 256311_at   | At1g30330 | Auxin-Responsive Transcription Factor (Arf6)                               | 0.0338 | 0.0405 | 4.52  |
| 245971_at   | At5g20730 | Auxin-Responsive Transcription Factor (Arf7)                               | 0.0019 | 0.0102 | 5.85  |
| 254194_at   | At4g23980 | Auxin-Responsive Transcription Factor (Arf9)                               | 0.0061 | 0.0173 | 5.27  |
| 266611_at   | At2g14960 | Auxin-Responsive Gh3 Family Protein                                        | 0.0001 | 0.0029 | 6.63  |
| 259018_at   | At3g07390 | Auxin-Responsive Protein / Auxin-Induced Protein (Air12)                   | 0.0469 | 0.0483 | 3.53  |
| 264021_at   | At2g21200 | Auxin-Responsive Protein, Putative                                         | 0.0068 | 0.0181 | 6.51  |
| 254746_at   | At4g12980 | Auxin-Responsive Protein, Putative                                         | 0.0087 | 0.0204 | 8.24  |
| 252431_at   | At3g47700 | Chromosome Structural Maintenance Protein-Related                          | 0.0286 | 0.0372 | 3.43  |
| 261415_at   | At1g07750 | Cupin Family Protein                                                       | 0.0013 | 0.0085 | 3.50  |
| 249193_at   | At5g42480 | DnaJ Plastid Division Protein (Arc6)                                       | 0.0001 | 0.0019 | 3.89  |
| 245668_at   | At1g28330 | Dormancy-Associated Protein, Putative (Drm1)                               | 0.0103 | 0.0222 | 20.35 |
| 266368_at   | At2g41380 | Embryo-Abundant Protein-Related                                            | 0.0003 | 0.0043 | 4.02  |
| 265896_at   | At2g25660 | Embryonic development                                                      | 0.0009 | 0.0073 | 2.59  |
| 246476_at   | At5g16730 | Embryonic development                                                      | 0.0046 | 0.0152 | 5.57  |
| 257922_at   | At3g23150 | Ethylene Receptor, Putative (Etr2)                                         | 0.0028 | 0.0120 | 6.23  |
| 250928_at   | At5g03280 | Ethylene-Insensitive 2 (Ein2)                                              | 0.0000 | 0.0006 | 3.40  |
| 245256_at   | At4g15090 | Far-Red Impaired Response Protein (Far1) C462                              | 0.0023 | 0.0111 | 38.77 |
| 259259_at   | At3g11540 | Gibberellin Signal Transduction Protein (Spindly)                          | 0.0006 | 0.0063 | 2.59  |
| 246550_at   | At5g14920 | Gibberellin-Regulated Family Protein                                       | 0.0312 | 0.0388 | 3.04  |
| 255049_at   | At4g09610 | Gibberellin-Regulated Protein 2 (Gasa2) / Gibberellin-Responsive Protein 2 | 0.0434 | 0.0464 | 4.80  |
| 255128_at   | At4g08310 | Glutamic acid-rich protein                                                 | 0.0043 | 0.0148 | 5.07  |
| 251678_at   | At3g56990 | Glycine-Rich Protein                                                       | 0.0398 | 0.0442 | 3.68  |
| 253754_at   | At4g29020 | Glycine-Rich Protein                                                       | 0.0090 | 0.0207 | 3.40  |
| 253347_at   | At4g33610 | Glycine-Rich Protein                                                       | 0.0218 | 0.0323 | 6.39  |
| 250355_at   | At5g11700 | Glycine-Rich Protein                                                       | 0.0061 | 0.0173 | 4.57  |
| 258240_at   | At3g27660 | Glycine-Rich Protein / Oleosin                                             | 0.0455 | 0.0477 | 5.25  |

|                        |           |                                                                                                |        |        |       |
|------------------------|-----------|------------------------------------------------------------------------------------------------|--------|--------|-------|
| 249353_at              | At5g40420 | Glycine-Rich Protein / Oleosin                                                                 | 0.0060 | 0.0172 | 7.62  |
| 251390_at              | At3g60860 | Guanine Nucleotide Exchange Family Protein                                                     | 0.0002 | 0.0032 | 3.05  |
| 261621_at              | At1g01960 | Guanine Nucleotide Exchange Family Protein                                                     | 0.0123 | 0.0245 | 2.84  |
| 266905_at              | At2g34560 | Katanin, Putative                                                                              | 0.0021 | 0.0105 | 2.96  |
| 252019_at              | At3g53040 | Late Embryogenesis Abundant Protein, Putative / Lea Protein, Putative                          | 0.0052 | 0.0161 | 3.35  |
| 262128_at              | At1g52690 | Late Embryogenesis Abundant Protein, Putative / Lea Protein, Putative                          | 0.0245 | 0.0343 | 8.97  |
| 262976_at              | At1g75520 | Lateral Root Primordium (Lrp) Protein-Related                                                  | 0.0065 | 0.0178 | 4.94  |
| 264145_at              | At1g79310 | Latex-Abundant Protein, Putative (Amc4) / Caspase Family Protein                               | 0.0005 | 0.0056 | 6.88  |
| 247565_at              | At5g61150 | Leo1-Like Family Protein                                                                       | 0.0069 | 0.0181 | 2.72  |
| 263865_at              | At2g36910 | Multidrug Resistance P-Glycoprotein (Pgp1)                                                     | 0.0001 | 0.0022 | 4.32  |
| 254034_at              | At4g25960 | Multidrug Resistance P-Glycoprotein, Putative                                                  | 0.0202 | 0.0311 | 2.73  |
| 257137_at              | At3g28860 | Multidrug Resistance P-Glycoprotein, Putative                                                  | 0.0085 | 0.0201 | 4.10  |
| 259579_at              | At1g28010 | Multidrug Resistance P-Glycoprotein, Putative                                                  | 0.0300 | 0.0381 | 3.11  |
| 247084_at              | At5g66300 | No Apical Meristem (Nam) Family Protein                                                        | 0.0004 | 0.0050 | 6.44  |
| 248240_at              | At5g53950 | No Apical Meristem (Nam) Family Protein                                                        | 0.0000 | 0.0017 | 7.92  |
| 249944_at              | At5g22290 | No Apical Meristem (Nam) Family Protein                                                        | 0.0009 | 0.0073 | 3.04  |
| 262514_at              | At1g34190 | No Apical Meristem (Nam) Family Protein                                                        | 0.0061 | 0.0173 | 2.84  |
| 260288_at              | At1g80530 | Nodulin Family Protein                                                                         | 0.0116 | 0.0236 | 3.76  |
| 248804_at              | At5g47470 | Nodulin Mtn21 Family Protein                                                                   | 0.0364 | 0.0421 | 4.06  |
| 249397_at              | At5g40230 | Nodulin-Related                                                                                | 0.0128 | 0.0250 | 8.95  |
| 267044_at              | At2g34350 | Nodulin-Related                                                                                | 0.0443 | 0.0470 | 8.18  |
| 247157_at              | At5g65770 | Nuclear Matrix Constituent Protein-Related                                                     | 0.0304 | 0.0384 | 8.83  |
| 262773_at              | At1g13220 | Nuclear Matrix Constituent Protein-Related                                                     | 0.0115 | 0.0235 | 4.72  |
| 257000_at              | At3g14120 | Nuclear pore complex protein NUP 107                                                           | 0.0151 | 0.0270 | 2.72  |
| 250769_at              | At5g05680 | Nuclear Pore Complex Protein-Related                                                           | 0.0004 | 0.0048 | 2.88  |
| 265724_at              | At2g32100 | Ovate Protein-Related                                                                          | 0.0149 | 0.0269 | 3.02  |
| 261395_at              | At1g79700 | Ovule Development Protein, Putative                                                            | 0.0489 | 0.0495 | 3.34  |
| 262316_at              | At2g48120 | Pale Cress Protein (Pac)                                                                       | 0.0452 | 0.0475 | 5.29  |
| 252985_at              | At4g38350 | Patched Family Protein                                                                         | 0.0026 | 0.0117 | 2.75  |
| 262614_at              | At1g13980 | Pattern Formation Protein (Emb30) (Gnom)                                                       | 0.0007 | 0.0068 | 3.29  |
| 245688_at              | At1g28290 | Pollen Ole E 1 Allergen And Extensin Family Protein                                            | 0.0208 | 0.0316 | 4.06  |
| 265567_at              | At2g05580 | Pseudogene, Glycine-Rich Protein                                                               | 0.0059 | 0.0170 | 5.18  |
| 257350_x_at            | At2g19040 | Rapid Alkalinization Factor (Ralf) Family Protein                                              | 0.0358 | 0.0417 | 3.89  |
| 258432_at              | At3g16570 | Rapid Alkalinization Factor (Ralf) Family Protein                                              | 0.0057 | 0.0169 | 4.81  |
| 257606_at              | At3g13870 | Root Hair Defective 3 (Rhd3)                                                                   | 0.0005 | 0.0058 | 4.96  |
| 254166_at              | At4g24190 | Shepherd Protein (Shd) / Clavata Formation Protein, Putative                                   | 0.0175 | 0.0290 | 5.51  |
| 246628_at              | At1g48900 | Signal Recognition Particle 54 Kda Protein 3 / Srp54 (Srp-54C)                                 | 0.0004 | 0.0053 | 2.89  |
| 250884_at              | At5g03940 | Signal Recognition Particle 54 Kda Protein, Chloroplast / 54 Chloroplast Protein / Srp54 (Ffc) | 0.0026 | 0.0117 | 2.57  |
| 247505_at              | At5g61970 | Signal Recognition Particle-Related / Srp-Related                                              | 0.0059 | 0.0170 | 2.54  |
| 245712_at              | At5g04360 | Starch Debranching Enzyme, Putative                                                            | 0.0447 | 0.0472 | 3.31  |
| 262784_at              | At1g10760 | Starch Excess Protein (Sex1)                                                                   | 0.0002 | 0.0039 | 3.72  |
| 260751_at              | At1g49040 | Stomatal Cytokinesis Defective / Scd1 Protein (Scd1)                                           | 0.0062 | 0.0173 | 2.52  |
| 255432_at              | At4g03330 | Syntaxin, Putative (Syp123)                                                                    | 0.0042 | 0.0146 | 8.78  |
| 254465_at              | At4g20420 | Tapetum-Specific Protein-Related                                                               | 0.0354 | 0.0415 | 3.80  |
| 266673_at              | At2g29630 | Thiamine Biosynthesis Family Protein / Thic Family Protein                                     | 0.0055 | 0.0166 | 2.78  |
| 266463_at              | At2g47840 | Tic20 Protein-Related                                                                          | 0.0001 | 0.0028 | 4.35  |
| 249739_at              | At5g24520 | Transparent Testa Glabra 1 Protein (Ttg1)                                                      | 0.0443 | 0.0470 | 4.61  |
| 257221_at              | At3g27920 | Trichome Differentiation Protein / Glabrous1 Protein (G11)                                     | 0.0433 | 0.0464 | 2.88  |
| 256655_at              | At3g18890 | UV-B and Ozone similarity regulated protein 1                                                  | 0.0041 | 0.0146 | 4.40  |
| 255510_at              | At4g02020 | Zeste-Like Protein 1 (Eza1)                                                                    | 0.0105 | 0.0224 | 3.09  |
| <b>D1. Chloroplast</b> |           |                                                                                                |        |        |       |
| 250733_at              | At5g06290 | 2-Cys Peroxiredoxin, Chloroplast, Putative                                                     | 0.0334 | 0.0402 | 4.12  |
| 263706_s_at            | At1g31180 | 3-Isopropylmalate Dehydrogenase, Chloroplast, Putative                                         | 0.0021 | 0.0105 | 2.53  |
| 260285_at              | At1g80560 | 3-Isopropylmalate Dehydrogenase, Chloroplast, Putative                                         | 0.0002 | 0.0035 | 3.24  |
| 253394_at              | At4g32770 | Chlorophyll metabolic process                                                                  | 0.0004 | 0.0052 | 3.50  |
| 263652_at              | At1g04330 | Chloroplast                                                                                    | 0.0238 | 0.0339 | 2.73  |
| 264728_at              | At1g22850 | Chloroplast                                                                                    | 0.0317 | 0.0391 | 3.38  |
| 263014_at              | At1g23400 | Chloroplast                                                                                    | 0.0100 | 0.0219 | 4.30  |
| 262738_at              | At1g28530 | Chloroplast                                                                                    | 0.0103 | 0.0222 | 17.05 |
| 259818_at              | At1g49890 | Chloroplast                                                                                    | 0.0043 | 0.0148 | 2.74  |
| 261853_at              | At1g50660 | Chloroplast                                                                                    | 0.0188 | 0.0300 | 3.86  |
| 260167_at              | At1g71970 | Chloroplast                                                                                    | 0.0386 | 0.0435 | 3.46  |
| 265596_at              | At2g20020 | Chloroplast                                                                                    | 0.0000 | 0.0005 | 5.68  |
| 266551_at              | At2g35260 | Chloroplast                                                                                    | 0.0014 | 0.0089 | 2.86  |
| 266100_at              | At2g37980 | Chloroplast                                                                                    | 0.0088 | 0.0205 | 3.98  |
| 266128_at              | At2g45000 | Chloroplast                                                                                    | 0.0410 | 0.0449 | 4.23  |
| 260580_at              | At2g47390 | Chloroplast                                                                                    | 0.0063 | 0.0175 | 5.95  |
| 258800_at              | At3g04550 | Chloroplast                                                                                    | 0.0054 | 0.0163 | 2.64  |
| 258802_at              | At3g04650 | Chloroplast                                                                                    | 0.0161 | 0.0279 | 5.82  |
| 256784_at              | At3g13674 | Chloroplast                                                                                    | 0.0022 | 0.0108 | 4.27  |
| 258397_at              | At3g15357 | Chloroplast                                                                                    | 0.0223 | 0.0328 | 11.29 |
| 257717_at              | At3g18390 | Chloroplast                                                                                    | 0.0025 | 0.0116 | 3.77  |
| 258256_at              | At3g26890 | Chloroplast                                                                                    | 0.0020 | 0.0104 | 3.66  |

|           |           |                                                         |        |        |       |
|-----------|-----------|---------------------------------------------------------|--------|--------|-------|
| 251828_at | At3g55070 | Chloroplast                                             | 0.0054 | 0.0163 | 2.50  |
| 251741_at | At3g56040 | Chloroplast                                             | 0.0028 | 0.0120 | 2.63  |
| 254631_at | At4g18610 | Chloroplast                                             | 0.0042 | 0.0146 | 15.43 |
| 254580_at | At4g19390 | Chloroplast                                             | 0.0471 | 0.0484 | 3.15  |
| 254522_at | At4g19980 | Chloroplast                                             | 0.0027 | 0.0120 | 3.73  |
| 253978_at | At4g26660 | Chloroplast                                             | 0.0113 | 0.0233 | 6.18  |
| 253686_at | At4g29750 | Chloroplast                                             | 0.0061 | 0.0173 | 4.03  |
| 252979_at | At4g38225 | Chloroplast                                             | 0.0449 | 0.0474 | 2.59  |
| 250290_at | At5g13310 | Chloroplast                                             | 0.0102 | 0.0221 | 3.14  |
| 250295_at | At5g13390 | Chloroplast                                             | 0.0430 | 0.0462 | 3.10  |
| 246849_at | At5g26850 | Chloroplast                                             | 0.0083 | 0.0200 | 2.60  |
| 248762_at | At5g47455 | Chloroplast                                             | 0.0229 | 0.0332 | 7.96  |
| 247889_at | At5g57930 | Chloroplast                                             | 0.0051 | 0.0160 | 3.53  |
| 247770_at | At5g58930 | Chloroplast                                             | 0.0033 | 0.0133 | 2.50  |
| 259508_at | At1g43920 | Chloroplast                                             | 0.0000 | 0.0008 | 6.80  |
| 246811_at | At5g27170 | Chloroplast                                             | 0.0280 | 0.0368 | 3.16  |
| 255474_at | At4g02470 | Chloroplast Atpase activity                             | 0.0010 | 0.0074 | 3.18  |
| 257218_at | At3g15000 | Chloroplast differentiation and Palisade development    | 0.0309 | 0.0387 | 3.32  |
| 260815_at | At1g06950 | Chloroplast Inner Envelope Protein-Related              | 0.0021 | 0.0106 | 3.69  |
| 264672_at | At1g09750 | Chloroplast Nucleoid Dna-Binding Protein-Related        | 0.0011 | 0.0079 | 4.53  |
| 252492_at | At3g46740 | Chloroplast Outer Envelope Protein, Putative            | 0.0080 | 0.0197 | 3.61  |
| 255482_at | At4g02510 | Chloroplast Outer Membrane Protein, Putative            | 0.0009 | 0.0073 | 5.85  |
| 265412_at | At2g16640 | Chloroplast Outer Membrane Protein, Putative            | 0.0006 | 0.0060 | 26.90 |
| 245123_at | At2g47450 | Chloroplast Signal Recognition Particle Component (Cao) | 0.0091 | 0.0209 | 3.32  |
| 261488_at | At1g14345 | Chloroplast thylakoid membrane                          | 0.0062 | 0.0174 | 3.02  |
| 249808_at | At5g23890 | Chloroplast thylakoid membrane                          | 0.0136 | 0.0257 | 3.50  |
| 266957_at | At2g34640 | Plastid chromosome                                      | 0.0000 | 0.0012 | 8.11  |
| 252441_at | At3g46780 | Plastid chromosome                                      | 0.0011 | 0.0080 | 5.80  |
| 266638_at | At2g35490 | Plastid-Lipid Associated Protein Pap, Putative          | 0.0047 | 0.0154 | 2.92  |
| 250058_at | At5g17870 | Plastid-Specific Ribosomal Protein-Related              | 0.0208 | 0.0316 | 3.03  |

#### E. Metabolism

##### E1. Carbohydrate/soluble sugar/starch/aminoacid metabolism

|             |           |                                                                               |        |        |      |
|-------------|-----------|-------------------------------------------------------------------------------|--------|--------|------|
| 250906_at   | At5g03650 | 1,4-Alpha-Glucan Branching Enzyme / Starch Branching Enzyme Class Ii (Sbe2-2) | 0.0012 | 0.0083 | 2.57 |
| 264346_at   | At1g12010 | 1-Aminocyclopropane-1-Carboxylate Oxidase, Putative / Acc Oxidase, Putative   | 0.0191 | 0.0302 | 3.58 |
| 260637_at   | At1g62380 | 1-Aminocyclopropane-1-Carboxylate Oxidase, Putative / Acc Oxidase, Putative   | 0.0008 | 0.0070 | 2.62 |
| 249866_at   | At5g23010 | 2-Isopropylmalate Synthase 3 (Ims3)                                           | 0.0003 | 0.0046 | 2.55 |
| 261668_at   | At1g18500 | 2-Isopropylmalate Synthase, Putative                                          | 0.0114 | 0.0235 | 3.39 |
| 252325_at   | At3g48560 | Acetolactate Synthase / Acetohydroxy-Acid Synthase (Als)                      | 0.0011 | 0.0078 | 3.19 |
| 250111_at   | At5g16290 | Acetolactate Synthase Small Subunit, Putative                                 | 0.0014 | 0.0088 | 4.34 |
| 260286_at   | At1g80600 | Acetylornithine Aminotransferase, Mitochondrial, Putative                     | 0.0005 | 0.0055 | 3.02 |
| 264911_at   | At1g60690 | Aldo/Keto Reductase Family Protein                                            | 0.0011 | 0.0078 | 3.03 |
| 267168_at   | At2g37770 | Aldo/Keto Reductase Family Protein                                            | 0.0221 | 0.0325 | 3.18 |
| 250186_at   | At5g14500 | Aldose 1-Epimerase Family Protein                                             | 0.0133 | 0.0254 | 3.02 |
| 251642_at   | At3g57520 | Alkaline Alpha Galactosidase, Putative                                        | 0.0144 | 0.0263 | 4.53 |
| 260169_at   | At1g71990 | Alpha-(1,4)-Fucosyltransferase                                                | 0.0077 | 0.0193 | 6.61 |
| 260412_at   | At1g69830 | Alpha-Amylase, Putative / 1,4-Alpha-D-Glucan Glucanohydrolase, Putative       | 0.0335 | 0.0402 | 2.62 |
| 250336_at   | At5g11720 | Alpha-Glucosidase 1 (Aglu1)                                                   | 0.0107 | 0.0226 | 4.95 |
| 247298_at   | At5g63840 | Alpha-Glucosidase, Putative                                                   | 0.0015 | 0.0092 | 3.26 |
| 262230_at   | At1g68560 | Alpha-Xylosidase (Xyl1)                                                       | 0.0202 | 0.0311 | 5.52 |
| 252967_at   | At4g38880 | Amidophosphoribosyltransferase, Putative                                      | 0.0401 | 0.0443 | 2.54 |
| 246389_at   | At1g77380 | Amino Acid Carrier, Putative / Amino Acid Permease, Putative                  | 0.0015 | 0.0091 | 8.24 |
| 265790_at   | At2g01170 | Amino Acid Permease Family Protein                                            | 0.0001 | 0.0029 | 2.65 |
| 251133_at   | At5g01240 | Amino Acid Permease, Putative                                                 | 0.0495 | 0.0498 | 2.80 |
| 264394_at   | At1g11860 | Aminomethyltransferase, Putative                                              | 0.0041 | 0.0146 | 2.62 |
| 253360_at   | At4g33090 | Aminopeptidase M                                                              | 0.0078 | 0.0194 | 3.71 |
| 259296_at   | At3g05350 | Aminopeptidase P, Cytosolic, Putative                                         | 0.0020 | 0.0105 | 2.51 |
| 247916_at   | At5g57590 | Aminotransferase Class Iii Family Protein                                     | 0.0140 | 0.0260 | 6.08 |
| 263714_at   | At2g20610 | Aminotransferase, Putative                                                    | 0.0306 | 0.0385 | 4.41 |
| 265965_at   | At2g37500 | Arginine Biosynthesis Protein Argj Family                                     | 0.0000 | 0.0017 | 2.67 |
| 253203_at   | At4g34710 | Arginine Decarboxylase 2 (Spe2)                                               | 0.0155 | 0.0274 | 2.97 |
| 250403_at   | At5g10920 | Argininosuccinate Lyase, Putative / Argininosuccinase, Putative               | 0.0032 | 0.0129 | 2.98 |
| 254134_at   | At4g24830 | Argininosuccinate Synthase Family                                             | 0.0004 | 0.0048 | 3.35 |
| 247218_at   | At5g65010 | Asparagine Synthetase 2 (Asn2)                                                | 0.0000 | 0.0019 | 3.66 |
| 245951_at   | At5g19550 | Aspartate Aminotransferase, Cytoplasmic Isozyme 1 / Transaminase A (Asp2)     | 0.0251 | 0.0348 | 2.99 |
| 258977_s_at | At3g02020 | Aspartate Kinase, Lysine-Sensitive, Putative                                  | 0.0262 | 0.0356 | 2.99 |
| 245346_at   | At4g17090 | Beta-Amylase (Ct-Bmy) / 1,4-Alpha-D-Glucan Maltotrihydrolase                  | 0.0143 | 0.0263 | 3.88 |
| 256861_at   | At3g23920 | Beta-Amylase, Putative / 1,4-Alpha-D-Glucan Maltotrihydrolase, Putative       | 0.0159 | 0.0277 | 3.40 |
| 262038_at   | At1g35580 | Beta-Fructofuranosidase, Putative / Invertase, Putative                       | 0.0347 | 0.0411 | 2.67 |
| 258732_at   | At3g05820 | Beta-Fructofuranosidase, Putative / Invertase, Putative                       | 0.0161 | 0.0279 | 8.86 |
| 265118_at   | At1g62660 | Beta-Fructosidase (Bfruct3) / Beta-Fructofuranosidase / Invertase, Vacuolar   | 0.0137 | 0.0257 | 4.47 |
| 260969_at   | At1g12240 | Beta-Fructosidase (Bfruct4) / Beta-Fructofuranosidase / Invertase, Vacuolar   | 0.0457 | 0.0478 | 3.10 |
| 264078_at   | At2g28470 | Beta-Galactosidase, Putative / Lactase, Putative                              | 0.0145 | 0.0264 | 2.60 |
| 267556_at   | At2g32810 | Beta-Galactosidase, Putative / Lactase, Putative                              | 0.0184 | 0.0297 | 4.79 |



|             |           |                                                                                  |        |        |       |
|-------------|-----------|----------------------------------------------------------------------------------|--------|--------|-------|
| 256772_at   | At3g13750 | Beta-Galactosidase, Putative / Lactase, Putative                                 | 0.0002 | 0.0037 | 2.73  |
| 253090_at   | At4g36360 | Beta-Galactosidase, Putative / Lactase, Putative                                 | 0.0299 | 0.0381 | 5.31  |
| 267377_at   | At2g26250 | Beta-Ketoacyl-Coa Synthase Family (Fiddlehead) (Fdh)                             | 0.0025 | 0.0117 | 4.36  |
| 267606_at   | At2g26640 | Beta-Ketoacyl-Coa Synthase, Putative                                             | 0.0041 | 0.0145 | 2.82  |
| 263696_at   | At1g31230 | Bifunctional Aspartate Kinase/Homoserine Dehydrogenase / Ak-Hsdh                 | 0.0004 | 0.0048 | 4.61  |
| 261636_at   | At1g50110 | Branched-Chain Amino Acid Aminotransferase 6                                     | 0.0048 | 0.0155 | 6.15  |
| 256002_at   | At1g29900 | Carbamoyl-Phosphate Synthase Family Protein                                      | 0.0013 | 0.0086 | 4.75  |
| 261505_at   | At1g71696 | Carboxypeptidase D, Putative                                                     | 0.0002 | 0.0034 | 4.42  |
| 252886_at   | At4g39350 | Cellulose Synthase, Catalytic Subunit (Ath-A)                                    | 0.0095 | 0.0213 | 3.03  |
| 250827_at   | At5g05170 | Cellulose Synthase, Catalytic Subunit (Ath-B)                                    | 0.0177 | 0.0291 | 3.25  |
| 254618_at   | At4g18780 | Cellulose Synthase, Catalytic Subunit (Irx1)                                     | 0.0001 | 0.0023 | 12.31 |
| 253428_at   | At4g32410 | Cellulose Synthase, Catalytic Subunit, Putative                                  | 0.0189 | 0.0300 | 4.05  |
| 261957_at   | At1g64660 | Cys/Met Metabolism Pyridoxal-Phosphate-Dependent Enzyme Family Protein           | 0.0124 | 0.0245 | 8.49  |
| 259172_at   | At3g03630 | Cysteine Synthase, Putative / O-Acetylserine (Thiol)-Lyase, Putative             | 0.0102 | 0.0220 | 8.73  |
| 262460_s_at | At1g50390 | Fructokinase-Related                                                             | 0.0041 | 0.0145 | 6.26  |
| 247278_at   | At5g64380 | Fructose-1,6-Bisphosphatase Family Protein                                       | 0.0091 | 0.0208 | 2.77  |
| 251885_at   | At3g54050 | Fructose-1,6-Bisphosphatase, Putative                                            | 0.0137 | 0.0257 | 2.53  |
| 256036_at   | At1g07110 | Fructose-6-Phosphate 2-Kinase / Fructose-2,6-Bisphosphatase (F2Kp)               | 0.0173 | 0.0287 | 2.78  |
| 245060_at   | At2g39770 | Gdp-Mannose Pyrophosphorylase (Gmp1)                                             | 0.0056 | 0.0167 | 5.34  |
| 256746_at   | At3g29320 | Glucan Phosphorylase, Putative                                                   | 0.0492 | 0.0496 | 2.85  |
| 256098_at   | At1g13700 | Glucosamine/Galactosamine-6-Phosphate Isomerase Family Protein                   | 0.0003 | 0.0048 | 33.29 |
| 248687_at   | At5g48300 | Glucose-1-Phosphate Adenylyltransferase Small Subunit 1 (Aps1)                   | 0.0000 | 0.0017 | 3.07  |
| 264859_at   | At1g24280 | Glucose-6-Phosphate 1-Dehydrogenase, Putative / G6Pd, Putative                   | 0.0050 | 0.0158 | 2.52  |
| 254141_at   | At4g24620 | Glucose-6-Phosphate Isomerase, Putative                                          | 0.0004 | 0.0051 | 2.83  |
| 246445_at   | At5g17630 | Glucose-6-Phosphate/Phosphate Translocator, Putative                             | 0.0136 | 0.0257 | 3.55  |
| 251746_at   | At3g56060 | Glucose-Methanol-Choline (Gmc) Oxidoreductase Family Protein                     | 0.0146 | 0.0265 | 2.64  |
| 245701_at   | At5g04140 | Glutamate Synthase (Glu1) / Ferredoxin-Dependent Glutamate Synthase (Fd-Gogat 1) | 0.0007 | 0.0068 | 2.90  |
| 248267_at   | At5g53460 | Glutamate Synthase (Nadh), Chloroplast, Putative                                 | 0.0000 | 0.0003 | 5.32  |
| 266365_at   | At2g41220 | Glutamate Synthase, Chloroplast (Glu2)                                           | 0.0006 | 0.0061 | 4.57  |
| 258160_at   | At3g17820 | Glutamine Synthetase (Gsl)                                                       | 0.0077 | 0.0193 | 4.01  |
| 251860_at   | At3g54660 | Glutathione Reductase, Chloroplast                                               | 0.0362 | 0.0420 | 2.76  |
| 258588_s_at | At3g04120 | Glyceraldehyde-3-Phosphate Dehydrogenase, Cytosolic (Gapc)                       | 0.0167 | 0.0282 | 3.52  |
| 260014_at   | At1g68010 | Glycerate Dehydrogenase / Nadh-Dependent Hydroxypyruvate Reductase               | 0.0002 | 0.0037 | 2.53  |
| 260274_at   | At1g80460 | Glycerol Kinase, Putative                                                        | 0.0101 | 0.0219 | 2.95  |
| 266892_at   | At2g26080 | Glycine Dehydrogenase (Decarboxylating), Putative                                | 0.0153 | 0.0273 | 6.53  |
| 253387_at   | At4g33010 | Glycine Dehydrogenase (Decarboxylating), Putative                                | 0.0020 | 0.0104 | 4.58  |
| 254740_s_at | At4g13890 | Glycine Hydroxymethyltransferase, Putative                                       | 0.0295 | 0.0378 | 3.30  |
| 258359_s_at | At3g14415 | Glycolate Oxidase, Putative                                                      | 0.0186 | 0.0299 | 2.79  |
| 255814_at   | At1g19900 | Glyoxal Oxidase-Related                                                          | 0.0001 | 0.0027 | 3.98  |
| 262972_at   | At1g75620 | Glyoxal Oxidase-Related                                                          | 0.0352 | 0.0414 | 2.54  |
| 251175_at   | At3g63250 | Homocysteine S-Methyltransferase 2 (Hmt-2)                                       | 0.0078 | 0.0193 | 3.56  |
| 264360_at   | At1g03310 | Isoamylase, Putative / Starch Debranching Enzyme, Putative                       | 0.0053 | 0.0163 | 2.99  |
| 250197_at   | At5g14590 | Iscitrate Dehydrogenase, Putative / Nadp+ Isocitrate Dehydrogenase, Putative     | 0.0013 | 0.0084 | 3.50  |
| 250770_at   | At5g05390 | Laccase, Putative / Diphenol Oxidase, Putative                                   | 0.0316 | 0.0390 | 8.23  |
| 264372_at   | At1g11840 | Lactoylglutathione Lyase, Putative / Glyoxalase I, Putative                      | 0.0014 | 0.0089 | 2.62  |
| 252376_at   | At3g47930 | L-Galactono-1,4-Lactone Dehydrogenase, Putative                                  | 0.0005 | 0.0055 | 2.78  |
| 245324_at   | At4g17260 | L-Lactate Dehydrogenase, Putative                                                | 0.0138 | 0.0257 | 3.40  |
| 263663_at   | At1g04410 | Malate Dehydrogenase, Cytosolic, Putative                                        | 0.0153 | 0.0273 | 2.53  |
| 261355_at   | At1g79750 | Malate Oxidoreductase, Putative                                                  | 0.0063 | 0.0174 | 2.97  |
| 248576_at   | At5g49810 | Methionine S-Methyltransferase                                                   | 0.0380 | 0.0432 | 2.78  |
| 258416_at   | At3g17310 | Methyltransferase Family Protein                                                 | 0.0056 | 0.0167 | 22.19 |
| 253585_at   | At4g30720 | Monoxygenase                                                                     | 0.0005 | 0.0056 | 5.18  |
| 258218_at   | At3g18000 | Phosphoethanolamine N-Methyltransferase 1 / Peamt 1 (Nmt1)                       | 0.0186 | 0.0299 | 2.73  |
| 259842_at   | At1g73600 | Phosphoethanolamine N-Methyltransferase 3, Putative (Nmt3)                       | 0.0000 | 0.0004 | 2.88  |
| 249411_at   | At5g40390 | Raffinose Synthase Family Protein                                                | 0.0081 | 0.0198 | 2.55  |
| 249827_at   | At5g23330 | Riboflavin Biosynthesis Protein-Related                                          | 0.0004 | 0.0051 | 9.31  |
| 263882_at   | At2g21790 | Ribonucleoside-Diphosphate Reductase Small Chain, Putative                       | 0.0009 | 0.0072 | 2.70  |
| 267365_at   | At2g44530 | Ribose-Phosphate Pyrophosphokinase, Putative                                     | 0.0022 | 0.0107 | 2.70  |
| 245061_at   | At2g39730 | Ribulose Bisphosphate Carboxylase/Oxygenase Activase / Rubisco Activase          | 0.0160 | 0.0278 | 4.11  |
| 249599_at   | At5g37990 | S-Adenosyl-L-Methionine:Carboxyl Methyltransferase Family Protein                | 0.0126 | 0.0247 | 7.71  |
| 256375_at   | At1g66720 | S-Adenosyl-L-Methionine:Carboxyl Methyltransferase Family Protein                | 0.0194 | 0.0304 | 6.49  |
| 260913_at   | At1g02500 | S-Adenosylmethionine Synthetase 1 (Sam1)                                         | 0.0410 | 0.0449 | 7.35  |
| 255552_at   | At4g01850 | S-Adenosylmethionine Synthetase 2 (Sam2)                                         | 0.0025 | 0.0115 | 2.82  |
| 249854_at   | At5g22960 | Serine Carboxypeptidase S10 Family Protein                                       | 0.0132 | 0.0253 | 14.41 |
| 252468_at   | At3g46970 | Starch Phosphorylase, Putative                                                   | 0.0331 | 0.0399 | 3.10  |
| 249785_at   | At5g24300 | Starch Synthase, Putative                                                        | 0.0072 | 0.0187 | 5.67  |
| 254659_at   | At4g18240 | Starch Synthase-Related Protein                                                  | 0.0457 | 0.0478 | 12.97 |
| 245998_at   | At5g20830 | Sucrose Synthase / Sucrose-Udp Glucosyltransferase (Sus1)                        | 0.0037 | 0.0139 | 4.16  |
| 260517_at   | At1g51420 | Sucrose-Phosphatase, Putative                                                    | 0.0055 | 0.0165 | 11.14 |
| 255016_at   | At4g10120 | Sucrose-Phosphate Synthase, Putative                                             | 0.0009 | 0.0072 | 4.10  |
| 246076_at   | At5g20280 | Sucrose-Phosphate Synthase, Putative                                             | 0.0025 | 0.0115 | 4.01  |
| 253700_at   | At4g29840 | Threonine Synthase, Chloroplast                                                  | 0.0149 | 0.0269 | 4.95  |
| 262380_at   | At1g72810 | Threonine Synthase, Putative                                                     | 0.0018 | 0.0100 | 3.83  |
| 260059_at   | At1g78090 | Trehalose-6-Phosphate Phosphatase (Tppb)                                         | 0.0049 | 0.0157 | 3.94  |

|           |           |                                                                    |        |        |      |
|-----------|-----------|--------------------------------------------------------------------|--------|--------|------|
| 249515_at | At5g38530 | Tryptophan Synthase-Related                                        | 0.0004 | 0.0050 | 5.85 |
| 256745_at | At3g29360 | UDP-Glucose 6-Dehydrogenase, Putative                              | 0.0485 | 0.0493 | 2.74 |
| 246511_at | At5g15490 | UDP-Glucose 6-Dehydrogenase, Putative                              | 0.0279 | 0.0367 | 5.87 |
| 258556_at | At3g07020 | UDP-Glucose:Sterol Glucosyltransferase (Ugt80A2)                   | 0.0064 | 0.0177 | 2.93 |
| 253386_at | At4g33030 | UDP-Sulfoquinovose Synthase / Sulfite:Udp-Glucose Sulfotransferase | 0.0087 | 0.0203 | 2.80 |
| 250074_at | At5g17310 | UTP--Glucose-1-Phosphate Uridyltransferase, Putative               | 0.0054 | 0.0164 | 3.02 |
| 258849_at | At3g03250 | UTP--Glucose-1-Phosphate Uridyltransferase, Putative               | 0.0329 | 0.0398 | 3.41 |
| 263773_at | At2g21370 | Xylulose Kinase, Putative                                          | 0.0410 | 0.0449 | 4.77 |

#### E2. Primary /secondary metabolism

|             |           |                                                                                 |        |        |       |
|-------------|-----------|---------------------------------------------------------------------------------|--------|--------|-------|
| 247637_at   | At5g60600 | 1-Hydroxy-2-Methyl-2-(E)-Butenyl 4-Diphosphate Synthase, Putative               | 0.0108 | 0.0227 | 3.28  |
| 264668_at   | At1g09780 | 2,3-Biphosphoglycerate-Independent Phosphoglycerate Mutase, Putative            | 0.0000 | 0.0008 | 2.87  |
| 258679_at   | At3g08590 | 2,3-Biphosphoglycerate-Independent Phosphoglycerate Mutase, Putative            | 0.0018 | 0.0098 | 3.72  |
| 253333_at   | At4g33510 | 2-Dehydro-3-Deoxyphosphoheptonate Aldolase 2                                    | 0.0023 | 0.0110 | 3.19  |
| 262638_at   | At1g06650 | 2-Oxoglutarate-Dependent Dioxygenase, Putative                                  | 0.0087 | 0.0204 | 2.63  |
| 255471_at   | At4g03050 | 2-Oxoglutarate-Dependent Dioxygenase, Putative (Aop3)                           | 0.0286 | 0.0372 | 7.06  |
| 257052_at   | At3g15290 | 3-Hydroxybutyryl-Coa Dehydrogenase, Putative                                    | 0.0154 | 0.0273 | 2.88  |
| 248903_at   | At5g46290 | 3-Oxoacyl-(Acyl-Carrier-Protein) Synthase I                                     | 0.0044 | 0.0150 | 3.47  |
| 258964_at   | At3g10540 | 3-Phosphoinositide-Dependent Protein Kinase, Putative                           | 0.0171 | 0.0286 | 8.24  |
| 247216_at   | At5g64860 | 4-Alpha-Glucanotransferase, Putative / Disproportionating Enzyme, Putative      | 0.0437 | 0.0466 | 2.69  |
| 256186_at   | At1g51680 | 4-Coumarate--Coa Ligase 1 / 4-Coumaroyl-Coa Synthase 1 (4C11)                   | 0.0052 | 0.0162 | 3.66  |
| 266574_at   | At2g23890 | 5' Nucleotidase Family Protein                                                  | 0.0116 | 0.0237 | 5.22  |
| 249200_at   | At5g42540 | 5'-3' Exoribonuclease (Xrn2)                                                    | 0.0008 | 0.0069 | 3.98  |
| 255284_at   | At4g04610 | 5'-Adenylylsulfate Reductase (Apr1) / Paps Reductase Homolog (Prh19)            | 0.0018 | 0.0098 | 3.33  |
| 259343_s_at | At3g03780 | 5-Methyltetrahydropteroyltriglutamate--Homocysteine Methyltransferase, Putative | 0.0439 | 0.0467 | 6.92  |
| 256328_at   | At3g02360 | 6-Phosphogluconate Dehydrogenase Family Protein                                 | 0.0058 | 0.0170 | 2.52  |
| 262130_at   | At1g02890 | Aaa-Type Atpase Family Protein                                                  | 0.0283 | 0.0370 | 3.37  |
| 262347_at   | At1g64110 | Aaa-Type Atpase Family Protein                                                  | 0.0005 | 0.0054 | 3.27  |
| 265340_at   | At2g18330 | Aaa-Type Atpase Family Protein                                                  | 0.0053 | 0.0163 | 2.86  |
| 257046_at   | At3g19740 | Aaa-Type Atpase Family Protein                                                  | 0.0182 | 0.0295 | 3.53  |
| 256593_at   | At3g28510 | Aaa-Type Atpase Family Protein                                                  | 0.0276 | 0.0365 | 7.80  |
| 257564_at   | At3g28610 | Aaa-Type Atpase Family Protein                                                  | 0.0035 | 0.0136 | 8.50  |
| 252156_at   | At3g50940 | Aaa-Type Atpase Family Protein                                                  | 0.0240 | 0.0340 | 4.99  |
| 254136_at   | At4g24860 | Aaa-Type Atpase Family Protein                                                  | 0.0286 | 0.0372 | 6.01  |
| 246461_at   | At5g16930 | Aaa-Type Atpase Family Protein                                                  | 0.0015 | 0.0091 | 13.77 |
| 266099_at   | At2g38040 | Acetyl Co-Enzyme A Carboxylase Carboxyltransferase Alpha Subunit Family         | 0.0008 | 0.0071 | 5.46  |
| 263192_at   | At1g36160 | Acetyl-Coa Carboxylase 1 (Acc1)                                                 | 0.0361 | 0.0419 | 8.90  |
| 253135_at   | At4g35830 | Aconitate Hydratase, Cytoplasmic / Citrate Hydro-Lyase / Aconitase (Aco)        | 0.0064 | 0.0176 | 2.72  |
| 263348_at   | At2g05710 | Aconitate Hydratase, Cytoplasmic, Putative                                      | 0.0285 | 0.0371 | 2.82  |
| 253954_at   | At4g26970 | Aconitate Hydratase, Cytoplasmic, Putative                                      | 0.0177 | 0.0291 | 4.57  |
| 260570_at   | At2g43710 | Acyl-(Acyl-Carrier-Protein) Desaturase / Stearoyl-Acp Desaturase (Ssi2)         | 0.0046 | 0.0153 | 3.29  |
| 259647_at   | At1g55320 | Acyl-Activating Enzyme 18 (Aae18)                                               | 0.0276 | 0.0365 | 6.44  |
| 259159_at   | At3g05420 | Acyl-Coa Binding Family Protein                                                 | 0.0061 | 0.0173 | 2.91  |
| 253840_at   | At4g27780 | Acyl-Coa Binding Protein 2 (Acbp2)                                              | 0.0234 | 0.0336 | 4.24  |
| 258524_at   | At3g06810 | Acyl-Coa Dehydrogenase-Related                                                  | 0.0033 | 0.0132 | 3.89  |
| 245249_at   | At4g16760 | Acyl-Coa Oxidase (Acx1)                                                         | 0.0394 | 0.0440 | 3.72  |
| 260789_s_at | At1g06290 | Acyl-Coa Oxidase (Acx3)                                                         | 0.0129 | 0.0251 | 2.81  |
| 265843_at   | At2g35690 | Acyl-Coa Oxidase, Putative                                                      | 0.0009 | 0.0074 | 2.62  |
| 249972_at   | At5g19040 | Adenylate Isopentenyltransferase 5 / Cytokinin Synthase (Ipt5)                  | 0.0332 | 0.0400 | 3.78  |
| 255741_at   | At1g25410 | Adenylate Isopentenyltransferase 6 / Adenylate Dimethylallyltransferase         | 0.0170 | 0.0285 | 3.49  |
| 260250_at   | At1g74260 | Air Synthase-Related Family Protein                                             | 0.0000 | 0.0019 | 8.05  |
| 258983_at   | At3g08860 | Alanine--Glyoxylate Aminotransferase, Putative                                  | 0.0143 | 0.0263 | 3.64  |
| 264953_at   | At1g77120 | Alcohol Dehydrogenase (Adh)                                                     | 0.0027 | 0.0119 | 5.94  |
| 254572_at   | At4g19380 | Alcohol Oxidase-Related                                                         | 0.0031 | 0.0128 | 7.89  |
| 265188_at   | At1g23800 | Aldehyde Dehydrogenase, Mitochondrial (Aldh3)                                   | 0.0445 | 0.0471 | 11.08 |
| 267095_at   | At2g38280 | Amp Deaminase, Putative / Myoadenylate Deaminase, Putative                      | 0.0135 | 0.0256 | 3.45  |
| 259545_at   | At1g20560 | Amp-Dependent Synthetase And Ligase Family Protein                              | 0.0013 | 0.0087 | 2.65  |
| 264589_at   | At2g17650 | Amp-Dependent Synthetase And Ligase Family Protein                              | 0.0000 | 0.0007 | 24.06 |
| 257880_at   | At3g16910 | Amp-Dependent Synthetase And Ligase Family Protein                              | 0.0067 | 0.0180 | 2.85  |
| 259334_at   | At3g03790 | Ankyrin Repeat Family Protein                                                   | 0.0008 | 0.0071 | 5.92  |
| 266671_at   | At2g29690 | Anthranilate Synthase, Alpha Subunit, Component I-2 (Asa2)                      | 0.0352 | 0.0414 | 3.72  |
| 252391_at   | At3g47860 | Apolipoprotein D-Related                                                        | 0.0025 | 0.0116 | 3.05  |
| 254891_at   | At4g11740 | Ara4-Interacting Protein, Putative (Say1)                                       | 0.0016 | 0.0094 | 2.82  |
| 258053_at   | At3g16230 | ASC-1 complex subunit P50                                                       | 0.0241 | 0.0341 | 2.54  |
| 245867_at   | At1g58080 | Atp Phosphoribosyl Transferase 1 (Atp-Prt1)                                     | 0.0102 | 0.0220 | 3.28  |
| 258515_at   | At3g06650 | Atp-Citrate Synthase, Putative / Atp-Citrate (Pro-S)-Lyase, Putative            | 0.0422 | 0.0456 | 5.26  |
| 247494_at   | At5g61790 | Calnexin 1 (Cnx1)                                                               | 0.0021 | 0.0105 | 3.87  |
| 256216_at   | At1g56340 | Calreticulin 1 (Crt1)                                                           | 0.0023 | 0.0111 | 3.28  |
| 264260_at   | At1g09210 | Calreticulin 2 (Crt2)                                                           | 0.0000 | 0.0005 | 2.71  |
| 262751_at   | At1g16310 | Cation Efflux Family Protein                                                    | 0.0089 | 0.0206 | 9.72  |
| 262940_at   | At1g79520 | Cation Efflux Family Protein                                                    | 0.0392 | 0.0438 | 3.74  |
| 264146_at   | At1g02205 | Cer1 Protein                                                                    | 0.0043 | 0.0148 | 7.04  |
| 264175_at   | At1g02050 | Chalcone And Stilbene Synthase Family Protein                                   | 0.0123 | 0.0244 | 4.13  |

|             |           |                                                                                  |        |        |       |
|-------------|-----------|----------------------------------------------------------------------------------|--------|--------|-------|
| 250207_at   | At5g13930 | Chalcone Synthase / Naringenin-Chalcone Synthase                                 | 0.0004 | 0.0048 | 9.13  |
| 246601_at   | At1g31710 | Copper Amine Oxidase, Putative                                                   | 0.0096 | 0.0214 | 3.87  |
| 265882_at   | At2g42490 | Copper Amine Oxidase, Putative                                                   | 0.0495 | 0.0498 | 3.41  |
| 255402_at   | At4g03205 | Coproporphyrinogen III Oxidase, Putative / Coproporphyrinogenase, Putative       | 0.0297 | 0.0379 | 2.62  |
| 255068_at   | At4g08920 | Cryptochrome 1 Apoprotein (Cry1) / Flavin-Type Blue-Light Photoreceptor (Hy4)    | 0.0132 | 0.0253 | 4.93  |
| 257702_at   | At3g12670 | Ctp Synthase, Putative / Utp--Ammonia Ligase, Putative                           | 0.0004 | 0.0050 | 3.05  |
| 253273_at   | At4g34180 | Cyclase Family Protein                                                           | 0.0075 | 0.0189 | 2.63  |
| 266045_s_at | At2g07727 | Cytochrome B (Mtcyb) (Cob) (Cytb)                                                | 0.0141 | 0.0261 | 3.28  |
| 262591_at   | At1g15220 | Cytochrome C Biogenesis Protein Family                                           | 0.0415 | 0.0452 | 6.59  |
| 265227_s_at | At2g07695 | Cytochrome C Oxidase Subunit II, Putative                                        | 0.0082 | 0.0199 | 2.87  |
| 262780_at   | At1g13090 | Cytochrome P450 71B28, Putative (Cyp71B28)                                       | 0.0003 | 0.0046 | 2.59  |
| 252827_at   | At4g39950 | Cytochrome P450 79B2, Putative (Cyp79B2)                                         | 0.0338 | 0.0405 | 2.69  |
| 253088_at   | At4g36220 | Cytochrome P450 84A1 (Cyp84A1) / Ferulate-5-Hydroxylase (Fah1)                   | 0.0084 | 0.0201 | 5.48  |
| 247765_at   | At5g58860 | Cytochrome P450 86A1 (Cyp86) (Cyp86A1)                                           | 0.0063 | 0.0175 | 7.63  |
| 266996_at   | At2g34490 | Cytochrome P450 Family Protein                                                   | 0.0282 | 0.0370 | 3.55  |
| 257129_at   | At3g20100 | Cytochrome P450 Family Protein                                                   | 0.0031 | 0.0128 | 6.96  |
| 256875_at   | At3g26330 | Cytochrome P450 Family Protein                                                   | 0.0100 | 0.0219 | 5.01  |
| 253886_at   | At4g27710 | Cytochrome P450 Family Protein                                                   | 0.0015 | 0.0091 | 4.37  |
| 246978_at   | At5g24910 | Cytochrome P450 Family Protein                                                   | 0.0446 | 0.0472 | 4.47  |
| 249684_s_at | At5g36110 | Cytochrome P450 Family Protein                                                   | 0.0072 | 0.0186 | 6.94  |
| 262717_s_at | At1g16410 | Cytochrome P450, Putative                                                        | 0.0043 | 0.0149 | 5.59  |
| 260599_at   | At1g55940 | Cytochrome P450, Putative                                                        | 0.0000 | 0.0015 | 11.73 |
| 258962_at   | At3g10570 | Cytochrome P450, Putative                                                        | 0.0126 | 0.0247 | 10.97 |
| 256788_at   | At3g13730 | Cytochrome P450, Putative                                                        | 0.0113 | 0.0234 | 3.95  |
| 258113_at   | At3g14650 | Cytochrome P450, Putative                                                        | 0.0279 | 0.0367 | 4.03  |
| 253502_at   | At4g31940 | Cytochrome P450, Putative                                                        | 0.0018 | 0.0099 | 17.43 |
| 253073_at   | At4g37410 | Cytochrome P450, Putative                                                        | 0.0009 | 0.0071 | 3.67  |
| 245710_at   | At5g04330 | Cytochrome P450, Putative / Ferulate-5-Hydroxylase, Putative                     | 0.0198 | 0.0308 | 2.84  |
| 265996_at   | At2g24200 | Cytosol Aminopeptidase                                                           | 0.0031 | 0.0128 | 3.35  |
| 259403_at   | At1g17745 | D-3-Phosphoglycerate Dehydrogenase / 3-Pgdh                                      | 0.0212 | 0.0319 | 2.73  |
| 253274_at   | At4g34200 | D-3-Phosphoglycerate Dehydrogenase, Putative / 3-Pgdh, Putative                  | 0.0202 | 0.0311 | 4.25  |
| 256862_at   | At3g23940 | Dehydratase Family                                                               | 0.0186 | 0.0299 | 3.02  |
| 251775_s_at | At3g55610 | Delta 1-Pyrroline-5-Carboxylate Synthetase B / P5Cs B (P5Cs2)                    | 0.0170 | 0.0285 | 10.02 |
| 247436_at   | At5g62530 | Delta-1-Pyrroline-5-Carboxylate Dehydrogenase (P5Cdh)                            | 0.0188 | 0.0300 | 2.59  |
| 247323_at   | At5g64170 | Dentin Sialophosphoprotein-Related                                               | 0.0017 | 0.0096 | 3.63  |
| 256341_at   | At1g72040 | Deoxynucleoside Kinase Family                                                    | 0.0166 | 0.0282 | 3.84  |
| 249840_at   | At5g23450 | Diacylglycerol Kinase Family Protein                                             | 0.0269 | 0.0361 | 2.57  |
| 259070_at   | At3g11670 | Digalactosyldiacylglycerol Synthase 1 (Dgd1) / Mgdg:Mgdg Galactosyltransferase   | 0.0085 | 0.0201 | 3.11  |
| 251392_at   | At3g60880 | Dihydrodipicolinate Synthase 1 (Dhdps1) (Dhdps) (Dhps1)                          | 0.0000 | 0.0017 | 2.53  |
| 257895_at   | At3g16950 | Dihydrolipoamide Dehydrogenase 1, Plastidic / Lipoamide Dehydrogenase 1 (Ptlpd1) | 0.0279 | 0.0367 | 4.43  |
| 258439_at   | At3g17240 | Dihydrolipoamide Dehydrogenase 2, Mitochondrial                                  | 0.0004 | 0.0051 | 4.18  |
| 256682_at   | At3g52200 | Dihydrolipoamide S-Acetyltransferase, Putative                                   | 0.0049 | 0.0156 | 3.08  |
| 257866_at   | At3g17770 | Dihydroxyacetone Kinase Family Protein                                           | 0.0009 | 0.0072 | 4.52  |
| 251474_at   | At3g59630 | Diphthamide Synthesis Dph2 Family Protein                                        | 0.0051 | 0.0160 | 3.20  |
| 264683_at   | At1g65580 | Endonuclease/Exonuclease/Phosphatase Family Protein                              | 0.0262 | 0.0356 | 2.51  |
| 251581_at   | At3g58560 | Endonuclease/Exonuclease/Phosphatase Family Protein                              | 0.0451 | 0.0475 | 2.69  |
| 251582_at   | At3g58580 | Endonuclease/Exonuclease/Phosphatase Family Protein                              | 0.0146 | 0.0266 | 2.56  |
| 250359_at   | At5g11350 | Endonuclease/Exonuclease/Phosphatase Family Protein                              | 0.0069 | 0.0182 | 16.70 |
| 259322_at   | At3g05270 | Endosome-associated protein (EEA1)                                               | 0.0082 | 0.0199 | 3.71  |
| 263924_at   | At2g36530 | Enolase                                                                          | 0.0007 | 0.0068 | 3.41  |
| 262619_at   | At1g06550 | Enoyl-Coa Hydratase/Isomerase Family Protein                                     | 0.0012 | 0.0084 | 4.36  |
| 253469_at   | At4g32180 | Eukaryotic Pantothenate Kinase Family Protein                                    | 0.0148 | 0.0268 | 4.53  |
| 256858_at   | At3g15140 | Exonuclease Family Protein                                                       | 0.0143 | 0.0262 | 4.07  |
| 264357_at   | At1g03360 | Exonuclease Family Protein                                                       | 0.0045 | 0.0151 | 2.83  |
| 247470_at   | At5g62220 | Exostosin Family Protein                                                         | 0.0128 | 0.0249 | 2.72  |
| 249885_at   | At5g22940 | Exostosin Family Protein                                                         | 0.0299 | 0.0381 | 2.50  |
| 265475_at   | At2g15620 | Ferredoxin--Nitrite Reductase, Putative                                          | 0.0168 | 0.0283 | 4.04  |
| 265122_at   | At1g62540 | Flavin-Containing Monooxygenase Family Protein / Fmo Family Protein              | 0.0330 | 0.0399 | 3.38  |
| 265121_at   | At1g62560 | Flavin-Containing Monooxygenase Family Protein / Fmo Family Protein              | 0.0000 | 0.0006 | 2.54  |
| 265119_at   | At1g62570 | Flavin-Containing Monooxygenase Family Protein / Fmo Family Protein              | 0.0485 | 0.0493 | 3.57  |
| 253794_at   | At4g28720 | Flavin-Containing Monooxygenase Family Protein / Fmo Family Protein              | 0.0110 | 0.0230 | 3.67  |
| 259126_at   | At3g02280 | Flavodoxin Family Protein                                                        | 0.0008 | 0.0069 | 3.66  |
| 247333_at   | At5g63600 | Flavonol Synthase, Putative                                                      | 0.0164 | 0.0280 | 10.39 |
| 253042_at   | At4g37550 | Formamidase, Putative / Formamide Amidohydrolase, Putative                       | 0.0001 | 0.0028 | 4.41  |
| 253048_at   | At4g37560 | Formamidase, Putative / Formamide Amidohydrolase, Putative                       | 0.0086 | 0.0203 | 3.51  |
| 262129_at   | At1g52500 | Formamidopyrimidine-Dna Glycolase Family Protein / Mutm, Putative (Mmh-1)        | 0.0259 | 0.0354 | 3.35  |
| 246595_at   | At5g14780 | Formate Dehydrogenase (Fdh)                                                      | 0.0112 | 0.0232 | 3.64  |
| 245417_at   | At4g17360 | Formyltetrahydrofolate Deformylase, Putative                                     | 0.0000 | 0.0002 | 6.62  |
| 250227_at   | At5g13830 | Ftsj-Like Methyltransferase Family Protein                                       | 0.0423 | 0.0456 | 3.35  |
| 255956_at   | At1g22015 | Galactosyltransferase Family Protein                                             | 0.0106 | 0.0225 | 3.98  |
| 266537_at   | At2g16860 | Gcip-Interacting Family Protein                                                  | 0.0000 | 0.0014 | 3.83  |
| 266189_at   | At2g39020 | Gcn5-Related N-Acetyltransferase (Gnat) Family Protein                           | 0.0462 | 0.0480 | 2.82  |
| 266142_at   | At2g39030 | Gcn5-Related N-Acetyltransferase (Gnat) Family Protein                           | 0.0033 | 0.0132 | 3.91  |
| 252996_s_at | At4g38460 | Geranylgeranyl Pyrophosphate Synthase, Putative                                  | 0.0330 | 0.0399 | 4.22  |

|             |           |                                                                              |        |        |       |
|-------------|-----------|------------------------------------------------------------------------------|--------|--------|-------|
| 254065_at   | At4g25420 | Gibberellin 20-Oxidase                                                       | 0.0139 | 0.0258 | 6.12  |
| 261768_at   | At1g15550 | Gibberellin 3-Beta-Dioxygenase / Gibberellin 3 Beta-Hydroxylase (Ga4)        | 0.0062 | 0.0174 | 2.92  |
| 264211_at   | At1g22770 | Gigantea Protein (Gi)                                                        | 0.0358 | 0.0418 | 3.90  |
| 264855_at   | At2g17265 | Homoserine Kinase (Hsk)                                                      | 0.0240 | 0.0340 | 3.52  |
| 249585_at   | At5g37830 | Hydantoinase/Oxoprolinase Family Protein                                     | 0.0197 | 0.0307 | 3.36  |
| 254076_at   | At4g25340 | Immunophilin-Related / Fkbp-Type Peptidyl-Prolyl Cis-Trans Isomerase-Related | 0.0420 | 0.0455 | 3.38  |
| 258531_at   | At3g06720 | Importin Alpha-1 Subunit, Putative (Impa1)                                   | 0.0102 | 0.0221 | 2.90  |
| 245844_at   | At1g26170 | Importin Beta-2 Subunit Family Protein                                       | 0.0219 | 0.0323 | 3.56  |
| 251495_at   | At3g59020 | Importin Beta-2 Subunit Family Protein                                       | 0.0035 | 0.0135 | 4.14  |
| 266523_at   | At2g16950 | Importin Beta-2 Subunit Family Protein                                       | 0.0215 | 0.0321 | 2.81  |
| 261208_at   | At1g12930 | Importin-Related                                                             | 0.0335 | 0.0402 | 2.65  |
| 265339_at   | At2g18230 | Inorganic Pyrophosphatase (Soluble) (Ppa)                                    | 0.0084 | 0.0201 | 3.28  |
| 262754_at   | At1g16350 | Inosine-5'-Monophosphate Dehydrogenase, Putative                             | 0.0329 | 0.0399 | 2.92  |
| 261522_at   | At1g71710 | Inositol Polyphosphate 5-Phosphatase, Putative                               | 0.0002 | 0.0037 | 2.71  |
| 252863_at   | At4g39800 | Inositol-3-Phosphate Synthase Isozyme 1                                      | 0.0069 | 0.0183 | 3.30  |
| 253392_at   | At4g32650 | Inward Rectifying Potassium Channel, Putative (Kat3) (Akt4) (Kc1)            | 0.0407 | 0.0448 | 2.55  |
| 263083_at   | At2g27190 | Iron(III)-Zinc(II) Purple Acid Phosphatase (Pap12)                           | 0.0313 | 0.0389 | 2.65  |
| 254547_at   | At4g19860 | Lecithin:Cholesterol Acyltransferase Family Protein / Lact Family Protein    | 0.0061 | 0.0173 | 4.04  |
| 260190_at   | At1g67560 | Lipoxygenase Family Protein                                                  | 0.0001 | 0.0030 | 3.86  |
| 259761_at   | At1g77590 | Long-Chain-Fatty-Acid--Coa Ligase Family Protein                             | 0.0007 | 0.0064 | 2.67  |
| 264100_at   | At1g78970 | Lupeol Synthase (Lup1) / 2,3-Oxidodisqualene-Triterpenoid Cyclase            | 0.0019 | 0.0101 | 2.78  |
| 250243_at   | At5g13630 | Magnesium-Chelatase Subunit Chlh, Chloroplast, Putative                      | 0.0009 | 0.0073 | 5.94  |
| 249218_at   | At5g42390 | Metalloendopeptidase                                                         | 0.0000 | 0.0002 | 3.08  |
| 263707_at   | At1g09300 | Metallopeptidase M24 Family Protein                                          | 0.0455 | 0.0477 | 3.65  |
| 259378_at   | At3g16310 | Mitotic Phosphoprotein N' End (Mppn) Family Protein                          | 0.0026 | 0.0118 | 2.82  |
| 253733_at   | At4g29170 | Mnd1 Family Protein                                                          | 0.0410 | 0.0449 | 7.43  |
| 260325_at   | At1g63940 | Monodehydroascorbate Reductase, Putative                                     | 0.0168 | 0.0283 | 5.24  |
| 264752_at   | At1g23010 | Multi-Copper Oxidase Type I Family Protein                                   | 0.0001 | 0.0026 | 2.59  |
| 264954_at   | At1g77060 | Mutase Family Protein                                                        | 0.0277 | 0.0366 | 3.06  |
| 261354_at   | At1g79690 | Mutt/Nudix Family Protein                                                    | 0.0110 | 0.0230 | 3.13  |
| 263153_s_at | At1g54010 | Myrosinase-Associated Protein, Putative                                      | 0.0035 | 0.0135 | 5.50  |
| 260985_at   | At1g53500 | Nad-Dependent Epimerase/Dehydratase Family Protein                           | 0.0051 | 0.0160 | 3.37  |
| 263134_at   | At1g78570 | Nad-Dependent Epimerase/Dehydratase Family Protein                           | 0.0044 | 0.0150 | 3.41  |
| 256575_at   | At3g14790 | Nad-Dependent Epimerase/Dehydratase Family Protein                           | 0.0002 | 0.0033 | 3.17  |
| 252123_at   | At3g51240 | Naringenin 3-Dioxygenase / Flavanone 3-Hydroxylase (F3H)                     | 0.0011 | 0.0078 | 4.59  |
| 265398_at   | At2g11000 | Natc N(Alpha)-Terminal Acetyltransferase, Mak10 Subunit Family Protein       | 0.0014 | 0.0090 | 2.91  |
| 259681_at   | At1g77760 | Nitrate Reductase 1 (Nr1)                                                    | 0.0185 | 0.0299 | 10.65 |
| 261979_at   | At1g37130 | Nitrate Reductase 2 (Nr2)                                                    | 0.0143 | 0.0263 | 3.09  |
| 264169_at   | At1g02020 | Nitroreductase Family Protein                                                | 0.0063 | 0.0175 | 3.81  |
| 267513_at   | At2g45620 | Nucleotidyltransferase Family Protein                                        | 0.0119 | 0.0240 | 2.99  |
| 258575_at   | At3g04240 | O-Linked N-Acetyl Glucosamine Transferase, Putative                          | 0.0346 | 0.0410 | 2.86  |
| 253547_at   | At4g30950 | Omega-6 Fatty Acid Desaturase, Chloroplast (Fad6) (Fadc)                     | 0.0099 | 0.0218 | 3.78  |
| 260164_at   | At1g79870 | Oxidoreductase Family Protein                                                | 0.0071 | 0.0185 | 4.01  |
| 262572_at   | At1g15140 | Oxidoreductase Protein                                                       | 0.0093 | 0.0211 | 2.78  |
| 262527_at   | At1g17010 | Oxidoreductase, 2Og-Fe(II) Oxygenase Family Protein                          | 0.0188 | 0.0300 | 3.39  |
| 262482_at   | At1g17020 | Oxidoreductase, 2Og-Fe(II) Oxygenase Family Protein                          | 0.0155 | 0.0274 | 12.32 |
| 257135_at   | At3g12900 | Oxidoreductase, 2Og-Fe(II) Oxygenase Family Protein                          | 0.0325 | 0.0397 | 5.29  |
| 256892_at   | At3g19000 | Oxidoreductase, 2Og-Fe(II) Oxygenase Family Protein                          | 0.0001 | 0.0027 | 3.44  |
| 252530_at   | At3g46500 | Oxidoreductase, 2Og-Fe(II) Oxygenase Family Protein                          | 0.0065 | 0.0177 | 3.53  |
| 245204_at   | At5g12270 | Oxidoreductase, 2Og-Fe(II) Oxygenase Family Protein                          | 0.0014 | 0.0087 | 2.94  |
| 264283_at   | At1g61850 | Patatin Family Protein                                                       | 0.0010 | 0.0074 | 13.41 |
| 246252_s_at | At4g37070 | Patatin, Putative                                                            | 0.0086 | 0.0203 | 3.99  |
| 251174_at   | At3g63200 | Patatin-Related                                                              | 0.0027 | 0.0119 | 2.89  |
| 264611_at   | At1g04680 | Pectate Lyase Family Protein                                                 | 0.0091 | 0.0209 | 3.84  |
| 247377_at   | At5g63180 | Pectate Lyase Family Protein                                                 | 0.0031 | 0.0128 | 3.31  |
| 264177_at   | At1g02150 | Pentatricopeptide (Ppr) Repeat-Containing Protein                            | 0.0009 | 0.0073 | 2.52  |
| 256107_at   | At1g16830 | Pentatricopeptide (Ppr) Repeat-Containing Protein                            | 0.0005 | 0.0055 | 4.09  |
| 261133_at   | At1g19720 | Pentatricopeptide (Ppr) Repeat-Containing Protein                            | 0.0022 | 0.0107 | 3.23  |
| 263220_at   | At1g30610 | Pentatricopeptide (Ppr) Repeat-Containing Protein                            | 0.0001 | 0.0025 | 4.35  |
| 259622_at   | At1g43010 | Pentatricopeptide (Ppr) Repeat-Containing Protein                            | 0.0031 | 0.0129 | 6.64  |
| 260595_at   | At1g55890 | Pentatricopeptide (Ppr) Repeat-Containing Protein                            | 0.0082 | 0.0198 | 4.44  |
| 246414_at   | At1g77340 | Pentatricopeptide (Ppr) Repeat-Containing Protein                            | 0.0125 | 0.0246 | 10.48 |
| 262941_at   | At1g79490 | Pentatricopeptide (Ppr) Repeat-Containing Protein                            | 0.0013 | 0.0087 | 3.36  |
| 266114_at   | At2g02150 | Pentatricopeptide (Ppr) Repeat-Containing Protein                            | 0.0034 | 0.0135 | 6.20  |
| 265474_at   | At2g15690 | Pentatricopeptide (Ppr) Repeat-Containing Protein                            | 0.0099 | 0.0218 | 3.78  |
| 265484_at   | At2g15820 | Pentatricopeptide (Ppr) Repeat-Containing Protein                            | 0.0059 | 0.0170 | 3.78  |
| 266951_at   | At2g18940 | Pentatricopeptide (Ppr) Repeat-Containing Protein                            | 0.0008 | 0.0070 | 32.46 |
| 266164_at   | At2g28050 | Pentatricopeptide (Ppr) Repeat-Containing Protein                            | 0.0011 | 0.0080 | 3.21  |
| 267086_at   | At2g32630 | Pentatricopeptide (Ppr) Repeat-Containing Protein                            | 0.0305 | 0.0384 | 3.93  |
| 267445_at   | At2g33680 | Pentatricopeptide (Ppr) Repeat-Containing Protein                            | 0.0059 | 0.0170 | 10.62 |
| 256325_at   | At3g02330 | Pentatricopeptide (Ppr) Repeat-Containing Protein                            | 0.0073 | 0.0187 | 4.74  |
| 258355_at   | At3g14330 | Pentatricopeptide (Ppr) Repeat-Containing Protein                            | 0.0001 | 0.0030 | 3.31  |
| 252216_at   | At3g50420 | Pentatricopeptide (Ppr) Repeat-Containing Protein                            | 0.0266 | 0.0358 | 4.93  |

|             |           |                                                                                     |        |        |       |
|-------------|-----------|-------------------------------------------------------------------------------------|--------|--------|-------|
| 251496_at   | At3g59040 | Pentatricopeptide (Ppr) Repeat-Containing Protein                                   | 0.0126 | 0.0247 | 2.50  |
| 255573_at   | At4g01400 | Pentatricopeptide (Ppr) Repeat-Containing Protein                                   | 0.0003 | 0.0042 | 3.75  |
| 254725_at   | At4g13650 | Pentatricopeptide (Ppr) Repeat-Containing Protein                                   | 0.0006 | 0.0058 | 7.84  |
| 245498_at   | At4g16470 | Pentatricopeptide (Ppr) Repeat-Containing Protein                                   | 0.0177 | 0.0291 | 2.96  |
| 253979_at   | At4g26680 | Pentatricopeptide (Ppr) Repeat-Containing Protein                                   | 0.0000 | 0.0017 | 3.34  |
| 253116_at   | At4g35850 | Pentatricopeptide (Ppr) Repeat-Containing Protein                                   | 0.0002 | 0.0033 | 2.51  |
| 250856_at   | At5g04810 | Pentatricopeptide (Ppr) Repeat-Containing Protein                                   | 0.0012 | 0.0084 | 3.25  |
| 250303_at   | At5g12100 | Pentatricopeptide (Ppr) Repeat-Containing Protein                                   | 0.0155 | 0.0274 | 3.23  |
| 250257_at   | At5g13770 | Pentatricopeptide (Ppr) Repeat-Containing Protein                                   | 0.0269 | 0.0360 | 2.80  |
| 246173_s_at | At5g28370 | Pentatricopeptide (Ppr) Repeat-Containing Protein                                   | 0.0091 | 0.0208 | 3.27  |
| 246174_s_at | At5g28380 | Pentatricopeptide (Ppr) Repeat-Containing Protein                                   | 0.0485 | 0.0493 | 8.71  |
| 249247_at   | At5g42310 | Pentatricopeptide (Ppr) Repeat-Containing Protein                                   | 0.0008 | 0.0069 | 4.72  |
| 249088_at   | At5g44230 | Pentatricopeptide (Ppr) Repeat-Containing Protein                                   | 0.0066 | 0.0179 | 7.58  |
| 247099_at   | At5g66500 | Pentatricopeptide (Ppr) Repeat-Containing Protein                                   | 0.0418 | 0.0454 | 4.28  |
| 260295_at   | At1g63770 | Peptidase M1 Family Protein                                                         | 0.0032 | 0.0129 | 2.77  |
| 250441_at   | At5g10540 | Peptidase M3 Family Protein / Thimet Oligopeptidase Family Protein                  | 0.0256 | 0.0352 | 2.87  |
| 247152_at   | At5g65620 | Peptidase M3 Family Protein / Thimet Oligopeptidase Family Protein                  | 0.0361 | 0.0419 | 2.57  |
| 259763_at   | At1g77630 | Peptidoglycan-Binding LysM Domain-Containing Protein                                | 0.0021 | 0.0105 | 2.97  |
| 257822_at   | At3g25230 | Peptidyl-Prolyl Cis-Trans Isomerase / Fk506-Binding Protein (Rof1)                  | 0.0000 | 0.0007 | 2.51  |
| 248657_at   | At5g48570 | Peptidyl-Prolyl Cis-Trans Isomerase, Putative / Fk506-Binding Protein, Putative     | 0.0001 | 0.0031 | 3.88  |
| 251932_at   | At3g54010 | Peptidyl-Prolyl Cis-Trans Isomerase, Putative / Fk506-Binding Protein, Putative     | 0.0075 | 0.0189 | 2.70  |
| 250926_at   | At5g03255 | Permease, Cytosine/Purines, Uracil, Thiamine, Allantoin Family Protein              | 0.0258 | 0.0353 | 3.73  |
| 261518_at   | At1g71695 | Peroxidase 12 (Per12) (P12) (Prxr6)                                                 | 0.0053 | 0.0163 | 3.68  |
| 254386_at   | At4g21960 | Peroxidase 42 (Per42) (P42) (Prxr1)                                                 | 0.0315 | 0.0390 | 3.90  |
| 267053_s_at | At2g38390 | Peroxidase, Putative                                                                | 0.0017 | 0.0095 | 7.00  |
| 252138_at   | At3g50990 | Peroxidase, Putative                                                                | 0.0192 | 0.0303 | 2.99  |
| 245821_at   | At1g26270 | Phosphatidylinositol 3- And 4-Kinase Family Protein                                 | 0.0065 | 0.0178 | 2.91  |
| 262387_s_at | At1g49340 | Phosphatidylinositol 3- And 4-Kinase Family Protein                                 | 0.0010 | 0.0076 | 3.49  |
| 260466_at   | At1g10900 | Phosphatidylinositol-4-Phosphate 5-Kinase Family Protein                            | 0.0331 | 0.0399 | 3.96  |
| 258361_at   | At3g14270 | Phosphatidylinositol-4-Phosphate 5-Kinase Family Protein                            | 0.0233 | 0.0335 | 2.60  |
| 253371_at   | At4g33240 | Phosphatidylinositol-4-Phosphate 5-Kinase Family Protein                            | 0.0035 | 0.0135 | 8.32  |
| 257217_at   | At3g14940 | Phosphoenolpyruvate Carboxylase, Putative / Pep Carboxylase, Putative               | 0.0216 | 0.0321 | 2.76  |
| 260590_at   | At1g53310 | Phosphoenolpyruvate Carboxylase, Putative / Pep Carboxylase, Putative (Ppc1)        | 0.0304 | 0.0384 | 6.11  |
| 263491_at   | At2g42600 | Phosphoenolpyruvate Carboxylase, Putative / Pep Carboxylase, Putative (Ppc2)        | 0.0048 | 0.0155 | 5.26  |
| 256041_at   | At1g07230 | Phosphoesterase Family Protein                                                      | 0.0096 | 0.0215 | 3.17  |
| 264903_at   | At1g23190 | Phosphoglucosyltransferase, Cytoplasmic, Putative / Glucose Phosphomutase, Putative | 0.0007 | 0.0068 | 3.38  |
| 249899_at   | At5g22620 | Phosphoglycerate/Bisphosphoglycerate Mutase Family Protein                          | 0.0058 | 0.0169 | 2.97  |
| 261060_at   | At1g17340 | Phosphoinositide Phosphatase Family Protein                                         | 0.0168 | 0.0283 | 3.15  |
| 255720_at   | At1g32060 | Phosphoribulokinase (Prk) / Phosphopentokinase                                      | 0.0111 | 0.0231 | 4.77  |
| 255067_at   | At4g08960 | Phosphotyrosyl Phosphatase Activator (Ptpa) Family Protein                          | 0.0162 | 0.0280 | 2.70  |
| 245150_at   | At2g47590 | Photolyase/Blue Light Photoreceptor (Phr2)                                          | 0.0172 | 0.0286 | 3.57  |
| 262557_at   | At1g31330 | Photosystem I Reaction Center Subunit Iii Family Protein                            | 0.0365 | 0.0421 | 2.54  |
| 257082_at   | At3g20580 | Phytochelatin Synthetase-Related                                                    | 0.0012 | 0.0084 | 7.09  |
| 264508_at   | At1g09570 | Phytochrome A (Phya)                                                                | 0.0135 | 0.0256 | 3.81  |
| 249666_at   | At5g35840 | Phytochrome C (Phyc)                                                                | 0.0081 | 0.0197 | 3.18  |
| 245487_at   | At4g16250 | Phytochrome D (Phyd)                                                                | 0.0062 | 0.0174 | 4.56  |
| 264510_at   | At1g09530 | Phytochrome Interacting Factor 3 (Pif3)                                             | 0.0053 | 0.0163 | 3.26  |
| 261407_at   | At1g18810 | Phytochrome Kinase Substrate-Related                                                | 0.0195 | 0.0305 | 2.75  |
| 245792_at   | At1g32100 | Pinorensin-Lariciresinol Reductase, Putative                                        | 0.0044 | 0.0149 | 3.14  |
| 251434_at   | At3g59850 | Polygalacturonase, Putative / Pectinase, Putative                                   | 0.0022 | 0.0108 | 14.06 |
| 250570_at   | At5g08170 | Porphyromonas-Type Peptidyl-Arginine Deiminase Family Protein                       | 0.0001 | 0.0023 | 3.30  |
| 251732_at   | At3g56110 | Prenylated Rab Acceptor (Pra1) Family Protein                                       | 0.0269 | 0.0360 | 3.42  |
| 256785_at   | At3g13720 | Prenylated Rab Acceptor (Pra1) Family Protein                                       | 0.0145 | 0.0264 | 8.05  |
| 259663_at   | At1g55190 | Prenylated Rab Acceptor (Pra1) Family Protein                                       | 0.0095 | 0.0213 | 2.76  |
| 264808_at   | At1g08770 | Prenylated Rab Acceptor (Pra1) Family Protein                                       | 0.0018 | 0.0098 | 2.96  |
| 261758_at   | At1g08250 | Prephenate Dehydratase Family Protein                                               | 0.0430 | 0.0462 | 3.22  |
| 255540_at   | At4g01800 | Preprotein Translocase Seca Subunit, Putative                                       | 0.0077 | 0.0193 | 3.07  |
| 253704_at   | At4g29500 | Prolidase-Related                                                                   | 0.0031 | 0.0128 | 2.68  |
| 256288_at   | At3g12270 | Protein Arginine N-Methyltransferase Family Protein                                 | 0.0461 | 0.0479 | 8.95  |
| 266687_at   | At2g19670 | Protein Arginine N-Methyltransferase, Putative                                      | 0.0010 | 0.0074 | 4.92  |
| 259757_at   | At1g77510 | Protein Disulfide Isomerase, Putative                                               | 0.0000 | 0.0010 | 4.22  |
| 262504_at   | At1g21750 | Protein Disulfide Isomerase, Putative                                               | 0.0004 | 0.0052 | 4.63  |
| 253871_at   | At4g27440 | Protochlorophyllide Reductase B, Chloroplast / Pcr B                                | 0.0018 | 0.0098 | 4.58  |
| 255537_at   | At4g01690 | Protoporphyrinogen Oxidase (Ppox)                                                   | 0.0408 | 0.0448 | 3.91  |
| 264497_at   | At1g30840 | Purine Permease-Related                                                             | 0.0009 | 0.0073 | 2.72  |
| 267552_at   | At2g32770 | Purple Acid Phosphatase (Pap13)                                                     | 0.0163 | 0.0280 | 7.00  |
| 260594_at   | At1g55880 | Pyridoxal-5'-Phosphate-Dependent Enzyme, Beta Family Protein                        | 0.0034 | 0.0134 | 7.74  |
| 253416_at   | At4g33070 | Pyruvate Decarboxylase, Putative                                                    | 0.0078 | 0.0193 | 3.04  |
| 256160_at   | At1g30120 | Pyruvate Dehydrogenase E1 Component Beta Subunit, Chloroplast                       | 0.0138 | 0.0258 | 3.92  |
| 248486_at   | At5g51060 | Respiratory Burst Oxidase Protein C (RbohC) / Nadph Oxidase                         | 0.0281 | 0.0368 | 2.95  |
| 256011_at   | At1g19230 | Respiratory Burst Oxidase Protein E (RbohE) / Nadph Oxidase                         | 0.0043 | 0.0148 | 6.58  |
| 255891_at   | At1g17870 | S2P-like putative metalloprotease                                                   | 0.0166 | 0.0282 | 2.71  |
| 251589_at   | At3g58040 | Seven In Absentia (Sina) Family Protein                                             | 0.0320 | 0.0393 | 2.88  |
| 267581_at   | At2g41980 | Seven In Absentia (Sina) Family Protein                                             | 0.0270 | 0.0361 | 4.11  |

|                                                     |           |                                                                                    |        |        |       |
|-----------------------------------------------------|-----------|------------------------------------------------------------------------------------|--------|--------|-------|
| 249947_at                                           | At5g19200 | Short-Chain Dehydrogenase/Reductase (Sdr) Family Protein                           | 0.0263 | 0.0356 | 5.84  |
| 267516_at                                           | At2g30520 | Signal Transducer Of Phototropic Response (Rpt2)                                   | 0.0431 | 0.0462 | 2.78  |
| 252613_at                                           | At3g45190 | Sit4 Phosphatase-Associated Family Protein                                         | 0.0478 | 0.0488 | 3.94  |
| 260679_at                                           | At1g07990 | Sit4 Phosphatase-Associated Family Protein                                         | 0.0125 | 0.0246 | 3.24  |
| 259451_at                                           | At1g13890 | Snap25 Homologous Protein, Putative                                                | 0.0154 | 0.0273 | 2.98  |
| 249773_at                                           | At5g24140 | Squalene Monooxygenase 2 / Squalene Epoxidase 2 (SqP2)                             | 0.0274 | 0.0363 | 2.56  |
| 253039_at                                           | At4g37760 | Squalene Monooxygenase, Putative / Squalene Epoxidase, Putative                    | 0.0474 | 0.0486 | 3.27  |
| 266831_at                                           | At2g22830 | Squalene Monooxygenase, Putative / Squalene Epoxidase, Putative                    | 0.0219 | 0.0323 | 2.74  |
| 250846_at                                           | At5g04590 | Sulfite Reductase / Ferredoxin (Sir)                                               | 0.0009 | 0.0071 | 3.19  |
| 260385_at                                           | At1g74090 | Sulfotransferase Family Protein                                                    | 0.0000 | 0.0006 | 2.88  |
| 254512_at                                           | At4g20230 | Terpene Synthase/Cyclase Family Protein                                            | 0.0208 | 0.0316 | 4.99  |
| 257557_at                                           | At3g14490 | Terpene Synthase/Cyclase Family Protein                                            | 0.0182 | 0.0295 | 16.20 |
| 260935_at                                           | At1g45110 | Tetrapyrrole Methylase Family Protein                                              | 0.0386 | 0.0435 | 3.29  |
| 261053_at                                           | At1g01320 | Tetratricopeptide Repeat (Tpr)-Containing Protein                                  | 0.0000 | 0.0000 | 5.85  |
| 262577_at                                           | At1g15290 | Tetratricopeptide Repeat (Tpr)-Containing Protein                                  | 0.0167 | 0.0282 | 4.20  |
| 257932_at                                           | At3g17040 | Tetratricopeptide Repeat (Tpr)-Containing Protein                                  | 0.0082 | 0.0199 | 2.87  |
| 254275_at                                           | At4g22670 | Tetratricopeptide Repeat (Tpr)-Containing Protein                                  | 0.0027 | 0.0120 | 3.56  |
| 247832_at                                           | At5g58550 | Tetratricopeptide Repeat (Tpr)-Containing Protein                                  | 0.0275 | 0.0365 | 2.73  |
| 245118_at                                           | At2g41680 | Thioredoxin Reductase, Putative / NADPH-Dependent Thioredoxin Reductase, Putative  | 0.0426 | 0.0459 | 4.38  |
| 250234_at                                           | At5g13420 | Transaldolase, Putative                                                            | 0.0012 | 0.0082 | 3.52  |
| 260967_at                                           | At1g12230 | Transaldolase, Putative                                                            | 0.0164 | 0.0280 | 2.83  |
| 251396_at                                           | At3g60750 | Transketolase, Putative                                                            | 0.0009 | 0.0071 | 9.76  |
| 253698_at                                           | At4g29680 | Type I Phosphodiesterase/Nucleotide Pyrophosphatase Family Protein                 | 0.0055 | 0.0164 | 2.57  |
| 253197_at                                           | At4g35250 | Vestitone Reductase-Related                                                        | 0.0297 | 0.0379 | 3.43  |
| 260521_at                                           | At2g41740 | Villin 2 (Vln2)                                                                    | 0.0287 | 0.0372 | 2.55  |
| 253719_at                                           | At4g29490 | Xaa-Pro Dipeptidase, Putative / Prolidase, Putative                                | 0.0202 | 0.0311 | 3.59  |
| 266254_at                                           | At2g27810 | Xanthine/Uracil Permease Family Protein                                            | 0.0058 | 0.0170 | 2.80  |
| E3. Glycolysis                                      |           |                                                                                    |        |        |       |
| 265735_at                                           | At2g01140 | Fructose-Bisphosphate Aldolase, Putative                                           | 0.0027 | 0.0120 | 4.38  |
| 263761_at                                           | At2g21330 | Fructose-Bisphosphate Aldolase, Putative                                           | 0.0366 | 0.0422 | 2.69  |
| 252022_at                                           | At3g52930 | Fructose-Bisphosphate Aldolase, Putative                                           | 0.0004 | 0.0052 | 5.32  |
| 253971_at                                           | At4g26530 | Fructose-Bisphosphate Aldolase, Putative                                           | 0.0243 | 0.0342 | 3.08  |
| 247983_at                                           | At5g56630 | Phosphofructokinase Family Protein                                                 | 0.0005 | 0.0057 | 2.56  |
| 256228_at                                           | At1g56190 | Phosphoglycerate Kinase, Putative                                                  | 0.0072 | 0.0186 | 2.56  |
| 262944_at                                           | At1g79550 | Phosphoglycerate Kinase, Putative                                                  | 0.0174 | 0.0289 | 3.27  |
| 259969_at                                           | At1g76550 | Pyrophosphate-Fructose-6-Phosphate 1-Phosphotransferase Alpha Subunit, Putative    | 0.0008 | 0.0071 | 2.51  |
| 264386_at                                           | At1g12000 | Pyrophosphate-Fructose-6-Phosphate 1-Phosphotransferase Alpha Subunit, Putative    | 0.0015 | 0.0091 | 3.32  |
| 262806_at                                           | At1g20950 | Pyrophosphate-Fructose-6-Phosphate 1-Phosphotransferase Alpha Subunit, Putative    | 0.0306 | 0.0385 | 2.73  |
| 263922_s_at                                         | At2g36580 | Pyruvate Kinase, Putative                                                          | 0.0328 | 0.0398 | 3.83  |
| 256836_at                                           | At3g22960 | Pyruvate Kinase, Putative                                                          | 0.0323 | 0.0395 | 3.83  |
| 250526_at                                           | At5g08570 | Pyruvate Kinase, Putative                                                          | 0.0015 | 0.0091 | 4.25  |
| 248283_at                                           | At5g52920 | Pyruvate Kinase, Putative                                                          | 0.0162 | 0.0280 | 3.34  |
| 247989_at                                           | At5g56350 | Pyruvate Kinase, Putative                                                          | 0.0077 | 0.0193 | 5.36  |
| E4. Clathrin binding                                |           |                                                                                    |        |        |       |
| 254261_at                                           | At4g23460 | Beta-Adaptin, Putative                                                             | 0.0027 | 0.0120 | 6.30  |
| 254925_at                                           | At4g11380 | Beta-Adaptin, Putative                                                             | 0.0215 | 0.0321 | 5.24  |
| 250816_at                                           | At5g05010 | Clathrin Adaptor Complexes Medium Subunit-Related                                  | 0.0025 | 0.0115 | 3.31  |
| 256437_s_at                                         | At3g11130 | Clathrin Heavy Chain, Putative                                                     | 0.0318 | 0.0392 | 3.30  |
| 253528_s_at                                         | At4g31480 | Coatomer Beta Subunit, Putative / Beta-Coat Protein, Putative / Beta-Cop, Putative | 0.0001 | 0.0030 | 3.07  |
| 263743_at                                           | At2g21390 | Coatomer Protein Complex, Subunit Alpha, Putative                                  | 0.0066 | 0.0180 | 3.92  |
| 264309_at                                           | At1g62020 | Coatomer Protein Complex, Subunit Alpha, Putative                                  | 0.0028 | 0.0120 | 3.69  |
| 262051_at                                           | At1g79990 | Coatomer Protein Complex, Subunit Beta 2 (Beta Prime), Putative                    | 0.0475 | 0.0486 | 2.94  |
| 256146_at                                           | At1g48760 | Delta-Adaptin, Putative                                                            | 0.0000 | 0.0012 | 9.81  |
| 246634_at                                           | At1g31730 | Epsilon-Adaptin, Putative                                                          | 0.0317 | 0.0391 | 2.79  |
| 256485_at                                           | At1g31440 | Sh3 Domain-Containing Protein 1 (Sh3P1)                                            | 0.0199 | 0.0309 | 4.60  |
| 253229_at                                           | At4g34660 | Sh3 Domain-Containing Protein 2 (Sh3P2)                                            | 0.0092 | 0.0210 | 4.91  |
| E5. Intracellular membrane/membrane bound organelle |           |                                                                                    |        |        |       |
| 258625_at                                           | At3g04370 | 33 Kda Secretory protein                                                           | 0.0002 | 0.0032 | 3.27  |
| 265011_at                                           | At1g24490 | 60 Kda Inner Membrane Family Protein                                               | 0.0077 | 0.0193 | 2.68  |
| 250766_at                                           | At5g05550 | 6B-Interacting protein 1                                                           | 0.0210 | 0.0317 | 2.82  |
| 266939_at                                           | At2g18960 | Atpase 1, Plasma Membrane-Type, Putative                                           | 0.0043 | 0.0149 | 3.54  |
| 253609_at                                           | At4g30190 | Atpase 1, Plasma Membrane-Type, Putative                                           | 0.0000 | 0.0018 | 2.64  |
| 249846_at                                           | At5g23630 | Atpase E1-E2 Type Family Protein                                                   | 0.0005 | 0.0054 | 4.05  |
| 267488_at                                           | At2g19110 | Atpase E1-E2 Type Family Protein                                                   | 0.0035 | 0.0135 | 3.84  |
| 266012_s_at                                         | At2g07741 | Atpase Subunit 6, Putative                                                         | 0.0008 | 0.0071 | 3.41  |
| 252820_at                                           | At3g42640 | Atpase, Plasma Membrane-Type, Putative / Proton Pump, Putative                     | 0.0019 | 0.0102 | 4.00  |
| 247439_at                                           | At5g62670 | Atpase, Plasma Membrane-Type, Putative / Proton Pump, Putative                     | 0.0000 | 0.0000 | 2.99  |
| 265443_at                                           | At2g20750 | Beta-Expansin, Putative (Expb1)                                                    | 0.0062 | 0.0174 | 6.08  |
| 265576_at                                           | At2g20190 | Clip-Associating Protein (Clasp) -Related                                          | 0.0069 | 0.0182 | 2.64  |
| 246263_at                                           | At1g31780 | Conserved Oligomeric Golgi Complex Component-Related                               | 0.0167 | 0.0283 | 2.63  |

|             |           |                                                                                    |        |        |       |
|-------------|-----------|------------------------------------------------------------------------------------|--------|--------|-------|
| 253876_at   | At4g27430 | Cop1-Interacting Protein 7 (Cip7)                                                  | 0.0046 | 0.0152 | 3.50  |
| 261031_at   | At1g17360 | Cop1-Interacting Protein-Related                                                   | 0.0004 | 0.0049 | 3.00  |
| 257385_at   | At2g01800 | Cop1-Interacting Protein-Related                                                   | 0.0098 | 0.0217 | 10.46 |
| 249271_at   | At5g41790 | Cop1-Interactive Protein 1 / Cip1                                                  | 0.0027 | 0.0120 | 9.09  |
| 251311_at   | At3g61140 | Cop9 Signalosome Complex Subunit 1 / Csn Complex Subunit 1 (Csn1)                  | 0.0019 | 0.0101 | 2.51  |
| 257693_at   | At3g12850 | Cop9 Signalosome Complex-Related / Csn Complex-Related                             | 0.0144 | 0.0263 | 3.62  |
| 258054_at   | At3g16240 | Delta Tonoplast Integral Protein (Delta-Tip)                                       | 0.0405 | 0.0446 | 2.52  |
| 263618_at   | At2g04660 | E3 Ubiquitin Ligase, Putative                                                      | 0.0005 | 0.0058 | 5.14  |
| 246650_at   | At5g35160 | Endomembrane Protein 70, Putative                                                  | 0.0312 | 0.0388 | 2.74  |
| 254827_at   | At4g12650 | Endomembrane Protein 70, Putative                                                  | 0.0413 | 0.0451 | 3.79  |
| 260482_at   | At1g10950 | Endomembrane Protein 70, Putative                                                  | 0.0236 | 0.0337 | 2.66  |
| 245211_at   | At5g12370 | Exocyst Complex Component Sec10-Related                                            | 0.0186 | 0.0299 | 3.08  |
| 259156_at   | At3g10380 | Exocyst Complex Component-Related                                                  | 0.0424 | 0.0457 | 2.65  |
| 245979_at   | At5g13150 | Exocyst Subunit Exo70 Family Protein                                               | 0.0270 | 0.0361 | 7.85  |
| 261266_at   | At1g26770 | Expansin, Putative (Exp10)                                                         | 0.0372 | 0.0425 | 2.68  |
| 261226_at   | At1g20190 | Expansin, Putative (Exp11)                                                         | 0.0035 | 0.0135 | 3.61  |
| 266770_at   | At2g03090 | Expansin, Putative (Exp15)                                                         | 0.0022 | 0.0107 | 3.20  |
| 249501_s_at | At5g39270 | Expansin, Putative (Exp22)                                                         | 0.0345 | 0.0410 | 5.28  |
| 267158_at   | At2g37640 | Expansin, Putative (Exp3)                                                          | 0.0288 | 0.0373 | 4.33  |
| 258003_at   | At3g29030 | Expansin, Putative (Exp5)                                                          | 0.0260 | 0.0354 | 2.64  |
| 258267_at   | At3g15870 | Fatty Acid Desaturase Family Protein                                               | 0.0004 | 0.0050 | 16.24 |
| 258555_at   | At3g06860 | Fatty Acid Multifunctional Protein (Mfp2)                                          | 0.0194 | 0.0304 | 4.65  |
| 258911_at   | At3g06470 | Gns1/Sur4 Membrane Family Protein                                                  | 0.0273 | 0.0363 | 2.54  |
| 253842_at   | At4g27860 | Integral Membrane Family Protein                                                   | 0.0498 | 0.0499 | 9.27  |
| 252002_at   | At3g52760 | Integral Membrane Yip1 Family Protein                                              | 0.0142 | 0.0262 | 2.72  |
| 266595_at   | At2g46180 | Intracellular Protein Transport Protein Uso1-Related                               | 0.0176 | 0.0290 | 2.75  |
| 260820_at   | At1g06840 | Leucine-Rich Repeat Transmembrane Protein Kinase, Putative                         | 0.0056 | 0.0167 | 3.37  |
| 263913_at   | At2g36570 | Leucine-Rich Repeat Transmembrane Protein Kinase, Putative                         | 0.0088 | 0.0205 | 2.63  |
| 258684_at   | At3g08680 | Leucine-Rich Repeat Transmembrane Protein Kinase, Putative                         | 0.0228 | 0.0332 | 2.92  |
| 257297_at   | At3g28040 | Leucine-Rich Repeat Transmembrane Protein Kinase, Putative                         | 0.0012 | 0.0083 | 3.88  |
| 251718_at   | At3g56100 | Leucine-Rich Repeat Transmembrane Protein Kinase, Putative                         | 0.0018 | 0.0098 | 9.86  |
| 251714_at   | At3g56370 | Leucine-Rich Repeat Transmembrane Protein Kinase, Putative                         | 0.0047 | 0.0154 | 3.02  |
| 251075_at   | At5g01890 | Leucine-Rich Repeat Transmembrane Protein Kinase, Putative                         | 0.0041 | 0.0146 | 3.06  |
| 250462_at   | At5g10020 | Leucine-Rich Repeat Transmembrane Protein Kinase, Putative                         | 0.0005 | 0.0055 | 5.93  |
| 250102_at   | At5g16590 | Leucine-Rich Repeat Transmembrane Protein Kinase, Putative                         | 0.0051 | 0.0160 | 3.71  |
| 248590_at   | At5g49660 | Leucine-Rich Repeat Transmembrane Protein Kinase, Putative                         | 0.0110 | 0.0230 | 7.24  |
| 248237_at   | At5g53890 | Leucine-Rich Repeat Transmembrane Protein Kinase, Putative                         | 0.0139 | 0.0259 | 2.64  |
| 247527_at   | At5g61480 | Leucine-Rich Repeat Transmembrane Protein Kinase, Putative                         | 0.0300 | 0.0381 | 4.08  |
| 246986_at   | At5g67280 | Leucine-Rich Repeat Transmembrane Protein Kinase, Putative                         | 0.0072 | 0.0186 | 2.94  |
| 256398_at   | At3g06100 | Major Intrinsic Family Protein / Mip Family Protein                                | 0.0040 | 0.0145 | 3.32  |
| 263867_at   | At2g36830 | Major Intrinsic Family Protein / Mip Family Protein                                | 0.0001 | 0.0019 | 5.91  |
| 257213_at   | At3g15020 | Malate Dehydrogenase (Nad), Mitochondrial, Putative                                | 0.0014 | 0.0089 | 2.77  |
| 262569_at   | At1g15180 | Mate Efflux Family Protein                                                         | 0.0007 | 0.0065 | 3.56  |
| 261880_at   | At1g50500 | Membrane Trafficking Vps53 Family Protein                                          | 0.0006 | 0.0060 | 2.65  |
| 263118_at   | At1g03090 | Methylcrotonyl-Coa Carboxylase Alpha Chain, Mitochondrial                          | 0.0118 | 0.0239 | 2.97  |
| 253279_at   | At4g34030 | Methylcrotonyl-Coa Carboxylase Beta Chain, Mitochondrial                           | 0.0002 | 0.0039 | 2.86  |
| 258862_at   | At3g02090 | Mitochondrial Processing Peptidase Beta Subunit, Putative                          | 0.0250 | 0.0347 | 2.66  |
| 249224_at   | At5g42130 | Mitochondrial Substrate Carrier Family Protein                                     | 0.0097 | 0.0216 | 2.77  |
| 263943_at   | At2g35800 | Mitochondrial Substrate Carrier Family Protein                                     | 0.0049 | 0.0158 | 2.50  |
| 249900_at   | At5g22640 | Morn (Membrane Occupation And Recognition Nexus) Repeat-Containing Protein         | 0.0185 | 0.0299 | 3.21  |
| 249627_at   | At5g37510 | Nadh-Ubiquinone Dehydrogenase, Mitochondrial, Putative                             | 0.0224 | 0.0329 | 3.84  |
| 250334_at   | At5g11770 | Nadh-Ubiquinone Oxidoreductase 20 Kda Subunit, Mitochondrial                       | 0.0332 | 0.0401 | 3.05  |
| 256277_at   | At3g12120 | Omega-6 Fatty Acid Desaturase, Endoplasmic Reticulum (Fad2) / Delta-12 Desaturase  | 0.0327 | 0.0398 | 4.63  |
| 259532_at   | At1g12470 | Pep3/Vps18/Deep Orange Family Protein                                              | 0.0302 | 0.0382 | 2.58  |
| 249990_at   | At5g18540 | Periplasmic Cytochrome C-Related                                                   | 0.0214 | 0.0319 | 4.21  |
| 251993_at   | At3g52960 | Peroxiredoxin Type 2, Putative                                                     | 0.0068 | 0.0181 | 2.57  |
| 247422_at   | At5g62810 | Peroxisomal Protein (Pex14)                                                        | 0.0407 | 0.0448 | 4.19  |
| 248010_at   | At5g56290 | Peroxisomal Targeting Signal Type 1 Receptor (Pex5)                                | 0.0093 | 0.0211 | 2.58  |
| 259430_at   | At1g01610 | Phospholipid/Glycerol Acyltransferase Family Protein                               | 0.0498 | 0.0499 | 4.83  |
| 255674_at   | At4g00430 | Plasma Membrane Intrinsic Protein, Putative                                        | 0.0275 | 0.0365 | 3.31  |
| 249009_at   | At5g44610 | Plasma Membrane Polypeptide-Related                                                | 0.0062 | 0.0174 | 6.87  |
| 259504_at   | At1g15690 | Pyrophosphate-Energized Vacuolar Membrane Proton Pump                              | 0.0351 | 0.0413 | 4.16  |
| 264871_at   | At1g24180 | Pyruvate Dehydrogenase E1 Component Alpha Subunit, Mitochondrial, Putative         | 0.0221 | 0.0326 | 2.50  |
| 265822_at   | At2g17980 | Sec1 Family Protein                                                                | 0.0009 | 0.0073 | 3.48  |
| 247632_at   | At5g60460 | Sec61Beta Family Protein                                                           | 0.0005 | 0.0054 | 5.80  |
| 247060_at   | At5g66760 | Succinate Dehydrogenase (Ubiquinone) Flavoprotein Subunit, Mitochondrial           | 0.0001 | 0.0021 | 3.01  |
| 265329_at   | At2g18450 | Succinate Dehydrogenase (Ubiquinone) Flavoprotein Subunit, Mitochondrial, Putative | 0.0244 | 0.0343 | 6.01  |
| 256387_at   | At3g06170 | Tms Membrane Family Protein / Tumour Differentially Expressed (Tde) Family Protein | 0.0417 | 0.0454 | 3.48  |
| 257357_at   | At2g41050 | Transmembrane Family Protein                                                       | 0.0136 | 0.0257 | 7.13  |
| 261783_at   | At1g08190 | Vacuolar Assembly Protein, Putative (Vps41)                                        | 0.0473 | 0.0485 | 6.59  |
| 264302_at   | At1g78900 | Vacuolar Atp Synthase Catalytic Subunit A / V-Atpase A Subunit                     | 0.0026 | 0.0118 | 4.07  |
| 252998_at   | At4g38510 | Vacuolar Atp Synthase Subunit B, Putative / V-Atpase B Subunit                     | 0.0354 | 0.0415 | 3.56  |
| 252027_at   | At3g52850 | Vacuolar Sorting Receptor, Putative                                                | 0.0002 | 0.0040 | 2.54  |
| 257971_at   | At3g27530 | Vesicle Tethering Family Protein                                                   | 0.0103 | 0.0222 | 10.32 |

F. Proteins with binding function or cofactor requirement

|             |           |                                                                                |        |        |       |
|-------------|-----------|--------------------------------------------------------------------------------|--------|--------|-------|
| 251256_at   | At3g62300 | Agenet Domain-Containing Protein                                               | 0.0081 | 0.0197 | 10.44 |
| 245415_at   | At4g17330 | Agenet Domain-Containing Protein                                               | 0.0161 | 0.0279 | 6.61  |
| 260921_at   | At1g21540 | Amp-Binding Protein, Putative                                                  | 0.0456 | 0.0478 | 4.35  |
| 245807_at   | At1g46768 | Ap2 Domain-Containing Protein Rap2.1 (Rap2.1)                                  | 0.0080 | 0.0197 | 4.15  |
| 262197_at   | At1g53910 | Ap2 Domain-Containing Protein Rap2.12 (Rap2.12)                                | 0.0480 | 0.0489 | 4.91  |
| 258366_at   | At3g14230 | Ap2 Domain-Containing Protein Rap2.2 (Rap2.2)                                  | 0.0120 | 0.0241 | 4.90  |
| 263486_at   | At2g22200 | Ap2 Domain-Containing Transcription Factor                                     | 0.0067 | 0.0180 | 3.79  |
| 262135_at   | At1g78080 | Ap2 Domain-Containing Transcription Factor Rap2.4                              | 0.0222 | 0.0326 | 3.23  |
| 252486_at   | At3g46510 | Armadillo/Beta-Catenin Repeat Family Protein                                   | 0.0385 | 0.0435 | 2.68  |
| 251407_at   | At3g60350 | Armadillo/Beta-Catenin Repeat Family Protein / F-Box Family Protein            | 0.0353 | 0.0414 | 4.90  |
| 266727_at   | At2g03150 | Atp/Gtp-Binding Protein Family                                                 | 0.0168 | 0.0283 | 5.21  |
| 256308_s_at | At1g30410 | Atp-Binding Cassette Transport Protein, Putative                               | 0.0000 | 0.0010 | 16.99 |
| 253085_s_at | At4g36270 | Atp-Binding Region, Atpase-Like Domain-Containing Protein                      | 0.0409 | 0.0449 | 4.59  |
| 248487_at   | At5g1070  | Atp-Dependent Clp Protease Atp-Binding Subunit (Clpd), (Erd1)                  | 0.0120 | 0.0240 | 2.91  |
| 248480_at   | At5g50920 | Atp-Dependent Clp Protease Atp-Binding Subunit / Clpc                          | 0.0003 | 0.0043 | 4.21  |
| 255586_at   | At4g01560 | Brix Domain-Containing Protein                                                 | 0.0213 | 0.0319 | 2.64  |
| 252402_s_at | At3g48050 | Bromo-Adjacent Homology (Bah) Domain-Containing Protein                        | 0.0491 | 0.0495 | 3.84  |
| 266580_at   | At2g46260 | Btb/Poz Domain-Containing Protein                                              | 0.0331 | 0.0399 | 2.53  |
| 251328_at   | At3g61600 | Btb/Poz Domain-Containing Protein                                              | 0.0001 | 0.0022 | 2.62  |
| 263205_at   | At1g05500 | C2 Domain-Containing Protein                                                   | 0.0007 | 0.0064 | 3.45  |
| 261935_at   | At1g22610 | C2 Domain-Containing Protein                                                   | 0.0013 | 0.0084 | 2.53  |
| 260719_at   | At1g48090 | C2 Domain-Containing Protein                                                   | 0.0139 | 0.0258 | 3.23  |
| 260511_at   | At1g51570 | C2 Domain-Containing Protein                                                   | 0.0033 | 0.0132 | 3.91  |
| 262209_at   | At1g74720 | C2 Domain-Containing Protein                                                   | 0.0011 | 0.0081 | 3.25  |
| 259222_at   | At3g03680 | C2 Domain-Containing Protein                                                   | 0.0022 | 0.0106 | 2.72  |
| 251364_at   | At3g61300 | C2 Domain-Containing Protein                                                   | 0.0095 | 0.0213 | 6.12  |
| 248731_at   | At5g48060 | C2 Domain-Containing Protein                                                   | 0.0122 | 0.0244 | 8.30  |
| 265388_s_at | At2g20990 | C2 Domain-Containing Protein (Syta)                                            | 0.0022 | 0.0108 | 2.72  |
| 259731_at   | At1g77460 | C2 Domain-Containing Protein / Armadillo/Beta-Catenin Repeat Family Protein    | 0.0005 | 0.0054 | 2.87  |
| 264568_at   | At1g05150 | Calcium-Binding Ef Hand Family Protein                                         | 0.0010 | 0.0074 | 3.13  |
| 262492_at   | At1g21630 | Calcium-Binding Ef Hand Family Protein                                         | 0.0000 | 0.0019 | 2.81  |
| 261421_at   | At1g18840 | Calmodulin-Binding Family Protein                                              | 0.0366 | 0.0422 | 3.28  |
| 262210_at   | At1g74690 | Calmodulin-Binding Family Protein                                              | 0.0017 | 0.0097 | 7.12  |
| 260610_at   | At2g43680 | Calmodulin-Binding Family Protein                                              | 0.0000 | 0.0018 | 3.21  |
| 257229_at   | At3g16490 | Calmodulin-Binding Family Protein                                              | 0.0096 | 0.0215 | 5.28  |
| 250613_at   | At5g07240 | Calmodulin-Binding Family Protein                                              | 0.0025 | 0.0115 | 6.31  |
| 249709_at   | At5g35670 | Calmodulin-Binding Family Protein                                              | 0.0001 | 0.0019 | 7.63  |
| 247990_at   | At5g56360 | Calmodulin-Binding Protein                                                     | 0.0013 | 0.0086 | 6.03  |
| 247270_at   | At5g64220 | Calmodulin-Binding Protein                                                     | 0.0078 | 0.0194 | 3.31  |
| 256764_at   | At3g29310 | Calmodulin-Binding Protein-Related                                             | 0.0094 | 0.0212 | 3.02  |
| 259438_at   | At1g01510 | C-Terminal Binding Protein (Angustifolia)                                      | 0.0015 | 0.0091 | 4.88  |
| 258324_at   | At3g22780 | Cxc Domain Protein (Tso1)                                                      | 0.0037 | 0.0140 | 2.62  |
| 258660_at   | At3g09850 | D111/G-Patch Domain-Containing Protein                                         | 0.0008 | 0.0071 | 2.99  |
| 265123_at   | At1g55440 | Dc1 Domain-Containing Protein                                                  | 0.0041 | 0.0145 | 5.68  |
| 264534_at   | At1g55700 | Dc1 Domain-Containing Protein                                                  | 0.0300 | 0.0381 | 6.41  |
| 267478_at   | At2g02700 | Dc1 Domain-Containing Protein                                                  | 0.0002 | 0.0038 | 3.01  |
| 251501_at   | At3g59120 | Dc1 Domain-Containing Protein                                                  | 0.0007 | 0.0065 | 3.91  |
| 251502_at   | At3g59130 | Dc1 Domain-Containing Protein                                                  | 0.0165 | 0.0282 | 8.81  |
| 261036_at   | At1g17470 | Developmentally Regulated Gtp-Binding Protein (Drg1)                           | 0.0487 | 0.0494 | 4.47  |
| 251664_at   | At3g56940 | Dicarboxylate Diiron Protein, Putative (Crd1)                                  | 0.0284 | 0.0371 | 2.53  |
| 247370_at   | At5g63320 | DNA-binding Bromodomain containing protein                                     | 0.0008 | 0.0071 | 3.79  |
| 267386_at   | At2g44430 | DNA-binding Bromodomain containing protein                                     | 0.0005 | 0.0056 | 13.46 |
| 259164_at   | At3g01770 | DNA-binding Bromodomain containing protein                                     | 0.0040 | 0.0145 | 2.58  |
| 250424_at   | At5g10550 | DNA-binding Bromodomain containing protein                                     | 0.0092 | 0.0209 | 2.66  |
| 247147_at   | At5g65630 | DNA-binding Bromodomain containing protein                                     | 0.0177 | 0.0291 | 3.04  |
| 261548_at   | At1g63480 | DNA-Binding Family Protein                                                     | 0.0002 | 0.0035 | 10.57 |
| 258819_at   | At3g04590 | DNA-Binding Family Protein                                                     | 0.0019 | 0.0101 | 2.79  |
| 262586_at   | At1g15480 | DNA-Binding Family Protein                                                     | 0.0000 | 0.0000 | 11.43 |
| 260331_at   | At1g80270 | DNA-Binding Family Protein                                                     | 0.0461 | 0.0479 | 4.28  |
| 249677_at   | At5g35970 | Dna-Binding Protein, Putative                                                  | 0.0228 | 0.0331 | 2.98  |
| 247452_at   | At5g62430 | Dof-Type Zinc Finger Domain-Containing Protein                                 | 0.0460 | 0.0479 | 8.40  |
| 252429_at   | At3g47500 | Dof-Type Zinc Finger Domain-Containing Protein                                 | 0.0036 | 0.0136 | 5.63  |
| 256430_at   | At3g11020 | Dre-Binding Protein (Dreb2B)                                                   | 0.0371 | 0.0425 | 2.78  |
| 251138_at   | At5g01160 | E-Cadherin Binding Protein-Related                                             | 0.0075 | 0.0190 | 2.57  |
| 256119_at   | At1g18070 | Ef-1-Alpha-Related Gtp-Binding Protein, Putative                               | 0.0052 | 0.0162 | 3.26  |
| 262017_at   | At1g35550 | Elongation Factor Tu C-Terminal Domain-Containing Protein                      | 0.0000 | 0.0004 | 3.15  |
| 250274_at   | At5g13020 | Emsy N Terminus Domain-Containing Protein / Ent Domain-Containing Protein      | 0.0066 | 0.0179 | 2.65  |
| 266328_at   | At2g01600 | Epsin N-Terminal Homology (Enth) Domain-Containing Protein                     | 0.0118 | 0.0238 | 2.68  |
| 247941_at   | At5g57200 | Epsin N-Terminal Homology (Enth) Domain-Containing Protein                     | 0.0274 | 0.0363 | 3.25  |
| 257053_at   | At3g15210 | Ethylene-Responsive Element-Binding Factor 4 (Erf4)                            | 0.0433 | 0.0463 | 3.73  |
| 253257_at   | At4g34390 | Extra-Large Guanine Nucleotide Binding Protein, Putative / G-Protein, Putative | 0.0193 | 0.0303 | 2.79  |



|             |           |                                                                                     |        |        |       |
|-------------|-----------|-------------------------------------------------------------------------------------|--------|--------|-------|
| 263228_at   | At1g30700 | Fad-Binding Domain-Containing Protein                                               | 0.0454 | 0.0477 | 4.36  |
| 264527_at   | At1g30760 | Fad-Binding Domain-Containing Protein                                               | 0.0016 | 0.0095 | 5.23  |
| 251178_at   | At3g63440 | Fad-Binding Domain-Containing Protein / Cytokinin Oxidase Family Protein            | 0.0105 | 0.0224 | 4.86  |
| 265814_at   | At2g17930 | Fat Domain-Containing Protein / Phosphatidylinositol 3- And 4-Kinase Family Protein | 0.0056 | 0.0167 | 2.87  |
| 257963_at   | At3g19840 | Ff Domain-Containing Protein / Ww Domain-Containing Protein                         | 0.0002 | 0.0037 | 2.68  |
| 245137_at   | At2g45460 | Forkhead-Associated Domain-Containing Protein / Fha Domain-Containing Protein       | 0.0075 | 0.0190 | 2.58  |
| 258822_s_at | At3g07260 | Forkhead-Associated Domain-Containing Protein / Fha Domain-Containing Protein       | 0.0125 | 0.0246 | 2.65  |
| 248771_at   | At5g47790 | Forkhead-Associated Domain-Containing Protein / Fha Domain-Containing Protein       | 0.0412 | 0.0451 | 2.91  |
| 246261_at   | At1g31810 | Formin Homology 2 Domain-Containing Protein / Fh2 Domain-Containing Protein         | 0.0076 | 0.0191 | 3.03  |
| 260565_at   | At2g43800 | Formin Homology 2 Domain-Containing Protein / Fh2 Domain-Containing Protein         | 0.0093 | 0.0210 | 2.63  |
| 257912_at   | At3g25500 | Formin Homology 2 Domain-Containing Protein / Fh2 Domain-Containing Protein         | 0.0028 | 0.0123 | 2.52  |
| 248696_at   | At5g48360 | Formin Homology 2 Domain-Containing Protein / Fh2 Domain-Containing Protein         | 0.0032 | 0.0131 | 5.02  |
| 246995_at   | At5g67470 | Formin Homology 2 Domain-Containing Protein / Fh2 Domain-Containing Protein         | 0.0006 | 0.0058 | 2.76  |
| 245714_at   | At5g04280 | Glycine-Rich Rna-Binding Protein                                                    | 0.0043 | 0.0149 | 2.79  |
| 252885_at   | At4g39260 | Glycine-Rich Rna-Binding Protein 8 (Grp8) (Ccr1)                                    | 0.0085 | 0.0201 | 3.50  |
| 264921_at   | At1g60650 | Glycine-Rich Rna-Binding Protein, Putative                                          | 0.0012 | 0.0083 | 3.19  |
| 247891_at   | At5g57960 | Gtp-Binding Family Protein                                                          | 0.0344 | 0.0409 | 3.39  |
| 265154_at   | At1g30960 | Gtp-Binding Protein (Erg)                                                           | 0.0009 | 0.0072 | 4.67  |
| 256207_at   | At1g50920 | Gtp-Binding Protein-Related                                                         | 0.0010 | 0.0074 | 4.89  |
| 251158_at   | At3g63150 | Gtp-Binding Protein-Related                                                         | 0.0048 | 0.0155 | 4.14  |
| 256144_at   | At1g48630 | Guanine Nucleotide-Binding Family Protein                                           | 0.0231 | 0.0333 | 2.69  |
| 248933_at   | At5g46070 | Guanylate-Binding Family Protein                                                    | 0.0003 | 0.0045 | 4.27  |
| 256823_at   | At3g22220 | Hat Dimerisation Domain-Containing Protein                                          | 0.0053 | 0.0163 | 2.56  |
| 252947_at   | At4g38600 | Hect-Domain-Containing Protein / Ubiquitin-Transferase Family Protein               | 0.0044 | 0.0150 | 5.61  |
| 255444_at   | At4g02560 | Homeobox Protein Luminidependens (Ld)                                               | 0.0028 | 0.0123 | 3.20  |
| 263956_at   | At2g35940 | Homeodomain-Containing Protein                                                      | 0.0108 | 0.0228 | 6.00  |
| 259927_at   | At1g75100 | J-domain of auxilin                                                                 | 0.0066 | 0.0179 | 2.70  |
| 261988_at   | At1g33680 | KH Domain-Containing Protein                                                        | 0.0036 | 0.0137 | 5.01  |
| 266846_at   | At2g25970 | KH Domain-Containing Protein                                                        | 0.0331 | 0.0400 | 4.78  |
| 258790_at   | At3g04610 | KH Domain-Containing Protein                                                        | 0.0051 | 0.0160 | 2.83  |
| 255136_s_at | At4g08350 | Kow Domain-Containing Transcription Factor Family Protein                           | 0.0000 | 0.0003 | 2.54  |
| 267214_at   | At2g43970 | La Domain-Containing Protein                                                        | 0.0011 | 0.0078 | 2.73  |
| 266544_at   | At2g35300 | Late Embryogenesis Abundant Group 1 Domain-Containing Protein                       | 0.0289 | 0.0373 | 6.56  |
| 247103_at   | At5g66610 | Lim Domain-Containing Protein                                                       | 0.0235 | 0.0337 | 4.06  |
| 262704_at   | At1g16530 | Lob Domain Protein 3 / Lateral Organ Boundaries Domain Protein 3 (Lbd3)             | 0.0113 | 0.0233 | 2.55  |
| 264626_at   | At1g65620 | Lob Domain Protein 6 / Lateral Organ Boundaries Domain Protein 6 (Lbd6)             | 0.0392 | 0.0438 | 3.33  |
| 259055_at   | At3g03340 | Luc7 N_Terminus Domain-Containing Protein                                           | 0.0012 | 0.0084 | 2.68  |
| 246436_at   | At5g17440 | Luc7 N_Terminus Domain-Containing Protein                                           | 0.0390 | 0.0438 | 11.06 |
| 254089_at   | At4g24800 | Ma3 Domain-Containing Protein                                                       | 0.0005 | 0.0055 | 7.97  |
| 250066_at   | At5g17930 | Ma3 Domain-Containing Protein                                                       | 0.0101 | 0.0220 | 10.51 |
| 258333_at   | At3g16000 | Matrix-Localized Mar Dna-Binding Protein-Related                                    | 0.0050 | 0.0158 | 5.14  |
| 263654_at   | At1g04300 | Meprin And Traf Homology Domain-Containing Protein                                  | 0.0287 | 0.0372 | 2.72  |
| 257673_at   | At3g20370 | Meprin And Traf Homology Domain-Containing Protein                                  | 0.0119 | 0.0239 | 2.80  |
| 249100_at   | At5g43560 | Meprin And Traf Homology Domain-Containing Protein                                  | 0.0082 | 0.0199 | 4.07  |
| 262600_at   | At1g15340 | Methyl-Cpg-Binding Domain-Containing Protein                                        | 0.0082 | 0.0199 | 4.97  |
| 258264_at   | At3g15790 | Methyl-Cpg-Binding Domain-Containing Protein                                        | 0.0015 | 0.0091 | 3.34  |
| 264471_at   | At1g67120 | Midasin-Related                                                                     | 0.0414 | 0.0452 | 5.15  |
| 261885_at   | At1g80930 | Mif4G Domain-Containing Protein / Ma3 Domain-Containing Protein                     | 0.0080 | 0.0196 | 4.31  |
| 251431_at   | At3g60240 | Mif4G Domain-Containing Protein / Ma3 Domain-Containing Protein                     | 0.0148 | 0.0268 | 5.42  |
| 263727_at   | At2g13540 | Mrna Cap-Binding Protein (Abh1)                                                     | 0.0020 | 0.0105 | 2.91  |
| 251157_at   | At3g63140 | Mrna-Binding Protein, Putative                                                      | 0.0289 | 0.0373 | 2.59  |
| 264048_at   | At2g22400 | Nol1/Nop2/Sun Family Protein                                                        | 0.0080 | 0.0197 | 2.66  |
| 245387_at   | At4g17520 | Nuclear Rna-Binding Protein, Putative                                               | 0.0005 | 0.0055 | 3.50  |
| 256605_at   | At3g32940 | Nucleic acid binding                                                                | 0.0054 | 0.0164 | 3.26  |
| 250516_at   | At5g09620 | Octicosapeptide/Phox/Bem1P (Pb1) Domain-Containing Protein                          | 0.0007 | 0.0064 | 3.07  |
| 261040_at   | At1g17370 | Oligouridylate-Binding Protein, Putative                                            | 0.0112 | 0.0232 | 4.25  |
| 262548_at   | At1g31280 | Paz Domain-Containing Protein / Piwi Domain-Containing Protein                      | 0.0002 | 0.0037 | 2.53  |
| 263586_at   | At2g25350 | Phox (Px) Domain-Containing Protein                                                 | 0.0232 | 0.0334 | 10.56 |
| 247822_at   | At5g58440 | Phox (Px) Domain-Containing Protein                                                 | 0.0042 | 0.0147 | 3.52  |
| 261975_at   | At1g64640 | Plastocyanin-Like Domain-Containing Protein                                         | 0.0035 | 0.0135 | 11.46 |
| 248236_at   | At5g53870 | Plastocyanin-Like Domain-Containing Protein                                         | 0.0167 | 0.0283 | 3.87  |
| 264111_at   | At2g13690 | PriI-Interacting Factor, Putative                                                   | 0.0232 | 0.0334 | 2.50  |
| 262348_at   | At2g48160 | Pwyp Domain-Containing Protein                                                      | 0.0114 | 0.0234 | 5.14  |
| 249281_at   | At5g41940 | Rabgap/Tbc Domain-Containing Protein                                                | 0.0040 | 0.0145 | 3.08  |
| 267562_at   | At2g39670 | Radical Sam Domain-Containing Protein                                               | 0.0081 | 0.0197 | 4.01  |
| 256343_at   | At1g72090 | Radical Sam Domain-Containing Protein / Tram Domain-Containing Protein              | 0.0003 | 0.0043 | 3.84  |
| 254844_at   | At4g11790 | Ran-Binding Protein 1 Domain-Containing Protein                                     | 0.0136 | 0.0257 | 4.62  |
| 264395_at   | At1g12070 | Rho Gdp-Dissociation Inhibitor Family Protein                                       | 0.0417 | 0.0453 | 2.70  |
| 254021_at   | At4g25650 | Rieske (2Fe-2S) Domain-Containing Protein                                           | 0.0270 | 0.0361 | 2.64  |
| 263533_at   | At2g24820 | Rieske (2Fe-2S) Domain-Containing Protein                                           | 0.0148 | 0.0268 | 3.41  |
| 262824_at   | At1g11650 | Rna-Binding Protein 45 (Rbp45), Putative                                            | 0.0461 | 0.0479 | 2.63  |
| 262433_s_at | At1g47500 | Rna-Binding Protein 47 (Rbp47), Putative                                            | 0.0088 | 0.0205 | 3.21  |
| 265966_at   | At2g37220 | Rna-Binding Protein Cp29, Putative                                                  | 0.0077 | 0.0193 | 3.16  |
| 264822_at   | At1g03457 | Rna-Binding Protein, Putative                                                       | 0.0121 | 0.0242 | 3.11  |

|             |           |                                                                                 |        |        |       |
|-------------|-----------|---------------------------------------------------------------------------------|--------|--------|-------|
| 264069_at   | At2g28000 | Rubisco Subunit Binding-Protein Alpha Subunit, Chloroplast                      | 0.0215 | 0.0321 | 3.06  |
| 261206_at   | At1g12800 | S1 Rna-Binding Domain-Containing Protein                                        | 0.0034 | 0.0133 | 3.62  |
| 258573_at   | At3g04260 | Sap Domain-Containing Protein                                                   | 0.0171 | 0.0286 | 2.67  |
| 264480_at   | At1g77300 | Set Domain-Containing Protein                                                   | 0.0309 | 0.0387 | 2.53  |
| 267290_at   | At2g23750 | Set Domain-Containing Protein                                                   | 0.0166 | 0.0282 | 2.92  |
| 250170_at   | At5g14260 | Set Domain-Containing Protein                                                   | 0.0197 | 0.0307 | 2.94  |
| 254745_at   | At4g13460 | Set Domain-Containing Protein (Suvh9)                                           | 0.0026 | 0.0118 | 3.49  |
| 262798_at   | At1g20980 | Spl1-Related2 Protein (Spl1R2)                                                  | 0.0002 | 0.0040 | 2.61  |
| 261872_s_at | At1g11520 | Spliceosome Associated Protein-Related                                          | 0.0042 | 0.0147 | 3.28  |
| 259107_at   | At3g05460 | Sporozoite Surface Protein-Related                                              | 0.0192 | 0.0303 | 9.08  |
| 251450_at   | At3g60030 | Squamosa Promoter-Binding Protein-Like 12 (Spl12)                               | 0.0390 | 0.0438 | 2.90  |
| 249793_at   | At5g23680 | Sterile Alpha Motif (Sam) Domain-Containing Protein                             | 0.0002 | 0.0034 | 2.50  |
| 250218_at   | At5g14170 | Swib Complex Baf60B Domain-Containing Protein                                   | 0.0011 | 0.0078 | 2.99  |
| 252504_at   | At3g46590 | Telomere Repeat-Binding Protein, Putative                                       | 0.0064 | 0.0177 | 3.53  |
| 251909_at   | At3g53790 | Telomere-Binding Protein, Putative                                              | 0.0276 | 0.0365 | 6.20  |
| 258219_at   | At3g17880 | Tetratricoredoxin (Tdx)                                                         | 0.0040 | 0.0144 | 2.96  |
| 254916_at   | At4g11340 | Toll-Interleukin-Resistance (Tir) Domain-Containing Protein                     | 0.0215 | 0.0321 | 3.23  |
| 264649_at   | At1g09060 | Transcription Factor Jumonji (Jmjc) Domain-Containing Protein                   | 0.0000 | 0.0017 | 2.93  |
| 260627_at   | At1g62310 | Transcription Factor Jumonji (Jmjc) Domain-Containing Protein                   | 0.0168 | 0.0283 | 2.99  |
| 259252_at   | At3g07610 | Transcription Factor Jumonji (Jmjc) Domain-Containing Protein                   | 0.0217 | 0.0322 | 16.24 |
| 254412_at   | At4g21430 | Transcription Factor Jumonji (Jmjc) Domain-Containing Protein                   | 0.0349 | 0.0412 | 5.25  |
| 245935_at   | At5g19840 | Transcription Factor Jumonji (Jmjc) Domain-Containing Protein                   | 0.0283 | 0.0370 | 2.98  |
| 266407_at   | At2g38560 | Transcription Factor S-Ii (Tfiis) Domain-Containing Protein                     | 0.0083 | 0.0200 | 2.74  |
| 263261_at   | At1g10580 | Transducin Family Protein / Wd-40 Repeat Family Protein                         | 0.0109 | 0.0229 | 3.01  |
| 262395_at   | At1g49540 | Transducin Family Protein / Wd-40 Repeat Family Protein                         | 0.0004 | 0.0050 | 4.64  |
| 265259_at   | At2g20330 | Transducin Family Protein / Wd-40 Repeat Family Protein                         | 0.0013 | 0.0085 | 4.70  |
| 255830_at   | At2g33340 | Transducin Family Protein / Wd-40 Repeat Family Protein                         | 0.0017 | 0.0097 | 3.39  |
| 263824_at   | At2g40360 | Transducin Family Protein / Wd-40 Repeat Family Protein                         | 0.0059 | 0.0171 | 3.95  |
| 260606_at   | At2g43770 | Transducin Family Protein / Wd-40 Repeat Family Protein                         | 0.0245 | 0.0343 | 2.76  |
| 257684_s_at | At3g13290 | Transducin Family Protein / Wd-40 Repeat Family Protein                         | 0.0357 | 0.0416 | 7.57  |
| 256967_at   | At3g21060 | Transducin Family Protein / Wd-40 Repeat Family Protein                         | 0.0026 | 0.0118 | 4.98  |
| 258166_at   | At3g21540 | Transducin Family Protein / Wd-40 Repeat Family Protein                         | 0.0328 | 0.0398 | 5.84  |
| 252273_at   | At3g49660 | Transducin Family Protein / Wd-40 Repeat Family Protein                         | 0.0040 | 0.0145 | 5.63  |
| 250222_at   | At5g14050 | Transducin Family Protein / Wd-40 Repeat Family Protein                         | 0.0058 | 0.0169 | 4.08  |
| 249798_at   | At5g23730 | Transducin Family Protein / Wd-40 Repeat Family Protein                         | 0.0009 | 0.0071 | 2.83  |
| 245861_at   | At5g28300 | Trihelix Dna-Binding Protein, Putative                                          | 0.0000 | 0.0015 | 2.74  |
| 247517_at   | At5g61780 | Tudor Domain-Containing Protein / Nuclease Family Protein                       | 0.0000 | 0.0005 | 4.03  |
| 250626_at   | At5g07350 | Tudor Domain-Containing Protein / Nuclease Family Protein                       | 0.0006 | 0.0060 | 2.89  |
| 246541_at   | At5g15400 | U-Box Domain-Containing Protein                                                 | 0.0057 | 0.0169 | 2.98  |
| 259605_at   | At1g27910 | U-Box Domain-Containing Protein                                                 | 0.0003 | 0.0046 | 15.60 |
| 261597_at   | At1g49780 | U-Box Domain-Containing Protein                                                 | 0.0088 | 0.0205 | 2.86  |
| 246292_at   | At3g56860 | Ubp1 Interacting Protein 2A (Uba2A)                                             | 0.0188 | 0.0300 | 5.83  |
| 245557_at   | At4g15410 | Ubx Domain-Containing Protein                                                   | 0.0020 | 0.0104 | 4.11  |
| 254936_at   | At4g10790 | Ubx Domain-Containing Protein                                                   | 0.0002 | 0.0037 | 3.19  |
| 254452_at   | At4g21100 | Uv-Damaged Dna-Binding Protein, Putative                                        | 0.0098 | 0.0217 | 3.40  |
| 253418_at   | At4g32760 | Vhs Domain-Containing Protein / Gat Domain-Containing Protein                   | 0.0297 | 0.0379 | 4.93  |
| 260276_at   | At1g80450 | Vq Motif-Containing Protein                                                     | 0.0001 | 0.0019 | 21.94 |
| 259501_at   | At1g15750 | Wd-40 Repeat Family Protein                                                     | 0.0332 | 0.0400 | 4.29  |
| 264548_at   | At1g55680 | Wd-40 Repeat Family Protein                                                     | 0.0004 | 0.0048 | 2.55  |
| 258268_at   | At3g15880 | Wd-40 Repeat Family Protein                                                     | 0.0459 | 0.0479 | 2.81  |
| 257553_at   | At3g16830 | Wd-40 Repeat Family Protein                                                     | 0.0248 | 0.0346 | 3.32  |
| 254871_at   | At4g11920 | Wd-40 Repeat Family Protein                                                     | 0.0040 | 0.0145 | 5.02  |
| 248198_at   | At5g54200 | Wd-40 Repeat Family Protein                                                     | 0.0044 | 0.0149 | 8.64  |
| 256072_at   | At1g18080 | Wd-40 Repeat Family Protein                                                     | 0.0320 | 0.0393 | 5.40  |
| 267501_at   | At2g45540 | Wd-40 Repeat Family Protein                                                     | 0.0213 | 0.0319 | 3.18  |
| 267102_at   | At2g41500 | Wd-40 Repeat Family Protein                                                     | 0.0148 | 0.0268 | 3.65  |
| 245796_at   | At1g32230 | Wwe Domain-Containing Protein / Ceo Protein, Putative (Ceo)                     | 0.0100 | 0.0219 | 2.55  |
| 261837_s_at | At1g15910 | Xh/Xs Domain-Containing Protein / Xs Zinc Finger Domain-Containing Protein      | 0.0379 | 0.0431 | 2.57  |
| 261891_at   | At1g80790 | Xh/Xs Domain-Containing Protein / Xs Zinc Finger Domain-Containing Protein      | 0.0010 | 0.0077 | 3.05  |
| 249843_at   | At5g23570 | Xs Domain-Containing Protein / Xs Zinc Finger Domain-Containing Protein-Related | 0.0213 | 0.0319 | 3.25  |
| 247555_at   | At5g61020 | Yt521-B-Like Family Protein                                                     | 0.0041 | 0.0145 | 2.65  |
| 264814_at   | At2g17900 | Zinc Finger (Mynd Type) Family Protein / Set Domain-Containing Protein          | 0.0093 | 0.0210 | 5.63  |

#### F1. Metal ion binding/metal binding

|           |           |                                                  |        |        |       |
|-----------|-----------|--------------------------------------------------|--------|--------|-------|
| 249969_at | At5g19090 | Heavy-Metal-Associated Domain-Containing Protein | 0.0162 | 0.0280 | 2.82  |
| 252956_at | At4g38580 | Heavy-Metal-Associated Domain-Containing Protein | 0.0104 | 0.0223 | 2.92  |
| 253516_at | At4g31360 | Selenium binding                                 | 0.0231 | 0.0334 | 13.66 |

#### G. Protein synthesis and translation

|             |           |                                                       |        |        |      |
|-------------|-----------|-------------------------------------------------------|--------|--------|------|
| 260165_at   | At1g79850 | 30S Ribosomal Protein S17, Chloroplast / Cs17 (Rps17) | 0.0005 | 0.0057 | 2.53 |
| 263821_s_at | At2g09990 | 40S Ribosomal Protein S16 (Rps16A)                    | 0.0192 | 0.0303 | 2.66 |
| 246747_at   | At5g27700 | 40S Ribosomal Protein S21 (Rps21C)                    | 0.0116 | 0.0237 | 4.58 |
| 251357_at   | At3g61110 | 40S Ribosomal Protein S27 (Ars27A)                    | 0.0101 | 0.0220 | 3.12 |
| 252693_s_at | At3g44010 | 40S Ribosomal Protein S29 (Rps29B)                    | 0.0004 | 0.0048 | 2.62 |

|                 |           |                                                                                          |        |        |       |
|-----------------|-----------|------------------------------------------------------------------------------------------|--------|--------|-------|
| 253248_at       | At4g34670 | 40S Ribosomal Protein S3A (Rps3Ab)                                                       | 0.0272 | 0.0362 | 2.51  |
| 250440_at       | At5g10360 | 40S Ribosomal Protein S6 (Rps6B)                                                         | 0.0074 | 0.0188 | 3.29  |
| 260426_at       | At1g72370 | 40S Ribosomal Protein Sa (Rpsaa)                                                         | 0.0120 | 0.0241 | 2.66  |
| 267349_at       | At2g40010 | 60S Acidic Ribosomal Protein P0 (Rpp0A)                                                  | 0.0049 | 0.0156 | 7.47  |
| 259006_at       | At3g09200 | 60S Acidic Ribosomal Protein P0 (Rpp0B)                                                  | 0.0106 | 0.0226 | 2.63  |
| 261578_at       | At1g01100 | 60S Acidic Ribosomal Protein P1 (Rpp1A)                                                  | 0.0201 | 0.0311 | 3.41  |
| 255657_at       | At4g00810 | 60S Acidic Ribosomal Protein P1 (Rpp1B)                                                  | 0.0103 | 0.0222 | 3.34  |
| 248768_at       | At5g47700 | 60S Acidic Ribosomal Protein P1 (Rpp1C)                                                  | 0.0058 | 0.0169 | 4.86  |
| 247900_at       | At5g57290 | 60S Acidic Ribosomal Protein P3 (Rpp3B)                                                  | 0.0000 | 0.0004 | 2.80  |
| 252347_at       | At3g48130 | 60S Ribosomal Protein L13 (Rpl13A), Pseudogene                                           | 0.0083 | 0.0200 | 3.33  |
| 245355_at       | At4g17390 | 60S Ribosomal Protein L15 (Rpl15B)                                                       | 0.0185 | 0.0298 | 2.85  |
| 262117_at       | At1g02780 | 60S Ribosomal Protein L19 (Rpl19A)                                                       | 0.0007 | 0.0068 | 4.60  |
| 264421_at       | At1g43170 | 60S Ribosomal Protein L3 (Rpl3A)                                                         | 0.0134 | 0.0255 | 2.67  |
| 258715_at       | At3g09630 | 60S Ribosomal Protein L4/L1 (Rpl4A)                                                      | 0.0088 | 0.0205 | 2.94  |
| 261911_at       | At1g80750 | 60S Ribosomal Protein L7 (Rpl7A)                                                         | 0.0364 | 0.0421 | 6.12  |
| 256648_at       | At3g13580 | 60S Ribosomal Protein L7 (Rpl7D)                                                         | 0.0276 | 0.0365 | 5.03  |
| 251185_at       | At3g62870 | 60S Ribosomal Protein L7A (Rpl7Ab)                                                       | 0.0012 | 0.0082 | 2.51  |
| 247644_s_at     | At5g60390 | Elongation Factor 1-Alpha / Ef-1-Alpha                                                   | 0.0398 | 0.0442 | 4.92  |
| 253758_at       | At4g29060 | Elongation Factor Ts Family Protein                                                      | 0.0001 | 0.0019 | 3.50  |
| 260786_s_at     | At1g06220 | Elongation Factor Tu Family Protein                                                      | 0.0003 | 0.0047 | 4.98  |
| 262645_at       | At1g62750 | Elongation Factor Tu Family Protein                                                      | 0.0000 | 0.0003 | 4.78  |
| 254873_at       | At4g11420 | Eukaryotic Translation Initiation Factor 3 Subunit 10 / Eif-3 Theta / Eif3A (Tif3A1)     | 0.0039 | 0.0144 | 7.34  |
| 251738_at       | At3g56150 | Eukaryotic Translation Initiation Factor 3 Subunit 8 / Eif3 P110 / Eif3C / P105 (Tif3C1) | 0.0006 | 0.0058 | 3.68  |
| 246865_s_at     | At5g25780 | Eukaryotic Translation Initiation Factor 3 Subunit 9, Putative / Eif-3 Eta               | 0.0067 | 0.0180 | 3.94  |
| 257023_at       | At3g19760 | Eukaryotic Translation Initiation Factor 4A, Putative / Eif-4A, Putative                 | 0.0153 | 0.0273 | 3.16  |
| 247839_at       | At5g57870 | Eukaryotic Translation Initiation Factor 4F, Putative / Eif-4F, Putative                 | 0.0301 | 0.0381 | 4.28  |
| 261827_at       | At1g11480 | Eukaryotic Translation Initiation Factor-Related                                         | 0.0006 | 0.0061 | 5.49  |
| 266127_s_at     | At2g45030 | Mitochondrial Elongation Factor, Putative                                                | 0.0052 | 0.0162 | 5.70  |
| 251120_at       | At3g63490 | Ribosomal Protein L1 Family Protein                                                      | 0.0010 | 0.0076 | 3.50  |
| 259505_at       | At1g15810 | Ribosomal Protein S15 Family Protein                                                     | 0.0033 | 0.0132 | 3.12  |
| 259392_at       | At1g06380 | Ribosomal Protein-Related                                                                | 0.0020 | 0.0103 | 2.60  |
| 262859_at       | At1g64790 | Translational Activator Family Protein                                                   | 0.0033 | 0.0133 | 2.81  |
| H. Protein fate |           |                                                                                          |        |        |       |
| 247810_at       | At5g58290 | 26S Proteasome Aaa-Atpase Subunit (Rpt3)                                                 | 0.0308 | 0.0386 | 4.16  |
| 246147_s_at     | At5g20000 | 26S Proteasome Aaa-Atpase Subunit, Putative                                              | 0.0021 | 0.0105 | 2.72  |
| 263716_at       | At2g20580 | 26S Proteasome Regulatory Subunit S2 (Rpn1)                                              | 0.0131 | 0.0252 | 5.64  |
| 262686_at       | At1g75990 | 26S Proteasome Regulatory Subunit S3, Putative (Rpn3)                                    | 0.0369 | 0.0424 | 3.15  |
| 261174_at       | At1g04810 | 26S Proteasome Regulatory Subunit, Putative                                              | 0.0411 | 0.0450 | 7.16  |
| 267543_at       | At2g32730 | 26S Proteasome Regulatory Subunit, Putative                                              | 0.0043 | 0.0148 | 3.24  |
| 260842_at       | At1g29150 | 26S Proteasome Regulatory Subunit, Putative (Rpn6)                                       | 0.0039 | 0.0143 | 3.21  |
| 251287_at       | At3g61820 | Aspartyl Protease Family Protein                                                         | 0.0410 | 0.0449 | 3.45  |
| 251025_at       | At5g02190 | Aspartyl Protease Family Protein                                                         | 0.0000 | 0.0009 | 7.32  |
| 264641_at       | At1g09130 | Atp-Dependent Clp Protease Proteolytic Subunit, Putative                                 | 0.0459 | 0.0479 | 4.10  |
| 263685_at       | At1g26830 | Cullin, Putative                                                                         | 0.0203 | 0.0312 | 3.03  |
| 266509_at       | At2g47940 | Degp2 Protease (Degp2)                                                                   | 0.0000 | 0.0000 | 3.41  |
| 260616_at       | At1g53280 | Dj-1 Family Protein                                                                      | 0.0041 | 0.0145 | 3.50  |
| 255746_at       | At1g32020 | F-Box Family Protein                                                                     | 0.0059 | 0.0170 | 3.45  |
| 263670_at       | At2g04840 | F-Box Family Protein                                                                     | 0.0073 | 0.0187 | 17.37 |
| 265997_at       | At2g24250 | F-Box Family Protein                                                                     | 0.0096 | 0.0214 | 10.09 |
| 258411_at       | At3g17280 | F-Box Family Protein                                                                     | 0.0089 | 0.0206 | 12.06 |
| 258378_at       | At3g17490 | F-Box Family Protein                                                                     | 0.0366 | 0.0422 | 6.88  |
| 252284_at       | At3g49020 | F-Box Family Protein                                                                     | 0.0462 | 0.0480 | 4.06  |
| 251547_at       | At3g58860 | F-Box Family Protein                                                                     | 0.0066 | 0.0179 | 2.99  |
| 250883_at       | At5g03970 | F-Box Family Protein                                                                     | 0.0307 | 0.0385 | 2.67  |
| 253369_at       | At4g33210 | F-Box Family Protein (Fbl15)                                                             | 0.0001 | 0.0027 | 3.15  |
| 253364_at       | At4g33160 | F-Box Family Protein (Fbx13)                                                             | 0.0433 | 0.0464 | 5.09  |
| 264955_at       | At1g76920 | F-Box Family Protein (Fbx3)                                                              | 0.0410 | 0.0449 | 2.50  |
| 264058_at       | At2g03560 | F-Box Family Protein (Fbx7)                                                              | 0.0258 | 0.0353 | 3.90  |
| 266179_at       | At2g02300 | F-Box Family Protein / Skp1 Interacting Partner 3-Related                                | 0.0054 | 0.0164 | 3.03  |
| 263721_at       | At2g13630 | F-Box Family Protein-Related                                                             | 0.0476 | 0.0487 | 3.15  |
| 258142_at       | At3g18120 | F-Box Family Protein-Related                                                             | 0.0281 | 0.0369 | 2.51  |
| 257195_at       | At3g23680 | F-Box Family Protein-Related                                                             | 0.0202 | 0.0311 | 3.40  |
| 262626_at       | At1g06430 | Ftsh Protease, Putative                                                                  | 0.0132 | 0.0253 | 3.85  |
| 261064_at       | At1g07510 | Ftsh Protease, Putative                                                                  | 0.0040 | 0.0145 | 2.73  |
| 262937_at       | At1g79560 | Ftsh Protease, Putative                                                                  | 0.0018 | 0.0100 | 4.08  |
| 266842_at       | At2g26140 | Ftsh Protease, Putative                                                                  | 0.0187 | 0.0299 | 6.43  |
| 254181_at       | At4g23940 | Ftsh Protease, Putative                                                                  | 0.0176 | 0.0291 | 4.49  |
| 250162_at       | At5g15250 | Ftsh Protease, Putative                                                                  | 0.0397 | 0.0442 | 4.75  |
| 248303_at       | At5g53170 | Ftsh Protease, Putative                                                                  | 0.0058 | 0.0169 | 3.13  |
| 255813_at       | At1g19930 | Kelch Repeat-Containing F-Box Family Protein                                             | 0.0053 | 0.0163 | 2.53  |
| 258518_at       | At3g06570 | Kelch Repeat-Containing F-Box Family Protein                                             | 0.0186 | 0.0299 | 2.57  |

|             |           |                                                        |        |        |       |
|-------------|-----------|--------------------------------------------------------|--------|--------|-------|
| 254548_at   | At4g19870 | Kelch Repeat-Containing F-Box Family Protein           | 0.0145 | 0.0264 | 8.54  |
| 252901_at   | At4g39550 | Kelch Repeat-Containing F-Box Family Protein           | 0.0324 | 0.0396 | 3.63  |
| 248818_at   | At5g47040 | Lon Protease Homolog 1, Mitochondrial (Lon)            | 0.0148 | 0.0267 | 4.52  |
| 264340_at   | At1g70280 | Nhl Repeat-Containing Protein                          | 0.0027 | 0.0119 | 2.55  |
| 266459_at   | At2g47970 | Npl4 Family Protein                                    | 0.0000 | 0.0008 | 4.05  |
| 250041_at   | At5g18410 | P53 Inducible protein                                  | 0.0090 | 0.0208 | 3.92  |
| 245989_s_at | At5g20620 | Polyubiquitin (Ubq4)                                   | 0.0030 | 0.0128 | 2.89  |
| 250377_at   | At5g11560 | Pqq Enzyme Repeat-Containing Protein                   | 0.0033 | 0.0132 | 3.05  |
| 264807_at   | At1g08700 | Presenilin Family Protein                              | 0.0046 | 0.0152 | 2.88  |
| 267015_at   | At2g39340 | Sac3/Ganp Family Protein                               | 0.0027 | 0.0119 | 2.70  |
| 262334_at   | At1g64010 | Serpin, Putative / Serine Protease Inhibitor, Putative | 0.0453 | 0.0476 | 2.90  |
| 261224_at   | At1g20160 | Subtilase Family Protein                               | 0.0015 | 0.0092 | 3.58  |
| 245088_at   | At2g39850 | Subtilase Family Protein                               | 0.0075 | 0.0190 | 5.96  |
| 258368_at   | At3g14240 | Subtilase Family Protein                               | 0.0345 | 0.0409 | 3.39  |
| 254466_at   | At4g20430 | Subtilase Family Protein                               | 0.0252 | 0.0349 | 4.60  |
| 254433_at   | At4g20850 | Subtilase Family Protein                               | 0.0103 | 0.0222 | 3.87  |
| 254377_at   | At4g21650 | Subtilase Family Protein                               | 0.0212 | 0.0318 | 4.56  |
| 248961_at   | At5g45650 | Subtilase Family Protein                               | 0.0293 | 0.0376 | 4.86  |
| 247760_at   | At5g59130 | Subtilase Family Protein                               | 0.0391 | 0.0438 | 2.80  |
| 263406_at   | At2g04160 | Subtilisin-Like Protease (Air3)                        | 0.0020 | 0.0103 | 5.61  |
| 263302_at   | At2g15190 | Ulp1 Protease Family                                   | 0.0101 | 0.0220 | 21.63 |
| 255661_at   | At4g00690 | Ulp1 Protease Family Protein                           | 0.0446 | 0.0472 | 3.17  |

#### H1. Ubiquitin like conjugating enzyme activity

|             |           |                                                           |        |        |       |
|-------------|-----------|-----------------------------------------------------------|--------|--------|-------|
| 267301_at   | At2g30110 | Ubiquitin Activating Enzyme 1 (Uba1)                      | 0.0028 | 0.0120 | 3.74  |
| 253542_at   | At4g31670 | Ubiquitin Carboxyl-Terminal Hydrolase Family Protein      | 0.0334 | 0.0401 | 3.94  |
| 266248_at   | At2g27650 | Ubiquitin Carboxyl-Terminal Hydrolase-Related             | 0.0108 | 0.0228 | 4.13  |
| 252392_s_at | At3g47890 | Ubiquitin Carboxyl-Terminal Hydrolase-Related             | 0.0212 | 0.0319 | 10.55 |
| 263197_at   | At1g53930 | Ubiquitin Family Protein                                  | 0.0036 | 0.0137 | 10.60 |
| 263422_s_at | At2g17200 | Ubiquitin Family Protein                                  | 0.0290 | 0.0374 | 2.60  |
| 249240_at   | At5g42220 | Ubiquitin Family Protein                                  | 0.0000 | 0.0014 | 6.03  |
| 266776_at   | At2g29070 | Ubiquitin Fusion Degradation Ufd1 Family Protein          | 0.0137 | 0.0257 | 7.06  |
| 260839_at   | At1g43690 | Ubiquitin Interaction Motif-Containing Protein            | 0.0445 | 0.0471 | 3.39  |
| 261153_at   | At1g04850 | Ubiquitin-Associated (Uba)/Ts-N Domain-Containing Protein | 0.0012 | 0.0083 | 3.62  |
| 267598_at   | At2g33010 | Ubiquitin-Associated (Uba)/Ts-N Domain-Containing Protein | 0.0452 | 0.0475 | 4.84  |
| 267456_at   | At2g33770 | Ubiquitin-Conjugating Enzyme Family Protein               | 0.0035 | 0.0135 | 3.10  |
| 264335_s_at | At1g70320 | Ubiquitin-Protein Ligase 2 (Upl2)                         | 0.0009 | 0.0072 | 3.37  |
| 250693_at   | At5g06600 | Ubiquitin-Specific Protease 12 (Ubp12)                    | 0.0225 | 0.0329 | 3.11  |
| 257085_at   | At3g20630 | Ubiquitin-Specific Protease 14, Putative (Ubp14)          | 0.0342 | 0.0407 | 3.58  |
| 247838_at   | At5g57990 | Ubiquitin-Specific Protease 23, Putative (Ubp23)          | 0.0008 | 0.0071 | 2.95  |
| 252275_at   | At3g49600 | Ubiquitin-Specific Protease 26 (Ubp26)                    | 0.0024 | 0.0111 | 2.55  |

#### I. Transcription/splicing/RNA processing/modification

|           |           |                                                                                      |        |        |       |
|-----------|-----------|--------------------------------------------------------------------------------------|--------|--------|-------|
| 254073_at | At4g25500 | Arginine/Serine-Rich Splicing Factor Rsp40 (Rsp40)                                   | 0.0017 | 0.0097 | 3.39  |
| 248369_at | At5g52040 | Arginine/Serine-Rich Splicing Factor Rsp41 (Rsp41)                                   | 0.0001 | 0.0019 | 3.85  |
| 262246_at | At1g48410 | Argonaute Protein (Ago1)                                                             | 0.0273 | 0.0363 | 3.28  |
| 245748_at | At1g51140 | Basic Helix-Loop-Helix (Bhlh) Family Protein                                         | 0.0067 | 0.0180 | 3.51  |
| 267628_at | At2g42280 | Basic Helix-Loop-Helix (Bhlh) Family Protein                                         | 0.0137 | 0.0257 | 10.59 |
| 257990_at | At3g19860 | Basic Helix-Loop-Helix (Bhlh) Family Protein                                         | 0.0101 | 0.0220 | 2.60  |
| 251299_at | At3g61950 | Basic Helix-Loop-Helix (Bhlh) Family Protein                                         | 0.0000 | 0.0003 | 6.39  |
| 250569_at | At5g08130 | Basic Helix-Loop-Helix (Bhlh) Family Protein                                         | 0.0042 | 0.0147 | 2.81  |
| 248247_at | At5g53210 | Basic Helix-Loop-Helix (Bhlh) Family Protein                                         | 0.0157 | 0.0276 | 4.34  |
| 260230_at | At1g74500 | BHLH Family Protein                                                                  | 0.0078 | 0.0193 | 12.16 |
| 247199_at | At5g65210 | Bzip Family Transcription Factor (Tga1)                                              | 0.0192 | 0.0303 | 5.66  |
| 252969_at | At4g38900 | Bzip Protein                                                                         | 0.0022 | 0.0107 | 4.42  |
| 245092_at | At2g40950 | Bzip Transcription Factor Family Protein                                             | 0.0120 | 0.0241 | 2.88  |
| 258759_at | At3g10800 | Bzip Transcription Factor Family Protein                                             | 0.0247 | 0.0345 | 3.05  |
| 251702_at | At3g56660 | Bzip Transcription Factor Family Protein                                             | 0.0057 | 0.0169 | 5.37  |
| 250671_at | At5g06950 | Bzip Transcription Factor Hbp-1B Homolog                                             | 0.0001 | 0.0023 | 3.25  |
| 263955_at | At2g36010 | E2F Transcription Factor-3 (E2F3)                                                    | 0.0030 | 0.0127 | 3.80  |
| 251042_at | At5g02310 | Eceriferum3 Protein, Putative                                                        | 0.0106 | 0.0226 | 2.54  |
| 261701_at | At1g32750 | Hac13 Protein (Hac13)                                                                | 0.0011 | 0.0081 | 3.37  |
| 254964_at | At4g11080 | High Mobility Group (Hmg1/2) Family Protein                                          | 0.0137 | 0.0257 | 25.63 |
| 260166_at | At1g79840 | Homeobox-Leucine Zipper Protein 10 (Hb-10) / Hd-Zip Transcription Factor 10          | 0.0169 | 0.0284 | 8.84  |
| 266327_at | At2g46680 | Homeobox-Leucine Zipper Protein 7 (Hb-7) / Hd-Zip Transcription Factor 7             | 0.0104 | 0.0223 | 3.68  |
| 253402_at | At4g32880 | Homeobox-Leucine Zipper Transcription Factor (Hb-8)                                  | 0.0144 | 0.0263 | 13.51 |
| 250244_at | At5g13680 | Iki3 Family Protein                                                                  | 0.0466 | 0.0482 | 3.48  |
| 266859_at | At2g26880 | Mads-Box Family Protein                                                              | 0.0367 | 0.0423 | 5.69  |
| 245819_at | At1g26310 | Mads-Box Protein, Putative                                                           | 0.0444 | 0.0471 | 3.56  |
| 264093_at | At1g79220 | Mitochondrial Transcription Termination Factor Family Protein / Mterf Family Protein | 0.0316 | 0.0390 | 4.42  |

|             |           |                                                                                      |        |        |       |
|-------------|-----------|--------------------------------------------------------------------------------------|--------|--------|-------|
| 250554_at   | At5g07900 | Mitochondrial Transcription Termination Factor Family Protein / Mterf Family Protein | 0.0456 | 0.0478 | 2.94  |
| 266899_at   | At2g34620 | Mitochondrial Transcription Termination Factor-Related / Mterf-Related               | 0.0137 | 0.0257 | 2.65  |
| 245565_at   | At4g14605 | Mitochondrial Transcription Termination Factor-Related / Mterf-Related               | 0.0483 | 0.0492 | 6.80  |
| 264709_at   | At1g09770 | Myb Family Transcription Factor                                                      | 0.0022 | 0.0107 | 3.55  |
| 259365_at   | At1g13300 | Myb Family Transcription Factor                                                      | 0.0012 | 0.0081 | 17.63 |
| 256198_at   | At1g58220 | Myb Family Transcription Factor                                                      | 0.0437 | 0.0466 | 2.66  |
| 258626_at   | At3g04450 | Myb Family Transcription Factor                                                      | 0.0293 | 0.0377 | 3.03  |
| 258961_at   | At3g10580 | Myb Family Transcription Factor                                                      | 0.0117 | 0.0238 | 6.99  |
| 246790_at   | At5g27610 | Myb Family Transcription Factor                                                      | 0.0059 | 0.0170 | 4.45  |
| 261491_at   | At1g14350 | Myb Family Transcription Factor (Myb124)                                             | 0.0043 | 0.0148 | 4.23  |
| 247549_at   | At5g61420 | Myb Family Transcription Factor (Myb28)                                              | 0.0461 | 0.0479 | 3.86  |
| 266719_at   | At2g46830 | Myb-Related Transcription Factor (Cca1)                                              | 0.0008 | 0.0070 | 2.77  |
| 264460_at   | At1g10170 | Nf-X1 Type Zinc Finger Family Protein                                                | 0.0009 | 0.0071 | 3.63  |
| 259117_at   | At3g01320 | Paired Amphipathic Helix Repeat-Containing Protein                                   | 0.0125 | 0.0246 | 2.60  |
| 264858_at   | At1g24190 | Paired Amphipathic Helix Repeat-Containing Protein                                   | 0.0002 | 0.0038 | 7.08  |
| 258892_at   | At3g05670 | Phd Finger Family Protein                                                            | 0.0034 | 0.0134 | 2.70  |
| 255472_at   | At4g02430 | Pre-Mrna Splicing Factor, Putative / Sr1 Protein, Putative                           | 0.0030 | 0.0127 | 3.96  |
| 265125_at   | At1g55410 | Pseudogene, Chp-Rich Zinc Finger Protein, Putative                                   | 0.0494 | 0.0497 | 6.82  |
| 264781_at   | At1g08540 | Rna Polymerase Sigma Subunit Sigb (Sigb) / Sigma Factor 2 (Sig2)                     | 0.0147 | 0.0266 | 5.68  |
| 250255_at   | At5g13730 | Rna Polymerase Sigma Subunit Sigd (Sigd) / Sigma-Like Factor (Sig4)                  | 0.0000 | 0.0017 | 3.63  |
| 246207_at   | At4g36960 | Rna Recognition Motif (Rrm)-Containing Protein                                       | 0.0186 | 0.0299 | 3.08  |
| 248869_at   | At5g46840 | Rna Recognition Motif (Rrm)-Containing Protein                                       | 0.0012 | 0.0084 | 3.11  |
| 250447_at   | At5g10800 | Rna Recognition Motif (Rrm)-Containing Protein                                       | 0.0346 | 0.0410 | 2.57  |
| 255598_at   | At4g00830 | Rna Recognition Motif (Rrm)-Containing Protein                                       | 0.0070 | 0.0184 | 2.78  |
| 258316_at   | At3g22660 | Rma Processing Protein-Related                                                       | 0.0082 | 0.0199 | 2.89  |
| 246447_at   | At5g16780 | Sart-1 Family Protein                                                                | 0.0080 | 0.0196 | 4.73  |
| 245247_at   | At4g17230 | Scarecrow-Like Transcription Factor 13 (Sc13)                                        | 0.0434 | 0.0464 | 2.92  |
| 252173_at   | At3g50650 | Scarecrow-Like Transcription Factor 7 (Sc17)                                         | 0.0011 | 0.0079 | 3.36  |
| 246140_at   | At5g19910 | Soh1 Family Protein                                                                  | 0.0268 | 0.0360 | 4.17  |
| 257267_at   | At3g15030 | Tcp Family Transcription Factor, Putative                                            | 0.0026 | 0.0118 | 15.34 |
| 262096_at   | At1g56010 | Transcription Activator Nac1 (Nac1)                                                  | 0.0092 | 0.0209 | 6.21  |
| 253065_at   | At4g37740 | Transcription factor GRL2                                                            | 0.0388 | 0.0436 | 4.63  |
| 261079_s_at | At1g07470 | Transcription Factor Iia Large Subunit, Putative / Tfiia Large Subunit, Putative     | 0.0099 | 0.0217 | 2.62  |
| 246255_at   | At4g36650 | Transcription Factor Iib (Tfiib) Family Protein                                      | 0.0082 | 0.0198 | 2.97  |
| 264792_at   | At1g08620 | Transcription Factor Jmonji (Jmj) Family Protein                                     | 0.0239 | 0.0339 | 2.96  |
| 256258_at   | At3g12480 | Transcription Factor, Putative                                                       | 0.0058 | 0.0169 | 2.51  |
| 257524_at   | At3g01330 | Transcription Factor, Putative / E2F-Like Repressor E2L2 (E2L2)                      | 0.0004 | 0.0049 | 3.77  |
| 256695_at   | At3g32090 | Transcription Factor-Related                                                         | 0.0145 | 0.0264 | 3.66  |
| 260374_at   | At1g73960 | Transcription initiation factor                                                      | 0.0045 | 0.0151 | 2.53  |
| 249133_at   | At5g43130 | Transcription Initiation Factor Iid (Tfiid) Component Taf4 Family Protein            | 0.0099 | 0.0218 | 3.55  |
| 261041_at   | At1g17440 | Transcription Initiation Factor Iid (Tfiid) Subunit A Family Protein                 | 0.0445 | 0.0471 | 7.15  |
| 266605_at   | At2g46020 | Transcription Regulatory Protein Snf2, Putative                                      | 0.0003 | 0.0040 | 3.42  |
| 245288_at   | At4g16420 | Transcriptional Adaptor (Ada2B)                                                      | 0.0429 | 0.0461 | 2.51  |
| 245237_at   | At4g25520 | Transcriptional Co-Regulator Family Protein                                          | 0.0008 | 0.0069 | 2.94  |
| 253540_at   | At4g31620 | Transcriptional Factor B3 Family Protein                                             | 0.0032 | 0.0131 | 9.27  |
| 253501_at   | At4g32010 | Transcriptional Factor B3 Family Protein                                             | 0.0045 | 0.0151 | 3.86  |
| 254992_at   | At4g10710 | Transcriptional Regulator-Related                                                    | 0.0029 | 0.0123 | 4.17  |
| 261429_at   | At1g18860 | Wrky Family Transcription Factor                                                     | 0.0187 | 0.0299 | 16.45 |
| 265718_at   | At2g03340 | Wrky Family Transcription Factor                                                     | 0.0498 | 0.0499 | 2.60  |
| 258975_at   | At3g01970 | Wrky Family Transcription Factor                                                     | 0.0386 | 0.0435 | 3.14  |
| 254347_at   | At4g22070 | Wrky Family Transcription Factor                                                     | 0.0004 | 0.0048 | 15.17 |
| 253983_at   | At4g26640 | Wrky Family Transcription Factor                                                     | 0.0007 | 0.0068 | 2.59  |
| 260266_at   | At1g68520 | Zinc Finger (B-Box Type) Family Protein                                              | 0.0019 | 0.0102 | 3.20  |
| 252236_at   | At3g49930 | Zinc Finger (C2H2 Type) Family Protein                                               | 0.0000 | 0.0015 | 10.50 |
| 255491_at   | At4g02670 | Zinc Finger (C2H2 Type) Family Protein                                               | 0.0408 | 0.0448 | 5.31  |
| 253526_at   | At4g31420 | Zinc Finger (C2H2 Type) Family Protein                                               | 0.0005 | 0.0057 | 2.57  |
| 245691_at   | At5g04240 | Zinc Finger (C2H2 Type) Family Protein                                               | 0.0134 | 0.0255 | 3.29  |
| 263908_at   | At2g36480 | Zinc Finger (C2H2-Type) Family Protein                                               | 0.0017 | 0.0095 | 6.85  |
| 252401_at   | At3g48030 | Zinc Finger (C3Hc4-Type Ring Finger) Family Protein                                  | 0.0053 | 0.0163 | 4.29  |
| 265086_at   | At1g03770 | Zinc Finger (C3Hc4-Type Ring Finger) Family Protein                                  | 0.0068 | 0.0181 | 4.43  |
| 260823_at   | At1g06770 | Zinc Finger (C3Hc4-Type Ring Finger) Family Protein                                  | 0.0081 | 0.0198 | 10.32 |
| 259662_at   | At1g55255 | Zinc Finger (C3Hc4-Type Ring Finger) Family Protein                                  | 0.0157 | 0.0275 | 3.62  |
| 245828_at   | At1g57820 | Zinc Finger (C3Hc4-Type Ring Finger) Family Protein                                  | 0.0071 | 0.0185 | 4.35  |
| 262302_at   | At1g70910 | Zinc Finger (C3Hc4-Type Ring Finger) Family Protein                                  | 0.0002 | 0.0037 | 5.60  |
| 264854_at   | At2g17450 | Zinc Finger (C3Hc4-Type Ring Finger) Family Protein                                  | 0.0008 | 0.0071 | 2.53  |
| 263462_at   | At2g31780 | Zinc Finger (C3Hc4-Type Ring Finger) Family Protein                                  | 0.0134 | 0.0255 | 12.68 |
| 245059_at   | At2g39720 | Zinc Finger (C3Hc4-Type Ring Finger) Family Protein                                  | 0.0037 | 0.0139 | 3.28  |
| 267539_at   | At2g42030 | Zinc Finger (C3Hc4-Type Ring Finger) Family Protein                                  | 0.0084 | 0.0201 | 3.41  |
| 258758_at   | At3g10810 | Zinc Finger (C3Hc4-Type Ring Finger) Family Protein                                  | 0.0469 | 0.0483 | 2.71  |
| 251708_at   | At3g56580 | Zinc Finger (C3Hc4-Type Ring Finger) Family Protein                                  | 0.0136 | 0.0256 | 3.24  |
| 251454_at   | At3g60080 | Zinc Finger (C3Hc4-Type Ring Finger) Family Protein                                  | 0.0152 | 0.0271 | 3.01  |
| 255075_at   | At4g09110 | Zinc Finger (C3Hc4-Type Ring Finger) Family Protein                                  | 0.0290 | 0.0374 | 10.83 |
| 245264_at   | At4g17245 | Zinc Finger (C3Hc4-Type Ring Finger) Family Protein                                  | 0.0155 | 0.0274 | 4.87  |

|             |           |                                                                     |        |        |       |
|-------------|-----------|---------------------------------------------------------------------|--------|--------|-------|
| 253267_at   | At4g34100 | Zinc Finger (C3Hc4-Type Ring Finger) Family Protein                 | 0.0256 | 0.0352 | 3.70  |
| 246968_at   | At5g24870 | Zinc Finger (C3Hc4-Type Ring Finger) Family Protein                 | 0.0104 | 0.0223 | 4.57  |
| 266695_at   | At2g19810 | Zinc Finger (Ccch-Type) Family Protein                              | 0.0177 | 0.0291 | 3.38  |
| 266656_at   | At2g25900 | Zinc Finger (Ccch-Type) Family Protein                              | 0.0004 | 0.0051 | 3.78  |
| 265274_at   | At2g28450 | Zinc Finger (Ccch-Type) Family Protein                              | 0.0312 | 0.0388 | 3.21  |
| 250321_at   | At5g12850 | Zinc Finger (Ccch-Type) Family Protein                              | 0.0066 | 0.0179 | 2.77  |
| 261082_at   | At1g07360 | Zinc Finger (Ccch-Type) Family Protein                              | 0.0013 | 0.0087 | 3.14  |
| 250736_s_at | At5g06420 | Zinc Finger (Ccch-Type/C3Hc4-Type Ring Finger) Family Protein       | 0.0357 | 0.0416 | 4.31  |
| 254142_at   | At4g24630 | Zinc Finger (Dhch Type) Family Protein                              | 0.0050 | 0.0158 | 17.09 |
| 261231_at   | At1g20110 | Zinc Finger (Fyve Type) Family Protein                              | 0.0138 | 0.0257 | 3.22  |
| 266125_at   | At2g45050 | Zinc Finger (Gata Type) Family Protein                              | 0.0033 | 0.0132 | 2.80  |
| 252129_at   | At3g50890 | Zinc Finger Homeobox Family Protein / Zf-Hd Homeobox Family Protein | 0.0490 | 0.0495 | 3.27  |
| 246523_at   | At5g15850 | Zinc Finger Protein Constans-Like 1 (Col1)                          | 0.0169 | 0.0284 | 4.93  |
| 258497_at   | At3g02380 | Zinc Finger Protein Constans-Like 2 (Col2)                          | 0.0021 | 0.0105 | 3.73  |
| 260484_at   | At1g68360 | Zinc Finger Protein-Related                                         | 0.0006 | 0.0063 | 6.87  |
| 257062_at   | At3g18290 | Zinc Finger Protein-Related                                         | 0.0073 | 0.0187 | 3.11  |
| 264633_at   | At1g65660 | Zinc Knuckle (Cchc-Type) Family Protein                             | 0.0002 | 0.0035 | 4.98  |

#### 11. Helicase activity

|             |           |                                                                     |        |        |       |
|-------------|-----------|---------------------------------------------------------------------|--------|--------|-------|
| 257310_at   | At3g26560 | Atp-Dependent Rna Helicase, Putative                                | 0.0000 | 0.0004 | 6.23  |
| 247465_at   | At5g62190 | Dead Box Rna Helicase (Phr75)                                       | 0.0045 | 0.0151 | 3.10  |
| 262851_at   | At1g20920 | Dead Box Rna Helicase, Putative                                     | 0.0074 | 0.0188 | 2.75  |
| 266932_s_at | At2g07750 | Dead Box Rna Helicase, Putative                                     | 0.0133 | 0.0254 | 3.83  |
| 267454_at   | At2g33730 | Dead Box Rna Helicase, Putative                                     | 0.0016 | 0.0095 | 4.28  |
| 247564_at   | At5g61140 | Dead Box Rna Helicase, Putative                                     | 0.0158 | 0.0277 | 2.84  |
| 251534_at   | At3g58510 | Dead Box Rna Helicase, Putative (Rh11)                              | 0.0007 | 0.0064 | 2.52  |
| 261584_at   | At1g01040 | Dead/Deah Box Helicase Carpel Factory / Caf                         | 0.0456 | 0.0478 | 3.60  |
| 258554_at   | At3g06980 | Dead/Deah Box Helicase, Putative                                    | 0.0004 | 0.0053 | 2.62  |
| 252443_at   | At3g46960 | Dead/Deah Box Helicase, Putative                                    | 0.0013 | 0.0084 | 2.58  |
| 251362_at   | At3g61240 | Dead/Deah Box Helicase, Putative (Rh12)                             | 0.0033 | 0.0133 | 2.80  |
| 266501_at   | At2g06990 | Dead-Box Rna Helicase, Putative                                     | 0.0334 | 0.0401 | 3.80  |
| 262636_at   | At1g06670 | Helicase                                                            | 0.0015 | 0.0092 | 13.37 |
| 256140_at   | At1g48650 | Helicase Domain-Containing Protein                                  | 0.0263 | 0.0356 | 4.30  |
| 263936_at   | At2g35920 | Helicase Domain-Containing Protein                                  | 0.0316 | 0.0391 | 2.69  |
| 255600_s_at | At5g10370 | Helicase Domain-Containing Protein / Ibr Domain-Containing Protein  | 0.0048 | 0.0155 | 35.87 |
| 256082_at   | At1g20720 | Helicase-Related                                                    | 0.0370 | 0.0424 | 3.70  |
| 260695_at   | At1g32490 | RNA Helicase, Putative                                              | 0.0005 | 0.0055 | 3.99  |
| 254675_at   | At4g18465 | RNA Helicase, Putative                                              | 0.0000 | 0.0001 | 3.92  |
| 250273_at   | At5g13010 | RNA Helicase, Putative                                              | 0.0011 | 0.0078 | 3.07  |
| 251876_at   | At3g54280 | Snf2 Domain-Containing Protein / Helicase Domain-Containing Protein | 0.0143 | 0.0262 | 2.73  |
| 262800_at   | At1g20960 | U5 Small Nuclear Ribonucleoprotein Helicase, Putative               | 0.0015 | 0.0091 | 7.21  |

#### 12. RNA metabolism

|             |           |                                                                               |        |        |       |
|-------------|-----------|-------------------------------------------------------------------------------|--------|--------|-------|
| 262468_at   | At1g50200 | Aminoacyl-Trna Synthetase Family Protein                                      | 0.0013 | 0.0087 | 3.53  |
| 253935_at   | At4g26870 | Aspartyl-Trna Synthetase, Putative / Aspartate--Trna Ligase, Putative         | 0.0025 | 0.0116 | 3.38  |
| 261887_at   | At1g80780 | Ccr4-Not Transcription Complex Protein, Putative                              | 0.0192 | 0.0303 | 2.86  |
| 245631_at   | At1g25350 | Glutamine-Trna Ligase, Putative                                               | 0.0032 | 0.0131 | 4.43  |
| 256000_at   | At1g29880 | Glycyl-Trna Synthetase / Glycine--Trna Ligase                                 | 0.0010 | 0.0077 | 3.75  |
| 258601_at   | At3g02760 | Histidyl-Trna Synthetase, Putative / Histidine--Trna Ligase, Putative         | 0.0031 | 0.0128 | 3.01  |
| 260021_at   | At1g30010 | Intron Maturase, Type Ii Family Protein                                       | 0.0172 | 0.0286 | 5.46  |
| 260256_at   | At1g74350 | Intron Maturase, Type Ii Family Protein                                       | 0.0282 | 0.0370 | 5.24  |
| 252941_at   | At4g39280 | Phenylalanyl-Trna Synthetase, Putative / Phenylalanine--Trna Ligase, Putative | 0.0001 | 0.0030 | 2.68  |
| 261614_at   | At1g49760 | Polyadenylate-Binding Protein, Putative / Pabp, Putative                      | 0.0151 | 0.0270 | 3.57  |
| 245085_at   | At2g23350 | Polyadenylate-Binding Protein, Putative / Pabp, Putative                      | 0.0367 | 0.0423 | 3.63  |
| 259377_at   | At3g16380 | Polyadenylate-Binding Protein, Putative / Pabp, Putative                      | 0.0002 | 0.0033 | 6.59  |
| 249821_at   | At5g23690 | Polynucleotide Adenylyltransferase Family Protein                             | 0.0211 | 0.0318 | 8.81  |
| 259344_at   | At3g03710 | Polyribonucleotide Nucleotidyltransferase, Putative                           | 0.0460 | 0.0479 | 5.94  |
| 258034_at   | At3g21300 | Rna Methyltransferase Family Protein                                          | 0.0063 | 0.0175 | 9.50  |
| 246780_at   | At5g27470 | Seryl-Trna Synthetase / Serine--Trna Ligase                                   | 0.0000 | 0.0011 | 3.64  |
| 264350_at   | At1g11870 | Seryl-Trna Synthetase, Putative / Serine--Trna Ligase, Putative               | 0.0000 | 0.0004 | 3.58  |
| 254475_at   | At4g20440 | Small Nuclear Ribonucleoprotein Associated Protein B, Putative                | 0.0247 | 0.0345 | 22.79 |
| 266005_at   | At2g37340 | Splicing Factor Rsz33 (Rsz33)                                                 | 0.0050 | 0.0158 | 2.69  |
| 247271_at   | At5g64270 | Splicing Factor, Putative                                                     | 0.0087 | 0.0204 | 4.44  |
| 251837_s_at | At3g55200 | Splicing Factor, Putative                                                     | 0.0044 | 0.0150 | 4.10  |
| 248452_at   | At5g51300 | Splicing Factor-Related                                                       | 0.0000 | 0.0018 | 3.66  |
| 248106_at   | At5g55100 | Swap (Suppressor-Of-White-Apricot)/Surp Domain-Containing Protein             | 0.0026 | 0.0117 | 14.36 |
| 253565_at   | At4g31200 | Swap (Suppressor-Of-White-Apricot)/Surp Domain-Containing Protein             | 0.0107 | 0.0226 | 2.61  |
| 260779_at   | At1g14650 | Swap (Suppressor-Of-White-Apricot)/Surp Domain-Containing Protein             | 0.0474 | 0.0486 | 3.64  |
| 253295_at   | At4g33760 | tRNA Synthetase Class I (D, K And N) Family Protein                           | 0.0158 | 0.0276 | 2.90  |
| 251264_at   | At3g62120 | tRNA Synthetase Class I (G, H, P And S) Family Protein                        | 0.0001 | 0.0020 | 2.63  |
| 248339_at   | At5g52520 | tRNA Synthetase Class I (G, H, P And S) Family Protein                        | 0.0006 | 0.0060 | 4.08  |
| 264705_at   | At1g09620 | tRNA Synthetase Class I (I, L, M And V) Family Protein                        | 0.0185 | 0.0298 | 4.36  |
| 249630_s_at | At5g37150 | tRNA-Splicing Endonuclease Positive Effector-Related                          | 0.0001 | 0.0026 | 6.81  |

|             |           |                                                      |        |        |      |
|-------------|-----------|------------------------------------------------------|--------|--------|------|
| 267489_s_at | At2g19120 | tRNA-Splicing Endonuclease Positive Effector-Related | 0.0061 | 0.0173 | 5.66 |
| 246257_at   | At4g36690 | U2 Snmp Auxiliary Factor Large Subunit, Putative     | 0.0071 | 0.0185 | 4.05 |
| 264922_s_at | At1g60830 | U2 Snmp Auxiliary Factor Large Subunit, Putative     | 0.0012 | 0.0082 | 2.61 |
| 250528_at   | At5g08600 | U3 Ribonucleoprotein (Utp) Family Protein            | 0.0022 | 0.0107 | 4.20 |
| 255501_at   | At4g02400 | U3 Ribonucleoprotein (Utp) Family Protein            | 0.0060 | 0.0172 | 2.82 |
| 260780_at   | At1g14610 | Valyl-Trna Synthetase / Valine--Trna Ligase (Valrs)  | 0.0000 | 0.0017 | 4.20 |

#### J. Transporters

|           |           |                                                                                   |        |        |       |
|-----------|-----------|-----------------------------------------------------------------------------------|--------|--------|-------|
| 262005_at | At1g64550 | ABC Transporter Family Protein                                                    | 0.0078 | 0.0193 | 4.88  |
| 266038_at | At2g07680 | ABC Transporter Family Protein                                                    | 0.0112 | 0.0232 | 3.19  |
| 258916_at | At3g10670 | ABC Transporter Family Protein                                                    | 0.0039 | 0.0142 | 3.29  |
| 258033_at | At3g21250 | ABC Transporter Family Protein                                                    | 0.0352 | 0.0414 | 2.66  |
| 252379_at | At3g47730 | ABC Transporter Family Protein                                                    | 0.0044 | 0.0150 | 2.68  |
| 251845_at | At3g54540 | ABC Transporter Family Protein                                                    | 0.0027 | 0.0120 | 4.97  |
| 251781_at | At3g55320 | ABC Transporter Family Protein                                                    | 0.0209 | 0.0317 | 2.84  |
| 253863_at | At4g27420 | ABC Transporter Family Protein                                                    | 0.0178 | 0.0292 | 4.16  |
| 247222_at | At5g64840 | ABC Transporter Family Protein                                                    | 0.0004 | 0.0051 | 4.34  |
| 261353_at | At1g79600 | ABC1 Family Protein                                                               | 0.0046 | 0.0152 | 4.29  |
| 257253_at | At3g24190 | ABC1 Family Protein                                                               | 0.0106 | 0.0225 | 3.34  |
| 246973_at | At5g24970 | ABC1 Family Protein                                                               | 0.0212 | 0.0318 | 4.01  |
| 248554_at | At5g50330 | ABC1 Family Protein                                                               | 0.0002 | 0.0033 | 10.30 |
| 247232_at | At5g64940 | ABC1 Family Protein                                                               | 0.0076 | 0.0191 | 2.55  |
| 253006_at | At4g38250 | Amino Acid Transporter Family Protein                                             | 0.0013 | 0.0084 | 4.26  |
| 247120_at | At5g65990 | Amino Acid Transporter Family Protein                                             | 0.0239 | 0.0339 | 6.19  |
| 254723_at | At4g13510 | Ammonium Transporter 1, Member 1 (Amt1.1)                                         | 0.0347 | 0.0410 | 3.43  |
| 262883_at | At1g64780 | Ammonium Transporter 1, Member 2 (Amt1.2)                                         | 0.0317 | 0.0391 | 2.85  |
| 267142_at | At2g38290 | Ammonium Transporter 2 (Amt2)                                                     | 0.0041 | 0.0145 | 2.71  |
| 259514_at | At1g12480 | C4-Dicarboxylate Transporter/Malic Acid Transport Family Protein                  | 0.0011 | 0.0080 | 10.98 |
| 249765_at | At5g24030 | C4-Dicarboxylate Transporter/Malic Acid Transport Family Protein                  | 0.0030 | 0.0127 | 3.47  |
| 251053_at | At5g01490 | Cation Exchanger, Putative (Cax4)                                                 | 0.0394 | 0.0440 | 3.95  |
| 267275_at | At2g30240 | Cation/Hydrogen Exchanger, Putative (Chx13)                                       | 0.0032 | 0.0130 | 2.57  |
| 252087_at | At3g52080 | Cation/Hydrogen Exchanger, Putative (Chx28)                                       | 0.0239 | 0.0339 | 8.51  |
| 262757_at | At1g16380 | Cation/Proton Exchanger, Putative (Chx1)                                          | 0.0414 | 0.0452 | 3.69  |
| 256751_at | At3g27170 | Chloride Channel Protein (Clc-B)                                                  | 0.0024 | 0.0114 | 3.64  |
| 246510_at | At5g15410 | Cyclic Nucleotide-Regulated Ion Channel / Cyclic Nucleotide-Gated Channel (Cngc2) | 0.0394 | 0.0439 | 3.15  |
| 261142_at | At1g19780 | Cyclic Nucleotide-Regulated Ion Channel, Putative (Cngc8)                         | 0.0013 | 0.0086 | 8.63  |
| 256305_at | At1g30400 | Glutathione S-Conjugate Abc Transporter (Mrp1)                                    | 0.0002 | 0.0035 | 4.59  |
| 267319_at | At2g34660 | Glutathione S-Conjugate Abc Transporter (Mrp2)                                    | 0.0109 | 0.0229 | 3.74  |
| 266464_at | At2g47800 | Glutathione-Conjugate Transporter (Mrp4)                                          | 0.0211 | 0.0318 | 8.79  |
| 251227_at | At3g62700 | Glutathione-Conjugate Transporter, Putative                                       | 0.0196 | 0.0306 | 4.95  |
| 248338_at | At5g52440 | Hcf106 Protein                                                                    | 0.0003 | 0.0040 | 2.64  |
| 255686_at | At4g00630 | K+ Efflux Antiporter, Putative (Kea2)                                             | 0.0068 | 0.0181 | 3.49  |
| 265424_at | At2g20780 | Mannitol Transporter, Putative                                                    | 0.0007 | 0.0068 | 2.76  |
| 258693_at | At3g08650 | Metal Transporter Family Protein                                                  | 0.0068 | 0.0181 | 3.54  |
| 250206_at | At5g14040 | Mitochondrial Phosphate Transporter                                               | 0.0053 | 0.0163 | 2.50  |
| 266752_at | At2g47000 | Multidrug Resistant (Mdr) Abc Transporter, Putative                               | 0.0154 | 0.0273 | 3.35  |
| 264456_at | At1g10390 | Nucleoporin Family Protein                                                        | 0.0273 | 0.0363 | 2.99  |
| 245116_at | At2g41620 | Nucleoporin Interacting Component Family Protein                                  | 0.0001 | 0.0030 | 2.91  |
| 246112_at | At5g20200 | Nucleoporin-Related                                                               | 0.0044 | 0.0149 | 2.72  |
| 261074_at | At1g07290 | Nucleotide-Sugar Transporter Family Protein                                       | 0.0103 | 0.0222 | 9.90  |
| 257789_at | At3g27020 | Oligopeptide Transporter Opt Family Protein                                       | 0.0486 | 0.0494 | 3.96  |
| 254938_at | At4g10770 | Oligopeptide Transporter Opt Family Protein                                       | 0.0316 | 0.0391 | 2.97  |
| 245296_at | At4g16370 | Oligopeptide Transporter Opt Family Protein                                       | 0.0042 | 0.0146 | 3.53  |
| 247286_at | At5g64280 | Oxoglutarate/Malate Translocator, Putative                                        | 0.0148 | 0.0267 | 4.47  |
| 247289_at | At5g64290 | Oxoglutarate/Malate Translocator, Putative                                        | 0.0214 | 0.0319 | 4.90  |
| 250278_at | At5g12860 | Oxoglutarate/Malate Translocator, Putative                                        | 0.0000 | 0.0011 | 5.12  |
| 253427_at | At4g32390 | Phosphate Translocator-Related                                                    | 0.0458 | 0.0479 | 2.67  |
| 257311_at | At3g26570 | Phosphate Transporter Family Protein                                              | 0.0036 | 0.0138 | 3.78  |
| 267423_at | At2g35060 | Potassium Transporter Family Protein                                              | 0.0206 | 0.0315 | 3.09  |
| 264338_at | At1g70300 | Potassium Transporter, Putative                                                   | 0.0008 | 0.0069 | 3.34  |
| 258829_at | At3g07100 | Protein Transport Protein Sec24, Putative                                         | 0.0329 | 0.0399 | 4.39  |
| 248344_at | At5g52280 | Protein Transport Protein-Related                                                 | 0.0001 | 0.0027 | 3.25  |
| 261425_at | At1g18880 | Proton-Dependent Oligopeptide Transport (Pot) Family Protein                      | 0.0108 | 0.0228 | 2.99  |
| 260693_at | At1g32450 | Proton-Dependent Oligopeptide Transport (Pot) Family Protein                      | 0.0001 | 0.0031 | 4.86  |
| 262281_at | At1g68570 | Proton-Dependent Oligopeptide Transport (Pot) Family Protein                      | 0.0025 | 0.0115 | 7.16  |
| 252594_at | At3g45680 | Proton-Dependent Oligopeptide Transport (Pot) Family Protein                      | 0.0347 | 0.0411 | 2.77  |
| 252525_at | At3g46450 | Sec14 Cytosolic Factor Family Protein / Phosphoglyceride Transfer Family Protein  | 0.0001 | 0.0031 | 3.09  |
| 259803_at | At1g72150 | Sec14 Cytosolic Factor Family Protein / Phosphoglyceride Transfer Family Protein  | 0.0048 | 0.0155 | 3.43  |
| 259804_at | At1g72160 | Sec14 Cytosolic Factor Family Protein / Phosphoglyceride Transfer Family Protein  | 0.0442 | 0.0469 | 3.70  |
| 252884_at | At4g39170 | Sec14 Cytosolic Factor, Putative / Phosphoglyceride Transfer Protein, Putative    | 0.0025 | 0.0116 | 2.71  |
| 252662_at | At3g44340 | Sec23/Sec24 Transport Family Protein                                              | 0.0325 | 0.0397 | 2.68  |
| 248084_at | At5g55470 | Sodium Proton Exchanger / Na+/H+ Exchanger 4 (Nhx4)                               | 0.0000 | 0.0004 | 7.42  |
| 248756_at | At5g47560 | Sodium/Dicarboxylate Cotransporter, Putative                                      | 0.0069 | 0.0182 | 3.27  |

|             |           |                                                                          |        |        |       |
|-------------|-----------|--------------------------------------------------------------------------|--------|--------|-------|
| 264204_at   | At1g22710 | Sucrose Transporter / Sucrose-Proton Symporter (Suc2)                    | 0.0286 | 0.0372 | 4.06  |
| 260170_at   | At1g71890 | Sucrose Transporter / Sucrose-Proton Symporter (Suc5)                    | 0.0296 | 0.0379 | 3.33  |
| 245499_at   | At4g16480 | Sugar Transporter Family Protein                                         | 0.0015 | 0.0091 | 2.56  |
| 246310_at   | At3g51895 | Sulfate Transporter (St1)                                                | 0.0003 | 0.0045 | 2.74  |
| 251504_at   | At3g59030 | Transparent Testa 12 Protein (Tt12) / Multidrug Transporter-Like Protein | 0.0426 | 0.0459 | 4.55  |
| 251187_at   | At3g62770 | Transport Protein-Related                                                | 0.0063 | 0.0175 | 2.62  |
| 263104_at   | At2g05120 | Transporter                                                              | 0.0033 | 0.0132 | 17.23 |
| 262797_at   | At1g20840 | Transporter-Related                                                      | 0.0003 | 0.0042 | 5.16  |
| 253188_at   | At4g35300 | Transporter-Related                                                      | 0.0037 | 0.0140 | 3.87  |
| 246122_at   | At5g20380 | Transporter-Related                                                      | 0.0430 | 0.0462 | 3.24  |
| 264419_s_at | At1g43310 | Triose Phosphate/Phosphate Translocator-Related                          | 0.0477 | 0.0487 | 4.32  |
| 266336_at   | At2g32270 | Zinc Transporter (Zip3)                                                  | 0.0423 | 0.0456 | 3.85  |
| 251545_at   | At3g58810 | Zinc Transporter, Putative                                               | 0.0070 | 0.0184 | 6.70  |

#### K. Transposable elements, viral and plasmid proteins

|             |           |                                             |        |        |       |
|-------------|-----------|---------------------------------------------|--------|--------|-------|
| 265757_x_at | At2g13160 | Cacta-Like Transposase Family (Ptta/En/Spm) | 0.0031 | 0.0128 | 5.39  |
| 255322_at   | At4g04270 | Cacta-Like Transposase Family (Ptta/En/Spm) | 0.0288 | 0.0373 | 6.72  |
| 255034_at   | At4g09540 | Copia-Like Retrotransposon Family           | 0.0002 | 0.0033 | 6.43  |
| 249114_at   | At5g43800 | Copia-Like Retrotransposon Family           | 0.0293 | 0.0377 | 6.59  |
| 263186_at   | At1g36110 | Copia-Like Retrotransposon Family           | 0.0121 | 0.0242 | 3.18  |
| 260866_at   | At1g43886 | Copia-Like Retrotransposon Family           | 0.0103 | 0.0222 | 3.53  |
| 266432_s_at | At2g07080 | Copia-Like Retrotransposon Family           | 0.0001 | 0.0031 | 2.76  |
| 254985_x_at | At4g10580 | Gypsy-Like Retrotransposon Family           | 0.0098 | 0.0217 | 5.96  |
| 255320_at   | At4g04230 | Gypsy-Like Retrotransposon Family           | 0.0018 | 0.0098 | 24.41 |
| 260016_at   | At1g41795 | Gypsy-Like Retrotransposon Family (Athila)  | 0.0060 | 0.0172 | 8.31  |
| 252847_at   | At3g42170 | Hat-Like Transposase Family (Hobo/Ac/Tam3)  | 0.0098 | 0.0217 | 3.22  |
| 261977_at   | At1g37057 | Hat-Like Transposase Family (Hobo/Ac/Tam3)  | 0.0426 | 0.0459 | 4.34  |
| 265744_at   | At2g06660 | Mariner-Like Transposase Family             | 0.0077 | 0.0193 | 2.98  |
| 257344_s_at | At1g45070 | Mutator-Like Transposase Family             | 0.0500 | 0.0500 | 3.37  |
| 258550_at   | At3g06940 | Mutator-Like Transposase Family             | 0.0094 | 0.0211 | 2.94  |
| 258733_at   | At3g05850 | Mutator-Like Transposase Family             | 0.0001 | 0.0029 | 14.71 |
| 264411_at   | At1g43240 | Mutator-Like Transposase Family             | 0.0479 | 0.0489 | 3.30  |
| 265294_at   | At2g14030 | Mutator-Like Transposase Family             | 0.0472 | 0.0485 | 3.22  |
| 266382_at   | At2g14595 | Mutator-Like Transposase Family             | 0.0158 | 0.0276 | 3.84  |
| 259456_s_at | At1g43995 | Non-LTR Retroelement reverse transcriptase  | 0.0121 | 0.0242 | 6.74  |
| 265497_at   | At2g15720 | Non-Ltr Retrotransposon Family (Line)       | 0.0000 | 0.0011 | 6.94  |
| 246193_at   | At5g20880 | Retrotransposon Family                      | 0.0020 | 0.0104 | 2.55  |

#### L. Unknown proteins

|             |           |                   |        |        |       |
|-------------|-----------|-------------------|--------|--------|-------|
| 261049_at   | At1g01430 | Expressed Protein | 0.0070 | 0.0183 | 4.52  |
| 261558_at   | At1g01770 | Expressed Protein | 0.0058 | 0.0169 | 3.11  |
| 259415_at   | At1g02330 | Expressed Protein | 0.0063 | 0.0175 | 4.06  |
| 264824_at   | At1g03420 | Expressed Protein | 0.0002 | 0.0034 | 3.85  |
| 264326_at   | At1g04230 | Expressed Protein | 0.0008 | 0.0071 | 2.52  |
| 262617_at   | At1g06590 | Expressed Protein | 0.0070 | 0.0184 | 2.72  |
| 261742_at   | At1g08390 | Expressed Protein | 0.0044 | 0.0150 | 3.34  |
| 264265_at   | At1g09280 | Expressed Protein | 0.0043 | 0.0148 | 3.35  |
| 263709_at   | At1g09310 | Expressed Protein | 0.0013 | 0.0086 | 2.76  |
| 264559_at   | At1g09610 | Expressed Protein | 0.0062 | 0.0174 | 7.73  |
| 264658_at   | At1g09910 | Expressed Protein | 0.0419 | 0.0455 | 2.70  |
| 264667_s_at | At1g09980 | Expressed Protein | 0.0218 | 0.0323 | 2.63  |
| 264407_at   | At1g10180 | Expressed Protein | 0.0129 | 0.0251 | 2.64  |
| 264450_s_at | At1g10250 | Expressed Protein | 0.0042 | 0.0147 | 4.78  |
| 257450_at   | At1g10530 | Expressed Protein | 0.0008 | 0.0071 | 13.47 |
| 261833_at   | At1g10670 | Expressed Protein | 0.0026 | 0.0118 | 3.12  |
| 262788_at   | At1g10690 | Expressed Protein | 0.0001 | 0.0026 | 25.40 |
| 260470_at   | At1g11120 | Expressed Protein | 0.0352 | 0.0414 | 3.35  |
| 260992_at   | At1g12150 | Expressed Protein | 0.0129 | 0.0250 | 18.79 |
| 262663_at   | At1g13940 | Expressed Protein | 0.0035 | 0.0135 | 4.06  |
| 259488_at   | At1g15780 | Expressed Protein | 0.0079 | 0.0194 | 6.99  |
| 261844_at   | At1g15940 | Expressed Protein | 0.0308 | 0.0386 | 8.79  |
| 262710_at   | At1g16210 | Expressed Protein | 0.0013 | 0.0087 | 9.84  |
| 255774_at   | At1g18620 | Expressed Protein | 0.0161 | 0.0279 | 2.57  |
| 260665_at   | At1g19360 | Expressed Protein | 0.0021 | 0.0105 | 2.68  |
| 261131_at   | At1g19835 | Expressed Protein | 0.0013 | 0.0085 | 4.81  |
| 261221_at   | At1g19960 | Expressed Protein | 0.0228 | 0.0331 | 2.76  |
| 262854_at   | At1g20870 | Expressed Protein | 0.0119 | 0.0239 | 3.44  |
| 262493_at   | At1g21660 | Expressed Protein | 0.0129 | 0.0250 | 3.50  |
| 262505_at   | At1g21680 | Expressed Protein | 0.0207 | 0.0315 | 3.27  |
| 262494_at   | At1g21810 | Expressed Protein | 0.0407 | 0.0448 | 4.96  |
| 262490_at   | At1g21840 | Expressed Protein | 0.0121 | 0.0242 | 2.75  |
| 264207_at   | At1g22750 | Expressed Protein | 0.0136 | 0.0256 | 3.16  |
| 263037_at   | At1g23230 | Expressed Protein | 0.0214 | 0.0320 | 3.62  |
| 265180_at   | At1g23590 | Expressed Protein | 0.0351 | 0.0413 | 11.58 |



|             |           |                   |        |        |       |
|-------------|-----------|-------------------|--------|--------|-------|
| 265171_at   | At1g23790 | Expressed Protein | 0.0088 | 0.0205 | 9.01  |
| 245638_s_at | At1g24996 | Expressed Protein | 0.0193 | 0.0303 | 2.59  |
| 245822_at   | At1g26110 | Expressed Protein | 0.0339 | 0.0405 | 3.34  |
| 262322_at   | At1g27590 | Expressed Protein | 0.0284 | 0.0371 | 2.93  |
| 245659_at   | At1g28260 | Expressed Protein | 0.0339 | 0.0405 | 3.02  |
| 261445_at   | At1g28380 | Expressed Protein | 0.0320 | 0.0393 | 2.64  |
| 259767_s_at | At1g29350 | Expressed Protein | 0.0000 | 0.0004 | 3.11  |
| 257419_at   | At1g30800 | Expressed Protein | 0.0453 | 0.0476 | 3.52  |
| 261238_at   | At1g32810 | Expressed Protein | 0.0041 | 0.0146 | 3.48  |
| 262562_at   | At1g34220 | Expressed Protein | 0.0064 | 0.0177 | 4.53  |
| 262407_at   | At1g34630 | Expressed Protein | 0.0302 | 0.0382 | 2.93  |
| 262014_at   | At1g35660 | Expressed Protein | 0.0218 | 0.0323 | 9.96  |
| 261293_at   | At1g36980 | Expressed Protein | 0.0189 | 0.0300 | 3.07  |
| 256543_at   | At1g42480 | Expressed Protein | 0.0030 | 0.0127 | 2.71  |
| 265092_at   | At1g03910 | Expressed protein | 0.0011 | 0.0079 | 3.10  |
| 262430_s_at | At1g47550 | Expressed Protein | 0.0008 | 0.0071 | 2.54  |
| 259806_at   | At1g47900 | Expressed Protein | 0.0262 | 0.0356 | 2.85  |
| 261300_at   | At1g48560 | Expressed Protein | 0.0048 | 0.0155 | 12.97 |
| 261632_at   | At1g50120 | Expressed Protein | 0.0054 | 0.0164 | 2.91  |
| 261861_at   | At1g50450 | Expressed Protein | 0.0000 | 0.0016 | 2.67  |
| 260639_at   | At1g53180 | Expressed Protein | 0.0023 | 0.0109 | 4.02  |
| 260641_at   | At1g53200 | Expressed Protein | 0.0054 | 0.0164 | 6.47  |
| 259653_at   | At1g55240 | Expressed Protein | 0.0002 | 0.0036 | 9.72  |
| 245677_at   | At1g56660 | Expressed Protein | 0.0016 | 0.0093 | 4.04  |
| 264915_at   | At1g60790 | Expressed Protein | 0.0002 | 0.0036 | 5.62  |
| 265035_at   | At1g61620 | Expressed Protein | 0.0096 | 0.0215 | 2.80  |
| 261948_at   | At1g64680 | Expressed Protein | 0.0298 | 0.0379 | 2.60  |
| 245187_s_at | At1g67680 | Expressed Protein | 0.0157 | 0.0276 | 3.69  |
| 260031_at   | At1g68790 | Expressed Protein | 0.0088 | 0.0205 | 6.49  |
| 259370_at   | At1g69050 | Expressed Protein | 0.0467 | 0.0482 | 6.57  |
| 264701_at   | At1g70160 | Expressed Protein | 0.0307 | 0.0385 | 2.57  |
| 259756_at   | At1g71080 | Expressed Protein | 0.0001 | 0.0027 | 3.53  |
| 260377_at   | At1g73930 | Expressed Protein | 0.0283 | 0.0370 | 4.72  |
| 259903_at   | At1g74160 | Expressed Protein | 0.0080 | 0.0196 | 4.09  |
| 262967_at   | At1g75730 | Expressed Protein | 0.0239 | 0.0340 | 10.56 |
| 262678_at   | At1g75810 | Expressed Protein | 0.0233 | 0.0335 | 4.95  |
| 256329_at   | At1g76850 | Expressed Protein | 0.0017 | 0.0097 | 3.35  |
| 259762_at   | At1g77600 | Expressed Protein | 0.0188 | 0.0300 | 6.34  |
| 264126_at   | At1g79280 | Expressed Protein | 0.0274 | 0.0363 | 11.06 |
| 260162_at   | At1g79830 | Expressed Protein | 0.0001 | 0.0030 | 6.71  |
| 260302_at   | At1g80310 | Expressed Protein | 0.0000 | 0.0004 | 2.68  |
| 260275_at   | At1g80610 | Expressed Protein | 0.0017 | 0.0098 | 3.11  |
| 266795_at   | At2g03070 | Expressed Protein | 0.0259 | 0.0354 | 3.28  |
| 263857_at   | At2g04380 | Expressed Protein | 0.0004 | 0.0052 | 16.68 |
| 263100_at   | At2g05210 | Expressed Protein | 0.0058 | 0.0170 | 5.78  |
| 265519_at   | At2g06030 | Expressed Protein | 0.0031 | 0.0129 | 8.19  |
| 266427_at   | At2g07170 | Expressed Protein | 0.0122 | 0.0243 | 3.65  |
| 266046_at   | At2g07728 | Expressed Protein | 0.0236 | 0.0337 | 3.93  |
| 263567_at   | At2g15440 | Expressed Protein | 0.0001 | 0.0028 | 4.12  |
| 263097_at   | At2g16070 | Expressed Protein | 0.0196 | 0.0306 | 2.57  |
| 267278_at   | At2g19350 | Expressed Protein | 0.0237 | 0.0338 | 5.64  |
| 267282_at   | At2g19390 | Expressed Protein | 0.0256 | 0.0352 | 7.18  |
| 264024_at   | At2g21180 | Expressed Protein | 0.0039 | 0.0142 | 3.87  |
| 264023_at   | At2g21195 | Expressed Protein | 0.0031 | 0.0128 | 3.27  |
| 266001_at   | At2g24150 | Expressed Protein | 0.0022 | 0.0107 | 4.22  |
| 265281_at   | At2g28370 | Expressed Protein | 0.0300 | 0.0381 | 4.73  |
| 267193_at   | At2g30900 | Expressed Protein | 0.0076 | 0.0192 | 15.18 |
| 266473_at   | At2g31120 | Expressed Protein | 0.0095 | 0.0213 | 7.24  |
| 264115_at   | At2g31290 | Expressed Protein | 0.0247 | 0.0345 | 4.13  |
| 265679_at   | At2g32240 | Expressed Protein | 0.0209 | 0.0316 | 3.02  |
| 267642_at   | At2g32910 | Expressed Protein | 0.0101 | 0.0220 | 3.93  |
| 263915_at   | At2g36430 | Expressed Protein | 0.0147 | 0.0266 | 3.16  |
| 263910_at   | At2g36550 | Expressed Protein | 0.0010 | 0.0078 | 18.71 |
| 266007_at   | At2g37380 | Expressed Protein | 0.0002 | 0.0038 | 10.51 |
| 267180_at   | At2g37570 | Expressed Protein | 0.0332 | 0.0401 | 2.50  |
| 267359_at   | At2g40020 | Expressed Protein | 0.0024 | 0.0112 | 2.53  |
| 255874_at   | At2g40550 | Expressed Protein | 0.0423 | 0.0456 | 2.70  |
| 266047_at   | At2g40800 | Expressed Protein | 0.0186 | 0.0299 | 2.77  |
| 267583_at   | At2g41960 | Expressed Protein | 0.0157 | 0.0276 | 4.86  |
| 265883_at   | At2g42310 | Expressed Protein | 0.0387 | 0.0436 | 3.93  |
| 265854_at   | At2g42370 | Expressed Protein | 0.0011 | 0.0079 | 11.91 |
| 267341_at   | At2g44200 | Expressed Protein | 0.0048 | 0.0155 | 4.35  |
| 267343_at   | At2g44260 | Expressed Protein | 0.0205 | 0.0314 | 3.72  |
| 263781_at   | At2g46360 | Expressed Protein | 0.0326 | 0.0397 | 4.84  |

|             |           |                   |        |        |       |
|-------------|-----------|-------------------|--------|--------|-------|
| 266483_at   | At2g47910 | Expressed Protein | 0.0012 | 0.0084 | 3.19  |
| 259118_at   | At3g01310 | Expressed Protein | 0.0269 | 0.0361 | 3.17  |
| 259180_at   | At3g01680 | Expressed Protein | 0.0056 | 0.0168 | 3.52  |
| 259190_at   | At3g01780 | Expressed Protein | 0.0140 | 0.0260 | 3.00  |
| 259132_at   | At3g02250 | Expressed Protein | 0.0000 | 0.0002 | 2.57  |
| 258611_at   | At3g02860 | Expressed Protein | 0.0043 | 0.0148 | 4.43  |
| 258875_at   | At3g03160 | Expressed Protein | 0.0281 | 0.0369 | 3.41  |
| 258796_at   | At3g04630 | Expressed Protein | 0.0020 | 0.0103 | 3.06  |
| 258562_at   | At3g05980 | Expressed Protein | 0.0230 | 0.0332 | 6.23  |
| 257580_at   | At3g06210 | Expressed Protein | 0.0440 | 0.0468 | 3.34  |
| 258836_at   | At3g07210 | Expressed Protein | 0.0175 | 0.0290 | 6.24  |
| 259017_at   | At3g07310 | Expressed Protein | 0.0095 | 0.0213 | 3.93  |
| 259015_at   | At3g07350 | Expressed Protein | 0.0021 | 0.0105 | 4.41  |
| 259245_at   | At3g07660 | Expressed Protein | 0.0152 | 0.0271 | 11.50 |
| 258946_at   | At3g10650 | Expressed Protein | 0.0236 | 0.0337 | 4.05  |
| 257849_at   | At3g13060 | Expressed Protein | 0.0017 | 0.0097 | 2.88  |
| 257708_at   | At3g13330 | Expressed Protein | 0.0003 | 0.0041 | 3.11  |
| 258209_at   | At3g14060 | Expressed Protein | 0.0240 | 0.0340 | 4.27  |
| 257063_s_at | At3g18240 | Expressed Protein | 0.0073 | 0.0187 | 3.12  |
| 257727_at   | At3g18380 | Expressed Protein | 0.0468 | 0.0483 | 3.11  |
| 257719_at   | At3g18440 | Expressed Protein | 0.0355 | 0.0415 | 2.50  |
| 256656_at   | At3g18900 | Expressed Protein | 0.0043 | 0.0148 | 2.98  |
| 257991_at   | At3g19870 | Expressed Protein | 0.0044 | 0.0150 | 3.24  |
| 257663_at   | At3g20260 | Expressed Protein | 0.0311 | 0.0388 | 12.71 |
| 257086_at   | At3g20490 | Expressed Protein | 0.0016 | 0.0095 | 7.52  |
| 256808_at   | At3g21430 | Expressed Protein | 0.0297 | 0.0379 | 7.61  |
| 258444_at   | At3g22380 | Expressed Protein | 0.0037 | 0.0140 | 2.71  |
| 258447_at   | At3g22450 | Expressed Protein | 0.0017 | 0.0097 | 12.34 |
| 256932_at   | At3g22520 | Expressed Protein | 0.0042 | 0.0147 | 6.01  |
| 258078_at   | At3g25870 | Expressed Protein | 0.0417 | 0.0453 | 10.02 |
| 258255_at   | At3g26800 | Expressed Protein | 0.0184 | 0.0297 | 2.64  |
| 257147_at   | At3g27270 | Expressed Protein | 0.0179 | 0.0292 | 2.50  |
| 257145_at   | At3g27320 | Expressed Protein | 0.0006 | 0.0061 | 4.15  |
| 257970_at   | At3g27570 | Expressed Protein | 0.0061 | 0.0173 | 2.59  |
| 258238_at   | At3g27670 | Expressed Protein | 0.0498 | 0.0499 | 2.90  |
| 257845_at   | At3g28430 | Expressed Protein | 0.0001 | 0.0026 | 7.60  |
| 252682_at   | At3g44370 | Expressed Protein | 0.0307 | 0.0385 | 3.53  |
| 252462_at   | At3g47250 | Expressed Protein | 0.0032 | 0.0131 | 2.57  |
| 252424_at   | At3g47610 | Expressed Protein | 0.0042 | 0.0147 | 5.56  |
| 252405_at   | At3g48120 | Expressed Protein | 0.0084 | 0.0200 | 3.71  |
| 252353_at   | At3g48200 | Expressed Protein | 0.0038 | 0.0141 | 3.67  |
| 252319_at   | At3g48710 | Expressed Protein | 0.0078 | 0.0193 | 25.07 |
| 252276_at   | At3g49490 | Expressed Protein | 0.0002 | 0.0034 | 2.89  |
| 252057_at   | At3g52480 | Expressed Protein | 0.0334 | 0.0401 | 8.05  |
| 251990_at   | At3g53320 | Expressed Protein | 0.0046 | 0.0152 | 8.63  |
| 251698_at   | At3g56610 | Expressed Protein | 0.0031 | 0.0129 | 5.63  |
| 251556_at   | At3g58840 | Expressed Protein | 0.0145 | 0.0264 | 2.91  |
| 251380_at   | At3g60700 | Expressed Protein | 0.0327 | 0.0398 | 5.84  |
| 251117_at   | At3g63390 | Expressed Protein | 0.0014 | 0.0088 | 3.29  |
| 255615_at   | At4g01290 | Expressed Protein | 0.0012 | 0.0083 | 6.36  |
| 255495_at   | At4g02720 | Expressed Protein | 0.0008 | 0.0070 | 8.93  |
| 255456_at   | At4g02920 | Expressed Protein | 0.0001 | 0.0025 | 2.90  |
| 255409_at   | At4g03090 | Expressed Protein | 0.0212 | 0.0319 | 7.24  |
| 255245_at   | At4g05630 | Expressed Protein | 0.0420 | 0.0455 | 7.11  |
| 255023_at   | At4g09850 | Expressed Protein | 0.0123 | 0.0245 | 4.93  |
| 254944_at   | At4g10930 | Expressed Protein | 0.0050 | 0.0158 | 6.60  |
| 254965_at   | At4g11090 | Expressed Protein | 0.0040 | 0.0145 | 5.30  |
| 254732_at   | At4g13750 | Expressed Protein | 0.0242 | 0.0341 | 10.23 |
| 245588_at   | At4g15030 | Expressed Protein | 0.0337 | 0.0404 | 2.66  |
| 245433_at   | At4g17110 | Expressed Protein | 0.0007 | 0.0065 | 3.38  |
| 254621_at   | At4g18600 | Expressed Protein | 0.0138 | 0.0258 | 2.63  |
| 254493_at   | At4g20020 | Expressed Protein | 0.0001 | 0.0026 | 3.52  |
| 254369_at   | At4g21720 | Expressed Protein | 0.0284 | 0.0371 | 3.42  |
| 254152_at   | At4g24410 | Expressed Protein | 0.0129 | 0.0250 | 7.58  |
| 254017_at   | At4g26170 | Expressed Protein | 0.0132 | 0.0253 | 14.14 |
| 253977_at   | At4g26630 | Expressed Protein | 0.0333 | 0.0401 | 13.07 |
| 253923_at   | At4g27060 | Expressed Protein | 0.0088 | 0.0205 | 4.21  |
| 253868_at   | At4g27500 | Expressed Protein | 0.0003 | 0.0044 | 3.44  |
| 253849_at   | At4g28080 | Expressed Protein | 0.0003 | 0.0042 | 6.62  |
| 253803_at   | At4g28200 | Expressed Protein | 0.0087 | 0.0204 | 2.61  |
| 253817_at   | At4g28310 | Expressed Protein | 0.0016 | 0.0095 | 3.25  |
| 253739_at   | At4g28760 | Expressed Protein | 0.0047 | 0.0155 | 4.20  |
| 253752_at   | At4g28910 | Expressed Protein | 0.0365 | 0.0421 | 4.51  |
| 253577_at   | At4g31080 | Expressed Protein | 0.0110 | 0.0230 | 2.72  |

|             |           |                      |        |        |       |
|-------------|-----------|----------------------|--------|--------|-------|
| 253497_at   | At4g31880 | Expressed Protein    | 0.0000 | 0.0015 | 2.77  |
| 253424_at   | At4g32330 | Expressed Protein    | 0.0000 | 0.0008 | 4.49  |
| 253478_at   | At4g32350 | Expressed Protein    | 0.0041 | 0.0146 | 3.34  |
| 253446_at   | At4g32620 | Expressed Protein    | 0.0022 | 0.0107 | 3.07  |
| 253317_at   | At4g33960 | Expressed Protein    | 0.0226 | 0.0330 | 2.90  |
| 246221_at   | At4g37120 | Expressed Protein    | 0.0001 | 0.0026 | 3.74  |
| 252895_at   | At4g39450 | Expressed Protein    | 0.0014 | 0.0089 | 3.68  |
| 251123_at   | At5g01030 | Expressed Protein    | 0.0004 | 0.0050 | 2.59  |
| 251093_at   | At5g01360 | Expressed Protein    | 0.0062 | 0.0174 | 7.79  |
| 251015_at   | At5g02480 | Expressed Protein    | 0.0174 | 0.0288 | 3.39  |
| 250920_at   | At5g03390 | Expressed Protein    | 0.0027 | 0.0120 | 5.93  |
| 250907_at   | At5g03670 | Expressed Protein    | 0.0042 | 0.0147 | 10.20 |
| 245709_at   | At5g04320 | Expressed Protein    | 0.0001 | 0.0026 | 53.13 |
| 250888_at   | At5g04460 | Expressed Protein    | 0.0005 | 0.0057 | 6.87  |
| 250852_at   | At5g04670 | Expressed Protein    | 0.0289 | 0.0373 | 7.25  |
| 250823_at   | At5g05180 | Expressed Protein    | 0.0085 | 0.0202 | 5.96  |
| 250742_at   | At5g05800 | Expressed Protein    | 0.0277 | 0.0366 | 2.52  |
| 250602_s_at | At5g07940 | Expressed Protein    | 0.0048 | 0.0155 | 3.04  |
| 250573_at   | At5g08220 | Expressed Protein    | 0.0017 | 0.0098 | 6.24  |
| 250525_at   | At5g08550 | Expressed Protein    | 0.0415 | 0.0452 | 3.24  |
| 250461_at   | At5g10010 | Expressed Protein    | 0.0016 | 0.0093 | 2.75  |
| 250472_at   | At5g10210 | Expressed Protein    | 0.0159 | 0.0277 | 4.47  |
| 250360_at   | At5g11360 | Expressed Protein    | 0.0000 | 0.0005 | 3.53  |
| 245851_at   | At5g13540 | Expressed Protein    | 0.0027 | 0.0120 | 3.43  |
| 250232_at   | At5g13950 | Expressed Protein    | 0.0000 | 0.0008 | 2.84  |
| 246551_at   | At5g15070 | Expressed Protein    | 0.0172 | 0.0286 | 4.40  |
| 246513_at   | At5g15680 | Expressed Protein    | 0.0098 | 0.0217 | 3.05  |
| 246501_at   | At5g16280 | Expressed Protein    | 0.0310 | 0.0387 | 6.90  |
| 246416_at   | At5g16920 | Expressed Protein    | 0.0006 | 0.0061 | 9.18  |
| 249923_at   | At5g19120 | Expressed Protein    | 0.0009 | 0.0073 | 2.65  |
| 245972_at   | At5g20680 | Expressed Protein    | 0.0010 | 0.0077 | 2.61  |
| 249901_at   | At5g22650 | Expressed Protein    | 0.0029 | 0.0123 | 2.72  |
| 249753_at   | At5g24610 | Expressed Protein    | 0.0194 | 0.0304 | 2.99  |
| 249749_at   | At5g24630 | Expressed Protein    | 0.0024 | 0.0114 | 2.51  |
| 246660_at   | At5g35180 | Expressed Protein    | 0.0116 | 0.0236 | 3.45  |
| 249521_at   | At5g38690 | Expressed Protein    | 0.0180 | 0.0293 | 4.41  |
| 249528_at   | At5g38720 | Expressed Protein    | 0.0340 | 0.0406 | 4.16  |
| 249429_at   | At5g39880 | Expressed Protein    | 0.0307 | 0.0385 | 4.11  |
| 249378_at   | At5g40450 | Expressed Protein    | 0.0041 | 0.0146 | 6.30  |
| 249329_at   | At5g40960 | Expressed Protein    | 0.0000 | 0.0012 | 4.68  |
| 249339_at   | At5g41100 | Expressed Protein    | 0.0081 | 0.0198 | 2.77  |
| 249340_at   | At5g41140 | Expressed Protein    | 0.0004 | 0.0048 | 27.58 |
| 249315_at   | At5g41190 | Expressed Protein    | 0.0061 | 0.0173 | 3.75  |
| 249274_at   | At5g41860 | Expressed Protein    | 0.0071 | 0.0185 | 9.38  |
| 249237_at   | At5g42050 | Expressed Protein    | 0.0114 | 0.0234 | 4.25  |
| 249199_at   | At5g42520 | Expressed Protein    | 0.0045 | 0.0151 | 2.60  |
| 249181_at   | At5g42920 | Expressed Protein    | 0.0005 | 0.0058 | 3.50  |
| 248941_s_at | At5g45460 | Expressed Protein    | 0.0427 | 0.0460 | 7.03  |
| 248942_at   | At5g45480 | Expressed Protein    | 0.0067 | 0.0180 | 3.31  |
| 248761_at   | At5g47635 | Expressed Protein    | 0.0370 | 0.0424 | 3.74  |
| 248757_at   | At5g47680 | Expressed Protein    | 0.0081 | 0.0198 | 4.72  |
| 248668_at   | At5g48720 | Expressed Protein    | 0.0470 | 0.0484 | 2.96  |
| 248585_at   | At5g49640 | Expressed Protein    | 0.0090 | 0.0207 | 7.94  |
| 248505_at   | At5g50360 | Expressed Protein    | 0.0150 | 0.0270 | 3.19  |
| 248526_at   | At5g50730 | Expressed Protein    | 0.0090 | 0.0208 | 4.49  |
| 248291_at   | At5g53020 | Expressed Protein    | 0.0039 | 0.0143 | 2.86  |
| 248266_at   | At5g53440 | Expressed Protein    | 0.0261 | 0.0355 | 5.25  |
| 248228_at   | At5g53800 | Expressed Protein    | 0.0225 | 0.0329 | 3.77  |
| 248032_at   | At5g55860 | Expressed Protein    | 0.0019 | 0.0101 | 3.50  |
| 247879_at   | At5g57770 | Expressed Protein    | 0.0327 | 0.0398 | 4.98  |
| 247846_at   | At5g58100 | Expressed Protein    | 0.0376 | 0.0429 | 7.07  |
| 247828_at   | At5g58510 | Expressed Protein    | 0.0034 | 0.0134 | 2.92  |
| 247741_at   | At5g58960 | Expressed Protein    | 0.0000 | 0.0017 | 4.68  |
| 247369_at   | At5g63340 | Expressed Protein    | 0.0000 | 0.0012 | 5.56  |
| 247077_at   | At5g66420 | Expressed Protein    | 0.0118 | 0.0238 | 3.26  |
| 247046_at   | At5g66540 | Expressed Protein    | 0.0398 | 0.0442 | 3.44  |
| 258844_at   | At3g04740 | Expressed Protein    | 0.0000 | 0.0006 | 3.45  |
| 266435_s_at | At2g07130 | Hypothetical Protein | 0.0006 | 0.0058 | 5.63  |
| 261432_at   | At1g07680 | Hypothetical Protein | 0.0003 | 0.0042 | 18.96 |
| 260118_s_at | At1g33940 | Hypothetical Protein | 0.0352 | 0.0414 | 7.93  |
| 262560_at   | At1g34280 | Hypothetical Protein | 0.0075 | 0.0190 | 2.73  |
| 262013_s_at | At1g35640 | Hypothetical Protein | 0.0331 | 0.0400 | 7.10  |
| 256166_at   | At1g36920 | Hypothetical Protein | 0.0077 | 0.0193 | 5.19  |
| 257514_at   | At1g43940 | Hypothetical Protein | 0.0030 | 0.0126 | 5.38  |

|             |           |                      |        |        |       |
|-------------|-----------|----------------------|--------|--------|-------|
| 261856_at   | At1g50530 | Hypothetical Protein | 0.0099 | 0.0218 | 7.18  |
| 262995_s_at | At1g54430 | Hypothetical Protein | 0.0353 | 0.0414 | 5.35  |
| 259917_at   | At1g72580 | Hypothetical Protein | 0.0078 | 0.0193 | 6.38  |
| 261115_at   | At1g75360 | Hypothetical Protein | 0.0048 | 0.0156 | 4.47  |
| 264129_at   | At1g79170 | Hypothetical Protein | 0.0038 | 0.0141 | 3.92  |
| 265566_at   | At2g05600 | Hypothetical Protein | 0.0443 | 0.0470 | 2.58  |
| 265554_at   | At2g07505 | Hypothetical Protein | 0.0283 | 0.0370 | 9.72  |
| 263500_s_at | At2g07672 | Hypothetical Protein | 0.0361 | 0.0419 | 8.43  |
| 265239_s_at | At2g07692 | Hypothetical Protein | 0.0423 | 0.0456 | 4.51  |
| 265601_at   | At2g14390 | Hypothetical Protein | 0.0451 | 0.0475 | 3.82  |
| 263561_at   | At2g15360 | Hypothetical Protein | 0.0016 | 0.0094 | 3.17  |
| 265508_at   | At2g15930 | Hypothetical Protein | 0.0031 | 0.0128 | 10.60 |
| 265808_at   | At2g17960 | Hypothetical Protein | 0.0017 | 0.0095 | 4.07  |
| 266837_x_at | At2g25990 | Hypothetical Protein | 0.0017 | 0.0097 | 5.89  |
| 267022_at   | At2g34230 | Hypothetical Protein | 0.0002 | 0.0039 | 6.55  |
| 256951_at   | At3g19085 | Hypothetical Protein | 0.0040 | 0.0145 | 8.67  |
| 256565_at   | At3g19516 | Hypothetical Protein | 0.0279 | 0.0368 | 10.20 |
| 257577_at   | At3g30150 | Hypothetical Protein | 0.0049 | 0.0157 | 3.27  |
| 256606_at   | At3g32960 | Hypothetical Protein | 0.0020 | 0.0104 | 4.74  |
| 252807_at   | At3g42400 | Hypothetical Protein | 0.0267 | 0.0359 | 6.03  |
| 252752_s_at | At3g43480 | Hypothetical Protein | 0.0024 | 0.0113 | 8.80  |
| 252719_at   | At3g43950 | Hypothetical Protein | 0.0188 | 0.0300 | 4.67  |
| 257448_s_at | At3g45800 | Hypothetical Protein | 0.0039 | 0.0144 | 6.01  |
| 252249_at   | At3g49770 | Hypothetical Protein | 0.0311 | 0.0388 | 5.37  |
| 251419_at   | At3g60470 | Hypothetical Protein | 0.0023 | 0.0111 | 5.70  |
| 255470_at   | At4g03040 | Hypothetical Protein | 0.0083 | 0.0200 | 4.12  |
| 255192_at   | At4g07380 | Hypothetical Protein | 0.0184 | 0.0297 | 3.89  |
| 255106_at   | At4g08710 | Hypothetical Protein | 0.0020 | 0.0104 | 4.75  |
| 254514_at   | At4g20250 | Hypothetical Protein | 0.0008 | 0.0069 | 6.92  |
| 254220_at   | At4g23780 | Hypothetical Protein | 0.0000 | 0.0016 | 9.84  |
| 246248_at   | At4g36560 | Hypothetical Protein | 0.0433 | 0.0464 | 5.27  |
| 251079_at   | At5g02000 | Hypothetical Protein | 0.0241 | 0.0340 | 4.09  |
| 245978_at   | At5g13130 | Hypothetical Protein | 0.0012 | 0.0082 | 9.77  |
| 246543_at   | At5g15060 | Hypothetical Protein | 0.0430 | 0.0462 | 5.85  |
| 249819_at   | At5g23640 | Hypothetical Protein | 0.0227 | 0.0331 | 6.65  |
| 249660_at   | At5g36720 | Hypothetical Protein | 0.0092 | 0.0209 | 7.59  |
| 248650_at   | At5g49250 | Hypothetical Protein | 0.0072 | 0.0187 | 3.55  |
| 248561_at   | At5g49670 | Hypothetical Protein | 0.0057 | 0.0168 | 12.05 |
| 247961_at   | At5g56570 | Hypothetical Protein | 0.0090 | 0.0207 | 5.10  |
| 247021_at   | At5g67040 | Hypothetical Protein | 0.0156 | 0.0274 | 3.15  |
| 265457_at   | At2g46550 | Unknown protein      | 0.0253 | 0.0350 | 2.89  |
| 259275_at   | At3g01060 | Unknown protein      | 0.0097 | 0.0215 | 2.76  |
| 258949_at   | At3g01370 | Unknown protein      | 0.0043 | 0.0148 | 4.27  |
| 259181_at   | At3g01690 | Unknown protein      | 0.0283 | 0.0370 | 3.25  |
| 259240_at   | At3g11590 | Unknown protein      | 0.0053 | 0.0163 | 3.58  |
| 251753_at   | At3g55760 | Unknown protein      | 0.0019 | 0.0101 | 2.84  |
| 251684_at   | At3g56410 | Unknown protein      | 0.0134 | 0.0255 | 2.95  |
| 251148_at   | At3g63180 | Unknown protein      | 0.0393 | 0.0439 | 2.66  |
| 245517_at   | At4g15840 | Unknown protein      | 0.0219 | 0.0323 | 3.14  |
| 252976_s_at | At4g38550 | Unknown protein      | 0.0383 | 0.0433 | 2.71  |
| 250784_at   | At5g05480 | Unknown protein      | 0.0037 | 0.0140 | 2.56  |
| 246558_at   | At5g15540 | Unknown protein      | 0.0467 | 0.0483 | 3.26  |
| 249936_at   | At5g22450 | Unknown protein      | 0.0073 | 0.0188 | 2.67  |
| 247977_at   | At5g56850 | Unknown protein      | 0.0098 | 0.0216 | 2.96  |
| 247773_at   | At5g58630 | Unknown protein      | 0.0011 | 0.0079 | 5.07  |
| 247649_at   | At5g60030 | Unknown protein      | 0.0001 | 0.0026 | 4.24  |
| 266680_s_at | At2g19850 | Unknown protein      | 0.0045 | 0.0152 | 5.18  |
| 245990_at   | At5g20640 | Unknown protein      | 0.0398 | 0.0442 | 2.75  |
| 248711_at   | At5g48270 | Unknown protein      | 0.0033 | 0.0133 | 13.14 |
| 256542_at   | At1g42550 | Unknown protein      | 0.0005 | 0.0054 | 4.00  |
| 264147_at   | At1g02200 | Unknown Protein      | 0.0001 | 0.0028 | 13.23 |
| 264796_at   | At1g08690 | Unknown Protein      | 0.0290 | 0.0374 | 2.69  |
| 262651_at   | At1g14100 | Unknown Protein      | 0.0260 | 0.0354 | 6.01  |
| 261992_at   | At1g33690 | Unknown Protein      | 0.0016 | 0.0093 | 22.33 |
| 246357_x_at | At1g40550 | Unknown Protein      | 0.0487 | 0.0494 | 3.89  |
| 262064_at   | At1g56075 | Unknown Protein      | 0.0008 | 0.0071 | 3.07  |
| 260448_at   | At1g72400 | Unknown Protein      | 0.0026 | 0.0118 | 4.19  |
| 263059_at   | At2g07670 | Unknown Protein      | 0.0005 | 0.0055 | 5.72  |
| 265980_at   | At2g11160 | Unknown Protein      | 0.0040 | 0.0145 | 8.08  |
| 245081_at   | At2g23280 | Unknown Protein      | 0.0381 | 0.0432 | 2.61  |
| 266833_at   | At2g30030 | Unknown Protein      | 0.0030 | 0.0127 | 13.50 |
| 265797_at   | At2g35715 | Unknown Protein      | 0.0322 | 0.0394 | 7.68  |
| 267067_at   | At2g41030 | Unknown Protein      | 0.0000 | 0.0014 | 6.76  |
| 266437_at   | At2g43170 | Unknown Protein      | 0.0090 | 0.0207 | 4.08  |

|           |           |                 |        |        |      |
|-----------|-----------|-----------------|--------|--------|------|
| 266871_at | At2g44720 | Unknown Protein | 0.0500 | 0.0500 | 5.49 |
| 259047_at | At3g03390 | Unknown Protein | 0.0093 | 0.0210 | 3.18 |
| 258187_at | At3g17870 | Unknown Protein | 0.0101 | 0.0220 | 2.64 |
| 258233_at | At3g27780 | Unknown Protein | 0.0239 | 0.0339 | 3.28 |
| 252171_at | At3g50600 | Unknown Protein | 0.0013 | 0.0085 | 4.96 |
| 255211_at | At4g07610 | Unknown Protein | 0.0039 | 0.0142 | 4.21 |
| 246084_at | At5g20530 | Unknown Protein | 0.0201 | 0.0311 | 3.93 |
| 246845_at | At5g26707 | Unknown Protein | 0.0042 | 0.0147 | 2.76 |
| 246694_at | At5g29080 | Unknown Protein | 0.0039 | 0.0143 | 4.65 |
| 246698_at | At5g30332 | Unknown Protein | 0.0054 | 0.0163 | 5.08 |
| 246675_at | At5g31411 | Unknown Protein | 0.0062 | 0.0174 | 3.13 |
| 248036_at | At5g55915 | Unknown Protein | 0.0121 | 0.0242 | 4.70 |

<sup>a</sup>Probe set ID represents Affymetrix probe set number.

<sup>b</sup>AGI represents *Arabidopsis* Genome Initiative (AGI) locus identifier corresponding to each gene represented on the array.

<sup>c</sup> $q$ -value  $\leq 0.05$  (5% False discovery rate) was used to determine genes differentially expressed in PPV-infected leaves relative to mock-inoculated control leaves.

<sup>d</sup> $p$ -values ( $p \leq 0.05$ ) were derived from the ANOVA and used to calculate  $q$ -value after adjusting the values using Benjamini and Hochberg [21] multiple testing correction.

<sup>e</sup>Calculation of fold changes was defined in Methods.

<sup>f</sup>Determined following the method of the *Arabidopsis* MIPS (Munich Information Centre for Protein Sequences) functional classification scheme.
