# Supplementary material for: Altered gene expression changes in Arabidopsis leaf tissues and protoplasts in response to Plum pox virus infection
Source: PubMed Central journal article supplement (PMC2478689; doi:10.1186/1471-2164-9-325), 2008-07-09
Supplement: 1471-2164-9-325-S2.pdf [file 1471-2164-9-325-S2.pdf]

**Supplemental Table 2.** Expression levels of genes repressed in PPV-infected *Arabidopsis* leaf tissues 17 days post inoculation

| Probe set IDs <sup>a</sup>            | AGI <sup>b</sup> locus | Description                                                 | <i>q</i> -value <sup>c</sup> | <i>p</i> -value <sup>d</sup> | Fold change <sup>e</sup> |
|---------------------------------------|------------------------|-------------------------------------------------------------|------------------------------|------------------------------|--------------------------|
| A. Defence and virulence <sup>f</sup> |                        |                                                             |                              |                              |                          |
| 249514_at                             | At5g38480              | 14-3-3 protein; GRF3                                        | 0.0241                       | 0.0341                       | -3.1                     |
| 266620_at                             | At2g35450              | Amidohydrolase family                                       | 0.0463                       | 0.0480                       | -3.5                     |
| 266851_at                             | At2g26820              | Avirulence induced gene; AIG1 family protein                | 0.0019                       | 0.0102                       | -4.8                     |
| 258002_at                             | At3g28930              | AvrRpt2-induced AIG2 protein; AIG2                          | 0.0460                       | 0.0479                       | -2.8                     |
| 253674_at                             | At4g29540              | Bacterial transferase hexapeptide repeat-containing protein | 0.0100                       | 0.0218                       | -3.9                     |
| 252170_at                             | At3g50480              | Broad-spectrum mildew resistance RPW8 family protein        | 0.0237                       | 0.0338                       | -3.2                     |
| 260560_at                             | At2g43590              | Chitinase, putative                                         | 0.0156                       | 0.0274                       | -5.7                     |
| 251895_at                             | At3g54420              | Class IV chitinase; CHIV                                    | 0.0044                       | 0.0150                       | -4.5                     |
| 258897_at                             | At3g05730              | Defensin like family protein                                | 0.0000                       | 0.0014                       | -6.8                     |
| 258798_at                             | At3g04540              | Defensin like family protein                                | 0.0383                       | 0.0433                       | -7.6                     |
| 255319_at                             | At4g04220              | Disease resistance family protein                           | 0.0225                       | 0.0329                       | -10.4                    |
| 267546_at                             | At2g32680              | Disease resistance family protein                           | 0.0017                       | 0.0096                       | -2.6                     |
| 267548_at                             | At2g32660              | Disease resistance family protein / LRR family protein      | 0.0023                       | 0.0111                       | -13.4                    |
| 259893_at                             | At1g71390              | Disease resistance family protein / LRR family protein      | 0.0018                       | 0.0099                       | -7.2                     |
| 259534_at                             | At1g12290              | Disease resistance protein; CC-NBS-LRR class, putative      | 0.0029                       | 0.0123                       | -6.7                     |
| 248836_at                             | At5g47260              | Disease resistance protein; CC-NBS-LRR class, putative      | 0.0329                       | 0.0399                       | -3.8                     |
| 257276_at                             | At3g14460              | Disease resistance protein; NBS-LRR class, putative         | 0.0022                       | 0.0107                       | -7.7                     |
| 264153_at                             | At1g65390              | Disease resistance protein; TIR class, putative             | 0.0290                       | 0.0374                       | -3.7                     |
| 260713_at                             | At1g17615              | Disease resistance protein; TIR-NBS class, putative         | 0.0048                       | 0.0156                       | -16.5                    |
| 248993_at                             | At5g45240              | Disease resistance protein; TIR-NBS-LRR class, putative     | 0.0005                       | 0.0057                       | -8.4                     |
| 249311_at                             | At5g41540              | Disease resistance protein; TIR-NBS-LRR class, putative     | 0.0192                       | 0.0303                       | -3.5                     |
| 254582_at                             | At4g19470              | Disease resistance protein-related                          | 0.0066                       | 0.0180                       | -7.9                     |
| 255937_at                             | At1g12610              | DRE-binding protein, putative                               | 0.0187                       | 0.0300                       | -5.5                     |
| 254074_at                             | At4g25490              | DRE-binding protein; DREB1B                                 | 0.0123                       | 0.0245                       | -3.9                     |
| 255504_at                             | At4g02200              | Drought-responsive family protein                           | 0.0122                       | 0.0243                       | -3.9                     |
| 246824_at                             | At5g26990              | Drought-responsive family protein                           | 0.0056                       | 0.0167                       | -3.5                     |
| 257641_s_at                           | At5g25760              | Early-responsive to dehydration stress protein; ERD12       | 0.0128                       | 0.0249                       | -2.6                     |
| 245505_at                             | At4g15690              | Glutaredoxin family protein                                 | 0.0220                       | 0.0324                       | -24.2                    |
| 245506_at                             | At4g15700              | Glutaredoxin family protein                                 | 0.0063                       | 0.0175                       | -12.3                    |
| 263168_at                             | At1g03020              | Glutaredoxin family protein                                 | 0.0318                       | 0.0392                       | -5.0                     |
| 265067_at                             | At1g03850              | Glutaredoxin family protein                                 | 0.0046                       | 0.0153                       | -4.8                     |
| 260831_at                             | At1g06830              | Glutaredoxin family protein                                 | 0.0100                       | 0.0219                       | -3.8                     |
| 256583_at                             | At3g28850              | Glutaredoxin family protein                                 | 0.0289                       | 0.0373                       | -2.9                     |
| 249996_at                             | At5g18600              | Glutaredoxin family protein                                 | 0.0004                       | 0.0048                       | -2.8                     |
| 249380_at                             | At5g40370              | Glutaredoxin family protein                                 | 0.0071                       | 0.0185                       | -4.1                     |
| 246092_at                             | At5g20500              | Glutaredoxin family protein                                 | 0.0027                       | 0.0119                       | -3.4                     |
| 260225_at                             | At1g74590              | Glutathione S-transferase, putative                         | 0.0405                       | 0.0446                       | -6.0                     |
| 262120_at                             | At1g02950              | Glutathione S-transferase, putative                         | 0.0171                       | 0.0286                       | -4.5                     |
| 266267_at                             | At2g29460              | Glutathione S-transferase, putative                         | 0.0109                       | 0.0229                       | -3.6                     |
| 260406_at                             | At1g69920              | Glutathione S-transferase, putative                         | 0.0027                       | 0.0119                       | -3.5                     |
| 262119_s_at                           | At1g02930              | Glutathione S-transferase, putative                         | 0.0272                       | 0.0362                       | -3.5                     |
| 261311_at                             | At1g05770              | Jacalin lectin family protein                               | 0.0005                       | 0.0054                       | -2.6                     |
| 257206_at                             | At3g16530              | Legume lectin family protein                                | 0.0002                       | 0.0037                       | -5.6                     |
| 251065_at                             | At5g01870              | Lipid transfer protein, putative                            | 0.0229                       | 0.0332                       | -5.2                     |
| 260904_at                             | At1g02450              | NPR1/NIM1-interacting protein 1; NIMIN-1                    | 0.0499                       | 0.0499                       | -4.9                     |
| 261572_at                             | At1g01170              | Ozone-responsive stress-related protein, putative           | 0.0022                       | 0.0106                       | -4.0                     |
| 265586_at                             | At2g19990              | Pathogenesis-related protein 1; PR-1                        | 0.0288                       | 0.0373                       | -10.6                    |
| 259925_at                             | At1g75040              | Pathogenesis-related protein 5; PR-5                        | 0.0003                       | 0.0041                       | -7.7                     |
| 258722_at                             | At3g09590              | Pathogenesis-related protein, putative                      | 0.0061                       | 0.0173                       | -18.1                    |
| 257077_at                             | At3g19690              | Pathogenesis-related protein, putative                      | 0.0187                       | 0.0300                       | -9.8                     |
| 249439_at                             | At5g40020              | Pathogenesis-related thaumatin family protein               | 0.0009                       | 0.0071                       | -8.8                     |
| 260655_at                             | At1g19320              | Pathogenesis-related thaumatin family protein               | 0.0059                       | 0.0170                       | -4.3                     |
| 257365_x_at                           | At2g26020              | Plantdefensin-fusion protein, putative; PDF1.2b             | 0.0010                       | 0.0076                       | -45.7                    |
| 266141_at                             | At2g02120              | Plantdefensin-fusion protein, putative; PDF2.1              | 0.0028                       | 0.0123                       | -25.8                    |
| 255554_at                             | At4g01895              | SAR regulator protein NIMIN-1-related                       | 0.0054                       | 0.0164                       | -4.4                     |
| 252135_at                             | At3g50830              | Stress-responsive protein, putative                         | 0.0223                       | 0.0328                       | -3.6                     |
| 256527_at                             | At1g66100              | Thionin, putative                                           | 0.0183                       | 0.0297                       | -4.8                     |
| 249645_at                             | At5g36910              | Thionin; THI2.2                                             | 0.0003                       | 0.0043                       | -5.4                     |
| 266048_at                             | At2g40790              | Thioredoxin family protein                                  | 0.0015                       | 0.0091                       | -13.7                    |
| 261821_at                             | At1g11530              | Thioredoxin family protein                                  | 0.0257                       | 0.0353                       | -5.4                     |
| 253693_at                             | At4g29670              | Thioredoxin family protein                                  | 0.0035                       | 0.0135                       | -4.4                     |
| 258665_at                             | At3g08710              | Thioredoxin family protein                                  | 0.0147                       | 0.0266                       | -4.0                     |
| 250649_at                             | At5g06690              | Thioredoxin family protein                                  | 0.0037                       | 0.0139                       | -3.3                     |
| 262721_at                             | At1g43560              | Thioredoxin family protein                                  | 0.0004                       | 0.0053                       | -3.3                     |

|           |           |                                              |        |        |       |
|-----------|-----------|----------------------------------------------|--------|--------|-------|
| 257495_at | At1g07960 | Thioredoxin family protein                   | 0.0128 | 0.0250 | -2.7  |
| 249385_at | At5g39950 | Thioredoxin H-type 2; TRX-H-2                | 0.0076 | 0.0191 | -2.9  |
| 260943_at | At1g45145 | Thioredoxin H-type 5; TRX-H-5                | 0.0017 | 0.0096 | -11.5 |
| 250133_at | At5g16400 | Thioredoxin, putative                        | 0.0038 | 0.0140 | -3.1  |
| 257910_at | At3g25580 | Thioredoxin-related                          | 0.0372 | 0.0426 | -2.5  |
| 260551_at | At2g43510 | Trypsin inhibitor, putative                  | 0.0122 | 0.0244 | -6.7  |
| 260541_at | At2g43530 | Trypsin inhibitor, putative                  | 0.0035 | 0.0135 | -3.9  |
| 254775_at | At4g13450 | Universal stress protein; USP family protein | 0.0068 | 0.0181 | -6.9  |
| 266458_at | At2g47710 | Universal stress protein; USP family protein | 0.0067 | 0.0180 | -2.7  |
| 257892_at | At3g17020 | Universal stress protein; USP family protein | 0.0009 | 0.0072 | -2.6  |
| 255807_at | At4g10270 | Wound-responsive family protein              | 0.0309 | 0.0387 | -6.9  |
| 248159_at | At5g54460 | Wound-responsive protein-related             | 0.0271 | 0.0361 | -10.2 |
| 258821_at | At3g07230 | Wound-responsive protein-related             | 0.0004 | 0.0049 | -7.5  |

#### A1. Protein folding/heat shock/chaperone activity

|           |           |                                                      |        |        |       |
|-----------|-----------|------------------------------------------------------|--------|--------|-------|
| 260714_at | At1g14980 | Chaperonin; CPN10                                    | 0.0070 | 0.0183 | -2.8  |
| 259824_at | At1g66240 | Copper chaperone, putative; CCH                      | 0.0001 | 0.0026 | -3.1  |
| 251733_at | At3g56240 | Copper chaperone; CCH                                | 0.0015 | 0.0091 | -4.1  |
| 267462_at | At2g33735 | DNAJ heat shock N-terminal domain-containing protein | 0.0216 | 0.0321 | -6.6  |
| 258716_at | At3g09700 | DNAJ heat shock N-terminal domain-containing protein | 0.0325 | 0.0397 | -3.5  |
| 256999_at | At3g14200 | DNAJ heat shock N-terminal domain-containing protein | 0.0188 | 0.0300 | -3.3  |
| 248637_at | At5g49060 | DNAJ heat shock N-terminal domain-containing protein | 0.0421 | 0.0456 | -2.9  |
| 265826_at | At2g35795 | DNAJ heat shock N-terminal domain-containing protein | 0.0111 | 0.0231 | -2.7  |
| 245800_at | At1g46264 | Heat shock family protein                            | 0.0062 | 0.0174 | -5.4  |
| 266841_at | At2g26150 | Heat shock family protein                            | 0.0123 | 0.0245 | -5.0  |
| 247691_at | At5g59720 | Heat shock protein; HSP18                            | 0.0101 | 0.0220 | -8.3  |
| 254384_at | At4g21870 | Heat shock protein; HSP26                            | 0.0375 | 0.0428 | -12.7 |
| 249575_at | At5g37670 | Small heat shock protein-like; HSP15                 | 0.0189 | 0.0301 | -3.2  |

#### A2. Cell wall associated transcripts

##### A2.1. Reassembly of cell wall associated genes

|             |           |                                                          |        |        |       |
|-------------|-----------|----------------------------------------------------------|--------|--------|-------|
| 258895_at   | At3g05600 | Epoxide hydrolase, putative                              | 0.0224 | 0.0328 | -12.3 |
| 261245_at   | At1g20130 | Extracellular lipase, putative                           | 0.0166 | 0.0282 | -5.1  |
| 257441_at   | At2g04020 | GDSL-motif lipase/hydrolase family protein               | 0.0037 | 0.0139 | -14.9 |
| 263789_at   | At2g24560 | GDSL-motif lipase/hydrolase family protein               | 0.0061 | 0.0173 | -14.5 |
| 250519_at   | At5g08460 | GDSL-motif lipase/hydrolase family protein               | 0.0065 | 0.0178 | -11.8 |
| 249277_at   | At5g41890 | GDSL-motif lipase/hydrolase family protein               | 0.0049 | 0.0157 | -9.8  |
| 250043_at   | At5g18430 | GDSL-motif lipase/hydrolase family protein               | 0.0171 | 0.0286 | -9.0  |
| 246526_at   | At5g15720 | GDSL-motif lipase/hydrolase family protein               | 0.0322 | 0.0394 | -6.3  |
| 250918_at   | At5g03610 | GDSL-motif lipase/hydrolase family protein               | 0.0250 | 0.0348 | -2.7  |
| 259935_at   | At1g71250 | GDSL-motif lipase/hydrolase family protein               | 0.0117 | 0.0237 | -2.5  |
| 250082_at   | At5g17200 | Glycoside hydrolase family 28 protein                    | 0.0022 | 0.0107 | -18.1 |
| 254733_at   | At4g13760 | Glycoside hydrolase family 28 protein                    | 0.0097 | 0.0216 | -5.2  |
| 266558_at   | At2g23900 | Glycoside hydrolase family 28 protein                    | 0.0088 | 0.0205 | -4.5  |
| 254339_at   | At4g22100 | Glycosyl hydrolase family 1 protein                      | 0.0300 | 0.0381 | -13.3 |
| 248168_at   | At5g54570 | Glycosyl hydrolase family 1 protein                      | 0.0461 | 0.0479 | -8.8  |
| 255150_at   | At4g08160 | Glycosyl hydrolase family 10 protein                     | 0.0069 | 0.0181 | -4.8  |
| 267620_at   | At2g39640 | Glycosyl hydrolase family 17 protein                     | 0.0295 | 0.0378 | -4.7  |
| 258805_at   | At3g04010 | Glycosyl hydrolase family 17 protein                     | 0.0056 | 0.0168 | -3.7  |
| 251625_at   | At3g57260 | Glycosyl hydrolase family 17 protein                     | 0.0016 | 0.0094 | -3.7  |
| 253226_at   | At4g35010 | Glycosyl hydrolase family 35 protein                     | 0.0328 | 0.0398 | -4.2  |
| 253809_at   | At4g28320 | Glycosyl hydrolase family 5 protein                      | 0.0006 | 0.0063 | -6.4  |
| 252920_at   | At4g39000 | Glycosyl hydrolase family 9 protein                      | 0.0003 | 0.0044 | -3.6  |
| 254202_at   | At4g24140 | Hydrolase; alpha/beta fold family protein                | 0.0424 | 0.0457 | -6.1  |
| 265341_at   | At2g18360 | Hydrolase; alpha/beta fold family protein                | 0.0240 | 0.0340 | -4.7  |
| 261032_at   | At1g17430 | Hydrolase; alpha/beta fold family protein                | 0.0048 | 0.0155 | -3.9  |
| 267126_s_at | At2g23590 | Hydrolase; alpha/beta fold family protein                | 0.0158 | 0.0276 | -2.6  |
| 260051_at   | At1g78210 | Hydrolase; alpha/beta fold family protein                | 0.0285 | 0.0371 | -2.6  |
| 262475_at   | At1g50340 | Invertase/pectin methylesterase inhibitor family protein | 0.0000 | 0.0006 | -17.3 |
| 247246_at   | At5g64620 | Invertase/pectin methylesterase inhibitor family protein | 0.0143 | 0.0263 | -4.2  |
| 259616_at   | At1g47960 | Invertase/pectin methylesterase inhibitor family protein | 0.0039 | 0.0144 | -3.0  |
| 250299_at   | At5g11910 | Lipase family protein                                    | 0.0093 | 0.0211 | -2.8  |
| 266475_at   | At2g31100 | Lipase, putative                                         | 0.0285 | 0.0371 | -3.8  |
| 254689_at   | At4g13710 | Pectate lyase family protein                             | 0.0003 | 0.0040 | -4.6  |
| 260962_at   | At1g44980 | Pectinesterase family protein                            | 0.0319 | 0.0392 | -5.5  |

##### A2.2. Matrix polymers

|           |           |                                        |        |        |      |
|-----------|-----------|----------------------------------------|--------|--------|------|
| 259997_at | At1g67880 | Glycosyl transferase family 17 protein | 0.0395 | 0.0440 | -2.5 |
|-----------|-----------|----------------------------------------|--------|--------|------|

|           |           |                                                          |        |        |       |
|-----------|-----------|----------------------------------------------------------|--------|--------|-------|
| 261877_at | At1g50580 | Glycosyltransferase family protein                       | 0.0022 | 0.0108 | -3.4  |
| 263861_at | At2g04560 | Glycotransferase family protein 19                       | 0.0273 | 0.0363 | -10.1 |
| 248725_at | At5g47980 | Transferase family protein                               | 0.0136 | 0.0257 | -10.1 |
| 253721_at | At4g29250 | Transferase family protein                               | 0.0306 | 0.0385 | -4.2  |
| 245068_at | At2g23260 | UDP-glucuronosyl/UDP-glucosyl transferase family protein | 0.0476 | 0.0487 | -4.6  |
| 256053_at | At1g07260 | UDP-glucuronosyl/UDP-glucosyl transferase family protein | 0.0429 | 0.0461 | -2.8  |
| 262652_at | At1g14110 | Xyloglucan fucosyltransferase family protein             | 0.0059 | 0.0170 | -8.7  |
| 263565_at | At2g15390 | Xyloglucan fucosyltransferase, putative; FUT4            | 0.0089 | 0.0207 | -2.8  |

#### A2.3. Structural proteins

|           |           |                                                              |        |        |      |
|-----------|-----------|--------------------------------------------------------------|--------|--------|------|
| 257986_at | At3g20865 | Arabinogalactan-protein, putative;AGP                        | 0.0445 | 0.0471 | -9.9 |
| 263453_at | At2g22180 | Hydroxyproline-rich glycoprotein family protein              | 0.0260 | 0.0354 | -5.3 |
| 258558_at | At3g06000 | Leucine-rich repeat family protein                           | 0.0078 | 0.0193 | -9.5 |
| 257139_at | At3g28890 | Leucine-rich repeat family protein                           | 0.0327 | 0.0398 | -8.2 |
| 261989_at | At1g33670 | Leucine-rich repeat family protein                           | 0.0260 | 0.0354 | -8.0 |
| 250577_at | At5g07910 | Leucine-rich repeat family protein                           | 0.0040 | 0.0145 | -4.3 |
| 265536_at | At2g15880 | Leucine-rich repeat family protein / extensin family protein | 0.0382 | 0.0433 | -5.6 |
| 246366_at | At1g51850 | Leucine-rich repeat protein, putative                        | 0.0465 | 0.0481 | -3.6 |
| 254467_at | At4g20450 | Leucine-rich repeat protein, putative                        | 0.0138 | 0.0258 | -3.4 |
| 252518_at | At3g46350 | Leucine-rich repeat protein, putative                        | 0.0001 | 0.0026 | -3.1 |
| 252517_at | At3g46340 | Leucine-rich repeat protein, putative                        | 0.0126 | 0.0247 | -3.0 |
| 260750_at | At1g49100 | Leucine-rich repeat protein, putative                        | 0.0059 | 0.0171 | -2.9 |
| 245992_at | At5g20690 | Leucine-rich repeat protein, putative                        | 0.0000 | 0.0006 | -8.8 |
| 249013_at | At5g44700 | Leucine-rich repeat protein, putative                        | 0.0361 | 0.0419 | -8.0 |
| 261527_at | At1g14390 | Leucine-rich repeat protein, putative                        | 0.0419 | 0.0454 | -4.8 |
| 252197_at | At3g50230 | Leucine-rich repeat protein, putative                        | 0.0162 | 0.0280 | -3.0 |
| 252940_at | At4g39270 | Leucine-rich repeat protein, putative                        | 0.0135 | 0.0256 | -2.8 |
| 250348_at | At5g11990 | Proline-rich family protein                                  | 0.0040 | 0.0145 | -7.0 |
| 256352_at | At1g54970 | Proline-rich family protein                                  | 0.0107 | 0.0226 | -5.3 |
| 259720_at | At1g61080 | Proline-rich family protein                                  | 0.0040 | 0.0145 | -4.1 |
| 258543_at | At3g06870 | Proline-rich family protein                                  | 0.0255 | 0.0351 | -3.8 |
| 247560_at | At5g61090 | Proline-rich family protein                                  | 0.0266 | 0.0358 | -2.9 |
| 248636_at | At5g49080 | Proline-rich -like family protein                            | 0.0104 | 0.0223 | -4.2 |

#### A2.4. Expansins

|           |           |                                 |        |        |       |
|-----------|-----------|---------------------------------|--------|--------|-------|
| 266215_at | At2g06850 | Xyloglucan endotransglycosylase | 0.0170 | 0.0285 | -3.0  |
| 247925_at | At5g57560 | Xyloglucan endotransglycosylase | 0.0224 | 0.0328 | -3.8  |
| 254598_at | At4g18990 | Xyloglucan endotransglycosylase | 0.0090 | 0.0208 | -13.9 |
| 248732_at | At5g48070 | Xyloglucan endotransglycosylase | 0.0000 | 0.0017 | -5.9  |
| 266376_at | At2g14620 | Xyloglucan endotransglycosylase | 0.0362 | 0.0420 | -5.8  |
| 257203_at | At3g23730 | Xyloglucan endotransglycosylase | 0.0178 | 0.0291 | -3.9  |
| 254801_at | At4g13080 | Xyloglucan endotransglycosylase | 0.0120 | 0.0240 | -3.3  |
| 255433_at | At4g03210 | Xyloglucan endotransglycosylase | 0.0369 | 0.0424 | -3.1  |
| 247162_at | At5g65730 | Xyloglucan endotransglycosylase | 0.0035 | 0.0135 | -2.6  |

#### B. Cellular communication/Signal transduction mechanism/transmembrane signal transduction

|           |           |                                                  |        |        |       |
|-----------|-----------|--------------------------------------------------|--------|--------|-------|
| 254605_at | At4g18950 | Ankyrin protein kinase, putative                 | 0.0031 | 0.0128 | -3.7  |
| 267118_at | At2g32590 | Barren family protein                            | 0.0206 | 0.0314 | -4.3  |
| 248001_at | At5g55990 | Calcineurin B-like protein 2;CBL2                | 0.0465 | 0.0481 | -3.1  |
| 245300_at | At4g16350 | Calcineurin B-like protein 6;CBL6                | 0.0101 | 0.0220 | -12.6 |
| 248827_at | At5g47100 | Calcineurin B-like protein 9;CBL9                | 0.0060 | 0.0172 | -2.5  |
| 249783_at | At5g24270 | Calcineurin B-like protein, putative             | 0.0277 | 0.0366 | -4.4  |
| 259960_at | At1g53710 | Calcineurin-like phosphoesterase family protein  | 0.0019 | 0.0101 | -11.8 |
| 253491_at | At4g31770 | Calcineurin-like phosphoesterase family protein  | 0.0376 | 0.0429 | -3.5  |
| 253128_at | At4g36070 | Calcium-dependent protein kinase family protein  | 0.0074 | 0.0188 | -2.7  |
| 262639_at | At1g62820 | Calmodulin, putative                             | 0.0241 | 0.0341 | -6.6  |
| 256755_at | At3g25600 | Calmodulin, putative                             | 0.0105 | 0.0224 | -3.5  |
| 267064_at | At2g41110 | Calmodulin-2/3/5;CAM2;Cal1                       | 0.0063 | 0.0175 | -4.6  |
| 246290_at | At3g56800 | Calmodulin-2/3/5;CAM3                            | 0.0382 | 0.0433 | -2.9  |
| 266317_at | At2g27030 | Calmodulin-2/3/5;CAM5;TCH1                       | 0.0343 | 0.0408 | -2.8  |
| 252037_at | At3g51920 | Calmodulin-9; CAM9                               | 0.0007 | 0.0064 | -3.2  |
| 267076_at | At2g41090 | Calmodulin-like calcium-binding protein; CaBP-22 | 0.0132 | 0.0253 | -2.5  |
| 266447_at | At2g43290 | Calmodulin-like protein; MSS3                    | 0.0470 | 0.0484 | -3.5  |
| 249583_at | At5g37770 | Calmodulin-related protein 2                     | 0.0003 | 0.0042 | -4.2  |
| 258947_at | At3g01830 | Calmodulin-related protein, putative             | 0.0050 | 0.0158 | -6.6  |
| 249197_at | At5g42380 | Calmodulin-related protein, putative             | 0.0198 | 0.0308 | -5.9  |
| 265494_at | At2g15680 | Calmodulin-related protein, putative             | 0.0142 | 0.0262 | -2.5  |
| 267257_at | At2g23080 | Casein kinase II alpha chain, putative           | 0.0258 | 0.0353 | -2.5  |

|             |           |                                                                                  |        |        |       |
|-------------|-----------|----------------------------------------------------------------------------------|--------|--------|-------|
| 255872_at   | At2g30360 | CBL-interacting protein kinase 11;CIPK11                                         | 0.0058 | 0.0169 | -3.2  |
| 248450_at   | At5g51290 | Ceramide kinase-related                                                          | 0.0027 | 0.0120 | -2.7  |
| 261506_at   | At1g71697 | Choline kinase, putative                                                         | 0.0352 | 0.0414 | -3.0  |
| 248675_at   | At5g48820 | Cyclin-dependent kinase inhibitor 3; ICK3                                        | 0.0097 | 0.0215 | -4.1  |
| 264244_at   | At1g60440 | Eukaryotic pantothenate kinase family protein                                    | 0.0166 | 0.0282 | -2.6  |
| 259071_at   | At3g11650 | harpin-induced family protein / HIN1 family protein / harpin-responsive family p | 0.0143 | 0.0262 | -3.1  |
| 255577_at   | At4g01410 | Harpin-induced family protein; HIN1                                              | 0.0002 | 0.0037 | -2.7  |
| 255404_at   | At4g03153 | Kinase interacting family protein                                                | 0.0004 | 0.0050 | -8.0  |
| 259836_at   | At1g52240 | Kinase partner protein                                                           | 0.0320 | 0.0393 | -8.8  |
| 262932_at   | At1g65820 | Microsomal glutathione s-transferase, putative                                   | 0.0453 | 0.0476 | -4.1  |
| 254924_at   | At4g11330 | Mitogen-activated protein kinase, putative; MPK5                                 | 0.0249 | 0.0347 | -5.3  |
| 254958_at   | At4g11010 | Nucleoside diphosphate kinase 3; NDK3                                            | 0.0049 | 0.0157 | -3.0  |
| 262398_at   | At1g49350 | pfkB-type carbohydrate kinase family protein                                     | 0.0000 | 0.0002 | -2.6  |
| 254897_at   | At4g11470 | Protein kinase family Protein                                                    | 0.0060 | 0.0172 | -12.3 |
| 253227_at   | At4g35030 | Protein kinase family Protein                                                    | 0.0182 | 0.0296 | -9.2  |
| 261611_at   | At1g49730 | Protein kinase family Protein                                                    | 0.0014 | 0.0089 | -9.1  |
| 255653_at   | At4g00960 | Protein kinase family Protein                                                    | 0.0061 | 0.0173 | -9.0  |
| 266651_at   | At2g25760 | Protein kinase family Protein                                                    | 0.0333 | 0.0401 | -5.7  |
| 255820_at   | At2g40580 | Protein kinase family Protein                                                    | 0.0284 | 0.0371 | -5.0  |
| 252494_at   | At3g46760 | Protein kinase family Protein                                                    | 0.0307 | 0.0385 | -5.0  |
| 263748_at   | At2g21480 | Protein kinase family Protein                                                    | 0.0440 | 0.0468 | -3.6  |
| 254246_at   | At4g23250 | Protein kinase family Protein                                                    | 0.0389 | 0.0437 | -3.2  |
| 246146_at   | At5g20050 | Protein kinase family Protein                                                    | 0.0160 | 0.0279 | -3.0  |
| 254271_at   | At4g23150 | Protein kinase family Protein                                                    | 0.0167 | 0.0283 | -2.9  |
| 251603_at   | At3g57760 | Protein kinase family Protein                                                    | 0.0299 | 0.0381 | -2.8  |
| 248119_at   | At5g54590 | Protein kinase family Protein                                                    | 0.0070 | 0.0183 | -2.8  |
| 254869_at   | At4g11890 | Protein kinase family Protein                                                    | 0.0021 | 0.0105 | -2.7  |
| 250365_at   | At5g11410 | Protein kinase family Protein                                                    | 0.0043 | 0.0148 | -2.5  |
| 267582_at   | At2g41970 | Protein kinase, putative                                                         | 0.0115 | 0.0235 | -14.2 |
| 251648_at   | At3g57720 | Protein kinase, putative                                                         | 0.0058 | 0.0170 | -4.1  |
| 248821_at   | At5g47070 | Protein kinase, putative                                                         | 0.0168 | 0.0283 | -3.1  |
| 261089_at   | At1g07570 | Protein kinase; APK1a                                                            | 0.0228 | 0.0332 | -3.0  |
| 252212_at   | At3g50310 | Protein kinase-related                                                           | 0.0098 | 0.0217 | -11.2 |
| 256213_at   | At1g50990 | Protein kinase-related                                                           | 0.0362 | 0.0420 | -10.0 |
| 256044_at   | At1g07160 | Protein phosphatase 2C, putative; PP2C, putative                                 | 0.0383 | 0.0433 | -3.7  |
| 254660_at   | At4g18250 | Receptor serine/threonine kinase, putative                                       | 0.0024 | 0.0113 | -18.5 |
| 254265_s_at | At4g23140 | Receptor-like protein kinase 5; RLK5                                             | 0.0059 | 0.0170 | -4.9  |
| 254252_at   | At4g23310 | Receptor-like protein kinase, putative                                           | 0.0291 | 0.0374 | -7.6  |
| 252549_at   | At3g45860 | Receptor-like protein kinase, putative                                           | 0.0071 | 0.0185 | -3.3  |
| 247600_at   | At5g60890 | Receptor-like protein kinase; ATR1                                               | 0.0067 | 0.0181 | -2.5  |
| 266655_at   | At2g25880 | Serine/threonine protein kinase, putative                                        | 0.0054 | 0.0164 | -17.8 |
| 262240_at   | At1g48220 | Serine/threonine protein kinase, putative                                        | 0.0463 | 0.0480 | -6.6  |
| 258281_at   | At3g26900 | Shikimate kinase family protein                                                  | 0.0002 | 0.0036 | -3.7  |
| 255419_at   | At4g03230 | S-locus lectin protein kinase family protein                                     | 0.0461 | 0.0479 | -7.7  |
| 262480_at   | At1g11340 | S-locus lectin protein kinase family protein                                     | 0.0008 | 0.0070 | -7.3  |
| 262507_at   | At1g11330 | S-locus lectin protein kinase family protein                                     | 0.0112 | 0.0233 | -3.2  |
| 264762_at   | At1g61460 | S-locus protein kinase, putative                                                 | 0.0372 | 0.0425 | -4.5  |
| 256744_at   | At3g29350 | Two-component phosphorelay mediator 1; HP1                                       | 0.0252 | 0.0349 | -2.8  |
| 249473_at   | At5g39340 | Two-component phosphorelay mediator 2; HP2                                       | 0.0164 | 0.0281 | -5.5  |
| 266078_at   | At2g40670 | Two-component responsive regulator; ARR16                                        | 0.0086 | 0.0203 | -3.2  |
| 265116_at   | At1g62480 | Vacuolar calcium-binding protein-related                                         | 0.0043 | 0.0149 | -4.3  |
| 260657_at   | At1g19390 | Wall-associated kinase, putative                                                 | 0.0399 | 0.0442 | -3.1  |

#### C. Cell Cycle/ DNA processing/chromatin regulation and cytoskeleton reorganization

|           |           |                                             |        |        |       |
|-----------|-----------|---------------------------------------------|--------|--------|-------|
| 264089_at | At2g31200 | Actin-depolymerizing factor 6; ADF6         | 0.0192 | 0.0303 | -4.1  |
| 253217_at | At4g34970 | Actin-depolymerizing factor, putative       | 0.0015 | 0.0090 | -10.9 |
| 252565_at | At3g46000 | Actin-depolymerizing factor, putative; ADF2 | 0.0139 | 0.0259 | -4.5  |
| 250454_at | At5g09830 | BolA-like family protein                    | 0.0015 | 0.0091 | -4.6  |
| 246441_at | At5g17560 | BolA-like family protein                    | 0.0045 | 0.0151 | -4.4  |
| 261631_at | At1g49940 | $\beta$ -Tubulin protein                    | 0.0435 | 0.0465 | -3.0  |
| 253142_at | At4g35520 | DNA mismatch repair family protein          | 0.0178 | 0.0292 | -6.9  |
| 260909_at | At1g02670 | DNA repair protein, putative                | 0.0102 | 0.0222 | -18.7 |
| 245525_at | At4g15930 | Dynein light chain, putative                | 0.0045 | 0.0151 | -4.2  |
| 245750_at | At1g51060 | Histone H2A, putative                       | 0.0217 | 0.0322 | -3.1  |
| 264188_at | At1g54690 | Histone H2A, putative                       | 0.0046 | 0.0152 | -2.5  |
| 251846_at | At3g54560 | Histone H2A.F/Z                             | 0.0008 | 0.0069 | -2.6  |
| 252561_at | At3g45980 | Histone H2B                                 | 0.0045 | 0.0151 | -3.7  |
| 247180_at | At5g65350 | Histone H3                                  | 0.0022 | 0.0107 | -24.7 |

|           |           |                                                            |        |        |       |
|-----------|-----------|------------------------------------------------------------|--------|--------|-------|
| 251924_at | At3g53730 | Histone H4                                                 | 0.0042 | 0.0147 | -3.0  |
| 257115_at | At3g20150 | Kinesin motor family protein                               | 0.0004 | 0.0053 | -31.0 |
| 266009_at | At2g37420 | Kinesin motor protein-related                              | 0.0053 | 0.0163 | -4.8  |
| 245174_at | At2g47500 | Kinesin motor protein-related                              | 0.0002 | 0.0034 | -4.3  |
| 252076_at | At3g51660 | Macrophage migration inhibitory factor family protein; MIF | 0.0086 | 0.0202 | -4.1  |
| 247943_at | At5g57170 | Macrophage migration inhibitory factor family protein; MIF | 0.0007 | 0.0064 | -2.7  |
| 253793_at | At4g28710 | Myosin heavy chain, putative                               | 0.0278 | 0.0367 | -3.0  |
| 264763_at | At1g61450 | Myosin II                                                  | 0.0029 | 0.0123 | -2.8  |
| 245162_at | At2g33240 | Myosin, putative                                           | 0.0004 | 0.0050 | -13.1 |
| 259089_at | At3g04960 | NUF1 PROTEIN                                               | 0.0011 | 0.0080 | -12.1 |
| 266394_at | At2g43130 | Ras-related protein; ARA-4                                 | 0.0110 | 0.0230 | -3.2  |
| 252472_at | At3g46830 | Ras-related protein; RAB11A                                | 0.0091 | 0.0208 | -2.5  |
| 264209_at | At1g22740 | Ras-related protein; RAB7                                  | 0.0179 | 0.0292 | -9.2  |
| 248983_at | At5g45130 | Ras-related protein;RHA1                                   | 0.0147 | 0.0266 | -2.6  |
| 252428_at | At3g47660 | Regulator of chromosome condensation; RCC1 family protein  | 0.0098 | 0.0217 | -2.8  |
| 267494_at | At2g30410 | Tubulin folding cofactor A                                 | 0.0016 | 0.0093 | -3.3  |

#### D. Development/storage proteins

|             |           |                                                                 |        |        |       |
|-------------|-----------|-----------------------------------------------------------------|--------|--------|-------|
| 253393_at   | At4g32690 | 2-on-2 hemoglobin; GLB3                                         | 0.0332 | 0.0400 | -3.8  |
| 260238_at   | At1g74520 | ABA-responsive protein;HVA22a                                   | 0.0116 | 0.0236 | -3.1  |
| 262799_at   | At1g20970 | Adhesin-related                                                 | 0.0305 | 0.0384 | -2.5  |
| 260013_at   | At1g68090 | Annexin 5; ANN5                                                 | 0.0498 | 0.0499 | -6.1  |
| 250473_at   | At5g10220 | Annexin 6; ANN6                                                 | 0.0003 | 0.0043 | -17.7 |
| 262992_at   | At1g54210 | Autophagy 12a; APG12a                                           | 0.0024 | 0.0113 | -16.2 |
| 264285_at   | At1g62040 | Autophagy 8c; APG8c                                             | 0.0456 | 0.0478 | -4.1  |
| 265510_at   | At2g05630 | Autophagy 8d; APG8d                                             | 0.0083 | 0.0200 | -3.3  |
| 266106_at   | At2g45170 | Autophagy 8e; APG8e                                             | 0.0338 | 0.0404 | -3.7  |
| 245391_at   | At4g16520 | Autophagy 8f; APG8f                                             | 0.0031 | 0.0128 | -3.4  |
| 251393_at   | At3g60640 | Autophagy 8g; APG8g                                             | 0.0130 | 0.0252 | -5.9  |
| 257293_at   | At3g15580 | Autophagy 8i; APG8i                                             | 0.0014 | 0.0089 | -7.8  |
| 247906_at   | At5g57420 | Auxin (indole-3-acetic acid) induced gene (IAA33)               | 0.0379 | 0.0431 | -5.6  |
| 263890_at   | At2g37030 | Auxin-responsive family protein                                 | 0.0033 | 0.0132 | -11.4 |
| 254809_at   | At4g12410 | Auxin-responsive family protein                                 | 0.0116 | 0.0236 | -5.0  |
| 258653_at   | At3g09870 | Auxin-responsive family protein                                 | 0.0053 | 0.0163 | -4.4  |
| 248243_at   | At5g53590 | Auxin-responsive family protein                                 | 0.0003 | 0.0042 | -3.0  |
| 266322_at   | At2g46690 | Auxin-responsive family protein                                 | 0.0101 | 0.0220 | -2.6  |
| 260152_at   | At1g52830 | Auxin (indole-3-acetic acid) induced gene (IAA6)                | 0.0002 | 0.0039 | -2.6  |
| 247135_at   | At5g66260 | Auxin-responsive protein, putative                              | 0.0014 | 0.0089 | -15.6 |
| 257121_at   | At3g20220 | Auxin-responsive protein, putative                              | 0.0002 | 0.0039 | -5.4  |
| 260427_at   | At1g72430 | Auxin-responsive protein-related                                | 0.0015 | 0.0090 | -5.1  |
| 251579_at   | At3g58170 | Bet1-like SNARE 1-1                                             | 0.0030 | 0.0126 | -2.5  |
| 266134_s_at | At2g45110 | Beta-expansin, putative; EXPB4                                  | 0.0250 | 0.0348 | -6.8  |
| 251336_at   | At3g61190 | BON1-associated protein 1;BAP1                                  | 0.0047 | 0.0154 | -6.0  |
| 257363_at   | At2g45760 | BON1-associated protein;BAP1-related                            | 0.0011 | 0.0078 | -4.4  |
| 252409_at   | At3g47650 | Bundle-sheath defective protein 2 family / bsd2 family          | 0.0037 | 0.0139 | -4.9  |
| 265624_at   | At2g27250 | CLAVATA3                                                        | 0.0026 | 0.0118 | -3.7  |
| 257513_s_at | At1g12340 | Cornichon family protein                                        | 0.0315 | 0.0390 | -2.9  |
| 262102_at   | At1g02980 | Cullin family protein                                           | 0.0015 | 0.0091 | -3.1  |
| 259124_at   | At3g02310 | Developmental protein SEPALLATA2                                | 0.0133 | 0.0254 | -12.4 |
| 256847_at   | At3g27950 | Early nodule-specific protein, putative                         | 0.0051 | 0.0160 | -9.6  |
| 257927_at   | At3g23240 | Ethylene-responsive factor 1 / ethylene response factor 1; ERF1 | 0.0005 | 0.0058 | -4.3  |
| 260783_at   | At1g06160 | Ethylene-responsive factor, putative                            | 0.0007 | 0.0063 | -2.8  |
| 257918_at   | At3g23230 | Ethylene-responsive factor, putative                            | 0.0163 | 0.0280 | -2.7  |
| 249042_at   | At5g44350 | Ethylene-responsive factor, putative                            | 0.0046 | 0.0153 | -3.0  |
| 263179_at   | At1g05710 | Ethylene-responsive factor, putative                            | 0.0163 | 0.0280 | -5.3  |
| 252563_at   | At3g45970 | Expansin family protein; EXPL1                                  | 0.0256 | 0.0352 | -4.7  |
| 266070_at   | At2g18660 | Expansin family protein; EXPR3                                  | 0.0073 | 0.0188 | -8.4  |
| 253616_at   | At4g30380 | Expansin-related                                                | 0.0202 | 0.0311 | -3.7  |
| 251898_at   | At3g54340 | Floral homeotic protein APETALA3; AP3                           | 0.0199 | 0.0309 | -17.3 |
| 245226_at   | At3g29970 | Germination protein-related                                     | 0.0012 | 0.0082 | -2.8  |
| 247657_at   | At5g59845 | Gibberellin-regulated family protein                            | 0.0080 | 0.0196 | -4.6  |
| 250109_at   | At5g15230 | Gibberellin-regulated protein 4; GASA4                          | 0.0008 | 0.0069 | -3.8  |
| 264195_at   | At1g22690 | Gibberellin-responsive protein, putative                        | 0.0148 | 0.0268 | -8.0  |
| 260221_at   | At1g74670 | Gibberellin-responsive protein, putative                        | 0.0053 | 0.0163 | -6.9  |
| 250415_at   | At5g11210 | Glutamate receptor family protein; GLR2                         | 0.0001 | 0.0031 | -11.9 |
| 250605_at   | At5g07570 | Glycine-rich protein                                            | 0.0386 | 0.0435 | -15.9 |
| 263409_at   | At2g04063 | Glycine-rich protein                                            | 0.0004 | 0.0049 | -14.7 |
| 249839_at   | At5g23405 | High mobility group; HMG1/2 family protein                      | 0.0006 | 0.0063 | -9.4  |

|                                                                   |           |                                                                   |        |        |       |
|-------------------------------------------------------------------|-----------|-------------------------------------------------------------------|--------|--------|-------|
| 247634_at                                                         | At5g60520 | Late embryogenesis abundant protein-related                       | 0.0366 | 0.0422 | -8.6  |
| 245340_at                                                         | At4g14420 | Lesion inducing protein-related                                   | 0.0302 | 0.0382 | -2.8  |
| 245267_at                                                         | At4g14060 | Major latex protein-related                                       | 0.0361 | 0.0419 | -5.4  |
| 265705_at                                                         | At2g03410 | Mo25 family protein                                               | 0.0240 | 0.0340 | -4.5  |
| 255017_at                                                         | At4g10100 | Molybdenum cofactor synthesis family protein                      | 0.0131 | 0.0253 | -3.9  |
| 264617_at                                                         | At2g17660 | Nitrate-responsive NOI protein, putative                          | 0.0003 | 0.0043 | -8.5  |
| 247317_at                                                         | At5g64060 | No apical meristem; NAM family protein                            | 0.0381 | 0.0432 | -5.8  |
| 248469_at                                                         | At5g50820 | No apical meristem; NAM family protein                            | 0.0433 | 0.0463 | -4.8  |
| 249940_at                                                         | At5g22380 | No apical meristem; NAM family protein                            | 0.0476 | 0.0487 | -3.1  |
| 245987_at                                                         | At5g13180 | No apical meristem; NAM family protein                            | 0.0009 | 0.0073 | -2.5  |
| 260851_at                                                         | At1g21890 | Nodulin MtN21 family protein                                      | 0.0000 | 0.0000 | -11.1 |
| 261868_s_at                                                       | At1g11460 | Nodulin MtN21 family protein                                      | 0.0160 | 0.0279 | -3.9  |
| 260433_at                                                         | At1g68170 | Nodulin MtN21 family protein                                      | 0.0085 | 0.0202 | -2.6  |
| 261829_at                                                         | At1g10680 | P-glycoprotein, putative                                          | 0.0084 | 0.0201 | -3.8  |
| 257842_at                                                         | At3g28390 | P-glycoprotein, putative                                          | 0.0388 | 0.0436 | -2.5  |
| 245757_at                                                         | At1g35140 | Phosphate-responsive protein, putative                            | 0.0309 | 0.0387 | -3.5  |
| 255064_at                                                         | At4g08950 | Phosphate-responsive protein, putative                            | 0.0197 | 0.0307 | -3.2  |
| 267317_at                                                         | At2g34700 | Pollen Ole e 1 allergen family protein                            | 0.0211 | 0.0318 | -16.0 |
| 260888_at                                                         | At1g29140 | Pollen Ole e 1 allergen family protein                            | 0.0394 | 0.0439 | -3.3  |
| 248149_at                                                         | At5g54855 | Pollen Ole e 1 allergen family protein                            | 0.0002 | 0.0032 | -2.8  |
| 264399_at                                                         | At1g61780 | Postsynaptic protein-related                                      | 0.0092 | 0.0210 | -4.7  |
| 249083_at                                                         | At5g44140 | Prohibitin, putative                                              | 0.0004 | 0.0051 | -12.8 |
| 252346_at                                                         | At3g48650 | Pseudogene; At14a-related protein                                 | 0.0347 | 0.0411 | -4.1  |
| 245658_at                                                         | At1g28270 | Rapid alkalization factor; RALF family protein                    | 0.0309 | 0.0386 | -5.0  |
| 259106_at                                                         | At3g05490 | Rapid alkalization factor; RALF family protein                    | 0.0146 | 0.0265 | -4.1  |
| 245385_at                                                         | At4g14020 | Rapid alkalization factor; RALF family protein                    | 0.0159 | 0.0277 | -2.7  |
| 262249_at                                                         | At1g48380 | Root hair initiation protein root hairless 1;RHL1                 | 0.0110 | 0.0230 | -2.6  |
| 246761_at                                                         | At5g27980 | Seed maturation family protein                                    | 0.0155 | 0.0274 | -11.4 |
| 264610_at                                                         | At1g04645 | Self-incompatibility protein-related                              | 0.0274 | 0.0363 | -17.7 |
| 250325_s_at                                                       | At5g12060 | Self-incompatibility protein-related                              | 0.0038 | 0.0142 | -13.4 |
| 249868_at                                                         | At5g23030 | Senescence-associated family protein                              | 0.0279 | 0.0367 | -3.7  |
| 267293_at                                                         | At2g23810 | Senescence-associated family protein                              | 0.0104 | 0.0223 | -3.0  |
| 260109_at                                                         | At1g63260 | Senescence-associated family protein                              | 0.0172 | 0.0286 | -2.7  |
| 252348_at                                                         | At3g48140 | Senescence-associated family protein                              | 0.0015 | 0.0092 | -2.8  |
| 247897_at                                                         | At5g57810 | Senescence-associated family protein                              | 0.0378 | 0.0430 | -5.5  |
| 248820_at                                                         | At5g47060 | Senescence-associated family protein                              | 0.0399 | 0.0442 | -2.5  |
| 252295_at                                                         | At3g49100 | Signal recognition particle protein, putative; SRP9               | 0.0346 | 0.0410 | -2.9  |
| 260569_at                                                         | At2g43640 | Signal recognition particle; SRP14 family protein                 | 0.0087 | 0.0204 | -3.6  |
| 251492_at                                                         | At3g59280 | Signaling molecule-related                                        | 0.0191 | 0.0302 | -3.2  |
| 263794_at                                                         | At2g24620 | S-locus glycoprotein family protein                               | 0.0172 | 0.0286 | -2.6  |
| 265862_at                                                         | At2g01780 | S-locus glycoprotein, putative                                    | 0.0230 | 0.0332 | -3.8  |
| 252416_at                                                         | At3g47460 | SMC2-like condensin, putative                                     | 0.0392 | 0.0438 | -3.9  |
| 262714_s_at                                                       | At1g16430 | Surfeit locus protein 5 family protein                            | 0.0168 | 0.0283 | -3.0  |
| 262511_at                                                         | At1g11250 | Syntaxin, putative; SYP125                                        | 0.0437 | 0.0466 | -3.1  |
| 250209_at                                                         | At5g14030 | Translocon-associated protein beta; TRAPB family protein          | 0.0008 | 0.0069 | -3.1  |
| 265356_at                                                         | At2g16595 | Translocon-associated protein;TRAP, putative                      | 0.0490 | 0.0495 | -3.9  |
| <b>D1. Chloroplast</b>                                            |           |                                                                   |        |        |       |
| 255046_at                                                         | At4g09650 | ATP synthase delta chain chloroplast, putative                    | 0.0343 | 0.0408 | -2.6  |
| 255659_at                                                         | At4g00895 | ATP synthase delta chain chloroplast, putative                    | 0.0046 | 0.0153 | -2.8  |
| 245924_at                                                         | At5g28750 | Thylakoid assembly protein, putative                              | 0.0312 | 0.0388 | -3.3  |
| 251031_at                                                         | At5g02120 | Thylakoid membrane one helix protein;OHP                          | 0.0133 | 0.0254 | -6.1  |
| <b>E. Metabolism/energy/membrane associated proteins</b>          |           |                                                                   |        |        |       |
| <b>E1. Carbohydrate/soluble sugar/starch/aminoacid metabolism</b> |           |                                                                   |        |        |       |
| 265658_at                                                         | At2g13810 | Aminotransferase class I and II family protein                    | 0.0000 | 0.0006 | -8.9  |
| 253680_at                                                         | At4g29620 | Cytidine aminohydrolase, putative                                 | 0.0147 | 0.0267 | -4.5  |
| 253676_at                                                         | At4g29570 | Cytidine aminohydrolase, putative                                 | 0.0497 | 0.0499 | -2.9  |
| 252369_at                                                         | At3g48540 | Cytidine/deoxycytidylate deaminase family protein                 | 0.0413 | 0.0451 | -4.9  |
| 256633_at                                                         | At3g28340 | Galactinol synthase, putative                                     | 0.0010 | 0.0074 | -7.9  |
| 261239_at                                                         | At1g32930 | Galactosyltransferase family protein                              | 0.0014 | 0.0089 | -11.2 |
| 249729_at                                                         | At5g24410 | Glucosamine/galactosamine-6-phosphate isomerase-related           | 0.0203 | 0.0312 | -9.1  |
| 248368_at                                                         | At5g51950 | Glucose-methanol-choline;GMC oxidoreductase family protein        | 0.0353 | 0.0414 | -4.5  |
| 260743_at                                                         | At1g15040 | Glutamine amidotransferase-related                                | 0.0029 | 0.0125 | -6.4  |
| 249983_at                                                         | At5g18470 | Mannose-binding lectin family protein                             | 0.0001 | 0.0028 | -3.0  |
| 259749_at                                                         | At1g71100 | Ribose 5-phosphate isomerase-related                              | 0.0107 | 0.0226 | -6.8  |
| 246333_at                                                         | At3g44840 | S-adenosyl-L-methionine:carboxyl methyltransferase family protein | 0.0172 | 0.0286 | -4.2  |
| 256319_at                                                         | At1g35910 | Trehalose-6-phosphate phosphatase, putative                       | 0.0257 | 0.0353 | -3.3  |

|                                   |           |                                                                      |        |        |       |
|-----------------------------------|-----------|----------------------------------------------------------------------|--------|--------|-------|
| 259185_at                         | At3g01550 | Triose phosphate/phosphate translocator, putative                    | 0.0496 | 0.0498 | -2.9  |
| E2. Primary /secondary metabolism |           |                                                                      |        |        |       |
| 260324_at                         | At1g63970 | 2C-methyl-D-erythritol 2:4-cyclodiphosphate synthase, putative       | 0.0050 | 0.0158 | -3.2  |
| 267571_at                         | At2g30650 | 3-hydroxyisobutyryl-coenzyme A hydrolase, putative                   | 0.0001 | 0.0026 | -6.3  |
| 250062_at                         | At5g17760 | AAA-type ATPase family protein                                       | 0.0012 | 0.0084 | -19.9 |
| 253846_at                         | At4g28000 | AAA-type ATPase family protein                                       | 0.0070 | 0.0183 | -13.5 |
| 267499_at                         | At2g45500 | AAA-type ATPase family protein                                       | 0.0332 | 0.0400 | -6.3  |
| 266830_at                         | At2g22810 | ACC synthase 4; ACS4                                                 | 0.0113 | 0.0233 | -3.0  |
| 246172_s_at                       | At5g28360 | ACC synthase, putative                                               | 0.0157 | 0.0276 | -2.9  |
| 264162_at                         | At1g65290 | Acyl carrier family protein / ACP family protein                     | 0.0085 | 0.0201 | -3.5  |
| 252780_at                         | At3g42960 | Alcohol dehydrogenase; ATA1                                          | 0.0225 | 0.0329 | -3.8  |
| 257644_at                         | At3g25780 | Allene oxide cyclase, putative                                       | 0.0246 | 0.0344 | -4.7  |
| 260706_at                         | At1g32350 | Alternative oxidase, putative                                        | 0.0372 | 0.0425 | -3.3  |
| 254335_at                         | At4g22260 | Alternative oxidase, putative                                        | 0.0043 | 0.0147 | -2.8  |
| 255299_at                         | At4g04880 | AMP deaminase family protein                                         | 0.0127 | 0.0248 | -3.1  |
| 259182_at                         | At3g01750 | Ankyrin repeat family protein                                        | 0.0000 | 0.0006 | -28.4 |
| 248123_at                         | At5g54720 | Ankyrin repeat family protein                                        | 0.0000 | 0.0018 | -18.1 |
| 257806_at                         | At3g18670 | Ankyrin repeat family protein                                        | 0.0198 | 0.0308 | -15.1 |
| 262447_at                         | At1g49250 | ATP dependent DNA ligase family protein                              | 0.0064 | 0.0177 | -10.9 |
| 256374_at                         | At1g66730 | ATP dependent DNA ligase family protein                              | 0.0205 | 0.0314 | -4.9  |
| 256184_at                         | At1g51650 | ATP synthase epsilon chain; mitochondrial                            | 0.0033 | 0.0132 | -5.7  |
| 248098_at                         | At5g55290 | ATP synthase subunit H family protein                                | 0.0304 | 0.0383 | -3.3  |
| 263546_at                         | At2g21550 | Bifunctional dihydrofolate reductase-thymidylate synthase, putative  | 0.0265 | 0.0357 | -7.0  |
| 262454_at                         | At1g11190 | Bifunctional nuclease; BFN1                                          | 0.0020 | 0.0103 | -5.9  |
| 265572_at                         | At2g28210 | Carbonic anhydrase family protein                                    | 0.0042 | 0.0146 | -4.4  |
| 255300_at                         | At4g04870 | CDP-alcohol phosphatidyltransferase family protein                   | 0.0077 | 0.0193 | -2.9  |
| 248217_at                         | At5g53560 | Cytochrome B5 isoform 1                                              | 0.0043 | 0.0148 | -4.1  |
| 261011_at                         | At1g26340 | Cytochrome B5, putative                                              | 0.0309 | 0.0387 | -4.3  |
| 245044_at                         | At2g26500 | Cytochrome B6F complex subunit, putative                             | 0.0090 | 0.0207 | -3.8  |
| 247520_at                         | At5g61310 | Cytochrome C oxidase                                                 | 0.0214 | 0.0320 | -4.1  |
| 261317_at                         | At1g53030 | Cytochrome c oxidase copper chaperone family protein                 | 0.0058 | 0.0170 | -5.3  |
| 255011_at                         | At4g10040 | Cytochrome C, putative                                               | 0.0213 | 0.0319 | -3.3  |
| 264727_at                         | At1g22840 | Cytochrome C, putative                                               | 0.0046 | 0.0152 | -3.2  |
| 267626_at                         | At2g42250 | Cytochrome P450 family protein                                       | 0.0035 | 0.0136 | -14.1 |
| 256019_at                         | At1g58260 | Cytochrome P450 family protein                                       | 0.0043 | 0.0149 | -10.3 |
| 248964_at                         | At5g45340 | Cytochrome P450 family protein                                       | 0.0009 | 0.0073 | -4.8  |
| 261185_at                         | At1g34540 | Cytochrome P450 family protein                                       | 0.0047 | 0.0154 | -4.6  |
| 258973_at                         | At3g01900 | Cytochrome P450 family protein                                       | 0.0209 | 0.0317 | -3.8  |
| 257142_at                         | At3g20090 | Cytochrome P450 family protein                                       | 0.0281 | 0.0369 | -3.6  |
| 267505_at                         | At2g45560 | Cytochrome P450 family protein                                       | 0.0186 | 0.0299 | -2.6  |
| 249484_at                         | At5g38970 | Cytochrome P450, putative                                            | 0.0068 | 0.0181 | -17.9 |
| 261878_at                         | At1g50560 | Cytochrome P450, putative                                            | 0.0158 | 0.0276 | -5.9  |
| 259429_at                         | At1g01600 | Cytochrome P450, putative                                            | 0.0209 | 0.0316 | -4.2  |
| 257623_at                         | At3g26210 | Cytochrome P450, putative; CYP71B23                                  | 0.0288 | 0.0373 | -2.9  |
| 245548_at                         | At4g15310 | Cytochrome P450-related                                              | 0.0142 | 0.0262 | -10.1 |
| 246486_at                         | At5g15910 | Dehydrogenase-related                                                | 0.0143 | 0.0263 | -2.7  |
| 247409_at                         | At5g62980 | Dihydroneopterin aldolase, putative                                  | 0.0152 | 0.0271 | -2.6  |
| 250129_at                         | At5g16450 | Dimethylmenaquinone methyltransferase family protein                 | 0.0168 | 0.0283 | -3.7  |
| 247763_at                         | At5g59180 | DNA-directed RNA polymerase II                                       | 0.0053 | 0.0163 | -3.5  |
| 252041_at                         | At3g52090 | DNA-directed RNA polymerase II ; RPB13.6                             | 0.0034 | 0.0134 | -2.7  |
| 245367_at                         | At4g16265 | DNA-directed RNA polymerase II, putative                             | 0.0000 | 0.0016 | -4.4  |
| 264431_at                         | At1g61700 | DNA-directed RNA polymerase II, putative; RPB10                      | 0.0257 | 0.0353 | -4.8  |
| 263596_at                         | At2g01900 | Endonuclease/exonuclease/phosphatase family protein                  | 0.0111 | 0.0231 | -8.6  |
| 266011_at                         | At2g37440 | Endonuclease/exonuclease/phosphatase family protein                  | 0.0012 | 0.0084 | -6.2  |
| 250406_at                         | At5g10810 | Enhancer of rudimentary protein, putative                            | 0.0021 | 0.0106 | -4.3  |
| 266928_at                         | At2g45790 | Eukaryotic phosphomannomutase family protein                         | 0.0038 | 0.0141 | -2.8  |
| 256468_at                         | At1g32550 | Ferredoxin family protein                                            | 0.0056 | 0.0166 | -2.8  |
| 263624_at                         | At2g04700 | Ferredoxin thioredoxin reductase catalytic beta chain family protein | 0.0076 | 0.0191 | -3.2  |
| 251414_at                         | At3g60370 | FKBP-type peptidyl-prolyl cis-trans isomerase family protein         | 0.0128 | 0.0249 | -2.7  |
| 252853_at                         | At4g39710 | FKBP-type peptidyl-prolyl cis-trans isomerase, putative              | 0.0011 | 0.0081 | -2.9  |
| 260901_at                         | At1g21430 | Flavin-containing monooxygenase family protein                       | 0.0166 | 0.0282 | -11.4 |
| 256012_at                         | At1g19250 | Flavin-containing monooxygenase family protein                       | 0.0047 | 0.0154 | -8.6  |
| 265105_s_at                       | At1g63340 | Flavin-containing monooxygenase-related                              | 0.0026 | 0.0118 | -5.3  |
| 255420_at                         | At4g03240 | Fratxin protein-related                                              | 0.0051 | 0.0160 | -12.8 |
| 255865_at                         | At2g30330 | GCN5L1 family protein                                                | 0.0190 | 0.0301 | -3.7  |
| 267145_at                         | At2g38130 | GCN5-related N-acetyltransferase, putative                           | 0.0291 | 0.0374 | -2.6  |
| 250390_at                         | At5g11340 | GCN5-related N-acetyltransferase;GNAT family protein                 | 0.0023 | 0.0110 | -4.0  |

|             |           |                                                                                 |        |        |       |
|-------------|-----------|---------------------------------------------------------------------------------|--------|--------|-------|
| 246518_at   | At5g15770 | GCN5-related N-acetyltransferase:GNAT family protein                            | 0.0034 | 0.0133 | -3.3  |
| 262196_at   | At1g77870 | Geranyl Geranyl protein ATGP4                                                   | 0.0450 | 0.0474 | -2.6  |
| 266068_at   | At2g18640 | Geranylgeranyl pyrophosphate synthase, putative / GGPP synthetase, putative / f | 0.0370 | 0.0425 | -6.4  |
| 259445_at   | At1g02400 | Gibberellin 2-oxidase, putative / GA2-oxidase, putative                         | 0.0359 | 0.0419 | -4.8  |
| 261530_at   | At1g63460 | Glutathione peroxidase, putative                                                | 0.0410 | 0.0449 | -5.5  |
| 254890_at   | At4g11600 | Glutathione peroxidase, putative                                                | 0.0237 | 0.0338 | -3.7  |
| 263426_at   | At2g31570 | Glutathione peroxidase, putative                                                | 0.0422 | 0.0456 | -2.5  |
| 264993_at   | At1g67290 | Glyoxal oxidase-related                                                         | 0.0391 | 0.0438 | -4.8  |
| 247727_at   | At5g59490 | Haloacid dehalogenase-like hydrolase family protein                             | 0.0440 | 0.0468 | -5.4  |
| 252876_at   | At4g39970 | Haloacid dehalogenase-like hydrolase family protein                             | 0.0254 | 0.0351 | -2.7  |
| 267210_at   | At2g30920 | Hexaprenyldihydroxybenzoate methyltransferase                                   | 0.0023 | 0.0111 | -3.4  |
| 247314_at   | At5g64000 | Inositol polyphosphate 1-phosphatase, putative                                  | 0.0150 | 0.0270 | -2.7  |
| 258619_at   | At3g02780 | Isopentenyl diphosphate:dimethylallyl diphosphate isomerase II;IPP2             | 0.0001 | 0.0021 | -2.5  |
| 247931_at   | At5g57040 | Lactoylglutathione lyase family protein                                         | 0.0069 | 0.0182 | -2.6  |
| 246332_at   | At3g44830 | Lecithin:cholesterol acyltransferase family protein                             | 0.0153 | 0.0272 | -9.5  |
| 262755_at   | At1g16360 | Ligand-effect modulator 3 family protein; LEM3                                  | 0.0004 | 0.0051 | -15.9 |
| 257832_at   | At3g26740 | Light responsive protein-related                                                | 0.0167 | 0.0282 | -3.6  |
| 258100_at   | At3g23550 | MATE efflux family protein                                                      | 0.0004 | 0.0050 | -6.1  |
| 267046_at   | At2g34360 | MATE efflux family protein                                                      | 0.0337 | 0.0404 | -4.6  |
| 265151_at   | At1g51340 | MATE efflux family protein                                                      | 0.0067 | 0.0181 | -4.1  |
| 266126_at   | At2g45040 | Matrix metalloproteinase                                                        | 0.0226 | 0.0330 | -4.9  |
| 245345_at   | At4g16640 | Matrix metalloproteinase, putative                                              | 0.0491 | 0.0495 | -7.6  |
| 259247_at   | At3g07570 | Membrane protein, putative                                                      | 0.0000 | 0.0009 | -3.6  |
| 259926_at   | At1g75090 | Methyladenine glycosylase family protein                                        | 0.0019 | 0.0101 | -2.7  |
| 260669_at   | At1g19340 | Methyltransferase MT-A70 family protein                                         | 0.0368 | 0.0423 | -6.7  |
| 258941_at   | At3g09940 | Monodehydroascorbate reductase, putative                                        | 0.0009 | 0.0073 | -3.6  |
| 248405_at   | At5g51480 | Multi-copper oxidase type I family protein                                      | 0.0022 | 0.0107 | -8.7  |
| 265127_at   | At1g55560 | Multi-copper oxidase type I family protein                                      | 0.0151 | 0.0271 | -3.7  |
| 260849_at   | At1g21860 | Multi-copper oxidase type I family protein                                      | 0.0263 | 0.0356 | -3.1  |
| 248923_at   | At5g45940 | MutT/nudix family protein                                                       | 0.0446 | 0.0472 | -9.5  |
| 245777_at   | At1g73540 | MutT/nudix family protein                                                       | 0.0003 | 0.0044 | -6.5  |
| 257830_at   | At3g26690 | MutT/nudix family protein                                                       | 0.0010 | 0.0074 | -5.2  |
| 265872_at   | At2g01670 | MutT/nudix family protein                                                       | 0.0346 | 0.0410 | -5.1  |
| 248793_at   | At5g47240 | MutT/nudix family protein                                                       | 0.0181 | 0.0294 | -3.5  |
| 261212_at   | At1g12880 | MutT/nudix family protein                                                       | 0.0054 | 0.0164 | -3.2  |
| 254784_at   | At4g12720 | MutT/nudix family protein                                                       | 0.0014 | 0.0087 | -2.5  |
| 258870_at   | At3g03080 | NADP-dependent oxidoreductase, putative                                         | 0.0002 | 0.0038 | -14.4 |
| 249600_s_at | At5g38000 | NADP-dependent oxidoreductase, putative                                         | 0.0003 | 0.0043 | -3.7  |
| 246465_at   | At5g17000 | NADP-dependent oxidoreductase, putative                                         | 0.0314 | 0.0389 | -3.0  |
| 245820_at   | At1g26320 | NADP-dependent oxidoreductase, putative                                         | 0.0110 | 0.0230 | -2.8  |
| 261449_at   | At1g21120 | O-methyltransferase, putative                                                   | 0.0238 | 0.0339 | -2.8  |
| 256616_at   | At3g22260 | OTU-like cysteine protease family protein                                       | 0.0211 | 0.0318 | -3.0  |
| 266875_at   | At2g44800 | Oxidoreductase; 2OG-Fe:II oxygenase family protein                              | 0.0003 | 0.0043 | -7.7  |
| 264592_at   | At2g17720 | Oxidoreductase; 2OG-Fe:II oxygenase family protein                              | 0.0001 | 0.0019 | -2.9  |
| 246098_at   | At5g20400 | Oxidoreductase; 2OG-Fe:II oxygenase family protein                              | 0.0006 | 0.0063 | -2.5  |
| 255883_at   | At1g20270 | Oxidoreductase; 2OG-Fe:II oxygenase family protein                              | 0.0089 | 0.0207 | -2.5  |
| 255558_at   | At4g01900 | P II nitrogen sensing protein; GLB I                                            | 0.0016 | 0.0094 | -3.2  |
| 261554_at   | At1g63400 | Pentatricopeptide;PPR repeat-containing protein                                 | 0.0039 | 0.0144 | -45.7 |
| 266602_at   | At2g46050 | Pentatricopeptide;PPR repeat-containing protein                                 | 0.0095 | 0.0213 | -20.4 |
| 250166_at   | At5g15300 | Pentatricopeptide;PPR repeat-containing protein                                 | 0.0030 | 0.0126 | -17.4 |
| 250725_at   | At5g06400 | Pentatricopeptide;PPR repeat-containing protein                                 | 0.0080 | 0.0197 | -15.6 |
| 249222_at   | At5g42450 | Pentatricopeptide;PPR repeat-containing protein                                 | 0.0009 | 0.0073 | -14.7 |
| 259698_at   | At1g68930 | Pentatricopeptide;PPR repeat-containing protein                                 | 0.0005 | 0.0058 | -14.3 |
| 259798_at   | At1g64310 | Pentatricopeptide;PPR repeat-containing protein                                 | 0.0010 | 0.0075 | -4.7  |
| 253430_at   | At4g32430 | Pentatricopeptide;PPR repeat-containing protein                                 | 0.0042 | 0.0147 | -4.2  |
| 257979_at   | At3g20730 | Pentatricopeptide;PPR repeat-containing protein                                 | 0.0258 | 0.0353 | -4.2  |
| 253932_at   | At4g26800 | Pentatricopeptide;PPR repeat-containing protein                                 | 0.0357 | 0.0416 | -3.5  |
| 259295_at   | At3g05340 | Pentatricopeptide;PPR repeat-containing protein                                 | 0.0081 | 0.0198 | -2.8  |
| 264946_at   | At1g77010 | Pentatricopeptide;PPR repeat-containing protein                                 | 0.0277 | 0.0366 | -2.7  |
| 254288_at   | At4g22970 | Peptidase C50 family protein                                                    | 0.0269 | 0.0360 | -4.2  |
| 245190_at   | At1g67690 | Peptidase M3 family protein                                                     | 0.0000 | 0.0017 | -4.1  |
| 262154_at   | At1g52700 | Phospholipase/carboxylesterase family protein                                   | 0.0165 | 0.0282 | -15.6 |
| 259329_at   | At3g16360 | Phosphotransfer family protein                                                  | 0.0027 | 0.0120 | -2.7  |
| 248333_at   | At5g52390 | Photoassimilate-responsive protein, putative                                    | 0.0216 | 0.0322 | -7.8  |
| 247320_at   | At5g64040 | Photosystem I reaction center subunit PSI-N                                     | 0.0001 | 0.0027 | -2.9  |
| 257260_at   | At3g22104 | Phototropic-responsive NPH3 protein-related                                     | 0.0370 | 0.0424 | -3.7  |
| 253924_at   | At4g27110 | Phytochelatin synthetase-related                                                | 0.0216 | 0.0321 | -7.2  |
| 251026_at   | At5g02200 | Phytochrome A specific signal transduction component-related                    | 0.0091 | 0.0208 | -2.6  |



|                                                     |           |                                                                           |        |        |       |
|-----------------------------------------------------|-----------|---------------------------------------------------------------------------|--------|--------|-------|
| 266799_at                                           | At2g22860 | Phytosulfokines 2; PSK2                                                   | 0.0026 | 0.0118 | -4.9  |
| 247109_at                                           | At5g65870 | Phytosulfokines 5; PSK5                                                   | 0.0084 | 0.0200 | -4.9  |
| 252624_at                                           | At3g44735 | Phytosulfokines-related                                                   | 0.0010 | 0.0075 | -6.0  |
| 256158_at                                           | At1g13590 | Phytosulfokines-related                                                   | 0.0066 | 0.0179 | -3.4  |
| 261834_at                                           | At1g10640 | Polygalacturonase, putative                                               | 0.0166 | 0.0282 | -5.5  |
| 266147_at                                           | At2g12230 | Pseudogene; C-1-tetrahydrofolate synthase                                 | 0.0006 | 0.0063 | -7.8  |
| 246715_at                                           | At5g28230 | Pseudogene; similar to glucose-6-phosphate/phosphate-translocator         | 0.0045 | 0.0151 | -4.3  |
| 245866_s_at                                         | At1g57990 | Purine permease-related                                                   | 0.0285 | 0.0371 | -6.0  |
| 255587_at                                           | At4g01480 | Pyrophosphate phospho-hydrolase, putative                                 | 0.0022 | 0.0108 | -2.6  |
| 245626_at                                           | At1g56700 | Pyrrolidone-carboxylate peptidase family protein                          | 0.0161 | 0.0279 | -2.6  |
| 249933_at                                           | At5g22400 | Rac GTPase activating protein, putative                                   | 0.0304 | 0.0383 | -5.2  |
| 249085_at                                           | At5g44170 | Rapid response to Glucose protein 1                                       | 0.0464 | 0.0480 | -2.5  |
| 263328_at                                           | At2g15280 | Reticulon family protein; RTNLB10                                         | 0.0397 | 0.0441 | -2.8  |
| 265762_at                                           | At2g01240 | Reticulon family protein; RTNLB15                                         | 0.0285 | 0.0372 | -4.6  |
| 262329_at                                           | At1g64090 | Reticulon family protein; RTNLB3                                          | 0.0166 | 0.0282 | -2.5  |
| 253745_at                                           | At4g29090 | Reverse transcriptase, putative                                           | 0.0049 | 0.0157 | -4.9  |
| 265926_at                                           | At2g18600 | RUB1-conjugating enzyme, putative                                         | 0.0015 | 0.0091 | -2.9  |
| 246218_at                                           | At4g36800 | RUB1-conjugating enzyme, putative;RCE1                                    | 0.0288 | 0.0373 | -3.6  |
| 256290_at                                           | At3g12203 | Serine carboxypeptidase S10 family protein                                | 0.0150 | 0.0270 | -3.9  |
| 266755_at                                           | At2g47150 | Short-chain dehydrogenase/reductase; SDR family protein                   | 0.0303 | 0.0383 | -8.3  |
| 248520_at                                           | At5g50600 | Short-chain dehydrogenase/reductase; SDR family protein                   | 0.0162 | 0.0280 | -3.4  |
| 266265_at                                           | At2g29340 | Short-chain dehydrogenase/reductase; SDR family protein                   | 0.0395 | 0.0440 | -3.1  |
| 260050_at                                           | At1g29960 | Signal peptidase I family protein / MADS-box protein-related              | 0.0168 | 0.0283 | -10.1 |
| 262161_at                                           | At1g52600 | Signal peptidase, putative                                                | 0.0007 | 0.0068 | -3.3  |
| 266709_at                                           | At2g03120 | Signal peptide peptidase family protein                                   | 0.0246 | 0.0345 | -2.8  |
| 261799_at                                           | At1g30470 | SIT4 phosphatase-associated family protein                                | 0.0114 | 0.0234 | -3.2  |
| 266584_s_at                                         | At2g14920 | Sulfotransferase family protein                                           | 0.0096 | 0.0214 | -11.9 |
| 264595_at                                           | At1g04750 | Synaptobrevin family protein                                              | 0.0014 | 0.0089 | -3.2  |
| 245167_s_at                                         | At2g33120 | Synaptobrevin-related protein                                             | 0.0327 | 0.0398 | -4.2  |
| 261976_at                                           | At1g37063 | Transposase-related                                                       | 0.0148 | 0.0268 | -10.6 |
| 247639_s_at                                         | At5g60500 | UPP synthetase family protein                                             | 0.0339 | 0.0405 | -8.1  |
| 249685_at                                           | At5g36120 | YGGT family protein                                                       | 0.0038 | 0.0141 | -5.1  |
| 257522_at                                           | At3g08990 | Yippee family protein                                                     | 0.0083 | 0.0199 | -4.6  |
| 248187_at                                           | At5g53940 | Yippee family protein                                                     | 0.0132 | 0.0253 | -2.7  |
| E3. Glycolysis                                      |           |                                                                           |        |        |       |
| 252300_at                                           | At3g49160 | Pyruvate kinase family protein                                            | 0.0191 | 0.0302 | -3.0  |
| E4. Clathrin binding                                |           |                                                                           |        |        |       |
| 258710_s_at                                         | At3g09800 | Clathrin adaptor complex small chain family protein                       | 0.0035 | 0.0135 | -4.6  |
| 264847_at                                           | At2g17380 | Clathrin assembly protein AP19                                            | 0.0054 | 0.0164 | -4.3  |
| 261733_at                                           | At1g47830 | Clathrin coat assembly protein, putative                                  | 0.0211 | 0.0318 | -2.8  |
| E5. Intracellular membrane/membrane bound organelle |           |                                                                           |        |        |       |
| 264150_at                                           | At1g02090 | COP9 signalosome complex subunit 7ii / CSN complex subunit 7ii;CSN7;COP1  | 0.0058 | 0.0169 | -3.9  |
| 260418_s_at                                         | At1g69750 | Cox19 family protein                                                      | 0.0072 | 0.0186 | -3.5  |
| 258760_at                                           | At3g10780 | Emp24/gp25L/p24 family protein                                            | 0.0000 | 0.0010 | -4.6  |
| 259256_at                                           | At3g07680 | Emp24/gp25L/p24 family protein                                            | 0.0227 | 0.0331 | -2.9  |
| 258345_at                                           | At3g22845 | Emp24/gp25L/p24 family protein                                            | 0.0071 | 0.0185 | -4.6  |
| 257104_at                                           | At3g25040 | ER lumen protein retaining receptor, putative / HDEL receptor, putative   | 0.0230 | 0.0332 | -3.2  |
| 255816_at                                           | At2g33470 | Glycolipid transfer protein-related                                       | 0.0272 | 0.0362 | -3.6  |
| 263839_at                                           | At2g36900 | Golgi SNAP receptor complex member                                        | 0.0049 | 0.0157 | -2.5  |
| 248140_at                                           | At5g54980 | Integral membrane family protein                                          | 0.0041 | 0.0145 | -4.0  |
| 264505_at                                           | At1g09380 | Integral membrane family protein                                          | 0.0295 | 0.0378 | -3.5  |
| 259323_at                                           | At3g05280 | Integral membrane Yip1 family protein                                     | 0.0098 | 0.0217 | -3.2  |
| 253452_at                                           | At4g31930 | Mitochondrial glycoprotein family protein                                 | 0.0227 | 0.0331 | -2.7  |
| 267638_at                                           | At2g42210 | Mitochondrial import inner membrane translocase subunit Tim17/Tim22/Tim23 | 0.0041 | 0.0145 | -2.6  |
| 266239_at                                           | At2g29530 | Mitochondrial import inner membrane translocase;TIM10                     | 0.0030 | 0.0127 | -3.3  |
| 265006_at                                           | At1g61570 | Mitochondrial import inner membrane translocase;TIM13                     | 0.0056 | 0.0167 | -3.5  |
| 249268_at                                           | At5g41685 | Mitochondrial import receptor subunit TOM7                                | 0.0245 | 0.0343 | -4.0  |
| 266890_at                                           | At2g44620 | NADH-ubiquinone oxidoreductase                                            | 0.0063 | 0.0175 | -3.3  |
| 249959_at                                           | At5g18800 | NADH-ubiquinone oxidoreductase 19 kDa subunit;NDUFA8 family protein       | 0.0018 | 0.0098 | -4.6  |
| 258881_at                                           | At3g06310 | NADH-ubiquinone oxidoreductase 19 kDa subunit;NDUFA8 family protein       | 0.0028 | 0.0120 | -2.7  |
| 265219_at                                           | At2g02050 | NADH-ubiquinone oxidoreductase B18 subunit, putative                      | 0.0049 | 0.0156 | -2.7  |
| 248746_at                                           | At5g47890 | NADH-ubiquinone oxidoreductase B8 subunit, putative                       | 0.0022 | 0.0108 | -3.1  |
| 251186_at                                           | At3g62790 | NADH-ubiquinone oxidoreductase-related                                    | 0.0000 | 0.0004 | -3.0  |
| 258846_at                                           | At3g03070 | NADH-ubiquinone oxidoreductase-related                                    | 0.0271 | 0.0362 | -3.0  |
| 247011_at                                           | At5g67590 | NADH-ubiquinone oxidoreductase-related                                    | 0.0064 | 0.0177 | -2.9  |

|             |           |                                                                     |        |        |      |
|-------------|-----------|---------------------------------------------------------------------|--------|--------|------|
| 264923_s_at | At1g60740 | Peroxisiredoxin type 2, putative                                    | 0.0192 | 0.0303 | -2.6 |
| 261739_at   | At1g47750 | Peroxisomal biogenesis factor 11 family protein                     | 0.0203 | 0.0312 | -3.7 |
| 255338_at   | At4g04470 | Peroxisomal membrane protein; PMP22                                 | 0.0247 | 0.0345 | -3.2 |
| 248686_at   | At5g48540 | Secretory protein-related                                           | 0.0022 | 0.0108 | -3.7 |
| 256544_at   | At1g42560 | Seven transmembrane MLO family protein                              | 0.0003 | 0.0046 | -6.3 |
| 260869_at   | At1g43800 | Stearoyl-ACP desaturase, putative                                   | 0.0135 | 0.0256 | -7.4 |
| 249178_at   | At5g42890 | Sterol carrier protein 2;SCP-2 family protein                       | 0.0391 | 0.0438 | -4.4 |
| 254333_at   | At4g22753 | Sterol desaturase family protein                                    | 0.0043 | 0.0148 | -2.6 |
| 249343_at   | At5g40650 | Succinate dehydrogenase; iron-sulphur subunit; mitochondrial;SDH2-2 | 0.0002 | 0.0034 | -6.6 |
| 249373_at   | At5g40670 | Transmembrane family protein                                        | 0.0403 | 0.0445 | -3.1 |
| 253436_at   | At4g32470 | Ubiquinol-cytochrome C reductase, putative                          | 0.0328 | 0.0398 | -3.2 |
| 262206_at   | At2g01090 | Ubiquinol-cytochrome C reductase, putative                          | 0.0036 | 0.0138 | -3.2 |
| 248221_at   | At5g53530 | Vacuolar protein sorting-associated protein 26                      | 0.0086 | 0.0203 | -3.0 |
| 267412_at   | At2g34940 | Vacuolar sorting receptor, putative                                 | 0.0207 | 0.0315 | -3.0 |
| 258958_at   | At3g01390 | V-ATPase G subunit 1; VAG1                                          | 0.0009 | 0.0072 | -3.0 |
| 254216_at   | At4g23710 | V-ATPase G subunit 2; VAG2                                          | 0.0135 | 0.0256 | -3.6 |
| 256111_at   | At1g16820 | V-ATPase-related                                                    | 0.0489 | 0.0494 | -3.8 |

#### F. Proteins with binding function or cofactor requirement

|             |           |                                                                          |        |        |       |
|-------------|-----------|--------------------------------------------------------------------------|--------|--------|-------|
| 258971_at   | At3g01990 | ACT domain-containing protein:ACR6                                       | 0.0364 | 0.0421 | -2.8  |
| 246267_at   | At1g31812 | Acyl-CoA binding protein / ACBP                                          | 0.0040 | 0.0145 | -3.9  |
| 256838_at   | At3g22950 | ADP-ribosylation factor, putative                                        | 0.0083 | 0.0200 | -3.6  |
| 248346_at   | At5g52210 | ADP-ribosylation factor, putative                                        | 0.0000 | 0.0017 | -3.0  |
| 255927_at   | At1g12630 | AP2 domain-containing protein                                            | 0.0210 | 0.0317 | -3.4  |
| 260856_at   | At1g21910 | AP2 domain-containing transcription factor family protein                | 0.0162 | 0.0280 | -3.0  |
| 261101_at   | At1g63030 | AP2 domain-containing transcription factor, putative                     | 0.0203 | 0.0312 | -17.4 |
| 261984_at   | At1g33760 | AP2 domain-containing transcription factor, putative                     | 0.0022 | 0.0107 | -7.4  |
| 257581_s_at | At1g50680 | AP2 domain-containing transcription factor, putative                     | 0.0000 | 0.0019 | -3.1  |
| 255827_at   | At2g40600 | Appr-1-p processing enzyme family protein                                | 0.0000 | 0.0013 | -3.4  |
| 254788_at   | At4g12790 | ATP-binding family protein                                               | 0.0169 | 0.0284 | -2.7  |
| 252227_at   | At3g49900 | BTB/POZ domain-containing protein                                        | 0.0258 | 0.0353 | -4.6  |
| 253061_at   | At4g37610 | BTB/POZ domain-containing protein                                        | 0.0021 | 0.0105 | -8.3  |
| 251790_at   | At3g55470 | C2 domain-containing protein                                             | 0.0017 | 0.0098 | -4.8  |
| 259879_at   | At1g76650 | Calcium-binding EF hand family protein                                   | 0.0019 | 0.0101 | -6.6  |
| 253915_at   | At4g27280 | Calcium-binding EF hand family protein                                   | 0.0000 | 0.0004 | -4.8  |
| 249417_at   | At5g39670 | Calcium-binding EF hand family protein                                   | 0.0328 | 0.0398 | -4.2  |
| 257731_at   | At3g18430 | Calcium-binding EF hand family protein                                   | 0.0066 | 0.0179 | -3.5  |
| 267366_at   | At2g44310 | Calcium-binding EF hand family protein                                   | 0.0047 | 0.0154 | -3.2  |
| 262877_at   | At1g64850 | Calcium-binding EF hand family protein                                   | 0.0011 | 0.0078 | -3.0  |
| 263003_at   | At1g54450 | Calcium-binding EF-hand family protein                                   | 0.0012 | 0.0084 | -6.6  |
| 248164_at   | At5g54490 | Calcium-binding EF-hand protein, putative                                | 0.0004 | 0.0053 | -5.9  |
| 254782_at   | At4g12860 | Calcium-binding protein, putative                                        | 0.0027 | 0.0120 | -12.2 |
| 265460_at   | At2g46600 | Calcium-binding protein, putative                                        | 0.0039 | 0.0142 | -5.0  |
| 260076_at   | At1g73630 | Calcium-binding protein, putative                                        | 0.0122 | 0.0243 | -4.7  |
| 260881_at   | At1g21550 | Calcium-binding protein, putative                                        | 0.0054 | 0.0164 | -3.1  |
| 253282_at   | At4g34120 | CBS domain-containing protein                                            | 0.0414 | 0.0452 | -2.5  |
| 262261_at   | At1g70895 | CLE17, putative                                                          | 0.0343 | 0.0408 | -3.6  |
| 254859_at   | At4g12060 | Clp amino terminal domain-containing protein                             | 0.0092 | 0.0209 | -4.2  |
| 256621_at   | At3g24450 | Copper-binding family protein                                            | 0.0165 | 0.0281 | -13.1 |
| 263534_at   | At2g24940 | Cytochrome b5 domain-containing protein                                  | 0.0077 | 0.0192 | -4.1  |
| 264926_at   | At1g60660 | Cytochrome b5 domain-containing protein                                  | 0.0050 | 0.0158 | -2.7  |
| 249603_at   | At5g37210 | DC1 domain-containing protein                                            | 0.0001 | 0.0026 | -9.6  |
| 248182_at   | At5g54030 | DC1 domain-containing protein                                            | 0.0087 | 0.0204 | -8.3  |
| 259369_s_at | At1g69150 | DC1 domain-containing protein                                            | 0.0239 | 0.0339 | -7.1  |
| 258540_at   | At3g06990 | DC1 domain-containing protein                                            | 0.0163 | 0.0280 | -7.0  |
| 252582_at   | At3g45530 | DC1 domain-containing protein                                            | 0.0003 | 0.0042 | -5.6  |
| 267384_at   | At2g44370 | DC1 domain-containing protein                                            | 0.0299 | 0.0380 | -4.5  |
| 258541_at   | At3g07000 | DC1 domain-containing protein                                            | 0.0403 | 0.0445 | -4.3  |
| 267252_at   | At2g23100 | DC1 domain-containing protein                                            | 0.0187 | 0.0300 | -4.3  |
| 259454_at   | At1g44050 | DC1 domain-containing protein                                            | 0.0021 | 0.0105 | -3.4  |
| 260893_at   | At1g29180 | DC1 domain-containing protein                                            | 0.0328 | 0.0398 | -2.6  |
| 267385_at   | At2g44380 | DC1 domain-containing protein                                            | 0.0019 | 0.0101 | -2.5  |
| 247674_at   | At5g59930 | DC1 domain-containing protein / UV-B light-insensitive protein, putative | 0.0397 | 0.0441 | -4.3  |
| 259364_at   | At1g13260 | DNA-binding protein RAV1;RAV1                                            | 0.0004 | 0.0049 | -2.5  |
| 251302_at   | At3g61970 | DNA-binding protein, putative                                            | 0.0066 | 0.0179 | -3.3  |
| 248412_at   | At5g51590 | DNA-binding protein-related                                              | 0.0419 | 0.0454 | -5.5  |
| 253108_at   | At4g35900 | DNA-binding protein-related                                              | 0.0075 | 0.0190 | -3.1  |
| 247144_at   | At5g65590 | Dof-type zinc finger domain-containing protein                           | 0.0086 | 0.0202 | -6.2  |

|             |           |                                                                               |        |        |       |
|-------------|-----------|-------------------------------------------------------------------------------|--------|--------|-------|
| 254441_at   | At4g21050 | Dof-type zinc finger domain-containing protein                                | 0.0163 | 0.0280 | -5.6  |
| 262876_at   | At1g64750 | DSS1/SEM1 family protein                                                      | 0.0429 | 0.0461 | -3.7  |
| 248972_at   | At5g45010 | DSS1/SEM1 family protein                                                      | 0.0027 | 0.0120 | -3.4  |
| 261470_at   | At1g28370 | ERF domain protein 11;ERF11                                                   | 0.0500 | 0.0500 | -2.8  |
| 248799_at   | At5g47230 | Ethylene-responsive element-binding factor 5;ERF5                             | 0.0333 | 0.0401 | -3.0  |
| 256722_at   | At2g34050 | Eukaryotic putative RNA binding region RNP-1                                  | 0.0346 | 0.0410 | -5.7  |
| 262817_at   | At1g11770 | FAD-binding domain-containing protein                                         | 0.0072 | 0.0187 | -7.5  |
| 266711_at   | At2g46740 | FAD-binding domain-containing protein                                         | 0.0195 | 0.0305 | -4.8  |
| 245538_at   | At4g15200 | Formin homology 2 domain-containing protein                                   | 0.0273 | 0.0363 | -10.5 |
| 246034_at   | At5g08350 | GRAM domain-containing protein / ABA-responsive protein-related               | 0.0072 | 0.0186 | -2.6  |
| 256224_at   | At1g56330 | GTP-binding protein;SAR1B                                                     | 0.0420 | 0.0455 | -2.5  |
| 250866_at   | At5g03905 | HesB-like domain-containing protein                                           | 0.0164 | 0.0281 | -5.2  |
| 263256_at   | At1g10500 | HesB-like domain-containing protein                                           | 0.0072 | 0.0187 | -3.4  |
| 258791_at   | At3g04720 | Hevein-like protein; HEL                                                      | 0.0005 | 0.0055 | -4.1  |
| 247344_at   | At5g63750 | IBR domain-containing protein                                                 | 0.0211 | 0.0318 | -3.4  |
| 267049_at   | At2g34210 | KOW domain-containing transcription factor family protein                     | 0.0324 | 0.0396 | -11.4 |
| 259056_at   | At3g03420 | Ku70-binding family protein                                                   | 0.0423 | 0.0457 | -2.7  |
| 245087_at   | At2g39830 | LIM domain-containing protein                                                 | 0.0030 | 0.0127 | -2.7  |
| 255907_at   | At1g17920 | Lipid-binding START domain-containing protein                                 | 0.0273 | 0.0363 | -3.0  |
| 254330_at   | At4g22700 | LOB domain family protein / lateral organ boundaries domain family protein;LB | 0.0008 | 0.0071 | -15.0 |
| 260265_at   | At1g68510 | LOB domain protein 42 / lateral organ boundaries domain protein 42;LBD42      | 0.0431 | 0.0463 | -3.0  |
| 264152_at   | At1g02140 | Mago nashi family protein                                                     | 0.0111 | 0.0231 | -2.9  |
| 249814_at   | At5g23840 | MD-2-related lipid recognition domain-containing protein / ML domain-containi | 0.0355 | 0.0415 | -13.9 |
| 251576_at   | At3g58200 | Meprin and TRAF homology domain-containing protein                            | 0.0031 | 0.0128 | -8.8  |
| 246855_at   | At5g26280 | Meprin and TRAF homology domain-containing protein                            | 0.0091 | 0.0208 | -4.5  |
| 248354_at   | At5g52330 | Meprin and TRAF homology domain-containing protein                            | 0.0279 | 0.0368 | -2.7  |
| 254387_at   | At4g21850 | Methionine sulfoxide reductase domain-containing protein                      | 0.0013 | 0.0085 | -7.0  |
| 254385_s_at | At4g21830 | Methionine sulfoxide reductase domain-containing protein                      | 0.0058 | 0.0170 | -3.2  |
| 255298_at   | At4g04840 | Methionine sulfoxide reductase domain-containing protein                      | 0.0340 | 0.0406 | -2.8  |
| 249138_at   | At5g43070 | MFP1 attachment factor, putative                                              | 0.0013 | 0.0086 | -13.0 |
| 246757_at   | At5g27940 | MFP1 attachment factor, putative                                              | 0.0213 | 0.0319 | -3.2  |
| 247979_at   | At5g56750 | Ndr family protein                                                            | 0.0046 | 0.0153 | -3.3  |
| 248963_at   | At5g45700 | NLI interacting factor;NIF family protein                                     | 0.0239 | 0.0340 | -10.9 |
| 251511_at   | At3g59180 | Novel domain with similarity to F-Box domain                                  | 0.0170 | 0.0285 | -5.3  |
| 267371_at   | At2g44510 | p21Cip1-binding protein-related                                               | 0.0054 | 0.0164 | -3.9  |
| 255307_at   | At4g04900 | p21-rho-binding domain-containing protein                                     | 0.0490 | 0.0495 | -5.2  |
| 257397_at   | At2g20430 | p21-rho-binding domain-containing protein                                     | 0.0009 | 0.0071 | -2.5  |
| 246895_at   | At5g25540 | PAM2 PABC INTERACTING DOMAIN                                                  | 0.0259 | 0.0354 | -2.6  |
| 263703_at   | At1g31170 | parB-like nuclease domain-containing protein                                  | 0.0151 | 0.0271 | -2.6  |
| 250110_at   | At5g15350 | Plastocyanin-like domain-containing protein                                   | 0.0265 | 0.0357 | -3.6  |
| 247888_at   | At5g57920 | Plastocyanin-like domain-containing protein                                   | 0.0035 | 0.0135 | -2.7  |
| 246099_at   | At5g20230 | Plastocyanin-like domain-containing protein                                   | 0.0475 | 0.0486 | -2.6  |
| 265987_at   | At2g24240 | Potassium channel tetramerisation domain-containing protein                   | 0.0108 | 0.0228 | -6.7  |
| 260080_at   | At1g78160 | Pumilio/Puf RNA-binding domain-containing protein                             | 0.0000 | 0.0006 | -40.4 |
| 248022_at   | At5g56510 | Pumilio/Puf RNA-binding domain-containing protein                             | 0.0030 | 0.0127 | -8.1  |
| 252825_at   | At4g39890 | Ras-related GTP-binding family protein                                        | 0.0056 | 0.0167 | -5.1  |
| 248726_at   | At5g47960 | Ras-related GTP-binding family protein                                        | 0.0013 | 0.0086 | -4.2  |
| 254641_at   | At4g18800 | Ras-related GTP-binding family protein                                        | 0.0002 | 0.0032 | -4.0  |
| 263876_at   | At2g21880 | Ras-related GTP-binding protein, putative                                     | 0.0064 | 0.0177 | -13.6 |
| 245299_at   | At4g17530 | Ras-related GTP-binding protein, putative                                     | 0.0455 | 0.0477 | -2.8  |
| 263398_at   | At2g31680 | Ras-related GTP-binding protein, putative                                     | 0.0238 | 0.0339 | -2.6  |
| 259611_at   | At1g52280 | Ras-related GTP-binding protein, putative                                     | 0.0270 | 0.0361 | -2.5  |
| 250923_at   | At5g03455 | Rhodanese-like domain-containing protein                                      | 0.0422 | 0.0456 | -2.8  |
| 257909_at   | At3g25480 | Rhodanese-like domain-containing protein                                      | 0.0461 | 0.0479 | -2.8  |
| 252767_at   | At3g42830 | Ring-box protein Roc1/Rbx1/Hrt1, putative                                     | 0.0084 | 0.0201 | -6.4  |
| 246089_at   | At5g20570 | Ring-box protein-related                                                      | 0.0126 | 0.0247 | -2.7  |
| 252559_at   | At3g46020 | RNA-binding protein, putative                                                 | 0.0247 | 0.0345 | -6.2  |
| 246527_at   | At5g15750 | RNA-binding S4 domain-containing protein                                      | 0.0026 | 0.0118 | -3.0  |
| 264868_at   | At1g24090 | RNase H domain-containing protein                                             | 0.0016 | 0.0094 | -8.6  |
| 263181_at   | At1g05720 | Selenoprotein family protein                                                  | 0.0085 | 0.0202 | -3.6  |
| 266020_at   | At2g05900 | SET domain-containing protein                                                 | 0.0170 | 0.0285 | -4.1  |
| 248607_at   | At5g49480 | Sodium-responsive calcium-binding protein; ACPI                               | 0.0124 | 0.0246 | -5.4  |
| 266097_at   | At2g37970 | SOUL heme-binding family protein                                              | 0.0047 | 0.0154 | -2.9  |
| 252370_at   | At3g48600 | SWIB complex BAF60b domain-containing protein                                 | 0.0009 | 0.0071 | -8.4  |
| 259649_at   | At1g55300 | TATA-binding protein-associated factor TAFII55 family protein                 | 0.0215 | 0.0321 | -4.8  |
| 262374_s_at | At1g72930 | Toll-Interleukin-Resistance;TIR domain-containing protein                     | 0.0026 | 0.0119 | -3.9  |
| 265782_at   | At2g07440 | Two-component responsive regulator-related                                    | 0.0189 | 0.0301 | -3.2  |
| 256522_at   | At1g66160 | U-box domain-containing protein                                               | 0.0126 | 0.0247 | -4.5  |

|           |           |                                       |        |        |       |
|-----------|-----------|---------------------------------------|--------|--------|-------|
| 257748_at | At3g18710 | U-box domain-containing protein       | 0.0038 | 0.0141 | -3.0  |
| 258105_at | At3g23605 | UBX domain-containing protein         | 0.0253 | 0.0350 | -2.5  |
| 266800_at | At2g22880 | VQ motif-containing protein           | 0.0056 | 0.0167 | -28.4 |
| 259552_at | At1g21320 | VQ motif-containing protein           | 0.0026 | 0.0118 | -13.6 |
| 251617_at | At3g58000 | VQ motif-containing protein           | 0.0058 | 0.0169 | -8.4  |
| 260261_at | At1g68450 | VQ motif-containing protein           | 0.0159 | 0.0277 | -6.1  |
| 260804_at | At1g78410 | VQ motif-containing protein           | 0.0229 | 0.0332 | -4.0  |
| 247230_at | At5g65170 | VQ motif-containing protein           | 0.0406 | 0.0447 | -2.7  |
| 248868_at | At5g46780 | VQ motif-containing protein           | 0.0109 | 0.0229 | -2.6  |
| 245814_at | At1g49910 | WD-40 repeat family protein, putative | 0.0032 | 0.0130 | -14.0 |
| 248870_at | At5g46710 | Zinc-binding family protein           | 0.0000 | 0.0012 | -3.6  |

#### Fl. Metal ion binding/metal binding

|           |           |                                                  |        |        |       |
|-----------|-----------|--------------------------------------------------|--------|--------|-------|
| 248322_at | At5g52760 | Heavy-metal-associated domain-containing protein | 0.0013 | 0.0085 | -13.7 |
| 248327_at | At5g52750 | Heavy-metal-associated domain-containing protein | 0.0014 | 0.0089 | -10.1 |
| 245829_at | At1g57780 | Heavy-metal-associated domain-containing protein | 0.0150 | 0.0270 | -9.9  |
| 248715_at | At5g48290 | Heavy-metal-associated domain-containing protein | 0.0382 | 0.0433 | -8.7  |
| 248321_at | At5g52740 | Heavy-metal-associated domain-containing protein | 0.0154 | 0.0273 | -7.7  |
| 255254_at | At4g05030 | Heavy-metal-associated domain-containing protein | 0.0138 | 0.0258 | -2.7  |
| 246548_at | At5g14910 | Heavy-metal-associated domain-containing protein | 0.0192 | 0.0303 | -2.6  |
| 259753_at | At1g71050 | Heavy-metal-associated domain-containing protein | 0.0003 | 0.0048 | -3.7  |
| 257054_at | At3g15353 | Metallothionein protein, putative                | 0.0021 | 0.0105 | -5.5  |
| 261438_at | At1g07600 | Metallothionein-like protein 1A                  | 0.0005 | 0.0056 | -2.9  |
| 261410_at | At1g07610 | Metallothionein-like protein 1C                  | 0.0025 | 0.0115 | -3.4  |

#### G. Protein synthesis and translation

|             |           |                                                                                      |        |        |       |
|-------------|-----------|--------------------------------------------------------------------------------------|--------|--------|-------|
| 255977_at   | At1g34030 | 40S ribosomal protein S18;RPS18B                                                     | 0.0131 | 0.0252 | -2.5  |
| 255000_at   | At4g09800 | 40S ribosomal protein S18;RPS18C                                                     | 0.0066 | 0.0179 | -3.7  |
| 246730_at   | At5g28060 | 40S ribosomal protein S24;RPS24B                                                     | 0.0069 | 0.0182 | -3.7  |
| 266705_at   | At2g19750 | 40S ribosomal protein S30;RPS30A                                                     | 0.0249 | 0.0346 | -2.8  |
| 253715_at   | At4g29390 | 40S ribosomal protein S30;RPS30B                                                     | 0.0019 | 0.0101 | -4.2  |
| 247968_at   | At5g56670 | 40S ribosomal protein S30;RPS30C                                                     | 0.0003 | 0.0042 | -9.2  |
| 247010_at   | At5g67510 | 60S ribosomal protein L26;RPL26B                                                     | 0.0072 | 0.0186 | -3.0  |
| 265730_at   | At2g32220 | 60S ribosomal protein L27;RPL27A                                                     | 0.0004 | 0.0053 | -7.6  |
| 256794_at   | At3g22230 | 60S ribosomal protein L27;RPL27B                                                     | 0.0131 | 0.0252 | -3.6  |
| 266699_at   | At2g19730 | 60S ribosomal protein L28;RPL28A                                                     | 0.0237 | 0.0338 | -2.8  |
| 258532_at   | At3g06700 | 60S ribosomal protein L29;RPL29A                                                     | 0.0001 | 0.0027 | -3.8  |
| 258521_at   | At3g06680 | 60S ribosomal protein L29;RPL29B                                                     | 0.0058 | 0.0169 | -3.4  |
| 254012_at   | At4g26230 | 60S ribosomal protein L31;RPL31B                                                     | 0.0011 | 0.0079 | -2.8  |
| 258709_at   | At3g09500 | 60S ribosomal protein L35;RPL35A                                                     | 0.0034 | 0.0135 | -3.6  |
| 266980_at   | At2g39390 | 60S ribosomal protein L35;RPL35B                                                     | 0.0013 | 0.0087 | -2.6  |
| 251007_at   | At5g02610 | 60S ribosomal protein L35;RPL35D                                                     | 0.0384 | 0.0434 | -2.9  |
| 251926_at   | At3g53740 | 60S ribosomal protein L36;RPL36B                                                     | 0.0297 | 0.0379 | -2.5  |
| 251018_at   | At5g02450 | 60S ribosomal protein L36;RPL36C                                                     | 0.0051 | 0.0160 | -3.9  |
| 258296_at   | At3g23390 | 60S ribosomal protein L36a/L44;RPL36aA                                               | 0.0186 | 0.0299 | -3.8  |
| 245311_at   | At4g14320 | 60S ribosomal protein L36a/L44;RPL36aB                                               | 0.0030 | 0.0127 | -3.5  |
| 259612_at   | At1g52300 | 60S ribosomal protein L37;RPL37B                                                     | 0.0001 | 0.0026 | -2.9  |
| 263810_at   | At2g04520 | Eukaryotic translation initiation factor 1A, putative / eIF-1A, putative / eIF-4C, p | 0.0069 | 0.0182 | -3.0  |
| 249711_at   | At5g35680 | Eukaryotic translation initiation factor 1A, putative / eIF-1A, putative / eIF-4C, p | 0.0186 | 0.0299 | -2.6  |
| 266245_at   | At2g27700 | Eukaryotic translation initiation factor 2 family protein / eIF-2 family protein     | 0.0258 | 0.0353 | -14.4 |
| 260350_at   | At1g69410 | Eukaryotic translation initiation factor 5A, putative / eIF-5A, putative             | 0.0189 | 0.0301 | -3.1  |
| 248146_at   | At5g54940 | Eukaryotic translation initiation factor SUI1, putative                              | 0.0055 | 0.0165 | -4.1  |
| 248126_at   | At5g54760 | Eukaryotic translation initiation factor SUI1, putative                              | 0.0133 | 0.0254 | -2.7  |
| 262283_at   | At1g68590 | Plastid-specific 30S ribosomal protein 3, putative                                   | 0.0323 | 0.0395 | -3.6  |
| 248878_at   | At5g46160 | Ribosomal protein L14 family protein                                                 | 0.0013 | 0.0084 | -3.9  |
| 261418_at   | At1g07830 | Ribosomal protein L29 family protein                                                 | 0.0162 | 0.0280 | -2.6  |
| 249975_s_at | At5g18790 | Ribosomal protein L33 family protein                                                 | 0.0158 | 0.0276 | -2.8  |
| 265338_at   | At2g18400 | Ribosomal protein L6 family protein                                                  | 0.0036 | 0.0137 | -3.0  |
| 254831_at   | At4g12600 | Ribosomal protein L7 family protein                                                  | 0.0005 | 0.0055 | -7.2  |
| 254355_at   | At4g22380 | Ribosomal protein L7 family protein                                                  | 0.0027 | 0.0120 | -3.2  |
| 264364_at   | At1g03330 | Small nuclear ribonucleoprotein D, putative                                          | 0.0009 | 0.0071 | -4.5  |
| 266482_at   | At2g47640 | Small nuclear ribonucleoprotein D2, putative                                         | 0.0067 | 0.0181 | -2.8  |
| 266579_at   | At2g23930 | Small nuclear ribonucleoprotein G, putative                                          | 0.0044 | 0.0150 | -4.3  |
| 259288_at   | At3g11500 | Small nuclear ribonucleoprotein G, putative                                          | 0.0203 | 0.0312 | -3.3  |
| 248678_at   | At5g48870 | Small nuclear ribonucleoprotein, putative                                            | 0.0017 | 0.0097 | -3.6  |

#### H. Protein fate

|           |           |                                              |        |        |      |
|-----------|-----------|----------------------------------------------|--------|--------|------|
| 247789_at | At5g58680 | Armadillo/beta-catenin repeat family protein | 0.0006 | 0.0058 | -3.0 |
|-----------|-----------|----------------------------------------------|--------|--------|------|

|             |           |                                                |        |        |       |
|-------------|-----------|------------------------------------------------|--------|--------|-------|
| 254792_at   | At4g12920 | Aspartyl protease family protein               | 0.0321 | 0.0394 | -8.9  |
| 255590_at   | At4g01610 | Cathepsin B-like cysteine protease, putative   | 0.0162 | 0.0280 | -2.9  |
| 245323_at   | At4g16500 | Cysteine protease inhibitor family protein     | 0.0032 | 0.0131 | -3.0  |
| 250316_at   | At5g12140 | Cysteine protease inhibitor, putative          | 0.0253 | 0.0350 | -5.0  |
| 245096_at   | At2g40880 | Cysteine protease inhibitor, putative          | 0.0009 | 0.0071 | -4.9  |
| 256714_at   | At2g34080 | Cysteine proteinase, putative                  | 0.0297 | 0.0379 | -4.6  |
| 249363_at   | At5g40560 | DegP protease, putative                        | 0.0090 | 0.0207 | -10.8 |
| 257437_s_at | At2g16290 | F-box family protein                           | 0.0000 | 0.0017 | -16.7 |
| 252299_at   | At3g49150 | F-box family protein                           | 0.0228 | 0.0332 | -14.6 |
| 248456_at   | At5g51380 | F-box family protein                           | 0.0004 | 0.0052 | -10.7 |
| 255445_at   | At4g02740 | F-box family protein                           | 0.0247 | 0.0345 | -8.9  |
| 266675_s_at | At2g29610 | F-box family protein                           | 0.0253 | 0.0350 | -6.4  |
| 263283_at   | At2g36090 | F-box family protein                           | 0.0368 | 0.0423 | -5.5  |
| 245653_at   | At4g13985 | F-box family protein                           | 0.0402 | 0.0444 | -4.1  |
| 265632_at   | At2g14290 | F-box family protein                           | 0.0076 | 0.0191 | -3.8  |
| 257537_at   | At3g22350 | F-box family protein                           | 0.0229 | 0.0332 | -3.3  |
| 264758_at   | At1g61340 | F-box family protein                           | 0.0301 | 0.0381 | -3.2  |
| 256432_at   | At3g10990 | F-box family protein                           | 0.0271 | 0.0362 | -2.8  |
| 260310_at   | At1g70590 | F-box family protein                           | 0.0112 | 0.0233 | -2.6  |
| 265620_at   | At2g27310 | F-box family protein                           | 0.0018 | 0.0098 | -2.6  |
| 265140_at   | At1g51320 | F-box family protein;FBX11                     | 0.0025 | 0.0115 | -8.1  |
| 252455_at   | At3g47140 | F-box family protein-related                   | 0.0426 | 0.0459 | -5.6  |
| 259795_at   | At1g64290 | F-box protein-related                          | 0.0298 | 0.0380 | -5.4  |
| 258606_at   | At3g02840 | Immediate-early fungal elicitor family protein | 0.0011 | 0.0081 | -6.3  |
| 246709_s_at | At5g28160 | Kelch repeat-containing F-box family protein   | 0.0062 | 0.0174 | -19.4 |
| 254212_at   | At4g23580 | Kelch repeat-containing F-box family protein   | 0.0004 | 0.0049 | -8.6  |
| 256750_at   | At3g27150 | Kelch repeat-containing F-box family protein   | 0.0260 | 0.0355 | -2.7  |
| 254567_s_at | At4g19260 | Kelch repeat-containing protein                | 0.0004 | 0.0052 | -6.1  |
| 255101_at   | At4g08670 | Protease inhibitor                             | 0.0154 | 0.0273 | -15.9 |
| 248062_at   | At5g55450 | Protease inhibitor                             | 0.0010 | 0.0078 | -13.9 |
| 254805_at   | At4g12480 | Protease inhibitor                             | 0.0448 | 0.0473 | -6.7  |
| 245322_at   | At4g14815 | Protease inhibitor                             | 0.0000 | 0.0012 | -6.4  |
| 250764_at   | At5g05960 | Protease inhibitor                             | 0.0156 | 0.0275 | -4.6  |
| 248683_at   | At5g48490 | Protease inhibitor                             | 0.0133 | 0.0254 | -4.0  |
| 263195_at   | At1g36150 | Protease inhibitor                             | 0.0177 | 0.0291 | -3.7  |
| 247462_at   | At5g62080 | Protease inhibitor                             | 0.0109 | 0.0228 | -3.6  |
| 248684_at   | At5g48485 | Protease inhibitor                             | 0.0133 | 0.0254 | -3.0  |
| 252090_at   | At3g52130 | Protease inhibitor                             | 0.0240 | 0.0340 | -2.5  |
| 249101_at   | At5g43580 | Protease inhibitor, putative                   | 0.0005 | 0.0056 | -45.7 |
| 266168_at   | At2g38870 | Protease inhibitor, putative                   | 0.0020 | 0.0105 | -3.9  |
| 247721_at   | At5g59140 | SKP1 family protein                            | 0.0279 | 0.0368 | -4.5  |
| 266178_at   | At2g02280 | SKP1 INTERACTING PARTNER 3                     | 0.0004 | 0.0050 | -3.2  |
| 250345_at   | At5g11940 | Subtilase family protein                       | 0.0000 | 0.0014 | -6.9  |
| 247799_at   | At5g58840 | Subtilase family protein                       | 0.0065 | 0.0178 | -4.9  |
| 255904_at   | At1g17860 | Trypsin and protease inhibitor family protein  | 0.0259 | 0.0354 | -7.9  |
| 260101_at   | At1g73260 | Trypsin and protease inhibitor family protein  | 0.0238 | 0.0339 | -5.9  |
| 261235_x_at | At1g32840 | Ulp1 protease family protein                   | 0.0018 | 0.0099 | -18.7 |
| 261287_at   | At1g37020 | Ulp1 protease family protein                   | 0.0082 | 0.0199 | -13.1 |
| 255217_s_at | At4g07680 | Ulp1 protease family                           | 0.0054 | 0.0164 | -2.5  |

#### H1. Ubiquitin like conjugating enzyme activity

|             |           |                                                    |        |        |       |
|-------------|-----------|----------------------------------------------------|--------|--------|-------|
| 257943_at   | At3g21840 | E3 ubiquitin ligase SCF complex subunit; SKP1/ASK1 | 0.0031 | 0.0128 | -3.2  |
| 257942_at   | At3g21830 | E3 ubiquitin ligase SCF complex subunit; SKP1/ASK2 | 0.0131 | 0.0252 | -12.8 |
| 248103_at   | At5g55160 | Small ubiquitin-like modifier 2; SUMO              | 0.0004 | 0.0051 | -4.6  |
| 257453_at   | At1g65130 | Ubiquitin carboxyl-terminal -related               | 0.0407 | 0.0448 | -5.1  |
| 252056_at   | At3g52590 | Ubiquitin extension protein 1; UBQ1                | 0.0167 | 0.0283 | -3.0  |
| 263289_at   | At2g36170 | Ubiquitin extension protein 2; UBQ2                | 0.0145 | 0.0265 | -3.5  |
| 255464_s_at | At4g02970 | Ubiquitin family protein                           | 0.0366 | 0.0422 | -5.0  |
| 254106_at   | At4g24990 | Ubiquitin family protein                           | 0.0220 | 0.0324 | -3.8  |
| 266626_at   | At2g35360 | Ubiquitin family protein                           | 0.0218 | 0.0323 | -3.4  |
| 257785_at   | At3g26980 | Ubiquitin family protein                           | 0.0264 | 0.0356 | -3.3  |
| 255951_at   | At1g22050 | Ubiquitin family protein                           | 0.0068 | 0.0181 | -3.2  |
| 249217_at   | At5g42300 | Ubiquitin family protein                           | 0.0007 | 0.0064 | -2.9  |
| 265357_at   | At2g16740 | Ubiquitin-conjugating enzyme, putative             | 0.0296 | 0.0379 | -2.6  |
| 260964_at   | At1g45050 | Ubiquitin-conjugating enzyme 15;UBC15              | 0.0035 | 0.0135 | -3.3  |
| 261110_at   | At1g75440 | Ubiquitin-conjugating enzyme 16;UBC16              | 0.0400 | 0.0443 | -4.0  |
| 249299_at   | At5g41340 | Ubiquitin-conjugating enzyme 4;UBC4                | 0.0027 | 0.0119 | -2.7  |
| 266604_at   | At2g46030 | Ubiquitin-conjugating enzyme 6;UBC6                | 0.0297 | 0.0379 | -3.3  |

|             |           |                                             |        |        |      |
|-------------|-----------|---------------------------------------------|--------|--------|------|
| 260180_at   | At1g70660 | Ubiquitin-conjugating enzyme family protein | 0.0068 | 0.0181 | -2.8 |
| 253826_s_at | At4g27960 | Ubiquitin-conjugating enzyme; UBC9          | 0.0044 | 0.0150 | -2.8 |

#### I. Transcription/splicing/RNA processing

|             |           |                                                                     |        |        |       |
|-------------|-----------|---------------------------------------------------------------------|--------|--------|-------|
| 256363_at   | At1g66510 | AAR2 protein family                                                 | 0.0026 | 0.0118 | -4.7  |
| 266454_at   | At2g22750 | Basic helix-loop-helix; bHLH family protein                         | 0.0188 | 0.0300 | -8.4  |
| 260070_at   | At1g73830 | Basic helix-loop-helix; bHLH family protein                         | 0.0021 | 0.0105 | -7.6  |
| 261717_at   | At1g18400 | Basic helix-loop-helix; bHLH family protein                         | 0.0031 | 0.0128 | -3.9  |
| 259898_at   | At1g71200 | Basic helix-loop-helix; bHLH family protein                         | 0.0176 | 0.0290 | -3.6  |
| 248839_at   | At5g46690 | Basic helix-loop-helix; bHLH family protein                         | 0.0149 | 0.0269 | -2.9  |
| 261941_at   | At1g22490 | Basic helix-loop-helix; bHLH family protein                         | 0.0234 | 0.0336 | -2.7  |
| 256395_at   | At3g06120 | Basic helix-loop-helix; bHLH family protein                         | 0.0367 | 0.0423 | -2.6  |
| 245331_at   | At4g14410 | Basic helix-loop-helix; bHLH family protein                         | 0.0034 | 0.0134 | -2.5  |
| 246212_at   | At4g36930 | Basic helix-loop-helix; bHLH protein                                | 0.0088 | 0.0205 | -7.0  |
| 250155_at   | At5g15160 | BHLH family protein                                                 | 0.0300 | 0.0381 | -10.2 |
| 249383_at   | At5g39860 | BHLH family protein                                                 | 0.0061 | 0.0173 | -6.5  |
| 248606_at   | At5g49450 | bZIP family transcription factor                                    | 0.0000 | 0.0006 | -4.9  |
| 265756_at   | At2g13150 | bZIP family transcription factor                                    | 0.0024 | 0.0112 | -9.8  |
| 249534_at   | At5g38800 | bZIP transcription factor family protein                            | 0.0046 | 0.0152 | -8.5  |
| 263064_at   | At2g18160 | bZIP transcription factor family protein                            | 0.0234 | 0.0336 | -4.8  |
| 263647_at   | At2g04690 | Cellular repressor of E1A-stimulated genes; CREG family             | 0.0020 | 0.0104 | -4.6  |
| 267588_at   | At2g42060 | CHP-rich zinc finger protein, putative                              | 0.0074 | 0.0188 | -3.6  |
| 255618_at   | At4g01340 | CHP-rich zinc finger protein-related                                | 0.0006 | 0.0058 | -18.5 |
| 251551_at   | At3g58680 | Ethylene-responsive transcriptional coactivator, putative           | 0.0447 | 0.0472 | -2.9  |
| 247767_at   | At5g58890 | MADS-box family protein                                             | 0.0094 | 0.0212 | -8.6  |
| 250476_at   | At5g10140 | MADS-box protein flowering locus F;FLF                              | 0.0016 | 0.0094 | -15.0 |
| 251312_at   | At3g61120 | MADS-box protein;AGL13                                              | 0.0241 | 0.0340 | -2.9  |
| 254896_at   | At4g11880 | MADS-box protein;AGL14                                              | 0.0009 | 0.0072 | -17.6 |
| 267403_at   | At2g26320 | MADS-box protein;AGL33                                              | 0.0013 | 0.0086 | -24.9 |
| 247469_at   | At5g62165 | MADS-box protein;AGL42                                              | 0.0000 | 0.0009 | -16.3 |
| 267528_at   | At2g45650 | MADS-box protein;AGL6                                               | 0.0187 | 0.0300 | -6.0  |
| 263295_at   | At2g14210 | MADS-box protein;ANR1                                               | 0.0046 | 0.0152 | -2.9  |
| 260281_at   | At1g80500 | MBP-1 Interacting protein 2A                                        | 0.0040 | 0.0144 | -2.7  |
| 257163_at   | At3g24310 | Myb family transcription factor                                     | 0.0472 | 0.0485 | -10.3 |
| 263549_at   | At2g21650 | Myb family transcription factor                                     | 0.0205 | 0.0314 | -9.6  |
| 249820_at   | At5g23650 | Myb family transcription factor                                     | 0.0017 | 0.0098 | -4.4  |
| 255037_at   | At4g09460 | Myb family transcription factor                                     | 0.0391 | 0.0438 | -2.7  |
| 251223_at   | At3g62610 | Myb family transcription factor                                     | 0.0058 | 0.0169 | -2.6  |
| 263615_at   | At2g25230 | Myb family transcription factor; Myb100                             | 0.0340 | 0.0406 | -7.1  |
| 267087_at   | At2g32460 | Myb family transcription factor; Myb101                             | 0.0002 | 0.0034 | -16.2 |
| 266469_at   | At2g31180 | Myb family transcription factor; Myb14                              | 0.0073 | 0.0188 | -3.5  |
| 257919_at   | At3g23250 | Myb family transcription factor; Myb15                              | 0.0005 | 0.0057 | -3.9  |
| 259822_at   | At1g66230 | Myb family transcription factor; Myb20                              | 0.0272 | 0.0363 | -5.1  |
| 251974_at   | At3g53200 | Myb family transcription factor; Myb27                              | 0.0035 | 0.0135 | -3.4  |
| 258237_at   | At3g27810 | Myb family transcription factor; Myb3                               | 0.0052 | 0.0162 | -11.8 |
| 250051_at   | At5g17800 | Myb family transcription factor; Myb56                              | 0.0006 | 0.0058 | -3.6  |
| 256155_at   | At3g08500 | Myb family transcription factor; Myb83                              | 0.0131 | 0.0252 | -4.3  |
| 248246_at   | At5g53200 | Myb family transcription factor; TRIPTYCHON                         | 0.0273 | 0.0363 | -3.5  |
| 247772_at   | At5g58610 | PHD finger transcription factor, putative                           | 0.0050 | 0.0158 | -4.1  |
| 250410_at   | At5g11010 | Pre-mRNA cleavage complex-related                                   | 0.0186 | 0.0299 | -3.2  |
| 245942_at   | At5g19490 | Repressor protein-related                                           | 0.0000 | 0.0014 | -3.1  |
| 265641_at   | At2g27330 | RNA recognition motif;RRM-containing protein                        | 0.0031 | 0.0128 | -12.9 |
| 259409_at   | At1g13330 | TBP-1 INTERACTING PROTEIN                                           | 0.0001 | 0.0022 | -2.9  |
| 264671_at   | At1g09920 | TRAF-type zinc finger-related                                       | 0.0135 | 0.0256 | -2.8  |
| 249246_at   | At5g42290 | Transcription activator-related                                     | 0.0450 | 0.0474 | -5.9  |
| 258079_at   | At3g25940 | Transcription factor S-II; TFIIIS                                   | 0.0443 | 0.0470 | -10.1 |
| 250932_s_at | At5g03220 | Transcriptional co-activator-related                                | 0.0193 | 0.0303 | -3.4  |
| 253375_at   | At4g33280 | Transcriptional factor B3 family protein                            | 0.0060 | 0.0172 | -8.7  |
| 250026_at   | At5g18090 | Transcriptional factor B3 family protein                            | 0.0327 | 0.0398 | -7.8  |
| 250071_at   | At5g18000 | Transcriptional factor B3 family protein                            | 0.0037 | 0.0139 | -7.2  |
| 261260_at   | At1g26680 | Transcriptional factor B3 family protein                            | 0.0392 | 0.0438 | -3.6  |
| 254910_at   | At4g11175 | Translation initiation factor IF-1, putative                        | 0.0037 | 0.0139 | -3.8  |
| 253514_at   | At4g31805 | WRKY family transcription factor                                    | 0.0155 | 0.0274 | -4.5  |
| 254231_at   | At4g23810 | WRKY family transcription factor                                    | 0.0028 | 0.0120 | -3.6  |
| 267469_at   | At2g30590 | WRKY family transcription factor                                    | 0.0313 | 0.0389 | -2.8  |
| 259320_at   | At3g01080 | WRKY family transcription factor                                    | 0.0368 | 0.0423 | -2.5  |
| 265333_at   | At2g18350 | Zinc finger homeobox family protein / ZF-HD homeobox family protein | 0.0132 | 0.0253 | -3.0  |
| 265485_at   | At2g15550 | Zinc finger protein                                                 | 0.0265 | 0.0357 | -8.4  |

|                                                      |           |                                                             |        |        |       |
|------------------------------------------------------|-----------|-------------------------------------------------------------|--------|--------|-------|
| 254423_at                                            | At4g21610 | Zinc finger protein, putative                               | 0.0043 | 0.0148 | -2.6  |
| 258230_s_at                                          | At3g27710 | Zinc finger protein-related                                 | 0.0168 | 0.0283 | -11.7 |
| 265607_at                                            | At2g25370 | Zinc finger protein-related                                 | 0.0118 | 0.0238 | -4.5  |
| 254861_at                                            | At4g12040 | Zinc finger; AN1-like family protein                        | 0.0287 | 0.0372 | -4.1  |
| 256231_at                                            | At3g12630 | Zinc finger; AN1-like family protein                        | 0.0185 | 0.0298 | -3.3  |
| 256576_at                                            | At3g28210 | Zinc finger; AN1-like family protein                        | 0.0021 | 0.0106 | -2.8  |
| 263537_at                                            | At2g24790 | Zinc finger; B-box type family protein                      | 0.0038 | 0.0141 | -2.8  |
| 257262_at                                            | At3g21890 | Zinc finger; B-box type family protein                      | 0.0317 | 0.0391 | -2.7  |
| 248160_at                                            | At5g54470 | Zinc finger; B-box type family protein                      | 0.0255 | 0.0352 | -2.5  |
| 252567_at                                            | At3g46070 | Zinc finger; C2H2 type family protein                       | 0.0072 | 0.0186 | -14.9 |
| 253187_at                                            | At4g35280 | Zinc finger; C2H2 type family protein                       | 0.0360 | 0.0419 | -5.5  |
| 249370_at                                            | At5g40710 | Zinc finger; C2H2 type family protein                       | 0.0117 | 0.0237 | -4.7  |
| 250396_at                                            | At5g10970 | Zinc finger; C2H2 type family protein                       | 0.0110 | 0.0230 | -4.3  |
| 265081_at                                            | At1g03840 | Zinc finger; C2H2 type family protein                       | 0.0109 | 0.0229 | -3.6  |
| 247655_at                                            | At5g59820 | Zinc finger; C2H2 type family protein; ZAT12                | 0.0310 | 0.0387 | -3.3  |
| 251634_at                                            | At3g57480 | Zinc finger; C2H2 type; AN1-like family protein             | 0.0244 | 0.0343 | -3.3  |
| 256356_s_at                                          | At1g66500 | Zinc finger; C2H2-type family protein                       | 0.0020 | 0.0104 | -5.8  |
| 252704_at                                            | At3g43750 | Zinc finger; C3HC4-type RING finger family protein          | 0.0001 | 0.0031 | -23.2 |
| 261265_at                                            | At1g26800 | Zinc finger; C3HC4-type RING finger family protein          | 0.0407 | 0.0448 | -13.7 |
| 267417_at                                            | At2g34990 | Zinc finger; C3HC4-type RING finger family protein          | 0.0338 | 0.0405 | -11.0 |
| 257656_at                                            | At3g13228 | Zinc finger; C3HC4-type RING finger family protein          | 0.0239 | 0.0340 | -6.7  |
| 265852_at                                            | At2g42350 | Zinc finger; C3HC4-type RING finger family protein          | 0.0002 | 0.0032 | -6.0  |
| 258261_at                                            | At3g15740 | Zinc finger; C3HC4-type RING finger family protein          | 0.0021 | 0.0105 | -5.4  |
| 247595_at                                            | At5g60820 | Zinc finger; C3HC4-type RING finger family protein          | 0.0002 | 0.0038 | -4.6  |
| 261481_at                                            | At1g14260 | Zinc finger; C3HC4-type RING finger family protein          | 0.0001 | 0.0020 | -4.3  |
| 252474_at                                            | At3g46620 | Zinc finger; C3HC4-type RING finger family protein          | 0.0073 | 0.0187 | -4.0  |
| 262167_at                                            | At1g74990 | Zinc finger; C3HC4-type RING finger family protein          | 0.0391 | 0.0438 | -3.7  |
| 255511_at                                            | At4g02075 | Zinc finger; C3HC4-type RING finger family protein          | 0.0011 | 0.0078 | -3.3  |
| 260008_at                                            | At1g68070 | Zinc finger; C3HC4-type RING finger family protein          | 0.0072 | 0.0187 | -3.0  |
| 249862_at                                            | At5g22920 | Zinc finger; C3HC4-type RING finger family protein          | 0.0032 | 0.0131 | -2.9  |
| 262252_at                                            | At1g53820 | Zinc finger; C3HC4-type RING finger family protein          | 0.0208 | 0.0316 | -2.8  |
| 265853_at                                            | At2g42360 | Zinc finger; C3HC4-type RING finger family protein          | 0.0042 | 0.0147 | -2.7  |
| 245329_at                                            | At4g14365 | Zinc finger; C3HC4-type RING finger family protein          | 0.0441 | 0.0469 | -3.0  |
| 258529_at                                            | At3g06740 | Zinc finger; GATA type family protein                       | 0.0467 | 0.0482 | -3.1  |
| 258630_at                                            | At3g02820 | Zinc knuckle; CCHC-type family protein                      | 0.0062 | 0.0173 | -3.5  |
| II. Helicase activity                                |           |                                                             |        |        |       |
| 262553_at                                            | At1g31360 | Helicase, putative; RECQ12                                  | 0.0443 | 0.0470 | -4.2  |
| I2. RNA metabolism                                   |           |                                                             |        |        |       |
| 249976_at                                            | At5g18810 | SC35-like splicing factor; 28 kD;SCL28                      | 0.0057 | 0.0169 | -4.0  |
| 262927_at                                            | At1g65810 | tRNA-splicing endonuclease positive effector-related        | 0.0174 | 0.0288 | -4.7  |
| J. Transporters                                      |           |                                                             |        |        |       |
| 256672_at                                            | At3g52310 | ABC transporter family protein                              | 0.0198 | 0.0308 | -18.2 |
| 255855_at                                            | At1g66950 | ABC transporter family protein                              | 0.0006 | 0.0063 | -11.3 |
| 247613_at                                            | At5g60740 | ABC transporter family protein                              | 0.0263 | 0.0356 | -6.1  |
| 266107_at                                            | At2g37910 | Cation/hydrogen exchanger, putative; CHX21                  | 0.0085 | 0.0201 | -3.0  |
| 249883_at                                            | At5g22900 | Cation/hydrogen exchanger, putative; CHX3                   | 0.0005 | 0.0058 | -4.7  |
| 260623_at                                            | At1g08090 | High-affinity nitrate transporter; ACH1                     | 0.0478 | 0.0488 | -5.1  |
| 250487_at                                            | At5g09690 | Magnesium transporter CorA-like family protein; MRS2-7      | 0.0000 | 0.0008 | -11.5 |
| 247207_at                                            | At5g65000 | Nucleotide-sugar transporter family protein                 | 0.0038 | 0.0140 | -3.7  |
| 251752_at                                            | At3g55740 | Proline transporter 2; ProT2                                | 0.0472 | 0.0485 | -3.5  |
| 254083_at                                            | At4g24920 | Protein transport protein SEC61 gamma subunit, putative     | 0.0000 | 0.0015 | -7.7  |
| 252328_at                                            | At3g48570 | Protein transport protein SEC61 gamma subunit, putative     | 0.0210 | 0.0317 | -3.5  |
| 260400_at                                            | At1g69860 | Proton-dependent oligopeptide transport; POT family protein | 0.0057 | 0.0168 | -13.7 |
| 252538_at                                            | At3g45720 | Proton-dependent oligopeptide transport; POT family protein | 0.0485 | 0.0493 | -9.1  |
| 252537_at                                            | At3g45710 | Proton-dependent oligopeptide transport; POT family protein | 0.0407 | 0.0448 | -4.2  |
| 250378_at                                            | At5g11570 | Proton-dependent oligopeptide transport; POT family protein | 0.0356 | 0.0416 | -3.1  |
| 247415_at                                            | At5g63060 | SEC14 cytosolic factor, putative                            | 0.0010 | 0.0076 | -3.3  |
| 246887_at                                            | At5g26250 | Sugar transporter, putative                                 | 0.0349 | 0.0412 | -7.7  |
| 248127_at                                            | At5g54750 | Transport protein particle;TRAPP component Bet3, putative   | 0.0455 | 0.0477 | -2.7  |
| 264373_at                                            | At1g11890 | Vesicle transport protein SEC22, putative                   | 0.0246 | 0.0345 | -2.9  |
| K. Transposable elements, viral and plasmid proteins |           |                                                             |        |        |       |
| 265755_at                                            | At2g10630 | CACTA-like transposase family;En/Spm                        | 0.0325 | 0.0397 | -5.7  |
| 263051_s_at                                          | At2g04210 | CACTA-like transposase family;Ptta/En/Spm                   | 0.0018 | 0.0098 | -6.3  |
| 246648_at                                            | At5g35140 | CACTA-like transposase family;Ptta/En/Spm                   | 0.0193 | 0.0303 | -5.6  |

|             |           |                                            |        |        |       |
|-------------|-----------|--------------------------------------------|--------|--------|-------|
| 265754_x_at | At2g10640 | CACTA-like transposase family;PttA/En/Spm  | 0.0038 | 0.0142 | -3.0  |
| 255313_at   | At4g04590 | CACTA-like transposase family;Tnp2/En/Spm  | 0.0141 | 0.0261 | -11.2 |
| 262008_s_at | At1g35590 | CACTA-like transposase family;Tnp2/En/Spm  | 0.0057 | 0.0168 | -7.5  |
| 265890_s_at | At2g14980 | CACTA-like transposase family;Tnp2/En/Spm  | 0.0196 | 0.0306 | -7.5  |
| 259459_at   | At1g44070 | CACTA-like transposase family;Tnp2/En/Spm  | 0.0428 | 0.0460 | -6.2  |
| 254947_at   | At4g10990 | Copia-like retrotransposon family          | 0.0202 | 0.0311 | -18.6 |
| 265241_at   | At2g07693 | Copia-like retrotransposon family          | 0.0051 | 0.0160 | -12.1 |
| 261184_at   | At1g34545 | Copia-like retrotransposon family          | 0.0220 | 0.0324 | -8.2  |
| 255323_at   | At4g04280 | Copia-like retrotransposon family          | 0.0159 | 0.0277 | -6.8  |
| 255463_at   | At4g02960 | Copia-like retrotransposon family          | 0.0476 | 0.0487 | -5.1  |
| 265971_at   | At2g11220 | Copia-like retrotransposon family          | 0.0296 | 0.0379 | -4.9  |
| 261997_at   | At1g33817 | Copia-like retrotransposon family          | 0.0212 | 0.0319 | -4.8  |
| 256032_at   | At1g34090 | Copia-like retrotransposon family          | 0.0001 | 0.0023 | -4.6  |
| 257347_at   | At3g29792 | Copia-like retrotransposon family          | 0.0078 | 0.0193 | -3.7  |
| 254973_at   | At4g10460 | Copia-like retrotransposon family          | 0.0164 | 0.0280 | -3.6  |
| 265299_at   | At2g13940 | Copia-like retrotransposon family          | 0.0324 | 0.0396 | -3.1  |
| 263746_at   | At2g21460 | Copia-like retrotransposon family          | 0.0052 | 0.0161 | -2.9  |
| 246604_at   | At5g35310 | Copia-like retrotransposon family          | 0.0190 | 0.0301 | -2.8  |
| 264074_at   | At2g10780 | Gypsy-like retrotransposon family          | 0.0154 | 0.0273 | -15.5 |
| 263965_at   | At2g12870 | Gypsy-like retrotransposon family          | 0.0096 | 0.0214 | -13.2 |
| 265525_at   | At2g06170 | Gypsy-like retrotransposon family          | 0.0310 | 0.0387 | -8.5  |
| 265361_at   | At2g13230 | Gypsy-like retrotransposon family          | 0.0195 | 0.0305 | -7.4  |
| 255209_at   | At4g07590 | Gypsy-like retrotransposon family          | 0.0475 | 0.0487 | -4.4  |
| 265565_at   | At2g05610 | Gypsy-like retrotransposon family          | 0.0019 | 0.0102 | -2.7  |
| 263991_at   | At2g13020 | Gypsy-like retrotransposon family; Athila  | 0.0002 | 0.0035 | -20.9 |
| 255156_at   | At4g07780 | Gypsy-like retrotransposon family; Athila  | 0.0313 | 0.0388 | -11.3 |
| 252794_at   | At3g42260 | Gypsy-like retrotransposon family; Athila  | 0.0064 | 0.0177 | -4.1  |
| 263187_at   | At1g36130 | Gypsy-like retrotransposon family; Athila  | 0.0396 | 0.0441 | -3.7  |
| 265303_at   | At2g14040 | Gypsy-like retrotransposon family; Athila  | 0.0015 | 0.0090 | -2.8  |
| 252725_at   | At3g43050 | Mutator-like transposase family            | 0.0006 | 0.0060 | -29.6 |
| 251435_at   | At3g59860 | Mutator-like transposase family            | 0.0012 | 0.0082 | -7.9  |
| 261730_s_at | At1g47816 | Mutator-like transposase family            | 0.0029 | 0.0125 | -7.8  |
| 255058_s_at | At4g09410 | Mutator-like transposase family            | 0.0415 | 0.0452 | -3.8  |
| 263770_at   | At2g06410 | Mutator-like transposase family            | 0.0360 | 0.0419 | -3.5  |
| 255154_at   | At4g08220 | Mutator-like transposase family            | 0.0012 | 0.0081 | -3.4  |
| 255476_at   | At4g02490 | Non-LTR retrotransposon family; LINE       | 0.0139 | 0.0259 | -5.0  |
| 246678_at   | At5g33200 | PREDICTED REPLICATION A1 PROTEINS          | 0.0014 | 0.0088 | -9.7  |
| 265695_at   | At2g24490 | Replication protein, putative              | 0.0052 | 0.0161 | -2.6  |
| 249654_at   | At5g37090 | Replication protein-related                | 0.0000 | 0.0006 | -22.4 |
| 255188_at   | At4g07340 | Replication protein-related                | 0.0339 | 0.0405 | -13.7 |
| 266116_at   | At2g02180 | Tobamovirus multiplication protein 3; TOM3 | 0.0107 | 0.0226 | -3.2  |

#### L. Unknown proteins

|           |           |                   |        |        |       |
|-----------|-----------|-------------------|--------|--------|-------|
| 250152_at | At5g15120 | Expressed protein | 0.0001 | 0.0028 | -31.1 |
| 249896_at | At5g22530 | Expressed protein | 0.0021 | 0.0105 | -28.6 |
| 258391_at | At3g15420 | Expressed protein | 0.0123 | 0.0245 | -27.2 |
| 250881_at | At5g04080 | Expressed protein | 0.0003 | 0.0042 | -26.9 |
| 260668_at | At1g19530 | Expressed protein | 0.0079 | 0.0195 | -26.9 |
| 266502_at | At2g47720 | Expressed protein | 0.0027 | 0.0120 | -23.2 |
| 260389_at | At1g74055 | Expressed protein | 0.0176 | 0.0290 | -20.4 |
| 259120_at | At3g02240 | Expressed protein | 0.0289 | 0.0374 | -19.5 |
| 247375_at | At5g63135 | Expressed protein | 0.0003 | 0.0041 | -17.8 |
| 256135_at | At1g48730 | Expressed protein | 0.0002 | 0.0035 | -17.6 |
| 265327_at | At2g18210 | Expressed protein | 0.0042 | 0.0147 | -16.8 |
| 257724_at | At3g18510 | Expressed protein | 0.0005 | 0.0057 | -16.3 |
| 252946_at | At4g39235 | Expressed protein | 0.0144 | 0.0264 | -16.0 |
| 257402_at | At1g23570 | Expressed protein | 0.0125 | 0.0246 | -14.4 |
| 251345_at | At3g60940 | Expressed protein | 0.0040 | 0.0145 | -14.0 |
| 248774_at | At5g47830 | Expressed protein | 0.0399 | 0.0442 | -13.8 |
| 263102_at | At2g05270 | Expressed protein | 0.0335 | 0.0402 | -13.8 |
| 263182_at | At1g05575 | Expressed protein | 0.0015 | 0.0092 | -13.2 |
| 256283_at | At3g12540 | Expressed protein | 0.0035 | 0.0135 | -12.9 |
| 264958_at | At1g76960 | Expressed protein | 0.0431 | 0.0462 | -12.5 |
| 252218_at | At3g50150 | Expressed protein | 0.0322 | 0.0394 | -12.5 |
| 257542_at | At3g26050 | Expressed protein | 0.0097 | 0.0215 | -12.1 |
| 265518_at | At2g06040 | Expressed protein | 0.0143 | 0.0263 | -12.0 |
| 247146_at | At5g65610 | Expressed protein | 0.0040 | 0.0145 | -11.7 |
| 252882_at | At4g39675 | Expressed protein | 0.0005 | 0.0057 | -11.3 |



|             |           |                   |        |        |       |
|-------------|-----------|-------------------|--------|--------|-------|
| 251114_at   | At5g01380 | Expressed protein | 0.0100 | 0.0218 | -11.2 |
| 246270_at   | At4g36500 | Expressed protein | 0.0103 | 0.0222 | -11.2 |
| 265164_at   | At1g23600 | Expressed protein | 0.0024 | 0.0114 | -11.2 |
| 267332_at   | At2g19290 | Expressed protein | 0.0009 | 0.0072 | -11.0 |
| 245906_at   | At5g11070 | Expressed protein | 0.0008 | 0.0070 | -10.8 |
| 262602_at   | At1g15270 | Expressed protein | 0.0020 | 0.0103 | -10.8 |
| 249756_at   | At5g24313 | Expressed protein | 0.0263 | 0.0356 | -10.3 |
| 248509_at   | At5g50335 | Expressed protein | 0.0479 | 0.0489 | -10.2 |
| 247431_at   | At5g62520 | Expressed protein | 0.0118 | 0.0238 | -10.2 |
| 257716_at   | At3g18300 | Expressed protein | 0.0000 | 0.0001 | -10.0 |
| 255955_at   | At1g22030 | Expressed protein | 0.0489 | 0.0494 | -10.0 |
| 261461_at   | At1g07860 | Expressed protein | 0.0037 | 0.0138 | -9.9  |
| 267133_at   | At2g23440 | Expressed protein | 0.0006 | 0.0062 | -9.7  |
| 267321_at   | At2g19320 | Expressed protein | 0.0417 | 0.0453 | -9.5  |
| 249861_at   | At5g22875 | Expressed protein | 0.0366 | 0.0422 | -9.2  |
| 253117_at   | At4g35905 | Expressed protein | 0.0105 | 0.0224 | -8.8  |
| 253168_at   | At4g35070 | Expressed protein | 0.0468 | 0.0483 | -8.8  |
| 265231_s_at | At2g07713 | Expressed protein | 0.0220 | 0.0324 | -8.6  |
| 252524_at   | At3g46430 | Expressed protein | 0.0021 | 0.0106 | -8.4  |
| 260038_at   | At1g68875 | Expressed protein | 0.0284 | 0.0371 | -8.3  |
| 260744_at   | At1g15010 | Expressed protein | 0.0189 | 0.0301 | -8.3  |
| 258370_at   | At3g14395 | Expressed protein | 0.0091 | 0.0208 | -8.3  |
| 257134_at   | At3g12870 | Expressed protein | 0.0190 | 0.0301 | -8.2  |
| 264488_s_at | At1g27330 | Expressed protein | 0.0003 | 0.0047 | -8.1  |
| 250076_at   | At5g16660 | Expressed protein | 0.0009 | 0.0073 | -8.0  |
| 247070_at   | At5g66815 | Expressed protein | 0.0028 | 0.0123 | -7.9  |
| 248430_at   | At5g51800 | Expressed protein | 0.0308 | 0.0386 | -7.9  |
| 263674_at   | At2g04790 | Expressed protein | 0.0020 | 0.0105 | -7.8  |
| 263524_x_at | At2g24920 | Expressed protein | 0.0278 | 0.0367 | -7.8  |
| 249288_at   | At5g41050 | Expressed protein | 0.0399 | 0.0442 | -7.7  |
| 263369_at   | At2g20480 | Expressed protein | 0.0456 | 0.0478 | -7.6  |
| 253086_at   | At4g36370 | Expressed protein | 0.0124 | 0.0245 | -7.6  |
| 257579_at   | At3g11000 | Expressed protein | 0.0485 | 0.0493 | -7.5  |
| 256159_at   | At1g30135 | Expressed protein | 0.0054 | 0.0164 | -7.4  |
| 266472_at   | At2g31150 | Expressed protein | 0.0487 | 0.0494 | -7.4  |
| 267345_at   | At2g44240 | Expressed protein | 0.0003 | 0.0043 | -7.3  |
| 260437_at   | At1g68380 | Expressed protein | 0.0302 | 0.0382 | -7.3  |
| 259479_at   | At1g19020 | Expressed protein | 0.0016 | 0.0093 | -7.2  |
| 265820_at   | At2g17940 | Expressed protein | 0.0497 | 0.0499 | -7.0  |
| 255960_at   | At1g22140 | Expressed protein | 0.0040 | 0.0145 | -6.9  |
| 250882_at   | At5g04000 | Expressed protein | 0.0363 | 0.0421 | -6.9  |
| 256499_at   | At1g36640 | Expressed protein | 0.0061 | 0.0173 | -6.9  |
| 256796_at   | At3g22210 | Expressed protein | 0.0000 | 0.0004 | -6.8  |
| 247922_at   | At5g57500 | Expressed protein | 0.0095 | 0.0213 | -6.8  |
| 249943_at   | At5g22280 | Expressed protein | 0.0068 | 0.0181 | -6.7  |
| 259325_at   | At3g05320 | Expressed protein | 0.0004 | 0.0048 | -6.4  |
| 264297_at   | At1g78710 | Expressed protein | 0.0121 | 0.0242 | -6.3  |
| 255978_at   | At1g34010 | Expressed protein | 0.0006 | 0.0061 | -6.2  |
| 257540_at   | At3g21520 | Expressed protein | 0.0458 | 0.0479 | -6.1  |
| 255243_at   | At4g05590 | Expressed protein | 0.0040 | 0.0145 | -6.1  |
| 263812_at   | At2g09960 | Expressed protein | 0.0252 | 0.0349 | -6.1  |
| 257793_at   | At3g26960 | Expressed protein | 0.0154 | 0.0273 | -6.1  |
| 254257_s_at | At4g23350 | Expressed protein | 0.0182 | 0.0295 | -6.0  |
| 255285_at   | At4g04630 | Expressed protein | 0.0243 | 0.0342 | -5.9  |
| 265837_at   | At2g14560 | Expressed protein | 0.0000 | 0.0017 | -5.9  |
| 245333_at   | At4g14615 | Expressed protein | 0.0023 | 0.0110 | -5.8  |
| 263396_at   | At2g31710 | Expressed protein | 0.0009 | 0.0071 | -5.8  |
| 249379_at   | At5g40460 | Expressed protein | 0.0116 | 0.0236 | -5.8  |
| 254037_at   | At4g25760 | Expressed protein | 0.0207 | 0.0315 | -5.7  |
| 260895_at   | At1g29250 | Expressed protein | 0.0059 | 0.0170 | -5.7  |
| 260012_at   | At1g67865 | Expressed protein | 0.0009 | 0.0073 | -5.7  |
| 267261_at   | At2g23120 | Expressed protein | 0.0020 | 0.0104 | -5.6  |
| 247143_at   | At5g65580 | Expressed protein | 0.0150 | 0.0270 | -5.6  |
| 265025_at   | At1g24575 | Expressed protein | 0.0356 | 0.0416 | -5.6  |
| 260656_at   | At1g19380 | Expressed protein | 0.0064 | 0.0177 | -5.6  |
| 257609_at   | At3g13845 | Expressed protein | 0.0073 | 0.0188 | -5.6  |
| 252908_at   | At4g39670 | Expressed protein | 0.0103 | 0.0222 | -5.6  |
| 257956_at   | At3g25400 | Expressed protein | 0.0015 | 0.0091 | -5.5  |

|             |           |                   |        |        |      |
|-------------|-----------|-------------------|--------|--------|------|
| 253044_at   | At4g37290 | Expressed protein | 0.0007 | 0.0068 | -5.5 |
| 252419_at   | At3g47510 | Expressed protein | 0.0113 | 0.0233 | -5.5 |
| 256047_at   | At1g07060 | Expressed protein | 0.0285 | 0.0372 | -5.5 |
| 258262_at   | At3g15770 | Expressed protein | 0.0001 | 0.0022 | -5.5 |
| 253917_at   | At4g27380 | Expressed protein | 0.0467 | 0.0483 | -5.4 |
| 249021_at   | At5g44820 | Expressed protein | 0.0003 | 0.0042 | -5.3 |
| 252165_at   | At3g50550 | Expressed protein | 0.0002 | 0.0034 | -5.3 |
| 246018_at   | At5g10695 | Expressed protein | 0.0231 | 0.0334 | -5.3 |
| 264933_at   | At1g61160 | Expressed protein | 0.0423 | 0.0457 | -5.2 |
| 262853_at   | At1g20890 | Expressed protein | 0.0348 | 0.0411 | -5.2 |
| 260946_at   | At1g06010 | Expressed protein | 0.0247 | 0.0345 | -5.2 |
| 249578_at   | At5g37730 | Expressed protein | 0.0365 | 0.0422 | -5.2 |
| 252612_at   | At3g45160 | Expressed protein | 0.0161 | 0.0279 | -5.1 |
| 259675_at   | At1g77710 | Expressed protein | 0.0041 | 0.0146 | -5.1 |
| 260754_at   | At1g49000 | Expressed protein | 0.0025 | 0.0117 | -5.0 |
| 258362_at   | At3g14280 | Expressed protein | 0.0168 | 0.0283 | -5.0 |
| 259979_at   | At1g76600 | Expressed protein | 0.0323 | 0.0395 | -5.0 |
| 262236_at   | At1g48330 | Expressed protein | 0.0335 | 0.0402 | -5.0 |
| 260005_at   | At1g67920 | Expressed protein | 0.0010 | 0.0076 | -5.0 |
| 259271_at   | At3g01170 | Expressed protein | 0.0006 | 0.0061 | -5.0 |
| 249941_at   | At5g22270 | Expressed protein | 0.0008 | 0.0070 | -5.0 |
| 264830_at   | At1g03710 | Expressed protein | 0.0185 | 0.0298 | -4.9 |
| 262373_at   | At1g73120 | Expressed protein | 0.0389 | 0.0437 | -4.9 |
| 245840_at   | At1g58420 | Expressed protein | 0.0170 | 0.0285 | -4.9 |
| 247305_at   | At5g63905 | Expressed protein | 0.0009 | 0.0073 | -4.9 |
| 248133_at   | At5g54850 | Expressed protein | 0.0064 | 0.0177 | -4.9 |
| 262832_s_at | At1g14870 | Expressed protein | 0.0077 | 0.0193 | -4.9 |
| 266901_at   | At2g34600 | Expressed protein | 0.0209 | 0.0316 | -4.8 |
| 259497_at   | At1g15860 | Expressed protein | 0.0062 | 0.0174 | -4.8 |
| 262286_at   | At1g68585 | Expressed protein | 0.0299 | 0.0380 | -4.8 |
| 259889_at   | At1g76405 | Expressed protein | 0.0068 | 0.0181 | -4.8 |
| 250301_at   | At5g11970 | Expressed protein | 0.0046 | 0.0152 | -4.8 |
| 259894_at   | At1g71430 | Expressed protein | 0.0349 | 0.0412 | -4.7 |
| 259841_at   | At1g52200 | Expressed protein | 0.0012 | 0.0082 | -4.7 |
| 263799_at   | At2g24550 | Expressed protein | 0.0016 | 0.0093 | -4.7 |
| 265569_at   | At2g05620 | Expressed protein | 0.0024 | 0.0112 | -4.7 |
| 255745_at   | At1g32030 | Expressed protein | 0.0242 | 0.0341 | -4.7 |
| 264635_at   | At1g65500 | Expressed protein | 0.0305 | 0.0384 | -4.6 |
| 255954_at   | At1g22090 | Expressed protein | 0.0178 | 0.0292 | -4.6 |
| 259847_at   | At1g72170 | Expressed protein | 0.0060 | 0.0172 | -4.6 |
| 247930_at   | At5g57060 | Expressed protein | 0.0202 | 0.0311 | -4.6 |
| 253045_at   | At4g37445 | Expressed protein | 0.0486 | 0.0494 | -4.6 |
| 247725_at   | At5g59410 | Expressed protein | 0.0124 | 0.0245 | -4.5 |
| 255809_at   | At4g10300 | Expressed protein | 0.0027 | 0.0119 | -4.5 |
| 257707_at   | At3g12650 | Expressed protein | 0.0123 | 0.0244 | -4.5 |
| 258058_at   | At3g28980 | Expressed protein | 0.0477 | 0.0487 | -4.5 |
| 247610_at   | At5g60630 | Expressed protein | 0.0119 | 0.0240 | -4.5 |
| 253670_at   | At4g30010 | Expressed protein | 0.0026 | 0.0118 | -4.5 |
| 259766_at   | At1g64360 | Expressed protein | 0.0103 | 0.0222 | -4.4 |
| 265184_at   | At1g23710 | Expressed protein | 0.0172 | 0.0286 | -4.4 |
| 255028_at   | At4g09890 | Expressed protein | 0.0003 | 0.0040 | -4.4 |
| 249889_at   | At5g22540 | Expressed protein | 0.0263 | 0.0356 | -4.4 |
| 253292_at   | At4g33985 | Expressed protein | 0.0419 | 0.0454 | -4.3 |
| 261535_at   | At1g01725 | Expressed protein | 0.0165 | 0.0282 | -4.3 |
| 250289_at   | At5g13190 | Expressed protein | 0.0070 | 0.0183 | -4.3 |
| 267239_at   | At2g02510 | Expressed protein | 0.0035 | 0.0135 | -4.3 |
| 263638_at   | At2g25310 | Expressed protein | 0.0051 | 0.0160 | -4.3 |
| 256506_at   | At1g75160 | Expressed protein | 0.0278 | 0.0367 | -4.3 |
| 263981_at   | At2g42870 | Expressed protein | 0.0380 | 0.0431 | -4.3 |
| 267259_at   | At2g23090 | Expressed protein | 0.0101 | 0.0220 | -4.3 |
| 257477_at   | At1g10660 | Expressed protein | 0.0263 | 0.0356 | -4.3 |
| 263370_at   | At2g20500 | Expressed protein | 0.0184 | 0.0297 | -4.3 |
| 260651_at   | At1g32460 | Expressed protein | 0.0114 | 0.0234 | -4.3 |
| 245642_at   | At1g25275 | Expressed protein | 0.0013 | 0.0085 | -4.2 |
| 267225_at   | At2g44000 | Expressed protein | 0.0386 | 0.0435 | -4.2 |
| 265628_at   | At2g27290 | Expressed protein | 0.0034 | 0.0133 | -4.2 |
| 265571_s_at | At2g28230 | Expressed protein | 0.0006 | 0.0060 | -4.1 |
| 251650_at   | At3g57360 | Expressed protein | 0.0189 | 0.0301 | -4.1 |

|           |           |                   |        |        |      |
|-----------|-----------|-------------------|--------|--------|------|
| 248889_at | At5g46230 | Expressed protein | 0.0076 | 0.0192 | -4.1 |
| 254779_at | At4g12760 | Expressed protein | 0.0000 | 0.0005 | -4.1 |
| 254751_at | At4g13150 | Expressed protein | 0.0021 | 0.0106 | -4.1 |
| 266916_at | At2g45860 | Expressed protein | 0.0114 | 0.0234 | -4.1 |
| 261297_at | At1g48500 | Expressed protein | 0.0017 | 0.0096 | -4.1 |
| 249107_at | At5g43680 | Expressed protein | 0.0151 | 0.0271 | -4.1 |
| 258793_at | At3g04780 | Expressed protein | 0.0326 | 0.0397 | -4.0 |
| 258201_at | At3g13910 | Expressed protein | 0.0006 | 0.0058 | -4.0 |
| 261304_at | At1g48440 | Expressed protein | 0.0000 | 0.0017 | -4.0 |
| 267383_at | At2g44360 | Expressed protein | 0.0299 | 0.0380 | -4.0 |
| 252073_at | At3g51750 | Expressed protein | 0.0196 | 0.0306 | -4.0 |
| 252412_at | At3g47295 | Expressed protein | 0.0422 | 0.0456 | -4.0 |
| 265481_at | At2g15960 | Expressed protein | 0.0006 | 0.0063 | -4.0 |
| 253762_at | At4g28830 | Expressed protein | 0.0095 | 0.0213 | -4.0 |
| 250796_at | At5g05300 | Expressed protein | 0.0039 | 0.0143 | -3.9 |
| 258468_at | At3g06070 | Expressed protein | 0.0004 | 0.0053 | -3.9 |
| 249297_at | At5g41320 | Expressed protein | 0.0450 | 0.0474 | -3.9 |
| 256934_at | At3g22530 | Expressed protein | 0.0051 | 0.0160 | -3.9 |
| 258049_at | At3g16220 | Expressed protein | 0.0012 | 0.0083 | -3.9 |
| 250511_at | At5g09960 | Expressed protein | 0.0162 | 0.0280 | -3.9 |
| 248415_at | At5g51620 | Expressed protein | 0.0082 | 0.0199 | -3.9 |
| 263023_at | At1g23960 | Expressed protein | 0.0000 | 0.0008 | -3.9 |
| 262868_at | At1g64980 | Expressed protein | 0.0028 | 0.0122 | -3.9 |
| 248186_at | At5g53880 | Expressed protein | 0.0014 | 0.0089 | -3.9 |
| 246479_at | At5g16060 | Expressed protein | 0.0002 | 0.0040 | -3.9 |
| 258413_at | At3g17300 | Expressed protein | 0.0158 | 0.0276 | -3.9 |
| 250018_at | At5g18150 | Expressed protein | 0.0468 | 0.0483 | -3.9 |
| 258935_at | At3g10120 | Expressed protein | 0.0138 | 0.0258 | -3.8 |
| 246631_at | At1g50740 | Expressed protein | 0.0063 | 0.0175 | -3.8 |
| 261987_at | At1g33710 | Expressed protein | 0.0260 | 0.0354 | -3.8 |
| 249988_at | At5g18310 | Expressed protein | 0.0087 | 0.0203 | -3.8 |
| 266521_at | At2g24020 | Expressed protein | 0.0000 | 0.0008 | -3.7 |
| 264738_at | At1g62250 | Expressed protein | 0.0016 | 0.0095 | -3.7 |
| 257421_at | At1g12030 | Expressed protein | 0.0343 | 0.0408 | -3.7 |
| 261940_at | At1g22520 | Expressed protein | 0.0018 | 0.0100 | -3.7 |
| 251036_at | At5g02160 | Expressed protein | 0.0195 | 0.0305 | -3.7 |
| 263410_at | At2g04039 | Expressed protein | 0.0202 | 0.0311 | -3.6 |
| 261802_at | At1g30550 | Expressed protein | 0.0304 | 0.0383 | -3.6 |
| 264164_at | At1g65295 | Expressed protein | 0.0008 | 0.0070 | -3.6 |
| 249778_at | At5g24165 | Expressed protein | 0.0068 | 0.0181 | -3.6 |
| 246539_at | At5g15460 | Expressed protein | 0.0054 | 0.0164 | -3.6 |
| 263785_at | At2g46390 | Expressed protein | 0.0219 | 0.0323 | -3.6 |
| 254158_at | At4g24380 | Expressed protein | 0.0081 | 0.0197 | -3.6 |
| 255648_at | At4g00910 | Expressed protein | 0.0345 | 0.0410 | -3.6 |
| 245491_at | At4g16320 | Expressed protein | 0.0442 | 0.0470 | -3.6 |
| 249076_at | At5g43970 | Expressed protein | 0.0007 | 0.0065 | -3.5 |
| 264879_at | At1g61260 | Expressed protein | 0.0078 | 0.0193 | -3.5 |
| 247800_at | At5g58570 | Expressed protein | 0.0068 | 0.0181 | -3.5 |
| 254161_at | At4g24370 | Expressed protein | 0.0010 | 0.0076 | -3.5 |
| 248028_at | At5g55620 | Expressed protein | 0.0434 | 0.0464 | -3.5 |
| 266811_at | At2g44850 | Expressed protein | 0.0003 | 0.0040 | -3.5 |
| 264241_at | At1g54840 | Expressed protein | 0.0239 | 0.0339 | -3.5 |
| 255810_at | At4g10140 | Expressed protein | 0.0407 | 0.0448 | -3.5 |
| 246630_at | At1g50730 | Expressed protein | 0.0037 | 0.0140 | -3.5 |
| 253827_at | At4g28085 | Expressed protein | 0.0145 | 0.0264 | -3.4 |
| 267575_at | At2g30690 | Expressed protein | 0.0090 | 0.0208 | -3.4 |
| 266806_at | At2g30000 | Expressed protein | 0.0001 | 0.0021 | -3.4 |
| 252661_at | At3g44450 | Expressed protein | 0.0067 | 0.0180 | -3.4 |
| 260200_at | At1g67620 | Expressed protein | 0.0139 | 0.0259 | -3.4 |
| 254190_at | At4g23885 | Expressed protein | 0.0093 | 0.0210 | -3.4 |
| 267108_at | At2g14830 | Expressed protein | 0.0381 | 0.0432 | -3.4 |
| 263710_at | At1g09330 | Expressed protein | 0.0083 | 0.0200 | -3.4 |
| 261422_at | At1g18730 | Expressed protein | 0.0000 | 0.0008 | -3.4 |
| 255733_at | At1g25400 | Expressed protein | 0.0092 | 0.0209 | -3.4 |
| 258244_at | At3g27770 | Expressed protein | 0.0316 | 0.0391 | -3.4 |
| 256456_at | At1g75180 | Expressed protein | 0.0353 | 0.0414 | -3.4 |
| 249332_at | At5g40980 | Expressed protein | 0.0080 | 0.0196 | -3.4 |
| 253537_at | At4g31560 | Expressed protein | 0.0015 | 0.0090 | -3.3 |

|             |           |                   |        |        |      |
|-------------|-----------|-------------------|--------|--------|------|
| 249358_at   | At5g40510 | Expressed protein | 0.0036 | 0.0138 | -3.3 |
| 254629_at   | At4g18425 | Expressed protein | 0.0153 | 0.0272 | -3.3 |
| 249752_at   | At5g24660 | Expressed protein | 0.0042 | 0.0147 | -3.3 |
| 257953_at   | At3g21865 | Expressed protein | 0.0118 | 0.0238 | -3.3 |
| 253325_at   | At4g33925 | Expressed protein | 0.0397 | 0.0441 | -3.3 |
| 250225_at   | At5g14105 | Expressed protein | 0.0175 | 0.0289 | -3.3 |
| 249522_at   | At5g38700 | Expressed protein | 0.0113 | 0.0233 | -3.3 |
| 257074_at   | At3g19660 | Expressed protein | 0.0134 | 0.0255 | -3.3 |
| 249555_at   | At5g38300 | Expressed protein | 0.0318 | 0.0392 | -3.3 |
| 251241_s_at | At3g62460 | Expressed protein | 0.0029 | 0.0123 | -3.3 |
| 262000_at   | At1g33810 | Expressed protein | 0.0145 | 0.0264 | -3.3 |
| 263772_at   | At2g06255 | Expressed protein | 0.0063 | 0.0175 | -3.3 |
| 263305_at   | At2g01930 | Expressed protein | 0.0091 | 0.0208 | -3.3 |
| 266101_at   | At2g37940 | Expressed protein | 0.0121 | 0.0242 | -3.3 |
| 247083_at   | At5g66290 | Expressed protein | 0.0355 | 0.0415 | -3.2 |
| 256337_at   | At1g72060 | Expressed protein | 0.0324 | 0.0396 | -3.2 |
| 258393_at   | At3g15480 | Expressed protein | 0.0147 | 0.0267 | -3.2 |
| 258681_at   | At3g08610 | Expressed protein | 0.0145 | 0.0264 | -3.2 |
| 260174_at   | At1g71940 | Expressed protein | 0.0296 | 0.0379 | -3.2 |
| 258057_at   | At3g28970 | Expressed protein | 0.0159 | 0.0277 | -3.2 |
| 254626_at   | At4g18400 | Expressed protein | 0.0091 | 0.0208 | -3.2 |
| 263178_at   | At1g05550 | Expressed protein | 0.0162 | 0.0280 | -3.2 |
| 247293_at   | At5g64510 | Expressed protein | 0.0002 | 0.0037 | -3.2 |
| 250689_at   | At5g06610 | Expressed protein | 0.0346 | 0.0410 | -3.2 |
| 249918_at   | At5g19240 | Expressed protein | 0.0113 | 0.0233 | -3.2 |
| 259909_at   | At1g60870 | Expressed protein | 0.0009 | 0.0072 | -3.1 |
| 264735_s_at | At1g62060 | Expressed protein | 0.0409 | 0.0449 | -3.1 |
| 247072_at   | At5g66490 | Expressed protein | 0.0163 | 0.0280 | -3.1 |
| 246931_at   | At5g25170 | Expressed protein | 0.0042 | 0.0147 | -3.1 |
| 251655_at   | At3g57160 | Expressed protein | 0.0001 | 0.0028 | -3.1 |
| 249377_at   | At5g40690 | Expressed protein | 0.0126 | 0.0247 | -3.1 |
| 266039_s_at | At2g07739 | Expressed protein | 0.0248 | 0.0345 | -3.1 |
| 245755_at   | At1g35210 | Expressed protein | 0.0457 | 0.0478 | -3.0 |
| 264579_at   | At1g05205 | Expressed protein | 0.0003 | 0.0042 | -3.0 |
| 260555_at   | At2g41780 | Expressed protein | 0.0168 | 0.0283 | -3.0 |
| 263673_at   | At2g04800 | Expressed protein | 0.0029 | 0.0125 | -3.0 |
| 247177_at   | At5g65300 | Expressed protein | 0.0011 | 0.0079 | -3.0 |
| 246584_at   | At5g14730 | Expressed protein | 0.0002 | 0.0035 | -3.0 |
| 248196_at   | At5g54150 | Expressed protein | 0.0371 | 0.0425 | -3.0 |
| 265849_at   | At2g35736 | Expressed protein | 0.0231 | 0.0334 | -3.0 |
| 249285_at   | At5g41960 | Expressed protein | 0.0018 | 0.0098 | -3.0 |
| 255808_at   | At4g10280 | Expressed protein | 0.0204 | 0.0313 | -3.0 |
| 248302_at   | At5g53160 | Expressed protein | 0.0244 | 0.0343 | -3.0 |
| 265674_at   | At2g32190 | Expressed protein | 0.0006 | 0.0060 | -3.0 |
| 261748_at   | At1g76070 | Expressed protein | 0.0064 | 0.0177 | -3.0 |
| 258091_at   | At3g14560 | Expressed protein | 0.0014 | 0.0089 | -2.9 |
| 246008_at   | At5g08320 | Expressed protein | 0.0167 | 0.0283 | -2.9 |
| 257800_at   | At3g15900 | Expressed protein | 0.0310 | 0.0387 | -2.9 |
| 253119_at   | At4g35980 | Expressed protein | 0.0031 | 0.0128 | -2.9 |
| 254930_at   | At4g11450 | Expressed protein | 0.0036 | 0.0137 | -2.9 |
| 249313_at   | At5g41560 | Expressed protein | 0.0123 | 0.0245 | -2.9 |
| 266801_at   | At2g22870 | Expressed protein | 0.0256 | 0.0352 | -2.9 |
| 265386_at   | At2g20930 | Expressed protein | 0.0092 | 0.0209 | -2.9 |
| 246708_at   | At5g28150 | Expressed protein | 0.0229 | 0.0332 | -2.9 |
| 260211_at   | At1g74440 | Expressed protein | 0.0317 | 0.0391 | -2.9 |
| 266094_at   | At2g37975 | Expressed protein | 0.0181 | 0.0295 | -2.9 |
| 267370_at   | At2g44525 | Expressed protein | 0.0329 | 0.0399 | -2.8 |
| 252676_at   | At3g44280 | Expressed protein | 0.0171 | 0.0286 | -2.8 |
| 265767_at   | At2g48110 | Expressed protein | 0.0128 | 0.0249 | -2.8 |
| 266334_at   | At2g32380 | Expressed protein | 0.0284 | 0.0371 | -2.8 |
| 267623_at   | At2g39650 | Expressed protein | 0.0092 | 0.0209 | -2.8 |
| 252541_at   | At3g45750 | Expressed protein | 0.0089 | 0.0206 | -2.8 |
| 253694_at   | At4g29735 | Expressed protein | 0.0167 | 0.0282 | -2.8 |
| 254240_at   | At4g23496 | Expressed protein | 0.0017 | 0.0097 | -2.8 |
| 253870_at   | At4g27530 | Expressed protein | 0.0428 | 0.0460 | -2.8 |
| 262217_at   | At1g74770 | Expressed protein | 0.0167 | 0.0282 | -2.8 |
| 262481_at   | At1g17080 | Expressed protein | 0.0330 | 0.0399 | -2.8 |
| 266556_at   | At2g46230 | Expressed protein | 0.0485 | 0.0493 | -2.8 |

|             |           |                      |        |        |       |
|-------------|-----------|----------------------|--------|--------|-------|
| 255672_at   | At4g00310 | Expressed protein    | 0.0410 | 0.0449 | -2.8  |
| 260072_at   | At1g73650 | Expressed protein    | 0.0057 | 0.0169 | -2.7  |
| 257055_at   | At3g15351 | Expressed protein    | 0.0166 | 0.0282 | -2.7  |
| 252603_at   | At3g45050 | Expressed protein    | 0.0038 | 0.0141 | -2.7  |
| 257710_at   | At3g27350 | Expressed protein    | 0.0132 | 0.0253 | -2.7  |
| 255331_at   | At4g04330 | Expressed protein    | 0.0019 | 0.0101 | -2.7  |
| 253691_at   | At4g29660 | Expressed protein    | 0.0252 | 0.0349 | -2.7  |
| 249519_at   | At5g38660 | Expressed protein    | 0.0076 | 0.0191 | -2.7  |
| 262287_at   | At1g68660 | Expressed protein    | 0.0315 | 0.0390 | -2.7  |
| 262622_at   | At1g06510 | Expressed protein    | 0.0043 | 0.0148 | -2.7  |
| 256766_at   | At3g22231 | Expressed protein    | 0.0196 | 0.0306 | -2.7  |
| 262199_at   | At1g53800 | Expressed protein    | 0.0103 | 0.0222 | -2.7  |
| 257951_at   | At3g21700 | Expressed protein    | 0.0009 | 0.0074 | -2.7  |
| 263442_at   | At2g28605 | Expressed protein    | 0.0029 | 0.0124 | -2.6  |
| 265459_at   | At2g46540 | Expressed protein    | 0.0096 | 0.0214 | -2.6  |
| 263737_at   | At1g60010 | Expressed protein    | 0.0355 | 0.0415 | -2.6  |
| 262801_at   | At1g21010 | Expressed protein    | 0.0141 | 0.0261 | -2.6  |
| 257780_at   | At3g27100 | Expressed protein    | 0.0112 | 0.0232 | -2.6  |
| 262399_at   | At1g49500 | Expressed protein    | 0.0276 | 0.0365 | -2.6  |
| 247213_at   | At5g64900 | Expressed protein    | 0.0005 | 0.0058 | -2.6  |
| 246020_at   | At5g10710 | Expressed protein    | 0.0216 | 0.0322 | -2.6  |
| 260916_at   | At1g02475 | Expressed protein    | 0.0409 | 0.0449 | -2.6  |
| 260004_at   | At1g67860 | Expressed protein    | 0.0000 | 0.0006 | -2.6  |
| 261038_at   | At1g17490 | Expressed protein    | 0.0352 | 0.0414 | -2.6  |
| 261951_at   | At1g64490 | Expressed protein    | 0.0280 | 0.0368 | -2.6  |
| 254429_at   | At4g21105 | Expressed protein    | 0.0334 | 0.0401 | -2.6  |
| 246010_at   | At5g08440 | Expressed protein    | 0.0317 | 0.0391 | -2.6  |
| 252789_s_at | At3g42150 | Expressed protein    | 0.0303 | 0.0382 | -2.6  |
| 251727_at   | At3g56290 | Expressed protein    | 0.0009 | 0.0073 | -2.6  |
| 248401_at   | At5g52110 | Expressed protein    | 0.0192 | 0.0302 | -2.6  |
| 254557_at   | At4g19140 | Expressed protein    | 0.0268 | 0.0360 | -2.5  |
| 248044_at   | At5g56020 | Expressed protein    | 0.0174 | 0.0289 | -2.5  |
| 265226_at   | At2g28430 | Expressed protein    | 0.0494 | 0.0497 | -2.5  |
| 247258_at   | At5g64816 | Expressed protein    | 0.0043 | 0.0148 | -2.5  |
| 248819_at   | At5g47050 | Expressed protein    | 0.0058 | 0.0169 | -2.5  |
| 249230_at   | At5g42070 | Expressed protein    | 0.0006 | 0.0060 | -2.5  |
| 247399_at   | At5g62960 | Expressed protein    | 0.0454 | 0.0477 | -2.5  |
| 249727_at   | At5g35490 | Expressed protein    | 0.0184 | 0.0297 | -4.6  |
| 261980_at   | At1g33820 | Hypothetical protein | 0.0035 | 0.0135 | -48.2 |
| 265293_at   | At2g14020 | Hypothetical protein | 0.0001 | 0.0027 | -47.1 |
| 257133_at   | At3g17190 | Hypothetical protein | 0.0000 | 0.0006 | -32.0 |
| 256642_at   | At3g32280 | Hypothetical protein | 0.0026 | 0.0118 | -30.9 |
| 248617_at   | At5g49590 | Hypothetical protein | 0.0082 | 0.0199 | -19.2 |
| 247913_at   | At5g57510 | Hypothetical protein | 0.0026 | 0.0118 | -18.5 |
| 261778_at   | At1g76220 | Hypothetical protein | 0.0109 | 0.0229 | -18.0 |
| 257575_at   | At3g29265 | Hypothetical protein | 0.0000 | 0.0007 | -17.1 |
| 256668_at   | At3g32190 | Hypothetical protein | 0.0071 | 0.0185 | -16.9 |
| 257561_at   | At3g24270 | Hypothetical protein | 0.0170 | 0.0285 | -16.7 |
| 257839_at   | At3g25080 | Hypothetical protein | 0.0105 | 0.0225 | -14.9 |
| 261706_at   | At1g32680 | Hypothetical protein | 0.0040 | 0.0145 | -14.3 |
| 246873_at   | At5g26100 | Hypothetical protein | 0.0061 | 0.0173 | -14.0 |
| 257070_at   | At3g28190 | Hypothetical protein | 0.0009 | 0.0073 | -13.9 |
| 262792_at   | At1g10710 | Hypothetical protein | 0.0155 | 0.0274 | -13.3 |
| 254302_at   | At4g22800 | Hypothetical protein | 0.0441 | 0.0469 | -12.7 |
| 245648_at   | At1g24938 | Hypothetical protein | 0.0371 | 0.0425 | -12.3 |
| 256925_at   | At3g29600 | Hypothetical protein | 0.0441 | 0.0469 | -12.2 |
| 256718_at   | At2g34120 | Hypothetical protein | 0.0111 | 0.0231 | -12.2 |
| 257118_at   | At3g20180 | Hypothetical protein | 0.0042 | 0.0146 | -11.9 |
| 261760_at   | At1g15600 | Hypothetical protein | 0.0077 | 0.0193 | -11.5 |
| 255744_at   | At1g32040 | Hypothetical protein | 0.0458 | 0.0479 | -11.5 |
| 267424_at   | At2g34800 | Hypothetical protein | 0.0068 | 0.0181 | -10.8 |
| 263308_at   | At2g10380 | Hypothetical protein | 0.0100 | 0.0218 | -10.7 |
| 249531_at   | At5g38770 | Hypothetical protein | 0.0152 | 0.0272 | -10.7 |
| 263309_at   | At2g10370 | Hypothetical protein | 0.0217 | 0.0323 | -10.1 |
| 259621_at   | At1g42710 | Hypothetical protein | 0.0294 | 0.0377 | -9.8  |
| 255092_s_at | At4g09400 | Hypothetical protein | 0.0001 | 0.0028 | -9.4  |
| 262719_at   | At1g43590 | Hypothetical protein | 0.0312 | 0.0388 | -9.3  |
| 248776_at   | At5g47900 | Hypothetical protein | 0.0159 | 0.0277 | -9.3  |

|             |           |                                  |        |        |       |
|-------------|-----------|----------------------------------|--------|--------|-------|
| 259772_at   | At1g29480 | Hypothetical protein             | 0.0400 | 0.0443 | -8.7  |
| 256687_x_at | At3g32120 | Hypothetical protein             | 0.0058 | 0.0169 | -7.9  |
| 259779_s_at | At1g29620 | Hypothetical protein             | 0.0174 | 0.0288 | -7.6  |
| 259389_at   | At1g06320 | Hypothetical protein             | 0.0154 | 0.0273 | -7.6  |
| 255246_at   | At4g05640 | Hypothetical protein             | 0.0058 | 0.0169 | -7.5  |
| 259465_at   | At1g19030 | Hypothetical protein             | 0.0375 | 0.0428 | -7.4  |
| 265529_at   | At2g06230 | Hypothetical protein             | 0.0075 | 0.0189 | -7.3  |
| 249001_at   | At5g44990 | Hypothetical protein             | 0.0328 | 0.0398 | -7.2  |
| 263860_at   | At2g04330 | Hypothetical protein             | 0.0225 | 0.0329 | -7.2  |
| 265215_at   | At1g05040 | Hypothetical protein             | 0.0489 | 0.0495 | -7.1  |
| 266049_at   | At2g40780 | Hypothetical protein             | 0.0002 | 0.0034 | -7.1  |
| 257742_at   | At3g27370 | Hypothetical protein             | 0.0438 | 0.0467 | -6.9  |
| 262902_x_at | At1g59930 | Hypothetical protein             | 0.0001 | 0.0019 | -6.8  |
| 261251_at   | At1g05920 | Hypothetical protein             | 0.0200 | 0.0309 | -6.8  |
| 263742_at   | At2g20625 | Hypothetical protein             | 0.0068 | 0.0181 | -6.3  |
| 265812_at   | At2g18070 | Hypothetical protein             | 0.0073 | 0.0187 | -6.2  |
| 248645_at   | At5g49150 | Hypothetical protein             | 0.0262 | 0.0356 | -6.1  |
| 255918_at   | At5g28570 | Hypothetical protein             | 0.0096 | 0.0215 | -6.0  |
| 252757_at   | At3g42700 | Hypothetical protein             | 0.0348 | 0.0411 | -5.9  |
| 263338_at   | At2g05000 | Hypothetical protein             | 0.0250 | 0.0347 | -5.9  |
| 257418_at   | At1g30850 | Hypothetical protein             | 0.0001 | 0.0028 | -5.9  |
| 263091_at   | At2g16200 | Hypothetical protein             | 0.0019 | 0.0101 | -5.8  |
| 254700_at   | At4g18000 | Hypothetical protein             | 0.0397 | 0.0441 | -5.7  |
| 260658_at   | At1g19410 | Hypothetical protein             | 0.0072 | 0.0186 | -5.7  |
| 264943_at   | At1g76910 | Hypothetical protein             | 0.0323 | 0.0395 | -5.7  |
| 252581_at   | At3g45500 | Hypothetical protein             | 0.0374 | 0.0427 | -5.6  |
| 260198_at   | At1g67635 | Hypothetical protein             | 0.0002 | 0.0039 | -5.4  |
| 254139_at   | At4g24600 | Hypothetical protein             | 0.0419 | 0.0454 | -5.4  |
| 249455_s_at | At5g39540 | Hypothetical protein             | 0.0469 | 0.0483 | -5.2  |
| 246720_at   | At5g28950 | Hypothetical protein             | 0.0040 | 0.0145 | -5.2  |
| 257301_at   | At3g30190 | Hypothetical protein             | 0.0007 | 0.0067 | -5.1  |
| 254712_at   | At4g18080 | Hypothetical protein             | 0.0196 | 0.0306 | -5.0  |
| 257316_at   | At3g30750 | Hypothetical protein             | 0.0470 | 0.0484 | -4.9  |
| 245203_at   | At3g33080 | Hypothetical protein             | 0.0001 | 0.0024 | -4.9  |
| 261288_at   | At1g37010 | Hypothetical protein             | 0.0206 | 0.0314 | -4.9  |
| 265785_at   | At2g07290 | Hypothetical protein             | 0.0005 | 0.0055 | -4.8  |
| 254511_at   | At4g20220 | Hypothetical protein             | 0.0001 | 0.0024 | -4.7  |
| 257489_at   | At1g07330 | Hypothetical protein             | 0.0008 | 0.0071 | -4.6  |
| 252749_at   | At3g43390 | Hypothetical protein             | 0.0498 | 0.0499 | -4.6  |
| 245220_at   | At1g59171 | Hypothetical protein             | 0.0405 | 0.0446 | -4.2  |
| 249062_at   | At5g44270 | Hypothetical protein             | 0.0084 | 0.0200 | -4.1  |
| 248141_at   | At5g55010 | Hypothetical protein             | 0.0017 | 0.0098 | -3.9  |
| 257962_at   | At3g19790 | Hypothetical protein             | 0.0161 | 0.0279 | -3.9  |
| 249648_at   | At5g37050 | Hypothetical protein             | 0.0137 | 0.0257 | -3.8  |
| 249394_at   | At5g40180 | Hypothetical protein             | 0.0073 | 0.0188 | -3.8  |
| 256692_at   | At3g32050 | Hypothetical protein             | 0.0000 | 0.0014 | -3.7  |
| 267203_at   | At2g31035 | Hypothetical protein             | 0.0380 | 0.0431 | -3.7  |
| 246823_at   | At5g26970 | Hypothetical protein             | 0.0450 | 0.0474 | -3.6  |
| 249615_x_at | At5g37420 | Hypothetical protein             | 0.0433 | 0.0464 | -3.6  |
| 265638_at   | At2g27340 | Hypothetical protein             | 0.0001 | 0.0028 | -3.4  |
| 260456_at   | At1g72490 | Hypothetical protein             | 0.0144 | 0.0263 | -3.4  |
| 254322_at   | At4g22600 | Hypothetical protein             | 0.0108 | 0.0228 | -3.3  |
| 262327_at   | At1g64130 | Hypothetical protein             | 0.0046 | 0.0152 | -3.3  |
| 255339_at   | At4g04480 | Hypothetical protein             | 0.0040 | 0.0145 | -3.2  |
| 260315_at   | At1g63820 | Hypothetical protein             | 0.0171 | 0.0286 | -3.1  |
| 265746_at   | At2g06630 | Hypothetical protein             | 0.0089 | 0.0206 | -3.1  |
| 264412_at   | At1g43260 | Hypothetical protein             | 0.0192 | 0.0303 | -3.0  |
| 260642_at   | At1g53260 | Hypothetical protein             | 0.0327 | 0.0398 | -3.0  |
| 252873_at   | At4g40020 | Hypothetical protein             | 0.0132 | 0.0253 | -2.6  |
| 256685_at   | At3g32100 | Hypothetical protein             | 0.0389 | 0.0437 | -2.6  |
| 250652_at   | At5g06920 | Hypothetical protein             | 0.0066 | 0.0179 | -2.5  |
| 255712_at   | At4g00280 | Hypothetical protein             | 0.0015 | 0.0091 | -2.5  |
| 252783_at   | At3g43020 | Pseudogene; Hypothetical protein | 0.0129 | 0.0251 | -5.4  |
| 262271_x_at | At1g42360 | Pseudogene; Hypothetical protein | 0.0014 | 0.0090 | -4.3  |
| 246128_at   | At5g32540 | Pseudogene; Hypothetical protein | 0.0225 | 0.0329 | -4.0  |
| 263272_at   | At2g11650 | Pseudogene; Hypothetical protein | 0.0492 | 0.0496 | -4.0  |
| 265409_at   | At2g16830 | Pseudogene; Hypothetical protein | 0.0354 | 0.0415 | -2.6  |
| 256195_at   | At1g36820 | Unknown protein                  | 0.0154 | 0.0273 | -18.0 |

|           |           |                 |        |        |       |
|-----------|-----------|-----------------|--------|--------|-------|
| 246360_at | At1g40952 | Unknown protein | 0.0160 | 0.0278 | -6.6  |
| 264213_at | At1g65400 | Unknown protein | 0.0073 | 0.0187 | -3.6  |
| 264072_at | At2g10750 | Unknown protein | 0.0005 | 0.0055 | -9.1  |
| 264112_at | At2g13675 | Unknown protein | 0.0000 | 0.0004 | -2.7  |
| 265578_at | At2g20090 | Unknown protein | 0.0416 | 0.0453 | -6.2  |
| 266907_at | At2g34550 | Unknown protein | 0.0042 | 0.0147 | -4.6  |
| 245095_at | At2g40870 | Unknown protein | 0.0412 | 0.0450 | -3.5  |
| 258349_at | At3g17610 | Unknown protein | 0.0075 | 0.0190 | -4.7  |
| 257784_at | At3g26970 | Unknown protein | 0.0073 | 0.0188 | -5.4  |
| 257220_at | At3g27812 | Unknown protein | 0.0173 | 0.0287 | -6.9  |
| 252028_at | At3g52650 | Unknown protein | 0.0256 | 0.0352 | -3.0  |
| 251953_at | At3g53660 | Unknown protein | 0.0179 | 0.0292 | -11.7 |
| 252897_at | At4g39490 | Unknown protein | 0.0016 | 0.0093 | -3.7  |
| 246839_at | At5g26718 | Unknown protein | 0.0011 | 0.0078 | -5.1  |
| 246670_at | At5g29584 | Unknown protein | 0.0148 | 0.0267 | -2.8  |
| 249667_at | At5g35850 | Unknown protein | 0.0192 | 0.0303 | -5.9  |
| 254521_at | At5g44810 | Unknown protein | 0.0155 | 0.0274 | -6.0  |

<sup>a</sup>Probe set ID represents Affymetrix probe set number.

<sup>b</sup>AGI represents *Arabidopsis* Genome Initiative (AGI) locus identifier that corresponds to each gene represented on the array.

<sup>c</sup> $q$ -value  $\leq 0.05$  (5% False discovery rate) was used to determine genes differentially expressed in PPV-infected leaves relative to mock-inoculated control leaves.

<sup>d</sup> $p$ -values ( $p \leq 0.05$ ) from the ANOVA were used to calculate  $q$ -value after adjusting the values using Benjamini and Hochberg [21] multiple testing correction.

<sup>e</sup>Calculation of fold changes was defined in Methods.

<sup>f</sup>Determined following the method of the *Arabidopsis* MIPS (Munich Information Centre for Protein Sequences) functional classification scheme.
