# Supplementary material for: Altered gene expression changes in Arabidopsis leaf tissues and protoplasts in response to Plum pox virus infection
Source: PubMed Central journal article supplement (PMC2478689; doi:10.1186/1471-2164-9-325), 2008-07-09
Supplement: 1471-2164-9-325-S3.pdf [file 1471-2164-9-325-S3.pdf]

**Supplemental Table 3.** Expression levels of differentially regulated genes in PPV-infected *Arabidopsis* protoplasts

| Probe IDs <sup>a</sup>                                                                                                          | AGI <sup>b</sup> locus | Annotation                                              | <i>q</i> -value <sup>c</sup> | <i>p</i> -value <sup>d</sup> | Fold Change <sup>e</sup> |       |        |
|---------------------------------------------------------------------------------------------------------------------------------|------------------------|---------------------------------------------------------|------------------------------|------------------------------|--------------------------|-------|--------|
|                                                                                                                                 |                        |                                                         |                              |                              | 3 hpt <sup>f</sup>       | 6 hpt | 12 hpt |
| <b>I. Genes induced in PPV-infected <i>Arabidopsis</i> protoplasts at one time point and not repressed at other time points</b> |                        |                                                         |                              |                              |                          |       |        |
| A. Defence and virulence <sup>g</sup>                                                                                           |                        |                                                         |                              |                              |                          |       |        |
| 256487_at                                                                                                                       | At1g31540              | Disease resistance protein, TIR-NBS-LRR class, putative | 0.0475                       | 0.0314                       | 2.97                     | 1.37  | -1.96  |
| 265682_at                                                                                                                       | At2g24390              | Avirulence induced gene (AIG) protein, related          | 0.0424                       | 0.0072                       | -1.92                    | 9.78  | 1.19   |
| 254582_at                                                                                                                       | At4g19470              | Disease resistance protein, related                     | 0.0475                       | 0.0369                       | -1.82                    | 5.13  | -2.44  |
| 253627_at                                                                                                                       | At4g30650              | Hydrophobic protein, putative                           | 0.0401                       | 0.0043                       | 1.35                     | 5.25  | -1.59  |
| 248989_at                                                                                                                       | At5g45200              | Disease resistance protein, TIR-NBS-LRRj                | 0.0431                       | 0.0085                       | -1.49                    | 6.39  | 2.12   |
| A1. Protein folding/heat shock/chaperone activity                                                                               |                        |                                                         |                              |                              |                          |       |        |
| 256999_at                                                                                                                       | At3g14200              | DNAJ heat shock protein                                 | 0.0482                       | 0.0413                       | 1.45                     | 10.29 | -2.08  |
| A2. Cell wall associated transcripts                                                                                            |                        |                                                         |                              |                              |                          |       |        |
| A2.1. Re-assembly of cell wall associated genes                                                                                 |                        |                                                         |                              |                              |                          |       |        |
| 260178_at                                                                                                                       | At1g70720              | invertase/pectin methylesterase inhibitor protein       | 0.0434                       | 0.0062                       | 2.33                     | -1.72 | 4.71   |
| 266877_at                                                                                                                       | At2g44570              | Glycosyl hydrolase family 9 protein                     | 0.0397                       | 0.0037                       | 5.21                     | 1.79  | -1.52  |
| 251250_at                                                                                                                       | At3g62180              | Pectin methylesterase, putative                         | 0.0448                       | 0.0200                       | -2.38                    | 2.64  | 1.92   |
| 253366_at                                                                                                                       | At4g33180              | Hydrolase family protein                                | 0.0484                       | 0.0417                       | 1.31                     | 4.09  | -1.09  |
| A2.2. Matrix polymers                                                                                                           |                        |                                                         |                              |                              |                          |       |        |
| 245465_at                                                                                                                       | At4g16590              | Glucosyltransferase, related                            | 0.0445                       | 0.0181                       | 3.15                     | 2.23  | -1.37  |
| B. Cellular communication/Signal transduction mechanism/transmembrane signal transduction                                       |                        |                                                         |                              |                              |                          |       |        |
| 260699_at                                                                                                                       | At1g32320              | MAP kinase, putative                                    | 0.0475                       | 0.0345                       | -2.22                    | 3.59  | -1.05  |
| 264719_at                                                                                                                       | At1g70110              | Lectin protein kinase family protein                    | 0.0466                       | 0.0251                       | -1.30                    | 4.62  | -1.75  |
| 257825_at                                                                                                                       | At3g26700              | Protein kinase, putative                                | 0.0424                       | 0.0072                       | -1.45                    | -1.19 | 3.19   |
| 249440_at                                                                                                                       | At5g40030              | Protein kinase PK1- like                                | 0.0441                       | 0.0104                       | -1.37                    | 6.90  | -2.22  |
| 247531_at                                                                                                                       | At5g61550              | Protein kinase 1, PK1                                   | 0.0445                       | 0.0160                       | 1.55                     | -2.00 | 3.35   |
| C. Cell Cycle/ DNA processing/chromatin regulation and cytoskeleton reorganization                                              |                        |                                                         |                              |                              |                          |       |        |
| 256587_at                                                                                                                       | At3g28780              | Histone H4 protein -like                                | 0.0466                       | 0.0257                       | -1.35                    | -1.61 | 2.52   |
| 264991_s_at                                                                                                                     | At3g43400              | Phagocytosis and cell motility protein ELMO1, related   | 0.0441                       | 0.0132                       | -1.09                    | 1.00  | 5.99   |
| 249572_at                                                                                                                       | At5g37630              | Chromosome condensation family protein                  | 0.0466                       | 0.0261                       | -1.49                    | 2.24  | 3.92   |
| 247192_at                                                                                                                       | At5g65360              | Histone H3                                              | 0.0434                       | 0.0093                       | -1.20                    | 2.55  | 1.07   |
| D. Development/storage proteins                                                                                                 |                        |                                                         |                              |                              |                          |       |        |
| 262752_at                                                                                                                       | At1g16330              | Cyclin family protein                                   | 0.0441                       | 0.0119                       | -1.59                    | 4.33  | -1.41  |
| 262393_at                                                                                                                       | At1g49490              | Extensin family protein                                 | 0.0494                       | 0.0442                       | 12.55                    | 1.16  | 1.01   |
| 267198_at                                                                                                                       | At2g30810              | Gibberellin-regulated family protein                    | 0.0467                       | 0.0264                       | -1.22                    | 1.10  | 26.53  |
| 251119_at                                                                                                                       | At3g63510              | Nitrogen regulation family protein                      | 0.0499                       | 0.0499                       | -1.19                    | -2.27 | 4.16   |
| 253012_at                                                                                                                       | At4g37900              | Glycine-rich protein                                    | 0.0445                       | 0.0158                       | 1.01                     | -2.08 | 3.61   |
| 249702_at                                                                                                                       | At5g35570              | Auxin-independent growth promoter protein, Axi 1        | 0.0489                       | 0.0445                       | -1.52                    | -1.67 | 2.72   |
| 248676_at                                                                                                                       | At5g48850              | male sterility MS5 family protein                       | 0.0475                       | 0.0258                       | 2.59                     | 2.26  | -1.45  |
| 248636_at                                                                                                                       | At5g49080              | Extensin-like family protein                            | 0.0390                       | 0.0025                       | -1.09                    | 4.64  | -2.08  |
| 247016_at                                                                                                                       | At5g66970              | Signal recognition particle 54 K protein                | 0.0448                       | 0.0194                       | 1.93                     | 8.47  | -1.11  |
| D1. Chloroplast                                                                                                                 |                        |                                                         |                              |                              |                          |       |        |
| 262774_at                                                                                                                       | At1g13230              | Chloroplast nucleoid DNA binding protein, putative      | 0.0448                       | 0.0195                       | 1.53                     | -2.27 | 5.58   |
| E. Metabolism/energy/membrane associated proteins                                                                               |                        |                                                         |                              |                              |                          |       |        |
| E2. Primary /secondary metabolism                                                                                               |                        |                                                         |                              |                              |                          |       |        |
| 260475_at                                                                                                                       | At1g11080              | Serine carboxypeptidase S10 family protein              | 0.0398                       | 0.0040                       | -1.22                    | -1.30 | 6.75   |
| 261529_at                                                                                                                       | At1g14430              | glyoxal oxidase-related                                 | 0.0434                       | 0.0089                       | -1.52                    | 10.14 | 1.50   |
| 261029_at                                                                                                                       | At1g17330              | Metal-dependent phosphohydrolase protein                | 0.0417                       | 0.0068                       | 1.19                     | 3.60  | -1.52  |
| 245650_at                                                                                                                       | At1g24735              | Caffeoyl-CoA 3-O-methyltransferase, putative            | 0.0475                       | 0.0321                       | -1.18                    | 2.65  | -1.54  |
| 262465_at                                                                                                                       | At1g50270              | Pentatricopeptide (PPR) repeat-containing protein       | 0.0494                       | 0.0468                       | -1.37                    | 6.27  | 2.04   |

|                                                           |           |                                                             |        |        |       |       |       |
|-----------------------------------------------------------|-----------|-------------------------------------------------------------|--------|--------|-------|-------|-------|
| 256211_at                                                 | At1g50960 | Gibberellin 20-oxidase-related                              | 0.0494 | 0.0469 | -1.28 | 8.86  | -1.43 |
| 262184_at                                                 | At1g77910 | NADH Dehydrogenase                                          | 0.0477 | 0.0489 | 10.21 | -2.44 | 1.19  |
| 266308_at                                                 | At2g27010 | Cytochrome P450 family protein                              | 0.0475 | 0.0378 | -1.16 | 12.86 | -1.18 |
| 267416_at                                                 | At2g34980 | Phosphatidylinositol-glycan synthase, putative              | 0.0441 | 0.0124 | -1.14 | 5.72  | -1.75 |
| 258973_at                                                 | At3g01900 | Cytochrome P450 family protein                              | 0.0475 | 0.0337 | 1.34  | -2.44 | 2.62  |
| 258962_at                                                 | At3g10570 | Cytochrome P450, putative                                   | 0.0401 | 0.0044 | -1.20 | -1.01 | 6.66  |
| 258174_at                                                 | At3g21470 | Pentatricopeptide (PPR) repeat-containing protein           | 0.0494 | 0.0428 | -1.52 | -1.75 | 3.58  |
| 251881_at                                                 | At3g54250 | Mevalonate diphosphate decarboxylase, putative              | 0.0476 | 0.0383 | 1.04  | -1.12 | 3.80  |
| 246009_at                                                 | At5g08335 | Isoprenylcysteine carboxyl methyltransferase family protein | 0.0475 | 0.0380 | 2.80  | 1.59  | -1.59 |
| 249773_at                                                 | At5g24140 | Squalene monooxygenase 2, SM 2                              | 0.0434 | 0.0096 | -1.43 | 9.58  | 1.80  |
| 248104_at                                                 | At5g55250 | S-adenosyl-L-methionine, putative                           | 0.0465 | 0.0243 | -1.43 | 3.57  | -1.27 |
| 247005_at                                                 | At5g67520 | Adenylylsulfate kinase, putative                            | 0.0474 | 0.0300 | 1.93  | 2.67  | -1.45 |
| F. Proteins with binding function or cofactor requirement |           |                                                             |        |        |       |       |       |
| 260921_at                                                 | At1g21540 | AMP-binding protein, putative                               | 0.0460 | 0.0228 | -2.22 | 1.68  | 5.50  |
| 262303_at                                                 | At1g70930 | Homeobox protein, putative                                  | 0.0490 | 0.0450 | 1.56  | 4.29  | -1.10 |
| 267589_at                                                 | At2g42050 | Peptides precursor                                          | 0.0441 | 0.0120 | 3.11  | 1.82  | -2.00 |
| 259201_at                                                 | At3g09080 | Transducin family protein                                   | 0.0474 | 0.0345 | 5.82  | -1.92 | 1.31  |
| 251964_at                                                 | At3g53370 | DNA-binding family protein, S1FA                            | 0.0390 | 0.0026 | 3.30  | -1.39 | -1.22 |
| 255321_at                                                 | At4g04260 | BAH domain containing protein                               | 0.0475 | 0.0350 | 3.62  | 2.34  | -1.11 |
| 248692_s_at                                               | At4g15070 | DC1 domain containing protein                               | 0.0466 | 0.0258 | -2.38 | -1.04 | 9.94  |
| H. Protein fate                                           |           |                                                             |        |        |       |       |       |
| 267056_at                                                 | At2g32470 | F-box family protein, related                               | 0.0407 | 0.0056 | 1.06  | 8.98  | 1.34  |
| 258741_at                                                 | At3g05790 | Lon protease, putative                                      | 0.0485 | 0.0426 | 3.67  | 1.03  | -2.17 |
| 252500_at                                                 | At3g46860 | Serine protease inhibitor protein                           | 0.0495 | 0.0483 | 4.23  | -1.32 | -1.23 |
| 250162_at                                                 | At5g15250 | FtsH protease, putative                                     | 0.0479 | 0.0398 | 1.56  | 10.47 | -1.75 |
| H1. Ubiquitin like conjugating enzyme activity            |           |                                                             |        |        |       |       |       |
| 248662_at                                                 | At5g48690 | similar to ubiquitin-associated protein                     | 0.0474 | 0.0341 | 5.95  | -1.23 | -1.11 |
| I. Transcription/splicing/RNA processing                  |           |                                                             |        |        |       |       |       |
| 259595_at                                                 | At1g28050 | Zinc finger B-box type family protein                       | 0.0492 | 0.0455 | -1.02 | -2.08 | 3.83  |
| 259814_at                                                 | At1g49900 | Zinc finger family protein, C2H2 type                       | 0.0445 | 0.0180 | -1.09 | 5.58  | -2.44 |
| 265124_at                                                 | At1g55430 | Zinc finger protein-like CHP type, putative                 | 0.0448 | 0.0200 | -1.82 | 6.99  | -1.37 |
| 257414_at                                                 | At1g62110 | Mitochondrial transcription factor mTERF family protein     | 0.0475 | 0.0380 | -2.33 | 4.56  | -1.56 |
| 264945_at                                                 | At1g77070 | MADS-box protein MADS2, putative                            | 0.0493 | 0.0457 | 1.02  | 3.25  | -1.19 |
| 264294_at                                                 | At1g78750 | Heat shock transcription factor-like                        | 0.0475 | 0.0355 | 1.10  | 6.41  | -2.04 |
| 263723_at                                                 | At2g13500 | Zinc finger protein                                         | 0.0494 | 0.0427 | 2.08  | 4.66  | -2.44 |
| 263797_at                                                 | At2g24570 | WRKY family transcription factor                            | 0.0390 | 0.0029 | 1.19  | 3.62  | 1.08  |
| 266841_at                                                 | At2g26150 | Heat shock transcription factor, putative                   | 0.0475 | 0.0346 | 1.11  | -2.00 | 3.16  |
| 267177_at                                                 | At2g37580 | Zinc RING finger family protein, C3HC4-type                 | 0.0474 | 0.0293 | 13.22 | 2.20  | -1.09 |
| 256918_s_at                                               | At3g18960 | Transcriptional factor B3 family protein                    | 0.0441 | 0.0129 | 1.44  | -1.61 | 3.51  |
| 252128_at                                                 | At3g50870 | Zinc finger family protein, GATA type                       | 0.0434 | 0.0094 | 3.00  | 2.04  | -1.54 |
| 257488_s_at                                               | At4g00070 | Zinc finger protein, related                                | 0.0475 | 0.0372 | 1.26  | 5.99  | -2.38 |
| 245179_at                                                 | At5g12400 | PHD finger transcription factor, putative                   | 0.0465 | 0.0238 | -1.14 | -1.69 | 3.60  |
| 246531_at                                                 | At5g15800 | MADS box protein, AGL2                                      | 0.0448 | 0.0193 | -1.39 | 6.00  | -1.82 |
| 250051_at                                                 | At5g17800 | MYB family transcription factor, MYB56                      | 0.0424 | 0.0071 | -1.04 | -2.04 | 2.97  |
| 248596_at                                                 | At5g49330 | MYB family transcription factor                             | 0.0401 | 0.0043 | -1.43 | -1.92 | 6.03  |
| II. Helicase activity                                     |           |                                                             |        |        |       |       |       |
| 250138_at                                                 | At5g14610 | DEAD box RNA helicase, putative                             | 0.0492 | 0.0453 | -1.15 | -1.75 | 3.10  |
| J. Transporters                                           |           |                                                             |        |        |       |       |       |
| 262855_at                                                 | At1g20860 | Phosphate transporter family protein                        | 0.0409 | 0.0060 | 1.35  | 4.79  | -1.25 |
| 261455_at                                                 | At1g21070 | Transporter-related                                         | 0.0449 | 0.0203 | -2.00 | -2.00 | 4.04  |
| 257811_at                                                 | At3g25280 | Nitrate transporter, putative                               | 0.0494 | 0.0479 | -1.33 | 5.21  | 1.35  |
| 248275_at                                                 | At5g53520 | Oligopeptide transporter OPT family protein                 | 0.0488 | 0.0444 | 3.63  | 1.36  | -1.11 |
| K. Transposable elements, viral and plasmid proteins      |           |                                                             |        |        |       |       |       |
| 254366_s_at                                               | At4g22040 | Retrovirus-related polyprotein                              | 0.0465 | 0.0241 | 2.22  | 4.03  | -1.61 |

#### L. Unknown proteins

|             |           |                      |        |        |       |       |       |
|-------------|-----------|----------------------|--------|--------|-------|-------|-------|
| 261414_at   | At1g07795 | Expressed protein    | 0.0475 | 0.0318 | -1.92 | 1.24  | 3.24  |
| 259489_at   | At1g15790 | Expressed protein    | 0.0453 | 0.0201 | -1.61 | 2.89  | -1.39 |
| 262718_at   | At1g43570 | Expressed protein    | 0.0390 | 0.0023 | 4.09  | -1.37 | -2.22 |
| 262072_at   | At1g59590 | Expressed protein    | 0.0445 | 0.0146 | 3.43  | 1.33  | -1.22 |
| 264932_at   | At1g61240 | Expressed protein    | 0.0475 | 0.0268 | -1.54 | -1.41 | 4.04  |
| 262369_at   | At1g73010 | Expressed protein    | 0.0390 | 0.0013 | 2.60  | 1.50  | 1.35  |
| 265524_at   | At2g06180 | Unknown protein      | 0.0409 | 0.0178 | -2.38 | 5.94  | -1.27 |
| 263815_at   | At2g10020 | Expressed protein    | 0.0457 | 0.0208 | -1.14 | -1.79 | 2.93  |
| 265834_at   | At2g14410 | Unknown protein      | 0.0445 | 0.0145 | 1.06  | 4.46  | -2.00 |
| 265491_s_at | At2g15650 | Unknown protein      | 0.0407 | 0.0052 | -2.27 | -1.67 | 4.05  |
| 263742_at   | At2g20625 | Expressed protein    | 0.0390 | 0.0027 | 2.19  | 9.64  | -1.02 |
| 266128_at   | At2g45000 | Expressed protein    | 0.0401 | 0.0042 | 6.49  | -1.28 | 1.02  |
| 259195_at   | At3g01730 | Expressed protein    | 0.0446 | 0.0185 | -2.22 | 1.62  | 9.32  |
| 258703_at   | At3g09750 | Expressed protein    | 0.0471 | 0.0339 | 4.14  | -1.30 | -1.30 |
| 257901_at   | At3g28440 | Unknown protein      | 0.0441 | 0.0092 | -1.39 | 1.11  | 4.25  |
| 252778_at   | At3g42980 | Hypothetical protein | 0.0474 | 0.0300 | -1.69 | -2.44 | 5.10  |
| 252661_at   | At3g44450 | Expressed protein    | 0.0390 | 0.0022 | 1.25  | 2.87  | -1.22 |
| 255399_at   | At4g03750 | Hypothetical protein | 0.0388 | 0.0008 | 8.43  | -1.79 | -2.27 |
| 254484_at   | At4g20750 | Unknown protein      | 0.0475 | 0.0355 | -1.72 | 1.04  | 3.64  |
| 253827_at   | At4g28085 | Expressed protein    | 0.0441 | 0.0122 | 2.77  | 1.22  | -1.05 |
| 253689_at   | At4g29770 | Expressed protein    | 0.0496 | 0.0426 | 4.67  | -1.82 | -2.44 |
| 253289_at   | At4g34320 | Expressed protein    | 0.0405 | 0.0048 | 1.76  | 6.29  | -1.82 |
| 248941_s_at | At5g45460 | Expressed protein    | 0.0457 | 0.0219 | -1.72 | 1.08  | 4.22  |
| 248430_at   | At5g51800 | Expressed protein    | 0.0477 | 0.0491 | -1.82 | 6.76  | -1.72 |
| 247599_at   | At5g60880 | Expressed protein    | 0.0475 | 0.0364 | 5.93  | -1.41 | -1.96 |

## II. Genes repressed in PPV-infected *Arabidopsis* protoplasts at one time point and not induced at other time points

### A. Defence and virulence

|           |           |                                                          |        |        |       |        |       |
|-----------|-----------|----------------------------------------------------------|--------|--------|-------|--------|-------|
| 267041_at | At2g34315 | Disease Resistance Protein-Related                       | 0.0445 | 0.0159 | 1.27  | -1.32  | -4.17 |
| 253353_at | At4g33730 | Pathogenesis-Related Protein, Putative                   | 0.0475 | 0.0376 | 1.45  | -2.33  | -7.69 |
| 250037_at | At5g18350 | Disease Resistance Protein (TIR-NBS-LRR class), Putative | 0.0469 | 0.0485 | -1.15 | -16.72 | -2.91 |
| 246004_at | At5g20630 | Germin-Like Protein; Ger3                                | 0.0488 | 0.0444 | -2.38 | -2.94  | -1.39 |

### A1. Protein folding/heat shock/chaperone activity

|           |           |                                             |        |        |      |       |      |
|-----------|-----------|---------------------------------------------|--------|--------|------|-------|------|
| 259631_at | At1g56410 | Heat Shock Cognate 70 Kda Protein, Putative | 0.0445 | 0.0155 | 1.20 | -5.88 | 1.69 |
|-----------|-----------|---------------------------------------------|--------|--------|------|-------|------|

### A2. Cell wall associated transcripts

#### A2.1. Re-assembly of cell wall associated genes

|           |           |                                                             |        |        |       |        |       |
|-----------|-----------|-------------------------------------------------------------|--------|--------|-------|--------|-------|
| 256415_at | At3g11210 | Gdsl-Motif Lipase/Hydrolase Family Protein                  | 0.0447 | 0.0185 | 1.03  | 1.05   | -2.63 |
| 257896_at | At3g16920 | Glycoside Hydrolase Family 19 Protein                       | 0.0445 | 0.0168 | 1.20  | 2.06   | -3.78 |
| 255517_at | At4g02290 | Glycosyl Hydrolase Family 9 Protein                         | 0.0447 | 0.0183 | -1.04 | -11.11 | -2.38 |
| 253226_at | At4g35010 | Glycosyl Hydrolase Family 35 Protein                        | 0.0465 | 0.0237 | -3.12 | -2.75  | 1.10  |
| 247477_at | At5g62340 | Invertase/Pectin Methyltransferase Inhibitor Family Protein | 0.0445 | 0.0164 | -1.28 | -3.33  | 1.77  |

#### A2.2. Matrix polymers

|           |           |                                                          |        |        |      |       |       |
|-----------|-----------|----------------------------------------------------------|--------|--------|------|-------|-------|
| 261923_at | At1g22380 | Udp-Glucuronosyl/Udp-Glucosyl Transferase Family Protein | 0.0493 | 0.0463 | 1.51 | -6.55 | -3.14 |
|-----------|-----------|----------------------------------------------------------|--------|--------|------|-------|-------|

#### A2.3. Structural proteins

|           |           |                                 |        |        |       |       |       |
|-----------|-----------|---------------------------------|--------|--------|-------|-------|-------|
| 262002_at | At1g64450 | Proline-Rich Family Protein     | 0.0390 | 0.0030 | -1.28 | -8.33 | 1.25  |
| 253050_at | At4g37450 | Arabinogalactan-Protein (Agp18) | 0.0454 | 0.0215 | 1.49  | 1.40  | -6.12 |

### B. Cellular communication/Signal transduction mechanism/transmembrane signal transduction

|             |           |                                                              |        |        |       |       |        |
|-------------|-----------|--------------------------------------------------------------|--------|--------|-------|-------|--------|
| 261308_at   | At1g48480 | Leucine-Rich Repeat Transmembrane Protein Kinase, Putative   | 0.0448 | 0.0200 | -2.50 | -2.70 | 1.51   |
| 262141_s_at | At1g52460 | Phospholipase                                                | 0.0475 | 0.0373 | 1.88  | 1.96  | -12.64 |
| 262004_at   | At1g64480 | Calcineurin B-Like Protein 8 (Cbl8)                          | 0.0474 | 0.0310 | -4.87 | 1.74  | -1.60  |
| 258342_at   | At3g22800 | Leucine-Rich Repeat Family Protein / Extensin Family Protein | 0.0441 | 0.0106 | 2.27  | -3.03 | -2.00  |
| 257106_at   | At3g29060 | Exs Family Protein / Erd1/Xpr1/Syg1 Family Protein           | 0.0485 | 0.0426 | -8.38 | -1.68 | -1.23  |
| 248420_at   | At5g51560 | Leucine-Rich Repeat Transmembrane Protein Kinase, Putative   | 0.0466 | 0.0254 | 1.86  | 1.00  | -2.70  |

### C. Cell Cycle/ DNA processing/chromatin regulation and cytoskeleton reorganization

|           |           |                                    |        |        |       |      |       |
|-----------|-----------|------------------------------------|--------|--------|-------|------|-------|
| 253142_at | At4g35520 | Dna Mismatch Repair Family Protein | 0.0475 | 0.0370 | -1.38 | 1.00 | -3.32 |
|-----------|-----------|------------------------------------|--------|--------|-------|------|-------|

|           |           |                               |        |        |       |       |       |
|-----------|-----------|-------------------------------|--------|--------|-------|-------|-------|
| 245942_at | At5g19490 | Repressor Protein-Related     | 0.0493 | 0.0464 | 2.26  | -1.01 | -4.80 |
| 246776_at | At5g27550 | Kinesin Motor Protein-Related | 0.0458 | 0.0225 | -1.23 | -8.33 | -1.22 |

#### D. Development/storage proteins

|             |           |                                                                    |        |        |       |       |       |
|-------------|-----------|--------------------------------------------------------------------|--------|--------|-------|-------|-------|
| 263683_at   | At1g26870 | No Apical Meristem (Nam) Family Protein                            | 0.0475 | 0.0350 | 1.44  | -3.57 | 1.92  |
| 261703_at   | At1g32770 | No Apical Meristem (Nam) Family Protein                            | 0.0476 | 0.0387 | -3.23 | -1.11 | 1.97  |
| 262156_at   | At1g52680 | Late Embryogenesis Abundant Protein-Related                        | 0.0434 | 0.0097 | 1.17  | 1.40  | -6.81 |
| 267493_at   | At2g30400 | Ovate Family Protein                                               | 0.0479 | 0.0399 | 1.08  | -1.56 | -9.09 |
| 257718_at   | At3g18400 | No Apical Meristem (Nam) Family Protein                            | 0.0474 | 0.0306 | -5.00 | -2.86 | -1.04 |
| 251694_s_at | At3g56560 | No Apical Meristem (Nam) Family Protein                            | 0.0477 | 0.0391 | -4.20 | 1.50  | 1.76  |
| 255049_at   | At4g09610 | Gibberellin-Regulated Protein 2 / Gibberellin-Responsive Protein 2 | 0.0492 | 0.0453 | -2.55 | -4.79 | 2.23  |
| 254316_at   | At4g22500 | Pseudogene, Glycine-Rich Protein Family                            | 0.0475 | 0.0336 | -1.30 | -3.70 | 1.33  |
| 250682_x_at | At5g06630 | Extensin-Like Family Protein                                       | 0.0474 | 0.0308 | 2.11  | -8.25 | -5.11 |
| 248658_at   | At5g48600 | Structural Maintenance Of Chromosomes (Smc) Family Protein         | 0.0465 | 0.0238 | 1.13  | -3.33 | -1.30 |

#### E. Metabolism/energy/membrane associated proteins

##### E1. Carbohydrate/soluble sugar/starch/aminoacid metabolism

|           |           |                                                         |        |        |       |      |       |
|-----------|-----------|---------------------------------------------------------|--------|--------|-------|------|-------|
| 249729_at | At5g24410 | Glucosamine/Galactosamine-6-Phosphate Isomerase-Related | 0.0445 | 0.0153 | -5.24 | 2.42 | -5.96 |
| 247159_at | At5g65800 | 1-Aminocyclopropane-1-Carboxylate Synthase, Putative    | 0.0445 | 0.0142 | -2.91 | 2.38 | -4.04 |

##### E2. Primary /secondary metabolism

|           |           |                                                               |        |        |       |       |       |
|-----------|-----------|---------------------------------------------------------------|--------|--------|-------|-------|-------|
| 264251_at | At1g09190 | Pentatricopeptide (Ppr) Repeat-Containing Protein             | 0.0475 | 0.0380 | -2.27 | -4.48 | -1.22 |
| 260032_at | At1g68750 | Phosphoenolpyruvate Carboxylase Family Protein                | 0.0458 | 0.0225 | -2.05 | 1.28  | -3.17 |
| 263061_at | At2g18190 | Aaa-Type Atpase Family Protein                                | 0.0494 | 0.0478 | -1.28 | -2.84 | -1.63 |
| 265329_at | At2g18450 | Succinate Dehydrogenase                                       | 0.0445 | 0.0178 | 1.61  | -6.63 | 1.15  |
| 267434_at | At2g26260 | 3-Beta Hydroxysteroid Dehydrogenase/Isomerase Family Protein  | 0.0465 | 0.0248 | -3.38 | -4.96 | 1.45  |
| 266164_at | At2g28050 | Pentatricopeptide (Ppr) Repeat-Containing Protein             | 0.0465 | 0.0237 | -5.88 | -1.18 | 1.11  |
| 266286_at | At2g29170 | Dehydrogenase/Reductase (Sdr) Family Protein                  | 0.0445 | 0.0180 | 1.57  | -1.37 | -4.00 |
| 266751_at | At2g47020 | Peptide Chain Release Factor, Putative                        | 0.0445 | 0.0158 | 1.11  | -4.17 | 1.68  |
| 259206_at | At3g09040 | Pentatricopeptide (Ppr) Repeat-Containing Protein             | 0.0388 | 0.0008 | -1.10 | 1.79  | -3.22 |
| 252780_at | At3g42960 | Alcohol Dehydrogenase (Ata1)                                  | 0.0474 | 0.0301 | -4.93 | -1.62 | -1.44 |
| 252245_at | At3g49710 | Pentatricopeptide (Ppr) Repeat-Containing Protein             | 0.0431 | 0.0085 | -1.20 | -2.63 | 1.23  |
| 251394_at | At3g60900 | Fasciclin-Like Arabinogalactan-Protein (Fla10)                | 0.0441 | 0.0105 | -1.52 | -7.87 | 2.29  |
| 254065_at | At4g25420 | Gibberellin 20-Oxidase                                        | 0.0474 | 0.0296 | 1.50  | -4.00 | -1.61 |
| 253962_at | At4g26460 | Similar To S-Adenosyl-L-Methionine Carboxyl Methyltransferase | 0.0475 | 0.0351 | 1.25  | -5.56 | -1.33 |
| 253743_at | At4g28940 | Nucleosidase-Related                                          | 0.0441 | 0.0118 | 1.36  | -3.03 | 1.01  |
| 253149_at | At4g35650 | Nad+ Isocitrate Dehydrogenase, Putative                       | 0.0424 | 0.0072 | 2.22  | -4.55 | 1.67  |
| 249687_at | At5g36150 | Pentacyclic Triterpene Synthase, Putative                     | 0.0481 | 0.0403 | -1.23 | 2.00  | -9.09 |
| 248729_at | At5g48010 | Pentacyclic Triterpene Synthase, Putative                     | 0.0475 | 0.0361 | -6.27 | 1.22  | 1.68  |
| 248704_at | At5g48450 | Multi-Copper Oxidase Type I Family Protein                    | 0.0487 | 0.0433 | -2.04 | -1.03 | -5.00 |
| 248536_at | At5g50140 | Ankyrin Repeat Family Protein                                 | 0.0441 | 0.0112 | -5.88 | -1.72 | 1.41  |
| 247004_at | At5g67570 | Pentatricopeptide (Ppr) Repeat-Containing Protein             | 0.0461 | 0.0229 | -1.52 | -5.00 | 1.18  |

#### F. Proteins with binding function or cofactor requirement

|           |           |                                                           |        |        |       |       |       |
|-----------|-----------|-----------------------------------------------------------|--------|--------|-------|-------|-------|
| 245726_at | At1g73360 | Lipid-Binding Start Domain-Containing Protein             | 0.0482 | 0.0409 | 1.02  | -2.94 | -1.41 |
| 266712_at | At2g46750 | Fad-Binding Domain-Containing Protein                     | 0.0414 | 0.0065 | 2.36  | -1.21 | -4.66 |
| 257051_at | At3g15270 | Squamosa Promoter-Binding Protein-Like 5; Spl5            | 0.0448 | 0.0200 | 1.71  | 1.98  | -5.56 |
| 258241_at | At3g27650 | Lob Domain Protein 25                                     | 0.0468 | 0.0266 | 1.38  | 2.11  | -2.70 |
| 252367_at | At3g48360 | Speckle-Type Poz Protein-Related                          | 0.0485 | 0.0420 | -4.17 | -1.35 | 1.09  |
| 251956_at | At3g53460 | RNA-Binding Protein; Cp 29                                | 0.0493 | 0.0462 | -1.56 | -2.86 | 1.10  |
| 255149_at | At4g08150 | Homeobox Protein Knotted-1 Like 1 (Knat1)                 | 0.0447 | 0.0186 | -9.21 | 1.73  | -2.63 |
| 253853_at | At4g28130 | Diacylglycerol Kinase Accessory Domain-Containing Protein | 0.0495 | 0.0485 | 1.38  | -3.41 | 1.21  |
| 252994_at | At4g38480 | Transducin Family Protein / Wd-40 Repeat Family Protein   | 0.0445 | 0.0154 | -7.24 | -2.56 | 1.40  |

#### H. Protein fate

|           |           |                                              |        |        |       |       |        |
|-----------|-----------|----------------------------------------------|--------|--------|-------|-------|--------|
| 261241_at | At1g32950 | Subtilase Family Protein                     | 0.0397 | 0.0034 | 1.40  | -4.17 | 2.25   |
| 264966_at | At1g60570 | Kelch Repeat-Containing F-Box Family Protein | 0.0434 | 0.0096 | -2.50 | 1.09  | 1.96   |
| 262333_at | At1g64020 | Serine Protease Inhibitor-Related            | 0.0475 | 0.0372 | 1.11  | -4.76 | -1.47  |
| 258670_at | At3g08810 | Kelch Repeat-Containing F-Box Family Protein | 0.0425 | 0.0080 | -4.74 | 1.11  | 1.58   |
| 258407_at | At3g17620 | F-Box Family Protein                         | 0.0475 | 0.0335 | 1.72  | -1.33 | -3.23  |
| 251512_at | At3g59190 | F-Box Family Protein                         | 0.0475 | 0.0359 | -1.12 | 2.31  | -3.85  |
| 254875_at | At4g11590 | F-Box Family Protein                         | 0.0448 | 0.0191 | 2.43  | -4.95 | -10.60 |

|           |           |                    |        |        |       |      |        |
|-----------|-----------|--------------------|--------|--------|-------|------|--------|
| 248062_at | At5g55450 | Protease Inhibitor | 0.0445 | 0.0138 | -1.24 | 1.00 | -15.26 |
|-----------|-----------|--------------------|--------|--------|-------|------|--------|

#### I. Transcription/splicing/RNA processing

|           |           |                                                     |        |        |       |        |       |
|-----------|-----------|-----------------------------------------------------|--------|--------|-------|--------|-------|
| 256023_at | At1g58330 | Transcription Factor-Related                        | 0.0488 | 0.0442 | -4.12 | 1.13   | -1.08 |
| 260263_at | At1g68480 | Zinc Finger (C2H2 Type) Family Protein              | 0.0445 | 0.0175 | 1.58  | -3.03  | 2.44  |
| 263281_at | At2g14160 | RNA Recognition Motif (Rrm)-Containing Protein      | 0.0445 | 0.0174 | -1.93 | -14.45 | -2.86 |
| 263092_at | At2g16210 | Transcriptional Factor B3 Family Protein            | 0.0475 | 0.0319 | 1.31  | -3.87  | 1.58  |
| 267091_at | At2g38185 | Zinc Finger (C3Hc4-Type Ring Finger) Family Protein | 0.0448 | 0.0197 | 1.56  | -4.55  | 1.47  |
| 266886_at | At2g44745 | Wrky Family Transcription Factor                    | 0.0466 | 0.0249 | 2.49  | -4.55  | -1.09 |
| 257656_at | At3g13228 | Zinc Finger (C3Hc4-Type Ring Finger) Family Protein | 0.0474 | 0.0309 | -1.51 | 2.08   | -7.82 |
| 257740_at | At3g27330 | Zinc Finger (C3Hc4-Type Ring Finger) Family Protein | 0.0475 | 0.0372 | -6.25 | 1.26   | 1.78  |
| 246274_at | At4g36620 | Zinc Finger (Gata Type) Family Protein              | 0.0475 | 0.0372 | -3.81 | -5.85  | 2.10  |
| 246520_at | At5g15790 | Zinc Finger (C3Hc4-Type Ring Finger) Family Protein | 0.0475 | 0.0375 | -4.00 | 1.74   | 1.27  |
| 249606_at | At5g37260 | Myb Family Transcription Factor                     | 0.0407 | 0.0055 | -1.64 | -2.86  | -1.04 |
| 248859_at | At5g46660 | CHP-Rich Zinc Finger Protein, Putative              | 0.0474 | 0.0308 | -6.67 | -1.41  | -1.32 |
| 247035_at | At5g67110 | Basic Helix-Loop-Helix (BHLH) Family Protein        | 0.0473 | 0.0282 | -1.30 | -4.00  | -2.08 |

#### II. Helicase activity

|           |           |                                  |        |        |        |       |       |
|-----------|-----------|----------------------------------|--------|--------|--------|-------|-------|
| 246734_at | At5g27680 | Dead/Deah Box Helicase, Putative | 0.0475 | 0.0334 | 1.94   | -4.76 | 1.37  |
| 252840_at | At5g32630 | Putative Helicase                | 0.0445 | 0.0148 | -10.00 | 1.06  | -1.14 |

#### J. Transporters

|           |           |                                                              |        |        |       |       |       |
|-----------|-----------|--------------------------------------------------------------|--------|--------|-------|-------|-------|
| 260193_at | At1g67640 | Lysine And Histidine Specific Transporter, Putative          | 0.0453 | 0.0208 | -3.98 | -6.83 | -1.43 |
| 259846_at | At1g72140 | Proton-Dependent Oligopeptide Transport (Pot) Family Protein | 0.0493 | 0.0466 | 1.23  | -4.35 | 2.33  |
| 265955_at | At2g37280 | Abc Transporter Family Protein                               | 0.0465 | 0.0241 | -3.57 | -1.11 | 1.34  |
| 255359_at | At4g03950 | Glucose-6-Phosphate/Phosphate Translocator, Putative         | 0.0390 | 0.0017 | -9.89 | 2.14  | 1.72  |

#### K. Transposable elements, viral and plasmid proteins

|             |           |                                             |        |        |        |        |        |
|-------------|-----------|---------------------------------------------|--------|--------|--------|--------|--------|
| 262031_x_at | At1g37160 | Gypsy-Like Retrotransposon Family (Athila)  | 0.0475 | 0.0351 | -2.38  | -3.85  | 1.70   |
| 266213_s_at | At2g06870 | Mutator-Like Transposase Family             | 0.0441 | 0.0109 | -1.22  | -2.87  | 1.55   |
| 265783_at   | At2g07450 | Gypsy-Like Retrotransposon Family (Athila)  | 0.0405 | 0.0048 | -12.50 | 1.32   | 1.18   |
| 263508_s_at | At2g07685 | Gypsy-Like Retrotransposon Family (Athila)  | 0.0482 | 0.0411 | 1.58   | 1.80   | -7.14  |
| 263389_at   | At2g11680 | Gypsy-Like Retrotransposon Family           | 0.0466 | 0.0257 | -5.00  | 1.21   | 2.00   |
| 266148_x_at | At2g12240 | Cacta-Like Transposase Family (Ptta/En/Spm) | 0.0475 | 0.0335 | 1.49   | -5.88  | -1.15  |
| 264104_at   | At2g13750 | Cacta-Like Transposase Family (Ptta/En/Spm) | 0.0492 | 0.0454 | 1.40   | -12.50 | -2.27  |
| 256845_x_at | At3g31970 | Gypsy-Like Retrotransposon Family           | 0.0476 | 0.0387 | -1.15  | -2.63  | -1.41  |
| 255374_at   | At4g03770 | Gypsy-Like Retrotransposon Family (Athila)  | 0.0474 | 0.0288 | -6.01  | 1.43   | -3.52  |
| 255316_at   | At4g04170 | Cacta-Like Transposase Family (Ptta/En/Spm) | 0.0390 | 0.0015 | 1.95   | -1.47  | -14.29 |
| 255188_at   | At4g07340 | Replication Protein-Related                 | 0.0401 | 0.0043 | 2.34   | -10.28 | -1.28  |
| 255215_at   | At4g07660 | Gypsy-Like Retrotransposon Family (Athila)  | 0.0474 | 0.0311 | 1.35   | -2.22  | -9.09  |
| 255156_at   | At4g07780 | Gypsy-Like Retrotransposon Family (Athila)  | 0.0441 | 0.0106 | 1.61   | 2.42   | -18.75 |
| 246667_at   | At5g34840 | Mutator-Like Transposase Family             | 0.0465 | 0.0242 | -1.55  | -7.45  | 1.06   |

#### L. Unknown proteins

|             |           |                      |        |        |        |        |        |
|-------------|-----------|----------------------|--------|--------|--------|--------|--------|
| 262625_at   | At1g06440 | Expressed Protein    | 0.0465 | 0.0239 | -1.32  | -5.56  | 1.33   |
| 259566_at   | At1g20520 | Expressed Protein    | 0.0441 | 0.0116 | -7.14  | 1.30   | -2.50  |
| 261645_at   | At1g27790 | Hypothetical Protein | 0.0494 | 0.0475 | 1.53   | -14.30 | 1.09   |
| 260715_at   | At1g48200 | Expressed Protein    | 0.0445 | 0.0143 | -3.85  | 1.53   | 1.57   |
| 263738_at   | At1g60060 | Expressed Protein    | 0.0441 | 0.0105 | 1.11   | 1.25   | -5.56  |
| 260198_at   | At1g67635 | Expressed Protein    | 0.0496 | 0.0493 | 2.02   | -2.78  | -5.66  |
| 259870_at   | At1g76780 | Expressed Protein    | 0.0441 | 0.0106 | -2.27  | 1.67   | -16.67 |
| 267479_at   | At2g02690 | Expressed Protein    | 0.0401 | 0.0044 | 1.05   | 1.61   | -6.24  |
| 266733_at   | At2g03280 | Expressed Protein    | 0.0390 | 0.0032 | 2.25   | 1.31   | -2.70  |
| 265746_at   | At2g06630 | Hypothetical Protein | 0.0445 | 0.0142 | 1.19   | 1.22   | -40.97 |
| 265745_at   | At2g06640 | Unknown Protein      | 0.0493 | 0.0464 | -3.56  | 1.30   | -1.42  |
| 265421_s_at | At2g20616 | Expressed Protein    | 0.0482 | 0.0413 | -1.10  | -5.56  | 1.92   |
| 266251_s_at | At2g27540 | Expressed Protein    | 0.0460 | 0.0227 | -14.29 | 1.31   | 1.04   |
| 267166_at   | At2g37720 | Expressed Protein    | 0.0441 | 0.0128 | 1.21   | -4.76  | 1.56   |
| 263498_at   | At2g42610 | Expressed Protein    | 0.0447 | 0.0184 | 1.34   | 1.98   | -3.70  |
| 266754_at   | At2g46980 | Expressed Protein    | 0.0425 | 0.0079 | 1.97   | -3.03  | 2.18   |
| 256599_at   | At3g14760 | Expressed Protein    | 0.0441 | 0.0108 | -1.04  | -2.78  | 2.06   |
| 257111_x_at | At3g30450 | Hypothetical Protein | 0.0455 | 0.0216 | -9.09  | 2.07   | 1.17   |

|             |           |                      |        |        |       |        |       |
|-------------|-----------|----------------------|--------|--------|-------|--------|-------|
| 252784_at   | At3g43040 | Unknown Protein      | 0.0475 | 0.0333 | 2.02  | -8.33  | 1.66  |
| 246341_x_at | At3g43150 | Hypothetical Protein | 0.0474 | 0.0292 | -2.13 | -3.45  | 1.74  |
| 252741_at   | At3g43280 | Expressed Protein    | 0.0473 | 0.0279 | -4.35 | 2.15   | 1.46  |
| 252665_at   | At3g44140 | Expressed Protein    | 0.0449 | 0.0203 | 1.06  | -3.13  | 1.09  |
| 252196_at   | At3g50200 | Expressed Protein    | 0.0494 | 0.0474 | -3.68 | -1.67  | 2.00  |
| 255531_at   | At4g02160 | Hypothetical Protein | 0.0390 | 0.0024 | -1.16 | -10.00 | 1.81  |
| 255348_at   | At4g03820 | Expressed Protein    | 0.0474 | 0.0295 | 1.36  | -3.70  | 1.58  |
| 255029_x_at | At4g09470 | Expressed Protein    | 0.0465 | 0.0243 | 1.43  | -1.60  | -3.65 |
| 254908_at   | At4g11200 | Expressed Protein    | 0.0474 | 0.0298 | -3.03 | 1.88   | 1.87  |
| 254825_at   | At4g12630 | Unknown Protein      | 0.0390 | 0.0030 | 1.95  | 1.64   | -8.62 |
| 254769_at   | At4g13330 | Expressed Protein    | 0.0474 | 0.0294 | 1.76  | -2.86  | 1.32  |
| 264461_s_at | At4g15050 | Expressed Protein    | 0.0466 | 0.0261 | 2.49  | 1.38   | -9.09 |
| 254311_at   | At4g22440 | Hypothetical Protein | 0.0466 | 0.0256 | 2.00  | 2.22   | -5.56 |
| 254240_at   | At4g23496 | Expressed Protein    | 0.0478 | 0.0394 | 1.58  | -3.73  | 1.20  |
| 254138_at   | At4g24950 | Expressed Protein    | 0.0435 | 0.0101 | -5.56 | 1.73   | 1.26  |
| 253518_at   | At4g31400 | Expressed Protein    | 0.0475 | 0.0353 | -3.37 | 1.24   | -1.64 |
| 251003_at   | At5g02690 | Expressed Protein    | 0.0465 | 0.0244 | 1.67  | -2.56  | -1.25 |
| 250945_at   | At5g03400 | Hypothetical Protein | 0.0478 | 0.0394 | 1.99  | 1.66   | -6.76 |
| 250300_at   | At5g11890 | Expressed Protein    | 0.0475 | 0.0336 | -5.88 | 1.82   | -1.52 |
| 246795_at   | At5g27020 | Hypothetical Protein | 0.0475 | 0.0332 | 1.66  | 1.41   | -6.61 |
| 246605_at   | At5g35340 | Unknown Protein      | 0.0465 | 0.0246 | -1.61 | 2.34   | -5.00 |
| 249531_at   | At5g38770 | Hypothetical Protein | 0.0447 | 0.0185 | 1.28  | -8.76  | 2.30  |
| 248904_at   | At5g46295 | Expressed Protein    | 0.0445 | 0.0169 | 1.53  | 1.94   | -3.08 |
| 248282_at   | At5g52900 | Expressed Protein    | 0.0475 | 0.0371 | 1.05  | 1.26   | -3.45 |
| 247883_at   | At5g57790 | Expressed Protein    | 0.0390 | 0.0032 | 1.82  | 1.88   | -3.73 |

### III. Genes induced and repressed in PPV-infected *Arabidopsis* protoplasts at different time points

#### A. Defence and virulence

|             |           |                                                        |        |        |       |       |       |
|-------------|-----------|--------------------------------------------------------|--------|--------|-------|-------|-------|
| 261737_at   | At1g47885 | Disease Resistance Protein, Putative                   | 0.0460 | 0.0228 | 2.81  | -6.67 | 2.21  |
| 260514_at   | At1g51480 | Disease Resistance Protein, CC-NBS-LRR class, Putative | 0.0482 | 0.0406 | -1.02 | 5.48  | -6.25 |
| 260052_at   | At1g78220 | 14-3-3 Protein Gf14 Pi; Grf13                          | 0.0414 | 0.0065 | 2.81  | -6.67 | 1.41  |
| 266562_at   | At2g23970 | Defense-Related Protein, Putative                      | 0.0495 | 0.0485 | 1.66  | 4.23  | -3.45 |
| 260584_at   | At2g43660 | b-1,3-Glucanase, Putative                              | 0.0434 | 0.0093 | -1.07 | -7.84 | 4.60  |
| 254905_at   | At4g11170 | Disease Resistance Protein, TIR-NBS-LRR, Putative      | 0.0498 | 0.0497 | -1.06 | 2.65  | -3.13 |
| 246096_at   | At5g20330 | b-1,3-Glucanase; Bg4                                   | 0.0407 | 0.0055 | 2.29  | 5.53  | -6.25 |
| 249477_s_at | At5g38930 | Germin-Like Protein, Putative                          | 0.0475 | 0.0319 | 7.80  | -1.85 | -2.50 |

#### A2. Cell wall associated transcripts

##### A2.1. Re-assembly of cell wall associated genes

|             |           |                                                                |        |        |       |        |       |
|-------------|-----------|----------------------------------------------------------------|--------|--------|-------|--------|-------|
| 264898_at   | At1g23205 | Invertase/Pectin Methylesterase Inhibitor Family Protein       | 0.0441 | 0.0122 | 2.86  | 1.83   | -2.86 |
| 257441_at   | At2g04020 | Gdsl-Motif Lipase/Hydrolase Family Protein                     | 0.0441 | 0.0113 | 2.36  | 2.96   | -5.39 |
| 260573_at   | At2g47280 | Pectinesterase Family Protein                                  | 0.0474 | 0.0303 | -1.27 | -11.11 | 4.37  |
| 258147_at   | At3g18070 | Glycosyl Hydrolase Family 1 Protein                            | 0.0438 | 0.0127 | 3.06  | 1.25   | -9.70 |
| 257629_at   | At3g26140 | Glycosyl Hydrolase Family 5 Protein / Cellulase Family Protein | 0.0482 | 0.0414 | 1.09  | -4.73  | 2.57  |
| 252756_s_at | At3g43550 | Gdsl-Motif Lipase, Putative                                    | 0.0405 | 0.0050 | -1.06 | -4.17  | 14.58 |
| 251748_at   | At3g55680 | Invertase/Pectin Methylesterase Inhibitor Family Protein       | 0.0475 | 0.0320 | -5.85 | -2.19  | 3.96  |
| 254959_at   | At4g10955 | Lipase Class 3 Family Protein                                  | 0.0445 | 0.0137 | 4.74  | -2.08  | -5.56 |
| 252930_at   | At4g39010 | Glycosyl Hydrolase Family 9 Protein                            | 0.0473 | 0.0279 | -3.45 | 1.04   | 2.59  |
| 250801_at   | At5g04960 | Pectinesterase Family Protein                                  | 0.0475 | 0.0331 | -2.50 | 5.98   | 1.09  |
| 245849_at   | At5g13520 | Hydrolase-Like Protein                                         | 0.0475 | 0.0376 | -1.56 | -3.13  | 4.35  |

##### A2.3. Structural proteins

|           |           |                                                 |        |        |      |       |       |
|-----------|-----------|-------------------------------------------------|--------|--------|------|-------|-------|
| 250174_at | At5g14380 | Arabinogalactan-Protein, Agp6                   | 0.0466 | 0.0258 | 7.52 | -2.70 | 1.52  |
| 245655_at | At1g56530 | Hydroxyproline-Rich Glycoprotein Family Protein | 0.0434 | 0.0091 | 7.94 | -2.50 | -6.67 |

#### B. Cellular communication/Signal transduction mechanism/transmembrane signal transduction

|           |           |                                        |        |        |       |       |       |
|-----------|-----------|----------------------------------------|--------|--------|-------|-------|-------|
| 264369_at | At1g70430 | Ste-20 Kinase Spak, Putative           | 0.0495 | 0.0485 | 4.37  | -1.92 | -5.88 |
| 260061_at | At1g73690 | Cell Division Protein Kinase, Putative | 0.0475 | 0.0345 | 1.12  | 4.45  | -5.26 |
| 260161_at | At1g79860 | Kinase Partner Protein-Like            | 0.0474 | 0.0219 | 4.92  | 2.32  | -4.17 |
| 265410_at | At2g16620 | Protein Kinase-Related                 | 0.0495 | 0.0485 | -1.85 | 3.41  | -5.56 |
| 257233_at | At3g15050 | Calmodulin-Binding Family Protein      | 0.0445 | 0.0145 | 2.70  | -5.88 | -1.85 |
| 257229_at | At3g16490 | Calmodulin-Binding Family Protein      | 0.0495 | 0.0485 | 4.01  | -8.62 | 2.48  |

|                                                                                    |           |                                                                   |        |        |        |        |        |
|------------------------------------------------------------------------------------|-----------|-------------------------------------------------------------------|--------|--------|--------|--------|--------|
| 257261_s_at                                                                        | At3g21930 | Receptor-Like Protein Kinase-Related                              | 0.0454 | 0.0214 | -1.67  | 4.12   | -3.03  |
| 255757_at                                                                          | At4g00460 | Kinase Partner Protein-Like                                       | 0.0481 | 0.0306 | 2.25   | 3.31   | -3.23  |
| 250443_at                                                                          | At5g10520 | Protein Kinase Family Protein                                     | 0.0441 | 0.0119 | 1.95   | 3.51   | -4.55  |
| 247962_at                                                                          | At5g56580 | Mitogen-Activated Protein Kinase Kinase, Putative                 | 0.0471 | 0.0277 | 2.78   | -1.27  | -3.45  |
| 247776_at                                                                          | At5g58700 | Phospholipase C                                                   | 0.0465 | 0.0247 | 1.41   | -5.26  | 2.64   |
| C. Cell Cycle/ DNA processing/chromatin regulation and cytoskeleton reorganization |           |                                                                   |        |        |        |        |        |
| 259962_at                                                                          | At1g53690 | Dna-Directed RNA Polymerases I, Ii, And Iii Putative              | 0.0390 | 0.0033 | 10.13  | -4.00  | 2.38   |
| 263751_at                                                                          | At2g21300 | Kinesin Motor Family Protein                                      | 0.0390 | 0.0031 | -1.20  | -2.94  | 5.21   |
| 252428_at                                                                          | At3g47660 | Regulator Of Chromosome Condensation (Rcc1) Protein               | 0.0466 | 0.0252 | -3.49  | 3.14   | 1.27   |
| 254205_at                                                                          | At4g24170 | Kinesin Motor Family Protein                                      | 0.0425 | 0.0078 | 10.70  | -2.63  | 1.18   |
| 250997_at                                                                          | At5g02570 | Histone H2B, Putative                                             | 0.0390 | 0.0028 | 1.44   | -7.69  | 3.22   |
| 250433_at                                                                          | At5g10400 | Histone H3                                                        | 0.0464 | 0.0235 | 1.81   | 3.40   | -11.11 |
| D. Development/storage proteins                                                    |           |                                                                   |        |        |        |        |        |
| 245658_at                                                                          | At1g28270 | Rapid Alkalinization Factor (Ralf) Family Protein                 | 0.0473 | 0.0341 | -1.39  | -3.22  | 2.81   |
| 260346_at                                                                          | At1g69320 | Cle10, Putative                                                   | 0.0494 | 0.0439 | 2.85   | 1.33   | -2.63  |
| 266531_at                                                                          | At2g16835 | Water Channel Protein, Putative                                   | 0.0405 | 0.0046 | -5.00  | 7.66   | 1.66   |
| 265949_at                                                                          | At2g18540 | Cupin Family Protein                                              | 0.0494 | 0.0470 | -1.25  | 6.88   | -5.00  |
| 258082_at                                                                          | At3g25905 | Cle27, Putative                                                   | 0.0450 | 0.0322 | -4.10  | 3.22   | -4.82  |
| 252364_at                                                                          | At3g48450 | Nitrate-Responsive Noi Protein, Putative                          | 0.0475 | 0.0373 | 1.47   | 3.37   | -5.00  |
| 245267_at                                                                          | At4g14060 | Major Latex Protein-Related / Mlp-Related                         | 0.0407 | 0.0054 | 2.66   | -6.08  | -1.76  |
| 250579_at                                                                          | At5g07930 | Terminal Ear1 Protein, Putative                                   | 0.0458 | 0.0224 | 6.35   | -2.78  | -1.64  |
| 250474_at                                                                          | At5g10230 | Annexin 7; Ann7                                                   | 0.0428 | 0.0083 | -1.43  | 4.16   | -5.00  |
| 248112_at                                                                          | At5g55350 | Wax Synthase-Like Protein                                         | 0.0441 | 0.0111 | -1.96  | 7.13   | -3.85  |
| E. Metabolism/energy/membrane associated proteins                                  |           |                                                                   |        |        |        |        |        |
| E1. Carbohydrate/soluble sugar/starch/aminoacid metabolism                         |           |                                                                   |        |        |        |        |        |
| 253066_at                                                                          | At4g37770 | 1-Aminocyclopropane-1-Carboxylate Synthase, Putative              | 0.0482 | 0.0414 | -2.54  | 2.87   | -8.84  |
| E2. Primary /secondary metabolism                                                  |           |                                                                   |        |        |        |        |        |
| 259388_at                                                                          | At1g13420 | Sulfotransferase Family Protein                                   | 0.0494 | 0.0474 | -4.42  | 3.70   | -3.30  |
| 259696_at                                                                          | At1g63150 | Pentatricopeptide (Ppr) Repeat-Containing Protein                 | 0.0445 | 0.0136 | -3.85  | -1.82  | 5.55   |
| 256375_at                                                                          | At1g66720 | S-Adenosyl-L-Methionine:Carboxyl Methyltransferase Family Protein | 0.0475 | 0.0319 | 6.18   | -1.28  | -2.86  |
| 263068_at                                                                          | At2g17580 | Polynucleotide Adenylyltransferase Family Protein                 | 0.0447 | 0.0183 | -3.03  | -1.61  | 3.68   |
| 267094_at                                                                          | At2g38080 | Diphenol Oxidase, Putative                                        | 0.0485 | 0.0422 | 1.16   | 6.26   | -3.85  |
| 266875_at                                                                          | At2g44800 | Oxidoreductase, 2Og-Fe(Ii) Oxygenase Family Protein               | 0.0445 | 0.0172 | 3.93   | -1.10  | -5.30  |
| 258121_s_at                                                                        | At3g14530 | Geranylgeranyl Pyrophosphate Synthase, Putative                   | 0.0448 | 0.0195 | -1.79  | 5.64   | -5.26  |
| 257143_at                                                                          | At3g20110 | Cytochrome P450 Family Protein                                    | 0.0441 | 0.0120 | 1.34   | 4.49   | -5.00  |
| 245508_at                                                                          | At4g15720 | Pentatricopeptide (Ppr) Repeat-Containing Protein                 | 0.0397 | 0.0038 | -1.45  | -4.00  | 3.71   |
| 254513_at                                                                          | At4g20240 | Cytochrome P450, Putative (Metabolism)                            | 0.0488 | 0.0443 | -1.72  | 2.73   | -2.70  |
| 253502_at                                                                          | At4g31940 | Cytochrome P450, Putative                                         | 0.0405 | 0.0046 | -14.29 | 6.81   | -2.17  |
| 250783_at                                                                          | At5g05260 | Cytochrome P450 (Metabolism)                                      | 0.0407 | 0.0055 | 3.17   | 1.03   | -2.55  |
| 246970_at                                                                          | At5g24900 | Cytochrome P450 Family Protein                                    | 0.0407 | 0.0056 | -2.78  | 7.01   | -1.22  |
| 249484_at                                                                          | At5g38970 | Cytochrome P450, Putative (Metabolism)                            | 0.0390 | 0.0022 | -1.22  | -4.66  | 6.39   |
| 248013_at                                                                          | At5g56330 | Carbonic Anhydrase Family Protein                                 | 0.0474 | 0.0307 | 1.20   | 4.97   | -2.70  |
| E3. Intracellular membrane/membrane bound                                          |           |                                                                   |        |        |        |        |        |
| 264842_at                                                                          | At1g03700 | Integral Membrane Family Protein                                  | 0.0390 | 0.0025 | 4.38   | -3.95  | -2.56  |
| 255258_at                                                                          | At4g05060 | Vesicle Associated Membrane Family Protein                        | 0.0445 | 0.0174 | 1.10   | 5.13   | -3.48  |
| F. Proteins with binding function or cofactor requirement                          |           |                                                                   |        |        |        |        |        |
| 261435_at                                                                          | At1g07620 | Gtp-Binding Protein, Putative                                     | 0.0447 | 0.0183 | 3.52   | -11.11 | 1.13   |
| 264562_at                                                                          | At1g55760 | Btb/Poz Domain-Containing Protein                                 | 0.0445 | 0.0162 | -1.56  | 5.89   | -5.00  |
| 266730_at                                                                          | At2g03110 | RNA binding Protein, Putative                                     | 0.0475 | 0.0329 | -1.89  | 3.52   | -3.86  |
| 257397_at                                                                          | At2g20430 | P21-Rho-Binding Domain Protein                                    | 0.0459 | 0.0225 | 4.40   | -1.56  | -3.33  |
| 259324_at                                                                          | At3g05310 | Gtp-Binding Protein-Related                                       | 0.0475 | 0.0315 | 2.38   | 2.81   | -4.35  |
| 257531_at                                                                          | At3g07240 | RNA binding Protein, Putative                                     | 0.0497 | 0.0495 | -1.03  | 3.24   | -5.56  |
| 258068_at                                                                          | At3g25990 | Dna-Binding Protein Gt-1-Related                                  | 0.0471 | 0.0274 | 1.21   | 6.32   | -2.86  |
| 258028_at                                                                          | At3g27473 | Dc1 Domain-Containing Protein                                     | 0.0479 | 0.0397 | 3.61   | -3.70  | -1.39  |
| 254771_at                                                                          | At4g13380 | Heavy-Metal-Associated Domain-Containing Protein                  | 0.0475 | 0.0378 | 6.90   | -4.00  | 1.34   |
| 245538_at                                                                          | At4g15200 | Fh2 Domain Containing Protein                                     | 0.0434 | 0.0097 | -1.32  | 4.26   | -6.15  |

|                                                      |           |                                                         |        |        |        |        |       |  |
|------------------------------------------------------|-----------|---------------------------------------------------------|--------|--------|--------|--------|-------|--|
| 246963_at                                            | At5g24820 | Dna-Binding Protein Cnd41, Putative                     | 0.0468 | 0.0267 | 3.27   | -3.03  | -1.05 |  |
| 249571_at                                            | At5g37620 | Dc1 Domain-Containing Protein                           | 0.0390 | 0.0025 | 2.81   | -4.76  | -1.22 |  |
| 247941_at                                            | At5g57200 | Enth Domain-Containing Protein                          | 0.0461 | 0.0230 | 2.82   | -11.11 | 2.00  |  |
| G. Protein synthesis and translation                 |           |                                                         |        |        |        |        |       |  |
| 252259_at                                            | At3g49460 | 60S Acidic Ribosomal Protein-Related                    | 0.0466 | 0.0256 | 1.38   | -6.17  | 2.83  |  |
| H. Protein fate                                      |           |                                                         |        |        |        |        |       |  |
| 260891_at                                            | At1g29080 | Cysteine Protease, Spc1                                 | 0.0475 | 0.0348 | 10.06  | 2.38   | -5.00 |  |
| 256496_at                                            | At1g31510 | F-Box Family Protein-Related                            | 0.0397 | 0.0038 | -5.56  | 5.22   | -2.13 |  |
| 263245_at                                            | At2g31470 | F-Box Family Protein                                    | 0.0485 | 0.0422 | 2.29   | 8.79   | -2.78 |  |
| 255256_at                                            | At4g05080 | F-Box Family Protein                                    | 0.0497 | 0.0496 | -2.12  | 4.89   | -5.53 |  |
| I. Transcription/splicing/RNA processing             |           |                                                         |        |        |        |        |       |  |
| 264786_at                                            | At2g17920 | Zinc Finger Protein                                     | 0.0445 | 0.0145 | 1.86   | 6.88   | -3.33 |  |
| 267167_at                                            | At2g37740 | Zinc Finger (C2H2 Type) Family Protein                  | 0.0474 | 0.0302 | 2.79   | 1.54   | -7.25 |  |
| 258734_at                                            | At3g05860 | Mads-Box Protein (Agl45)                                | 0.0474 | 0.0299 | 3.63   | -1.41  | -2.70 |  |
| 256395_at                                            | At3g06120 | Basic Helix-Loop-Helix (BHLH) Family Protein            | 0.0397 | 0.0035 | 2.75   | -8.17  | -1.53 |  |
| 252578_at                                            | At3g45480 | Zinc Finger (C3Hc4-Type Ring Finger) Family Protein     | 0.0475 | 0.0318 | 3.10   | -4.35  | 2.27  |  |
| 254855_s_at                                          | At4g12140 | Zinc Finger (C3Hc4-Type Ring Finger) Family Protein     | 0.0405 | 0.0050 | 2.58   | -4.61  | -2.84 |  |
| 245707_at                                            | At5g04400 | Nac2-Like Protein                                       | 0.0494 | 0.0470 | 3.08   | -3.23  | -1.33 |  |
| 246798_at                                            | At5g26930 | Zinc Finger (Gata Type) Family Protein                  | 0.0441 | 0.0113 | -10.00 | 4.89   | 1.23  |  |
| 246790_at                                            | At5g27610 | Myb Family Transcription Factor                         | 0.0453 | 0.0210 | -5.26  | -1.04  | 3.43  |  |
| 248212_at                                            | At5g54020 | Zinc Finger Protein-Like, Chp Type                      | 0.0441 | 0.0127 | 3.09   | -2.78  | 1.18  |  |
| 248188_at                                            | At5g54070 | Heat Shock Transcription Factor Family Protein          | 0.0468 | 0.0267 | -2.94  | 5.72   | 1.36  |  |
| II. Helicase activity                                |           |                                                         |        |        |        |        |       |  |
| 260463_at                                            | At1g10930 | Helicase                                                | 0.0495 | 0.0483 | -4.17  | 1.68   | 2.89  |  |
| 261343_s_at                                          | At3g43350 | Helicase-Related                                        | 0.0445 | 0.0160 | 1.39   | -10.00 | 3.17  |  |
| I2. RNA metabolism                                   |           |                                                         |        |        |        |        |       |  |
| 256120_at                                            | At1g18130 | TRNA Synthetase-Related -Related                        | 0.0475 | 0.0252 | -2.72  | 8.78   | -2.99 |  |
| J. Transporters                                      |           |                                                         |        |        |        |        |       |  |
| 259810_at                                            | At1g49810 | Na <sup>+</sup> /H <sup>+</sup> Antiporter, Putative    | 0.0390 | 0.0013 | 1.05   | 3.68   | -3.85 |  |
| 246338_s_at                                          | At3g44930 | Cation/Hydrogen Exchanger, Putative (Chx10)             | 0.0466 | 0.0253 | 4.13   | 2.42   | -3.45 |  |
| 249884_at                                            | At5g22910 | Na <sup>+</sup> /H <sup>+</sup> Antiporter-Like Protein | 0.0475 | 0.0316 | -3.81  | 3.65   | -3.64 |  |
| K. Transposable elements, viral and plasmid proteins |           |                                                         |        |        |        |        |       |  |
| 265004_at                                            | At1g26990 | Copia-Like Retrotransposon Family                       | 0.0448 | 0.0192 | 3.36   | -4.04  | -1.95 |  |
| 262035_at                                            | At1g37110 | Copia-Like Retrotransposon Family                       | 0.0475 | 0.0359 | -3.33  | 5.46   | 1.80  |  |
| 259988_at                                            | At1g41797 | Athila Orf 1, Putative                                  | 0.0441 | 0.0108 | 8.03   | -10.06 | -8.32 |  |
| 263746_at                                            | At2g21460 | Copia-Like Retrotransposon Family                       | 0.0448 | 0.0198 | -2.95  | 8.04   | -2.09 |  |
| 266470_at                                            | At2g31080 | Non-Ltr Retrotransposon Family (Line)                   | 0.0445 | 0.0162 | -1.20  | -5.00  | 5.05  |  |
| 255463_at                                            | At4g02960 | Copia-Like Retrotransposon Family                       | 0.0445 | 0.0163 | 7.56   | -5.19  | -1.94 |  |
| 266586_s_at                                          | At4g08060 | Acta-Like Transposase Family (Tnp1/En/Spm)              | 0.0388 | 0.0005 | -5.00  | 8.51   | -2.22 |  |
| L. Unknown proteins                                  |           |                                                         |        |        |        |        |       |  |
| 261573_at                                            | At1g01180 | Expressed Protein                                       | 0.0476 | 0.0475 | 4.25   | -2.63  | -3.24 |  |
| 263027_at                                            | At1g24010 | Expressed Protein                                       | 0.0405 | 0.0049 | 1.77   | 8.86   | -9.09 |  |
| 245646_s_at                                          | At1g25025 | Expressed Protein                                       | 0.0409 | 0.0176 | -5.26  | 7.78   | -1.59 |  |
| 246353_s_at                                          | At1g39190 | Unknown Protein                                         | 0.0485 | 0.0388 | 1.03   | -5.26  | 3.07  |  |
| 246365_at                                            | At1g39750 | Unknown Protein                                         | 0.0434 | 0.0062 | -4.76  | 2.20   | 3.18  |  |
| 256175_at                                            | At1g51670 | Expressed Protein                                       | 0.0475 | 0.0374 | 10.29  | 1.53   | -3.13 |  |
| 264735_s_at                                          | At1g62060 | Expressed Protein                                       | 0.0475 | 0.0460 | 1.76   | -2.96  | 2.68  |  |
| 255853_at                                            | At1g67020 | Hypothetical Protein                                    | 0.0477 | 0.0477 | -1.89  | -3.03  | 7.37  |  |
| 261779_at                                            | At1g76230 | Expressed Protein                                       | 0.0494 | 0.0431 | -1.04  | 4.80   | -3.85 |  |
| 263055_at                                            | At2g04600 | Expressed Protein                                       | 0.0401 | 0.0041 | -20.00 | 4.48   | -1.30 |  |
| 263672_at                                            | At2g04820 | Unknown Protein                                         | 0.0405 | 0.0048 | -3.70  | 8.74   | -2.17 |  |
| 263337_at                                            | At2g04990 | Unknown Protein                                         | 0.0471 | 0.0339 | -2.91  | 2.80   | -3.24 |  |
| 265655_at                                            | At2g13920 | Unknown Protein                                         | 0.0485 | 0.0391 | 2.43   | -5.92  | 7.37  |  |
| 263094_at                                            | At2g16020 | Hypothetical Protein                                    | 0.0475 | 0.0262 | 3.04   | -4.20  | -3.95 |  |



|             |           |                      |        |        |       |       |        |
|-------------|-----------|----------------------|--------|--------|-------|-------|--------|
| 267491_at   | At2g19140 | Unknown Protein      | 0.0488 | 0.0312 | 3.27  | -1.39 | -3.33  |
| 257367_at   | At2g25780 | Hypothetical Protein | 0.0390 | 0.0016 | 3.92  | -5.26 | -1.49  |
| 266894_at   | At2g26050 | Expressed Protein    | 0.0466 | 0.0330 | -2.93 | 4.17  | -4.14  |
| 263781_at   | At2g46360 | Expressed Protein    | 0.0445 | 0.0159 | 2.19  | 7.61  | -2.70  |
| 258442_at   | At3g01015 | Expressed Protein    | 0.0475 | 0.0365 | -7.14 | 1.78  | 3.50   |
| 258955_s_at | At3g01450 | Expressed Protein    | 0.0480 | 0.0302 | 4.48  | 1.86  | -6.67  |
| 256436_at   | At3g11150 | Expressed Protein    | 0.0441 | 0.0113 | -3.10 | 5.85  | 1.04   |
| 257308_at   | At3g28120 | Expressed Protein    | 0.0482 | 0.0380 | -3.49 | -2.60 | 6.37   |
| 257302_at   | At3g30220 | Expressed Protein    | 0.0434 | 0.0091 | 3.52  | -3.57 | 1.12   |
| 256591_at   | At3g31910 | Expressed Protein    | 0.0493 | 0.0404 | -4.17 | 2.95  | -1.02  |
| 256592_at   | At3g31915 | Expressed Protein    | 0.0466 | 0.0327 | -2.14 | 6.84  | -4.57  |
| 252696_at   | At3g43650 | Unknown Protein      | 0.0445 | 0.0182 | 4.13  | -4.04 | -1.16  |
| 255392_at   | At4g03680 | Expressed Protein    | 0.0475 | 0.0471 | -5.39 | 4.70  | -10.05 |
| 255398_at   | At4g03740 | Expressed Protein    | 0.0493 | 0.0413 | 4.90  | 1.53  | -5.96  |
| 255167_at   | At4g07920 | Unknown Protein      | 0.0457 | 0.0212 | -1.51 | 6.74  | -3.40  |
| 255085_at   | At4g09290 | Expressed Protein    | 0.0407 | 0.0163 | -5.07 | 2.55  | -8.07  |
| 254949_at   | At4g11020 | Expressed Protein    | 0.0441 | 0.0126 | 5.47  | 2.22  | -4.00  |
| 245420_at   | At4g17410 | Expressed Protein    | 0.0434 | 0.0068 | -5.00 | 3.73  | -1.04  |
| 254383_at   | At4g21950 | Expressed Protein    | 0.0475 | 0.0363 | 1.76  | 6.79  | -2.65  |
| 254295_at   | At4g23080 | Expressed Protein    | 0.0417 | 0.0053 | 1.02  | 2.97  | -2.50  |
| 253656_at   | At4g30090 | Expressed Protein    | 0.0486 | 0.0392 | 2.34  | -2.86 | 3.01   |
| 252889_at   | At4g39380 | Expressed Protein    | 0.0441 | 0.0107 | -3.24 | 5.28  | 1.28   |
| 251129_at   | At5g01150 | Hypothetical Protein | 0.0475 | 0.0463 | -2.70 | 1.47  | 2.61   |
| 251012_at   | At5g02580 | Expressed Protein    | 0.0441 | 0.0091 | 1.62  | 5.73  | -11.11 |
| 245153_at   | At5g12450 | Expressed Protein    | 0.0479 | 0.0298 | -1.08 | 4.05  | -3.70  |
| 249756_at   | At5g24313 | Expressed Protein    | 0.0453 | 0.0204 | -2.86 | 2.27  | 3.84   |
| 246811_at   | At5g27170 | Expressed Protein    | 0.0482 | 0.0407 | -3.23 | 1.37  | 3.66   |
| 246729_at   | At5g28070 | Hypothetical Protein | 0.0445 | 0.0151 | -1.49 | 4.31  | -6.87  |
| 246711_at   | At5g28190 | Hypothetical Protein | 0.0445 | 0.0133 | 1.72  | 3.41  | -2.61  |
| 246642_s_at | At5g34920 | Unknown Protein      | 0.0409 | 0.0176 | 4.90  | -4.62 | 1.05   |
| 249099_at   | At5g43550 | Expressed Protein    | 0.0493 | 0.0456 | 5.14  | 1.99  | -3.17  |
| 248706_at   | At5g48530 | Expressed Protein    | 0.0476 | 0.0388 | -3.24 | -2.88 | 3.99   |
| 248598_at   | At5g49370 | Hypothetical Protein | 0.0441 | 0.0100 | -2.56 | 4.37  | 1.78   |
| 247646_at   | At5g59990 | Expressed Protein    | 0.0475 | 0.0354 | 2.97  | 1.19  | -3.03  |

<sup>a</sup>Probe set ID represents Affymetrix probe set number.

<sup>b</sup>AGI represents *Arabidopsis* Genome Initiative (AGI) locus identifier corresponding to each gene represented on the array.

<sup>c</sup> $q$ -value  $\leq 0.05$  (5% False discovery rate) was used to determine genes differentially expressed in PPV-infected protoplasts relative to the control.

<sup>d</sup> $p$ -values ( $p \leq 0.05$ ) from the ANOVA were used to calculate  $q$ -value after adjusting the values with method as described [21].

<sup>e</sup>Calculation of fold changes was defined in Methods.

<sup>f</sup>hpt, hours post transfection.

<sup>g</sup>Determined following the method of the *Arabidopsis* MIPS (Munich Information Centre for Protein Sequences) functional classification scheme.
