# Supplementary material for: Altered gene expression changes in Arabidopsis leaf tissues and protoplasts in response to Plum pox virus infection
Source: PubMed Central journal article supplement (PMC2478689; doi:10.1186/1471-2164-9-325), 2008-07-09
Supplement: 1471-2164-9-325-S4.pdf [file 1471-2164-9-325-S4.pdf]

**Supplemental Table 4.** Expression levels of common genes induced in PPV-infected *Arabidopsis* protoplasts and in infected leaf tissues

| Probe set IDs <sup>a</sup>                                                                       | AGI <sup>b</sup> locus | Description                                 | Expression levels in pPPV-SK68 transfected protoplast cells |                              |                          |        |        |                 | Expression levels in PPV infected leaf tissues |                          |                     |
|--------------------------------------------------------------------------------------------------|------------------------|---------------------------------------------|-------------------------------------------------------------|------------------------------|--------------------------|--------|--------|-----------------|------------------------------------------------|--------------------------|---------------------|
|                                                                                                  |                        |                                             | <i>q</i> -value <sup>c</sup>                                | <i>p</i> -value <sup>d</sup> | Fold Change <sup>e</sup> |        |        | <i>q</i> -value | <i>p</i> -value                                | Fold Change <sup>e</sup> |                     |
|                                                                                                  |                        |                                             |                                                             |                              | 3 hpt <sup>f</sup>       | 6 hpt  | 12 hpt |                 |                                                |                          | 17 dpi <sup>g</sup> |
| <b>A. Defence and virulence<sup>h</sup></b>                                                      |                        |                                             |                                                             |                              |                          |        |        |                 |                                                |                          |                     |
| 260584_at                                                                                        | At2g43660              | β-1,3-glucanase, putative                   | 0.0434                                                      | 0.0093                       | -1.06                    | -7.69  | 4.60   | 0.0343          | 0.0408                                         | 4.67                     |                     |
| 266877_at                                                                                        | At2g44570              | Glycosyl hydrolase family 9 protein         | 0.0397                                                      | 0.0037                       | 5.21                     | 1.79   | -1.52  | 0.0354          | 0.0415                                         | 2.76                     |                     |
| 245849_at                                                                                        | At5g13520              | Hydrolase-like protein                      | 0.0475                                                      | 0.0376                       | -1.56                    | -3.13  | 4.35   | 0.0284          | 0.0371                                         | 18.81                    |                     |
| 248989_at                                                                                        | At5g45200              | Disease resistance protein, TIR-NBS-LRR     | 0.0431                                                      | 0.0085                       | -1.49                    | 6.39   | 2.12   | 0.0437          | 0.0466                                         | 10.84                    |                     |
| <b>B. Cellular communication/Signal transduction mechanism/transmembrane signal transduction</b> |                        |                                             |                                                             |                              |                          |        |        |                 |                                                |                          |                     |
| 257229_at                                                                                        | At3g16490              | Calmodulin-binding family protein           | 0.0495                                                      | 0.0485                       | 4.01                     | -8.33  | 2.48   | 0.0096          | 0.0215                                         | 4.37                     |                     |
| <b>E. Metabolism/energy/membrane associated proteins</b>                                         |                        |                                             |                                                             |                              |                          |        |        |                 |                                                |                          |                     |
| 256375_at                                                                                        | At1g66720              | Carboxyl methyltransferase family protein   | 0.0475                                                      | 0.0319                       | 6.18                     | -1.28  | -2.86  | 0.0194          | 0.0304                                         | 5.37                     |                     |
| 263068_at                                                                                        | At2g17580              | Polynucleotide adenylyltransferase protein  | 0.0447                                                      | 0.0183                       | -3.03                    | -1.61  | 3.68   | 0.0275          | 0.0365                                         | 3.10                     |                     |
| 258962_at                                                                                        | At3g10570              | Cytochrome P450, putative                   | 0.0401                                                      | 0.0044                       | -1.20                    | -1.01  | 6.66   | 0.0126          | 0.0247                                         | 9.08                     |                     |
| 257143_at                                                                                        | At3g20110              | Cytochrome P450, putative                   | 0.0441                                                      | 0.0120                       | 1.34                     | 4.49   | -5.00  | 0.0448          | 0.0473                                         | 3.31                     |                     |
| 253502_at                                                                                        | At4g31940              | Cytochrome P450-like protein                | 0.0405                                                      | 0.0046                       | -14.29                   | 6.81   | -2.17  | 0.0018          | 0.0099                                         | 14.44                    |                     |
| <b>F. Proteins with binding function or cofactor requirement</b>                                 |                        |                                             |                                                             |                              |                          |        |        |                 |                                                |                          |                     |
| 261029_at                                                                                        | At1g17330              | Metal-dependent phosphohydrolase protein    | 0.0417                                                      | 0.0068                       | 1.19                     | 3.60   | -1.52  | 0.0102          | 0.0221                                         | 4.51                     |                     |
| 260921_at                                                                                        | At1g21540              | AMP-binding protein, putative               | 0.0460                                                      | 0.0228                       | -2.22                    | 1.68   | 5.50   | 0.0456          | 0.0478                                         | 3.61                     |                     |
| 258028_at                                                                                        | At3g27473              | DC1 domain containing protein               | 0.0479                                                      | 0.0397                       | 3.61                     | -3.70  | -1.39  | 0.0275          | 0.0365                                         | 3.49                     |                     |
| 254771_at                                                                                        | At4g13380              | Heavy metal domain containing protein       | 0.0475                                                      | 0.0378                       | 6.90                     | -4.00  | 1.34   | 0.0167          | 0.0283                                         | 2.59                     |                     |
| 247941_at                                                                                        | At5g57200              | ENTH domain-containing protein              | 0.0461                                                      | 0.0230                       | 2.82                     | -11.11 | 2.00   | 0.0274          | 0.0363                                         | 2.69                     |                     |
| <b>H. Protein fate</b>                                                                           |                        |                                             |                                                             |                              |                          |        |        |                 |                                                |                          |                     |
| 250162_at                                                                                        | At5g15250              | FtsH protease, putative                     | 0.0479                                                      | 0.0398                       | 1.56                     | 10.47  | -1.75  | 0.0397          | 0.0442                                         | 3.93                     |                     |
| <b>I. Transcription/splicing/RNA processing</b>                                                  |                        |                                             |                                                             |                              |                          |        |        |                 |                                                |                          |                     |
| 246790_at                                                                                        | At5g27610              | MYB family transcription factor             | 0.0453                                                      | 0.0210                       | -5.26                    | -1.04  | 3.43   | 0.0059          | 0.0170                                         | 3.69                     |                     |
| 267177_at                                                                                        | At2g37580              | Zinc RING finger family protein, C3HC4-type | 0.0474                                                      | 0.0293                       | 13.22                    | 2.20   | -1.09  | 0.0410          | 0.0443                                         | 4.06                     |                     |
| <b>K. Transposable elements, viral and plasmid proteins</b>                                      |                        |                                             |                                                             |                              |                          |        |        |                 |                                                |                          |                     |
| 266586_s_at                                                                                      | At4g08060              | CACTA-like transposase family               | 0.0388                                                      | 0.0005                       | -5.00                    | 8.51   | -2.22  | 0.0068          | 0.0181                                         | 2.51                     |                     |
| 266470_at                                                                                        | At2g31080              | Non-LTR retrotransposon family              | 0.0445                                                      | 0.0162                       | -1.20                    | -5.00  | 5.05   | 0.0402          | 0.0444                                         | 3.21                     |                     |
| <b>O. Unknown</b>                                                                                |                        |                                             |                                                             |                              |                          |        |        |                 |                                                |                          |                     |
| 261414_at                                                                                        | At1g07795              | Unknown protein                             | 0.0475                                                      | 0.0318                       | -1.92                    | 1.24   | 3.24   | 0.0108          | 0.0228                                         | 2.94                     |                     |
| 261529_at                                                                                        | At1g14430              | Unknown protein                             | 0.0434                                                      | 0.0089                       | -1.52                    | 10.14  | 1.50   | 0.0062          | 0.0174                                         | 3.11                     |                     |
| 262465_at                                                                                        | At1g50270              | Unknown protein                             | 0.0494                                                      | 0.0468                       | -1.37                    | 6.27   | 2.04   | 0.0299          | 0.0381                                         | 4.35                     |                     |
| 245655_at                                                                                        | At1g56530              | Unknown protein                             | 0.0434                                                      | 0.0091                       | 7.94                     | -2.50  | -6.67  | 0.0235          | 0.0336                                         | 6.62                     |                     |
| 263672_at                                                                                        | At2g04820              | Unknown protein                             | 0.0405                                                      | 0.0048                       | -3.70                    | 8.74   | -2.17  | 0.0135          | 0.0256                                         | 4.12                     |                     |
| 266128_at                                                                                        | At2g45000              | Unknown protein                             | 0.0401                                                      | 0.0042                       | 6.49                     | -1.28  | 1.02   | 0.0410          | 0.0449                                         | 3.50                     |                     |
| 263781_at                                                                                        | At2g46360              | Unknown protein                             | 0.0445                                                      | 0.0159                       | 2.19                     | 7.61   | -2.70  | 0.0326          | 0.0397                                         | 4.01                     |                     |
| 257302_at                                                                                        | At3g30220              | Unknown protein                             | 0.0434                                                      | 0.0091                       | 3.52                     | -3.57  | 1.12   | 0.0017          | 0.0098                                         | 2.68                     |                     |
| 246811_at                                                                                        | At5g27170              | Unknown protein                             | 0.0482                                                      | 0.0407                       | -3.23                    | 1.37   | 3.66   | 0.0280          | 0.0368                                         | 2.62                     |                     |
| 249099_at                                                                                        | At5g43550              | Unknown protein                             | 0.0493                                                      | 0.0456                       | 5.14                     | 1.99   | -3.13  | 0.0228          | 0.0332                                         | 4.01                     |                     |
| 248941_s_at                                                                                      | At5g45460              | Unknown protein                             | 0.0457                                                      | 0.0219                       | -1.72                    | 1.08   | 4.22   | 0.0427          | 0.0460                                         | 5.82                     |                     |
| 248706_at                                                                                        | At5g48530              | Unknown protein                             | 0.0476                                                      | 0.0388                       | -3.23                    | -2.86  | 3.99   | 0.0403          | 0.0445                                         | 3.16                     |                     |

<sup>a</sup>Probe set ID represents Affymetrix probe set number.<sup>b</sup>AGI represents *Arabidopsis* Genome Initiative (AGI) locus identifier that corresponds to each gene represented on the array.<sup>c</sup>*q*-value ≤ 0.05 (5% False discovery rate) was used to determine genes differentially expressed in PPV-infected leaves relative to mock-inoculated control leaves.<sup>d</sup>*p*-values (*p* ≤ 0.05) from the ANOVA were used to calculate *q*-value after adjusting the values using Benjamini and Hochberg [21] multiple testing correction.<sup>e</sup>Calculation of fold changes was defined in Methods.<sup>f</sup>hpt, hours post transfection.<sup>g</sup>dpi, days post inoculation.<sup>h</sup>Determined following the method of the *Arabidopsis* MIPS (Munich Information Centre for Protein Sequences) functional classification scheme.
