# Supplementary material for: Altered gene expression changes in Arabidopsis leaf tissues and protoplasts in response to Plum pox virus infection
Source: PubMed Central journal article supplement (PMC2478689; doi:10.1186/1471-2164-9-325), 2008-07-09
Supplement: 1471-2164-9-325-S5.pdf [file 1471-2164-9-325-S5.pdf]

**Supplemental Table 5.** Expression levels of common genes repressed in PPV-infected *Arabidopsis* protoplasts and in infected leaf tissues

| Probe set IDs <sup>a</sup>                                                                | AGI <sup>b</sup> locus | Description                                             | Expression levels in pPPV-SK68 transfected protoplast cells |                              |                          |        |        |                 | Expression levels in PPV infected leaf tissues |                          |                     |
|-------------------------------------------------------------------------------------------|------------------------|---------------------------------------------------------|-------------------------------------------------------------|------------------------------|--------------------------|--------|--------|-----------------|------------------------------------------------|--------------------------|---------------------|
|                                                                                           |                        |                                                         | <i>q</i> -value <sup>c</sup>                                | <i>p</i> -value <sup>d</sup> | Fold Change <sup>e</sup> |        |        | <i>q</i> -value | <i>p</i> -value                                | Fold Change <sup>e</sup> |                     |
|                                                                                           |                        |                                                         |                                                             |                              | 3 hpt <sup>f</sup>       | 6 hpt  | 12 hpt |                 |                                                |                          | 17 dpi <sup>g</sup> |
| <b>A. Defence and virulence<sup>h</sup></b>                                               |                        |                                                         |                                                             |                              |                          |        |        |                 |                                                |                          |                     |
| 257441_at                                                                                 | At2g04020              | Gdsl-Motif Lipase/Hydrolase Family Protein              | 0.0441                                                      | 0.0113                       | 2.36                     | 2.96   | -5.39  | 0.0037          | 0.0139                                         | -14.9                    |                     |
| 253226_at                                                                                 | At4g35010              | Glycosyl Hydrolase Family 35 Protein                    | 0.0465                                                      | 0.0237                       | -3.12                    | -2.75  | 1.10   | 0.0328          | 0.0398                                         | -4.2                     |                     |
| <b>C. Cell Cycle/ DNA processing/chromatin regulation and cytoskeleton reorganization</b> |                        |                                                         |                                                             |                              |                          |        |        |                 |                                                |                          |                     |
| 253142_at                                                                                 | At4g35520              | Dna Mismatch Repair Family Protein                      | 0.0475                                                      | 0.037                        | -1.38                    | 1.00   | -3.32  | 0.0178          | 0.0292                                         | -6.9                     |                     |
| 252428_at                                                                                 | At3g47660              | Regulator Of Chromosome Condensation (Rcc1) Protein     | 0.0466                                                      | 0.0252                       | -3.49                    | 3.14   | 1.27   | 0.0098          | 0.0217                                         | -2.8                     |                     |
| <b>D. Development/storage proteins</b>                                                    |                        |                                                         |                                                             |                              |                          |        |        |                 |                                                |                          |                     |
| 245658_at                                                                                 | At1g28270              | Rapid Alkalinization Factor (Ralf) Family Protein       | 0.0473                                                      | 0.0341                       | -1.39                    | -3.22  | 2.81   | 0.0309          | 0.0386                                         | -5.0                     |                     |
| 245267_at                                                                                 | At4g14060              | Major Latex Protein-Related / Mlp-Related               | 0.0407                                                      | 0.0054                       | 2.66                     | -6.08  | -1.76  | 0.0361          | 0.0419                                         | -5.4                     |                     |
| <b>E. Metabolism/energy/membrane associated proteins</b>                                  |                        |                                                         |                                                             |                              |                          |        |        |                 |                                                |                          |                     |
| 266875_at                                                                                 | At2g44800              | Oxidoreductase, 2Og-Fe(Ii) Oxygenase Family Protein     | 0.0445                                                      | 0.0172                       | 3.93                     | -1.10  | -5.30  | 0.0003          | 0.0043                                         | -7.7                     |                     |
| 252780_at                                                                                 | At3g42960              | Alcohol Dehydrogenase (Ata1)                            | 0.0474                                                      | 0.0301                       | -4.93                    | -1.62  | -1.44  | 0.0225          | 0.0329                                         | -3.8                     |                     |
| 255359_at                                                                                 | At4g03950              | Glucose-6-Phosphate/Phosphate Translocator, Putative    | 0.039                                                       | 0.00167                      | -9.89                    | 2.14   | 1.72   | 0.0000          | 0.0015                                         | -1.7                     |                     |
| 249729_at                                                                                 | At5g24410              | Glucosamine/Galactosamine-6-Phosphate Isomerase-Related | 0.0445                                                      | 0.0153                       | -5.24                    | 2.42   | -5.96  | 0.0203          | 0.0312                                         | -9.1                     |                     |
| 249484_at                                                                                 | At5g38970              | Cytochrome P450, Putative (Metabolism)                  | 0.0390                                                      | 0.0022                       | -1.22                    | -4.66  | 6.39   | 0.0068          | 0.0181                                         | -17.9                    |                     |
| <b>F. Proteins with binding function or cofactor requirement</b>                          |                        |                                                         |                                                             |                              |                          |        |        |                 |                                                |                          |                     |
| 257397_at                                                                                 | At2g20430              | P21-Rho-Binding Domain Protein                          | 0.0459                                                      | 0.0225                       | 4.40                     | -1.56  | -3.33  | 0.0009          | 0.0071                                         | -2.5                     |                     |
| 255149_at                                                                                 | At4g08150              | Homeobox Protein Knotted-1 Like 1 (Knat1)               | 0.0447                                                      | 0.0186                       | -9.21                    | 1.73   | -2.63  | 0.0165          | 0.0282                                         | -2.1                     |                     |
| 245538_at                                                                                 | At4g15200              | Fh2 Domain Containing Protein                           | 0.0434                                                      | 0.00966                      | -1.32                    | 4.26   | -6.15  | 0.0273          | 0.0363                                         | -10.5                    |                     |
| 246963_at                                                                                 | At5g24820              | Dna-Binding Protein Cnd41, Putative                     | 0.0468                                                      | 0.0267                       | 3.27                     | -3.03  | -1.05  | 0.0018          | 0.0099                                         | -2.0                     |                     |
| <b>H. Protein fate</b>                                                                    |                        |                                                         |                                                             |                              |                          |        |        |                 |                                                |                          |                     |
| 248062_at                                                                                 | At5g55450              | Protease Inhibitor                                      | 0.0445                                                      | 0.0138                       | -1.24                    | 1.00   | -15.26 | 0.0010          | 0.0078                                         | -13.9                    |                     |
| <b>I. Transcription/splicing/RNA processing</b>                                           |                        |                                                         |                                                             |                              |                          |        |        |                 |                                                |                          |                     |
| 256395_at                                                                                 | At3g06120              | Basic Helix-Loop-Helix (Bhlh) Family Protein            | 0.0397                                                      | 0.0035                       | 2.75                     | -8.17  | -1.53  | 0.0367          | 0.0423                                         | -2.6                     |                     |
| 257656_at                                                                                 | At3g13228              | Zinc Finger (C3Hc4-Type Ring Finger) Family Protein     | 0.0474                                                      | 0.0309                       | -1.51                    | 2.08   | -7.82  | 0.0239          | 0.0340                                         | -6.7                     |                     |
| <b>K. Transposable elements, viral and plasmid proteins</b>                               |                        |                                                         |                                                             |                              |                          |        |        |                 |                                                |                          |                     |
| 263746_at                                                                                 | At2g21460              | Copia-Like Retrotransposon Family                       | 0.0448                                                      | 0.0198                       | -2.95                    | 8.04   | -2.09  | 0.0052          | 0.0161                                         | -2.9                     |                     |
| 255463_at                                                                                 | At4g02960              | Copia-Like Retrotransposon Family                       | 0.0445                                                      | 0.0163                       | 7.56                     | -5.19  | -1.94  | 0.0476          | 0.0487                                         | -5.1                     |                     |
| 255188_at                                                                                 | At4g07340              | Replication Protein-Related                             | 0.0401                                                      | 0.00427                      | 2.34                     | -10.28 | -1.28  | 0.0339          | 0.0405                                         | -13.7                    |                     |
| 255156_at                                                                                 | At4g07780              | Gypsy-Like Retrotransposon Family (Athila)              | 0.0441                                                      | 0.0106                       | 1.61                     | 2.42   | -18.75 | 0.0313          | 0.0388                                         | -11.3                    |                     |
| 245942_at                                                                                 | At5g19490              | Repressor Protein-Related                               | 0.0493                                                      | 0.0464                       | 2.26                     | -1.01  | -4.80  | 0.0000          | 0.0014                                         | -3.1                     |                     |
| <b>O. Unknown</b>                                                                         |                        |                                                         |                                                             |                              |                          |        |        |                 |                                                |                          |                     |
| 264735_s_at                                                                               | At1g62060              | Expressed Protein                                       | 0.0475                                                      | 0.0460                       | 1.76                     | -2.96  | 2.68   | 0.0409          | 0.0449                                         | -3.1                     |                     |
| 260198_at                                                                                 | At1g67635              | Expressed Protein                                       | 0.0496                                                      | 0.0493                       | 2.02                     | -2.78  | -5.66  | 0.0002          | 0.0039                                         | -5.4                     |                     |
| 263337_at                                                                                 | At2g04990              | Unknown Protein                                         | 0.0475                                                      | 0.0339                       | -2.91                    | 2.80   | -3.24  | 0.0171          | 0.0285                                         | -1.5                     |                     |
| 265746_at                                                                                 | At2g06630              | Hypothetical Protein                                    | 0.0445                                                      | 0.0142                       | 1.19                     | 1.22   | -40.97 | 0.0089          | 0.0206                                         | -3.0                     |                     |
| 252665_at                                                                                 | At3g44140              | Expressed Protein                                       | 0.0449                                                      | 0.0203                       | 1.06                     | -3.13  | 1.09   | 0.0035          | 0.0135                                         | -2.1                     |                     |
| 255029_x_at                                                                               | At4g09470              | Expressed Protein                                       | 0.0465                                                      | 0.0243                       | 1.43                     | -1.60  | -3.65  | 0.0014          | 0.0088                                         | -1.8                     |                     |
| 254240_at                                                                                 | At4g23496              | Expressed Protein                                       | 0.0478                                                      | 0.0394                       | 1.58                     | -3.73  | 1.20   | 0.0017          | 0.0097                                         | -2.8                     |                     |
| 249756_at                                                                                 | At5g24313              | Expressed Protein                                       | 0.0453                                                      | 0.0204                       | -2.86                    | 2.27   | 3.84   | 0.0263          | 0.0356                                         | -10.3                    |                     |
| 249531_at                                                                                 | At5g38770              | Hypothetical Protein                                    | 0.0447                                                      | 0.0185                       | 1.28                     | -8.76  | 2.30   | 0.0152          | 0.0272                                         | -10.7                    |                     |
| 248904_at                                                                                 | At5g46295              | Expressed Protein                                       | 0.0445                                                      | 0.0169                       | 1.53                     | 1.94   | -3.08  | 0.0164          | 0.0280                                         | -2.4                     |                     |

<sup>a</sup>Probe set ID represents Affymetrix probe set number.<sup>b</sup>AGI represents *Arabidopsis* Genome Initiative (AGI) locus identifier that corresponds to each gene represented on the array.<sup>c</sup>*q*-value  $\leq 0.05$  (5% False discovery rate) was used to determine genes differentially expressed in PPV-infected leaves relative to mock-inoculated control leaves.<sup>d</sup>*p*-values ( $p \leq 0.05$ ) from the ANOVA were used to calculate *q*-value after adjusting the values using Benjamini and Hochberg [21] multiple testing correction.<sup>e</sup>Calculation of fold changes was defined in Methods.<sup>f</sup>hpt, hours post transfection.<sup>g</sup>dpi, days post inoculation.<sup>h</sup>Determined following the method of the *Arabidopsis* MIPS (Munich Information Centre for Protein Sequences) functional classification scheme.
