# Supplementary material for: Altered gene expression changes in Arabidopsis leaf tissues and protoplasts in response to Plum pox virus infection
Source: PubMed Central journal article supplement (PMC2478689; doi:10.1186/1471-2164-9-325), 2008-07-09
Supplement: 1471-2164-9-325-S7.pdf [file 1471-2164-9-325-S7.pdf]

Relative expression level of the gene

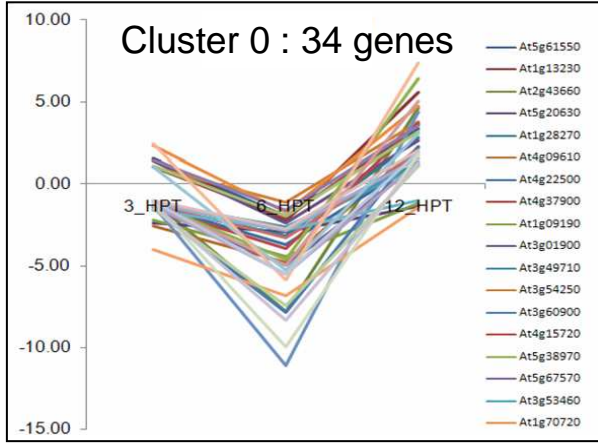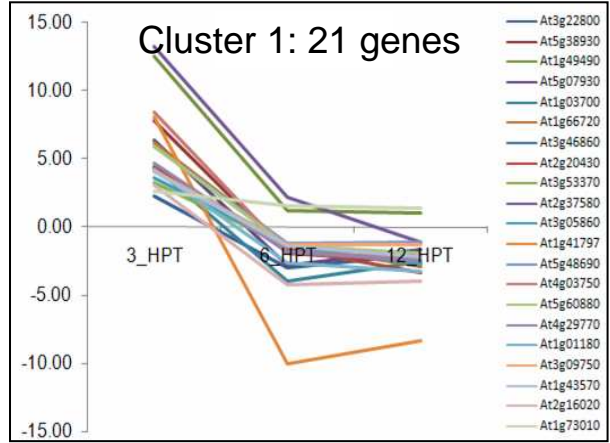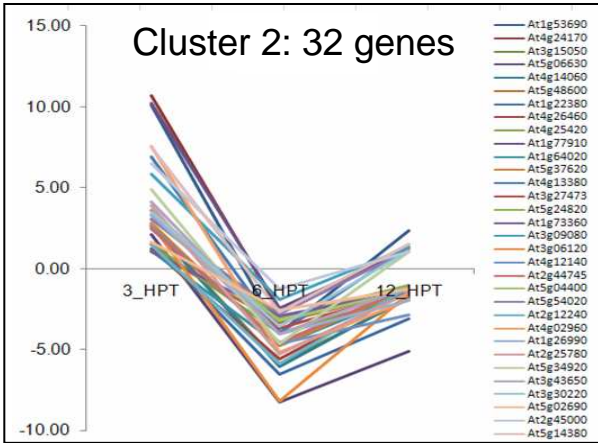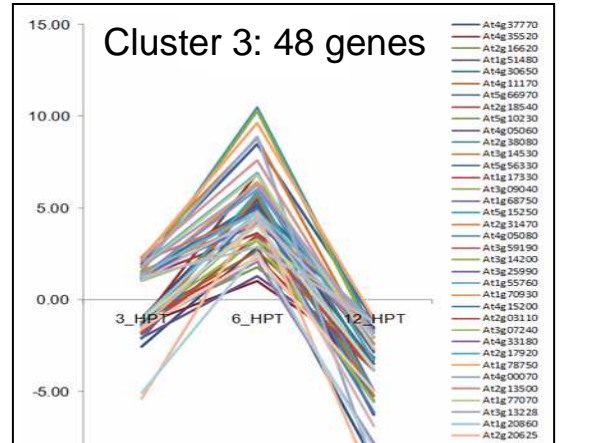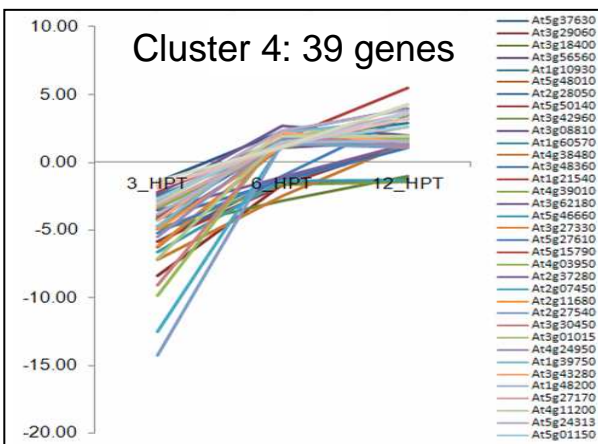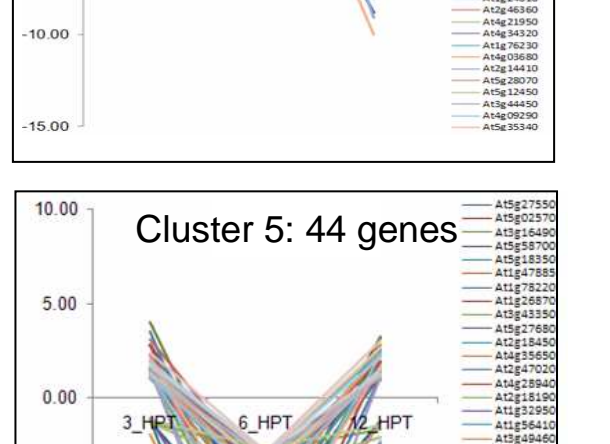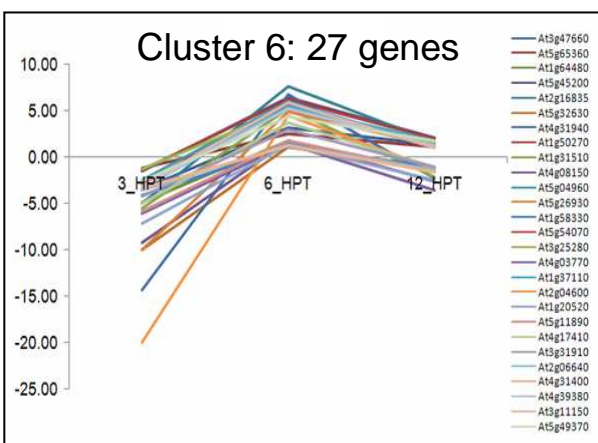

Hours post transfaction (hpt)

Relative expression level of the gene

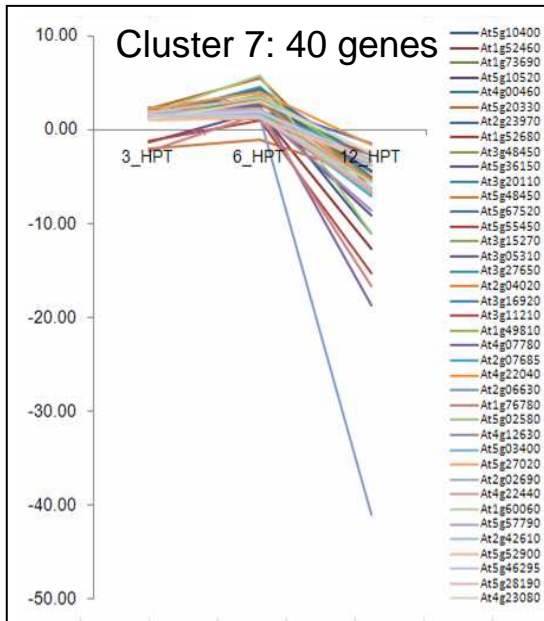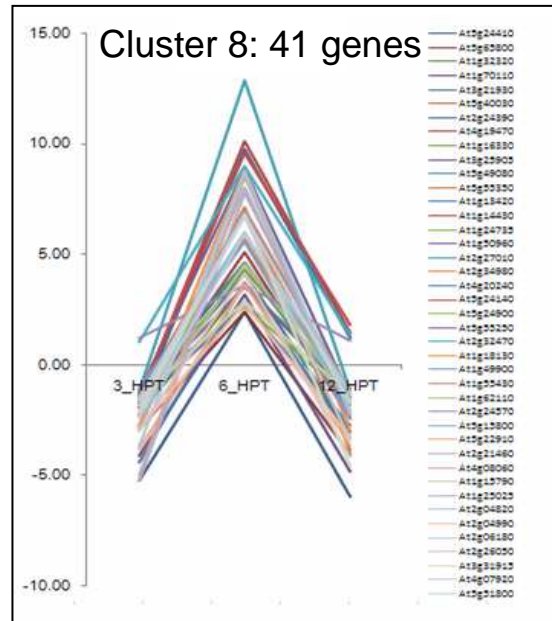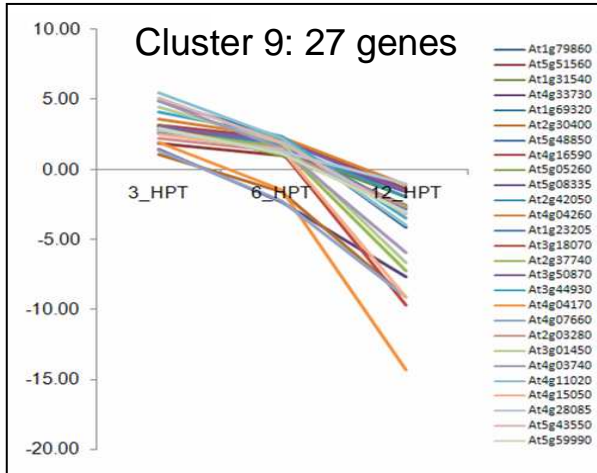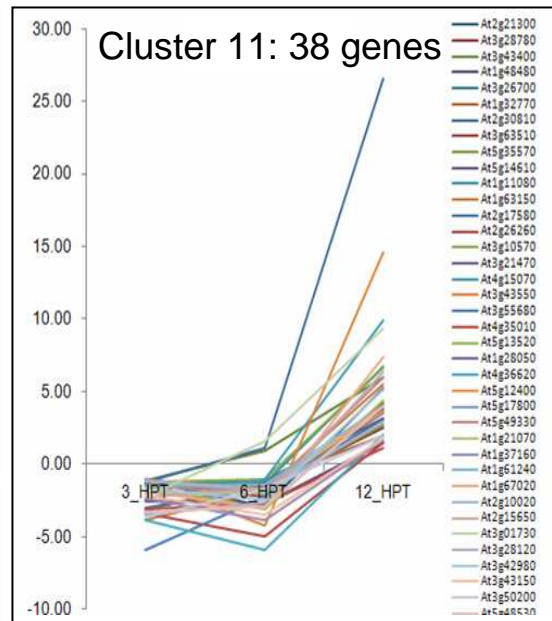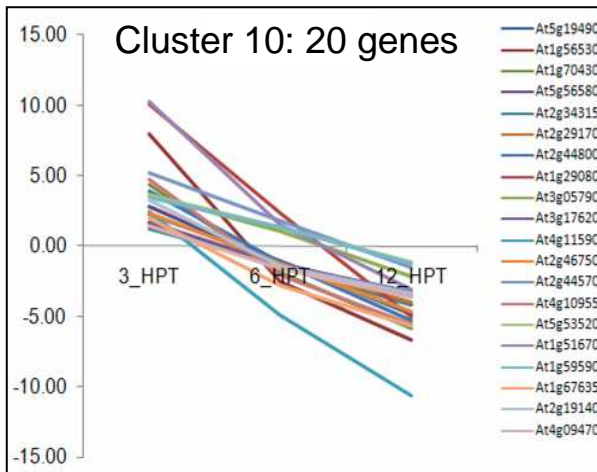

Hours post transfection (hpt)
