# Supplementary material for: Altered gene expression changes in Arabidopsis leaf tissues and protoplasts in response to Plum pox virus infection
Source: PubMed Central journal article supplement (PMC2478689; doi:10.1186/1471-2164-9-325), 2008-07-09
Supplement: 1471-2164-9-325-S8.pdf [file 1471-2164-9-325-S8.pdf]

**Supplemental Table 6.** Expression profiles of *Arabidopsis* genes differentially regulated by PPV infectious clone in transfected protoplasts belonging to twelve distinct cluster groups

| Probe set IDs                                                                                                                                                                               | AGI <sup>b</sup> locus | Description                                                              | q-value <sup>c</sup> | p-value <sup>d</sup> | Cluster | Fold Change <sup>f</sup> |                    |       | Functional category according to<br><i>Arabidopsis</i> MIPS database <sup>h</sup>      |
|---------------------------------------------------------------------------------------------------------------------------------------------------------------------------------------------|------------------------|--------------------------------------------------------------------------|----------------------|----------------------|---------|--------------------------|--------------------|-------|----------------------------------------------------------------------------------------|
|                                                                                                                                                                                             |                        |                                                                          |                      |                      |         | groups <sup>e</sup>      | 3 hpt <sup>g</sup> | 6 hpt |                                                                                        |
| <b>CLUSTER 0: Majority of the genes repressed at 3 hpt and significantly repressed (q-value ≤ 0.05; ≤ 2.5) at 6 hpt followed by significant induction (q-value ≤ 0.05; ≥ 2.5) at 12 hpt</b> |                        |                                                                          |                      |                      |         |                          |                    |       |                                                                                        |
| 247531_at                                                                                                                                                                                   | At5g61550              | Protein kinase 1, PK1                                                    | 0.0445               | 0.0160               | 0       | 1.55                     | -2.00              | 3.35  | Cellular communication/Signal transduction mechanism/transmembrane signal transduction |
| 262774_at                                                                                                                                                                                   | At1g13230              | Chloroplast nucleoid DNA binding protein, putative                       | 0.0448               | 0.0195               | 0       | 1.53                     | -2.27              | 5.58  | Chloroplast                                                                            |
| 260584_at                                                                                                                                                                                   | At2g43660              | β-1,3-Glucanase, Putative                                                | 0.0434               | 0.0093               | 0       | -1.07                    | -7.84              | 4.60  | Defence and virulence                                                                  |
| 246004_at                                                                                                                                                                                   | At5g20630              | Germin-Like Protein; Ger3                                                | 0.0488               | 0.0444               | 0       | -2.38                    | -2.94              | -1.39 | Defence and virulence                                                                  |
| 245658_at                                                                                                                                                                                   | At1g28270              | Rapid Alkalinization Factor (Ralf) Family Protein                        | 0.0473               | 0.0341               | 0       | -1.39                    | -3.22              | 2.81  | Development/storage proteins                                                           |
| 255049_at                                                                                                                                                                                   | At4g09610              | Gibberellin-Regulated Protein 2 (Gasa2) / Gibberellin-Responsive Protein | 0.0492               | 0.0453               | 0       | -2.55                    | -4.79              | 2.23  | Development/storage proteins                                                           |
| 254316_at                                                                                                                                                                                   | At4g22500              | Pseudogene, Glycine-Rich Protein Family                                  | 0.0475               | 0.0336               | 0       | -1.30                    | -3.70              | 1.33  | Development/storage proteins                                                           |
| 253012_at                                                                                                                                                                                   | At4g37900              | Glycine-rich protein                                                     | 0.0445               | 0.0158               | 0       | 1.01                     | -2.08              | 3.61  | Development/storage proteins                                                           |
| 264251_at                                                                                                                                                                                   | At1g09190              | Pentatricopeptide (Ppr) Repeat-Containing Protein                        | 0.0475               | 0.0380               | 0       | -2.27                    | -4.48              | -1.22 | Primary /secondary metabolism                                                          |
| 258973_at                                                                                                                                                                                   | At3g01900              | Cytochrome P450 family protein                                           | 0.0475               | 0.0337               | 0       | 1.34                     | -2.44              | 2.62  | Primary /secondary metabolism                                                          |
| 252245_at                                                                                                                                                                                   | At3g49710              | Pentatricopeptide (Ppr) Repeat-Containing Protein                        | 0.0431               | 0.0085               | 0       | -1.20                    | -2.63              | 1.23  | Primary /secondary metabolism                                                          |
| 251881_at                                                                                                                                                                                   | At3g54250              | Mevalonate diphosphate decarboxylase, putative                           | 0.0476               | 0.0383               | 0       | 1.04                     | -1.12              | 3.80  | Primary /secondary metabolism                                                          |
| 251394_at                                                                                                                                                                                   | At3g60900              | Fasciclin-Like Arabinogalactan-Protein (Fla10)                           | 0.0441               | 0.0105               | 0       | -1.52                    | -7.87              | 2.29  | Primary /secondary metabolism                                                          |
| 245508_at                                                                                                                                                                                   | At4g15720              | Pentatricopeptide (Ppr) Repeat-Containing Protein                        | 0.0397               | 0.0038               | 0       | -1.45                    | -4.00              | 3.71  | Primary /secondary metabolism                                                          |
| 249484_at                                                                                                                                                                                   | At5g38970              | Cytochrome P450, Putative (Metabolism)                                   | 0.0390               | 0.0022               | 0       | -1.22                    | -4.66              | 6.39  | Primary /secondary metabolism                                                          |
| 247004_at                                                                                                                                                                                   | At5g67570              | Pentatricopeptide (Ppr) Repeat-Containing Protein                        | 0.0461               | 0.0229               | 0       | -1.52                    | -5.00              | 1.18  | Primary /secondary metabolism                                                          |
| 251956_at                                                                                                                                                                                   | At3g53460              | RNA-Binding Protein; Cp 29                                               | 0.0493               | 0.0462               | 0       | -1.56                    | -2.86              | 1.10  | Proteins with binding function or cofactor requirement                                 |
| 260178_at                                                                                                                                                                                   | At1g70720              | invertase/pectin methylesterase inhibitor protein                        | 0.0434               | 0.0062               | 0       | 2.33                     | -1.72              | 4.71  | Re-assembly of cell wall associated genes                                              |
| 260573_at                                                                                                                                                                                   | At2g47280              | Pectinesterase Family Protein                                            | 0.0474               | 0.0303               | 0       | -1.27                    | -11.11             | 4.37  | Re-assembly of cell wall associated genes                                              |
| 247477_at                                                                                                                                                                                   | At5g62340              | Invertase/Pectin Methylesterase Inhibitor Family Protein                 | 0.0445               | 0.0164               | 0       | -1.28                    | -3.33              | 1.77  | Re-assembly of cell wall associated genes                                              |
| 266841_at                                                                                                                                                                                   | At2g26150              | Heat shock transcription factor, putative                                | 0.0475               | 0.0346               | 0       | 1.11                     | -2.00              | 3.16  | Transcription/splicing/RNA processing                                                  |
| 256918_s_at                                                                                                                                                                                 | At3g18960              | Transcriptional factor B3 family protein                                 | 0.0441               | 0.0129               | 0       | 1.44                     | -1.61              | 3.51  | Transcription/splicing/RNA processing                                                  |
| 249606_at                                                                                                                                                                                   | At5g37260              | Myb Family Transcription Factor                                          | 0.0407               | 0.0055               | 0       | -1.64                    | -2.86              | -1.04 | Transcription/splicing/RNA processing                                                  |
| 260193_at                                                                                                                                                                                   | At1g67640              | Lysine And Histidine Specific Transporter, Putative                      | 0.0453               | 0.0208               | 0       | -3.98                    | -6.83              | -1.43 | Transporters                                                                           |
| 266213_s_at                                                                                                                                                                                 | At2g06870              | Mutator-Like Transposase Family                                          | 0.0441               | 0.0109               | 0       | -1.22                    | -2.87              | 1.55  | Transposable elements, viral and plasmid proteins                                      |
| 266470_at                                                                                                                                                                                   | At2g31080              | Non-Ltr Retrotransposon Family (Line)                                    | 0.0445               | 0.0162               | 0       | -1.20                    | -5.00              | 5.05  | Transposable elements, viral and plasmid proteins                                      |
| 246667_at                                                                                                                                                                                   | At5g34840              | Mutator-Like Transposase Family                                          | 0.0465               | 0.0242               | 0       | -1.55                    | -7.45              | 1.06  | Transposable elements, viral and plasmid proteins                                      |
| 262625_at                                                                                                                                                                                   | At1g06440              | Expressed Protein                                                        | 0.0465               | 0.0239               | 0       | -1.32                    | -5.56              | 1.33  | Unknown proteins                                                                       |
| 246353_s_at                                                                                                                                                                                 | At1g39190              | Unknown Protein                                                          | 0.0485               | 0.0388               | 0       | 1.03                     | -5.26              | 3.07  | Unknown proteins                                                                       |
| 265655_at                                                                                                                                                                                   | At2g13920              | Unknown Protein                                                          | 0.0485               | 0.0391               | 0       | 2.43                     | -5.92              | 7.37  | Unknown proteins                                                                       |
| 265421_s_at                                                                                                                                                                                 | At2g20616              | Expressed Protein                                                        | 0.0482               | 0.0413               | 0       | -1.10                    | -5.56              | 1.92  | Unknown proteins                                                                       |
| 256599_at                                                                                                                                                                                   | At3g14760              | Expressed Protein                                                        | 0.0441               | 0.0108               | 0       | -1.04                    | -2.78              | 2.06  | Unknown proteins                                                                       |
| 255531_at                                                                                                                                                                                   | At4g02160              | Hypothetical Protein                                                     | 0.0390               | 0.0024               | 0       | -1.16                    | -10.00             | 1.81  | Unknown proteins                                                                       |
| 262002_at                                                                                                                                                                                   | At1g64450              | Proline-Rich Family Protein                                              | 0.0390               | 0.0030               | 0       | -1.28                    | -8.33              | 1.25  | Structural proteins                                                                    |
| <b>CLUSTER 1: Majority of the genes significantly induced (q-value ≤ 0.05; ≥ 2.5) at 3 hpt followed by significant repression (q-value ≤ 0.05; ≤ 2.5) at 6 or 12 hpt</b>                    |                        |                                                                          |                      |                      |         |                          |                    |       |                                                                                        |
| 258342_at                                                                                                                                                                                   | At3g22800              | Leucine-Rich Repeat Family Protein / Extensin Family Protein             | 0.0441               | 0.0106               | 1       | 2.27                     | -3.03              | -2.00 | Cellular communication/Signal transduction mechanism/transmembrane signal transduction |
| 249477_s_at                                                                                                                                                                                 | At5g38930              | Germin-Like Protein, Putative                                            | 0.0475               | 0.0319               | 1       | 7.80                     | -1.85              | -2.50 | Defence and virulence                                                                  |
| 262393_at                                                                                                                                                                                   | At1g49490              | Extensin family protein                                                  | 0.0494               | 0.0442               | 1       | 12.55                    | 1.16               | 1.01  | Development/storage proteins                                                           |
| 250579_at                                                                                                                                                                                   | At5g07930              | Terminal Ear1 Protein, Putative                                          | 0.0458               | 0.0224               | 1       | 6.35                     | -2.78              | -1.64 | Development/storage proteins                                                           |
| 264842_at                                                                                                                                                                                   | At1g03700              | Integral Membrane Family Protein                                         | 0.0390               | 0.0025               | 1       | 4.38                     | -3.95              | -2.56 | Intracellular membrane/membrane bound                                                  |
| 256375_at                                                                                                                                                                                   | At1g66720              | S-Adenosyl-L-Methionine:Carboxyl Methyltransferase Family Protein        | 0.0475               | 0.0319               | 1       | 6.18                     | -1.28              | -2.86 | Primary /secondary metabolism                                                          |
| 252500_at                                                                                                                                                                                   | At3g46860              | Serine protease inhibitor protein                                        | 0.0495               | 0.0483               | 1       | 4.23                     | -1.32              | -1.23 | Protein fate                                                                           |
| 257397_at                                                                                                                                                                                   | At2g20430              | P21-Rho-Binding Domain Protein                                           | 0.0459               | 0.0225               | 1       | 4.40                     | -1.56              | -3.33 | Proteins with binding function or cofactor requirement                                 |
| 251964_at                                                                                                                                                                                   | At3g53370              | DNA-binding family protein, S1FA                                         | 0.0390               | 0.0026               | 1       | 3.30                     | -1.39              | -1.22 | Proteins with binding function or cofactor requirement                                 |
| 267177_at                                                                                                                                                                                   | At2g37580              | Zinc RING finger family protein, C3HC4-type                              | 0.0474               | 0.0293               | 1       | 13.22                    | 2.20               | -1.09 | Transcription/splicing/RNA processing                                                  |
| 258734_at                                                                                                                                                                                   | At3g05860              | Mads-Box Protein (Agl45)                                                 | 0.0474               | 0.0299               | 1       | 3.63                     | -1.41              | -2.70 | Transcription/splicing/RNA processing                                                  |
| 259988_at                                                                                                                                                                                   | At1g41797              | Athila Orf 1, Putative                                                   | 0.0441               | 0.0108               | 1       | 8.03                     | -10.06             | -8.32 | Transposable elements, viral and plasmid proteins                                      |
| 248662_at                                                                                                                                                                                   | At5g48690              | similar to ubiquitin-associated protein                                  | 0.0474               | 0.0341               | 1       | 5.95                     | -1.23              | -1.11 | Ubiquitin like conjugating enzyme activity                                             |
| 261573_at                                                                                                                                                                                   | At1g01180              | Expressed Protein                                                        | 0.0476               | 0.0475               | 1       | 4.25                     | -2.63              | -3.24 | Unknown proteins                                                                       |
| 262718_at                                                                                                                                                                                   | At1g43570              | Expressed protein                                                        | 0.0390               | 0.0023               | 1       | 4.09                     | -1.37              | -2.22 | Unknown proteins                                                                       |
| 262369_at                                                                                                                                                                                   | At1g73010              | Expressed protein                                                        | 0.0390               | 0.0013               | 1       | 2.60                     | 1.50               | 1.35  | Unknown proteins                                                                       |

|           |           |                      |        |        |   |      |       |       |                  |
|-----------|-----------|----------------------|--------|--------|---|------|-------|-------|------------------|
| 263094_at | At2g16020 | Hypothetical Protein | 0.0475 | 0.0262 | 1 | 3.04 | -4.20 | -3.95 | Unknown proteins |
| 258703_at | At3g09750 | Expressed protein    | 0.0471 | 0.0339 | 1 | 4.14 | -1.30 | -1.30 | Unknown proteins |
| 255399_at | At4g03750 | Hypothetical protein | 0.0388 | 0.0008 | 1 | 8.43 | -1.79 | -2.27 | Unknown proteins |
| 253689_at | At4g29770 | Expressed protein    | 0.0496 | 0.0426 | 1 | 4.67 | -1.82 | -2.44 | Unknown proteins |
| 247599_at | At5g60880 | Expressed protein    | 0.0475 | 0.0364 | 1 | 5.93 | -1.41 | -1.96 | Unknown proteins |

**CLUSTER 2: Majority of the genes significantly induced ( $q$ -value  $\leq 0.05$ ;  $\geq 2.5$ ) at 3 hpt followed by significant repression ( $q$ -value  $\leq 0.05$ ;  $\leq 2.5$ ) at 6hpt and repression at 12 hpt.**

|             |           |                                                               |        |        |   |       |       |       |                                                                                        |
|-------------|-----------|---------------------------------------------------------------|--------|--------|---|-------|-------|-------|----------------------------------------------------------------------------------------|
| 259962_at   | At1g53690 | Dna-Directed RNA Polymerases I, Ii, And Iii Putative          | 0.0390 | 0.0033 | 2 | 10.13 | -4.00 | 2.38  | Cell Cycle/ DNA processing/chromatin regulation and cytoskeleton reorganization        |
| 254205_at   | At4g24170 | Kinesin Motor Family Protein                                  | 0.0425 | 0.0078 | 2 | 10.70 | -2.63 | 1.18  | Cell Cycle/ DNA processing/chromatin regulation and cytoskeleton reorganization        |
| 257233_at   | At3g15050 | Calmodulin-Binding Family Protein                             | 0.0445 | 0.0145 | 2 | 2.70  | -5.88 | -1.85 | Cellular communication/Signal transduction mechanism/transmembrane signal transduction |
| 250682_x_at | At5g06630 | Extensin-Like Family Protein                                  | 0.0474 | 0.0308 | 2 | 2.11  | -8.25 | -5.11 | Development/storage proteins                                                           |
| 245267_at   | At4g14060 | Major Latex Protein-Related / Mlp-Related                     | 0.0407 | 0.0054 | 2 | 2.66  | -6.08 | -1.76 | Development/storage proteins                                                           |
| 248658_at   | At5g48600 | Structural Maintenance Of Chromosomes (Smc) Family Protein    | 0.0465 | 0.0238 | 2 | 1.13  | -3.33 | -1.30 | Development/storage proteins                                                           |
| 261923_at   | At1g22380 | Udp-Glucuronosyl/Udp-Glucosyl Transferase Family Protein      | 0.0493 | 0.0463 | 2 | 1.51  | -6.55 | -3.14 | Matrix polymers                                                                        |
| 253962_at   | At4g26460 | Similar To S-Adenosyl-L-Methionine Carboxyl Methyltransferase | 0.0475 | 0.0351 | 2 | 1.25  | -5.56 | -1.33 | Primary /secondary metabolism                                                          |
| 254065_at   | At4g25420 | Gibberellin 20-Oxidase                                        | 0.0474 | 0.0296 | 2 | 1.50  | -4.00 | -1.61 | Primary /secondary metabolism                                                          |
| 262184_at   | At1g77910 | NADH Dehydrogenase                                            | 0.0477 | 0.0489 | 2 | 10.21 | -2.44 | 1.19  | Primary /secondary metabolism                                                          |
| 262333_at   | At1g64020 | Serine Protease Inhibitor-Related                             | 0.0475 | 0.0372 | 2 | 1.11  | -4.76 | -1.47 | Protein fate                                                                           |
| 249571_at   | At5g37620 | Dc1 Domain-Containing Protein                                 | 0.0390 | 0.0025 | 2 | 2.81  | -4.76 | -1.22 | Proteins with binding function or cofactor requirement                                 |
| 254771_at   | At4g13380 | Heavy-Metal-Associated Domain-Containing Protein              | 0.0475 | 0.0378 | 2 | 6.90  | -4.00 | 1.34  | Proteins with binding function or cofactor requirement                                 |
| 258028_at   | At3g27473 | Dc1 Domain-Containing Protein                                 | 0.0479 | 0.0397 | 2 | 3.61  | -3.70 | -1.39 | Proteins with binding function or cofactor requirement                                 |
| 246963_at   | At5g24820 | Dna-Binding Protein Cnd41, Putative                           | 0.0468 | 0.0267 | 2 | 3.27  | -3.03 | -1.05 | Proteins with binding function or cofactor requirement                                 |
| 245726_at   | At1g73360 | Lipid-Binding Start Domain-Containing Protein                 | 0.0482 | 0.0409 | 2 | 1.02  | -2.94 | -1.41 | Proteins with binding function or cofactor requirement                                 |
| 259201_at   | At3g09080 | Transducin family protein                                     | 0.0474 | 0.0345 | 2 | 5.82  | -1.92 | 1.31  | Proteins with binding function or cofactor requirement                                 |
| 256395_at   | At3g06120 | Basic Helix-Loop-Helix (BHLH) Family Protein                  | 0.0397 | 0.0035 | 2 | 2.75  | -8.17 | -1.53 | Transcription/splicing/RNA processing                                                  |
| 254855_s_at | At4g12140 | Zinc Finger (C3He4-Type Ring Finger) Family Protein           | 0.0405 | 0.0050 | 2 | 2.58  | -4.61 | -2.84 | Transcription/splicing/RNA processing                                                  |
| 266886_at   | At2g44745 | Wryk Family Transcription Factor                              | 0.0466 | 0.0249 | 2 | 2.49  | -4.55 | -1.09 | Transcription/splicing/RNA processing                                                  |
| 245707_at   | At5g04400 | Nac2-Like Protein                                             | 0.0494 | 0.0470 | 2 | 3.08  | -3.23 | -1.33 | Transcription/splicing/RNA processing                                                  |
| 248212_at   | At5g54020 | Zinc Finger Protein-Like, Chp Type                            | 0.0441 | 0.0127 | 2 | 3.09  | -2.78 | 1.18  | Transcription/splicing/RNA processing                                                  |
| 266148_x_at | At2g12240 | Cacta-Like Transposase Family (Pta/En/Spm)                    | 0.0475 | 0.0335 | 2 | 1.49  | -5.88 | -1.15 | Transposable elements, viral and plasmid proteins                                      |
| 255463_at   | At4g02960 | Copia-Like Retrotransposon Family                             | 0.0445 | 0.0163 | 2 | 7.56  | -5.19 | -1.94 | Transposable elements, viral and plasmid proteins                                      |
| 265004_at   | At1g26990 | Copia-Like Retrotransposon Family                             | 0.0448 | 0.0192 | 2 | 3.36  | -4.04 | -1.95 | Transposable elements, viral and plasmid proteins                                      |
| 257367_at   | At2g25780 | Hypothetical Protein                                          | 0.0390 | 0.0016 | 2 | 3.92  | -5.26 | -1.49 | Unknown proteins                                                                       |
| 246642_s_at | At5g34920 | Unknown Protein                                               | 0.0409 | 0.0176 | 2 | 4.90  | -4.62 | 1.05  | Unknown proteins                                                                       |
| 252696_at   | At3g43650 | Unknown Protein                                               | 0.0445 | 0.0182 | 2 | 4.13  | -4.04 | -1.16 | Unknown proteins                                                                       |
| 257302_at   | At3g30220 | Expressed Protein                                             | 0.0434 | 0.0091 | 2 | 3.52  | -3.57 | 1.12  | Unknown proteins                                                                       |
| 251003_at   | At5g02690 | Expressed Protein                                             | 0.0465 | 0.0244 | 2 | 1.67  | -2.56 | -1.25 | Unknown proteins                                                                       |
| 266128_at   | At2g45000 | Expressed protein                                             | 0.0401 | 0.0042 | 2 | 6.49  | -1.28 | 1.02  | Unknown proteins                                                                       |
| 250174_at   | At5g14380 | Arabinogalactan-Protein, Agp6                                 | 0.0466 | 0.0258 | 2 | 7.52  | -2.70 | 1.52  | Structural proteins                                                                    |

**CLUSTER 3: Majority of the genes induced at 3 hpt and significantly induced ( $q$ -value  $\leq 0.05$ ;  $\geq 2.5$ ) at 6hpt followed by significant repression ( $q$ -value  $\leq 0.05$ ;  $\leq 2.5$ ) at 12hpt**

|             |           |                                                        |        |        |   |       |      |       |                                                                                        |
|-------------|-----------|--------------------------------------------------------|--------|--------|---|-------|------|-------|----------------------------------------------------------------------------------------|
| 253066_at   | At4g37770 | 1-Aminocyclopropane-1-Carboxylate Synthase, Putative   | 0.0482 | 0.0414 | 3 | -2.54 | 2.87 | -8.84 | Carbohydrate/soluble sugar/starch/aminoacid metabolism                                 |
| 253142_at   | At4g35520 | Dna Mismatch Repair Family Protein                     | 0.0475 | 0.0370 | 3 | -1.38 | 1.00 | -3.32 | Cell Cycle/ DNA processing/chromatin regulation and cytoskeleton reorganization        |
| 265410_at   | At2g16620 | Protein Kinase-Related                                 | 0.0495 | 0.0485 | 3 | -1.85 | 3.41 | -5.56 | Cellular communication/Signal transduction mechanism/transmembrane signal transduction |
| 260514_at   | At1g51480 | Disease Resistance Protein, CC-NBS-LRR class, Putative | 0.0482 | 0.0406 | 3 | -1.02 | 5.48 | -6.25 | Defence and virulence                                                                  |
| 253627_at   | At4g30650 | Hydrophobic protein, putative                          | 0.0401 | 0.0043 | 3 | 1.35  | 5.25 | -1.59 | Defence and virulence                                                                  |
| 254905_at   | At4g11170 | Disease Resistance Protein, TIR-NBS-LRR, Putative      | 0.0498 | 0.0497 | 3 | -1.06 | 2.65 | -3.13 | Defence and virulence                                                                  |
| 247016_at   | At5g66970 | Signal recognition particle 54 K protein               | 0.0448 | 0.0194 | 3 | 1.93  | 8.47 | -1.11 | Development/storage proteins                                                           |
| 265949_at   | At2g18540 | Cupin Family Protein                                   | 0.0494 | 0.0470 | 3 | -1.25 | 6.88 | -5.00 | Development/storage proteins                                                           |
| 250474_at   | At5g10230 | Annexin 7; Ann7                                        | 0.0428 | 0.0083 | 3 | -1.43 | 4.16 | -5.00 | Development/storage proteins                                                           |
| 255258_at   | At4g05060 | Vesicle Associated Membrane Family Protein             | 0.0445 | 0.0174 | 3 | 1.10  | 5.13 | -3.48 | Intracellular membrane/membrane bound                                                  |
| 267094_at   | At2g38080 | Diphenol Oxidase, Putative                             | 0.0485 | 0.0422 | 3 | 1.16  | 6.26 | -3.85 | Primary /secondary metabolism                                                          |
| 258121_s_at | At3g14530 | Geranylgeranyl Pyrophosphate Synthase, Putative        | 0.0448 | 0.0195 | 3 | -1.79 | 5.64 | -5.26 | Primary /secondary metabolism                                                          |
| 248013_at   | At5g56330 | Carbonic Anhydrase Family Protein                      | 0.0474 | 0.0307 | 3 | 1.20  | 4.97 | -2.70 | Primary /secondary metabolism                                                          |
| 261029_at   | At1g17330 | Metal-dependent phosphohydrolase protein               | 0.0417 | 0.0068 | 3 | 1.19  | 3.60 | -1.52 | Primary /secondary metabolism                                                          |
| 259206_at   | At3g09040 | Pentatricopeptide (Ppr) Repeat-Containing Protein      | 0.0388 | 0.0008 | 3 | -1.10 | 1.79 | -3.22 | Primary /secondary metabolism                                                          |
| 260032_at   | At1g68750 | Phosphoenolpyruvate Carboxylase Family Protein         | 0.0458 | 0.0225 | 3 | -2.05 | 1.28 | -3.17 | Primary /secondary metabolism                                                          |

|             |           |                                                     |        |        |   |       |       |        |                                                        |
|-------------|-----------|-----------------------------------------------------|--------|--------|---|-------|-------|--------|--------------------------------------------------------|
| 250162_at   | At5g15250 | FtsH protease, putative                             | 0.0479 | 0.0398 | 3 | 1.56  | 10.47 | -1.75  | Protein fate                                           |
| 263245_at   | At2g31470 | F-Box Family Protein                                | 0.0485 | 0.0422 | 3 | 2.29  | 8.79  | -2.78  | Protein fate                                           |
| 255256_at   | At4g05080 | F-Box Family Protein                                | 0.0497 | 0.0496 | 3 | -2.12 | 4.89  | -5.53  | Protein fate                                           |
| 251512_at   | At3g59190 | F-Box Family Protein                                | 0.0475 | 0.0359 | 3 | -1.12 | 2.31  | -3.85  | Protein fate                                           |
| 256999_at   | At3g14200 | DNAJ heat shock protein                             | 0.0482 | 0.0413 | 3 | 1.45  | 10.29 | -2.08  | Protein folding/heat shock/chaperone activity          |
| 258068_at   | At3g25990 | Dna-Binding Protein Gt-1-Related                    | 0.0471 | 0.0274 | 3 | 1.21  | 6.32  | -2.86  | Proteins with binding function or cofactor requirement |
| 264562_at   | At1g55760 | Btb/Poz Domain-Containing Protein                   | 0.0445 | 0.0162 | 3 | -1.56 | 5.89  | -5.00  | Proteins with binding function or cofactor requirement |
| 262303_at   | At1g70930 | Homeobox protein, putative                          | 0.0490 | 0.0450 | 3 | 1.56  | 4.29  | -1.10  | Proteins with binding function or cofactor requirement |
| 245538_at   | At4g15200 | Fh2 Domain Containing Protein                       | 0.0434 | 0.0097 | 3 | -1.32 | 4.26  | -6.15  | Proteins with binding function or cofactor requirement |
| 266730_at   | At2g03110 | RNA binding Protein, Putative                       | 0.0475 | 0.0329 | 3 | -1.89 | 3.52  | -3.86  | Proteins with binding function or cofactor requirement |
| 257531_at   | At3g07240 | RNA binding Protein, Putative                       | 0.0497 | 0.0495 | 3 | -1.03 | 3.24  | -5.56  | Proteins with binding function or cofactor requirement |
| 253366_at   | At4g33180 | Hydrolase family protein                            | 0.0484 | 0.0417 | 3 | 1.31  | 4.09  | -1.09  | Re-assembly of cell wall associated genes              |
| 264786_at   | At2g17920 | Zinc Finger Protein                                 | 0.0445 | 0.0145 | 3 | 1.86  | 6.88  | -3.33  | Transcription/splicing/RNA processing                  |
| 264294_at   | At1g78750 | Heat shock transcription factor-like                | 0.0475 | 0.0355 | 3 | 1.10  | 6.41  | -2.04  | Transcription/splicing/RNA processing                  |
| 257488_s_at | At4g00070 | Zinc finger protein, related                        | 0.0475 | 0.0372 | 3 | 1.26  | 5.99  | -2.38  | Transcription/splicing/RNA processing                  |
| 263723_at   | At2g13500 | Zinc finger protein                                 | 0.0494 | 0.0427 | 3 | 2.08  | 4.66  | -2.44  | Transcription/splicing/RNA processing                  |
| 264945_at   | At1g77070 | MADS-box protein MADS2, putative                    | 0.0493 | 0.0457 | 3 | 1.02  | 3.25  | -1.19  | Transcription/splicing/RNA processing                  |
| 257656_at   | At3g13228 | Zinc Finger (C3Hc4-Type Ring Finger) Family Protein | 0.0474 | 0.0309 | 3 | -1.51 | 2.08  | -7.82  | Transcription/splicing/RNA processing                  |
| 262855_at   | At1g20860 | Phosphate transporter family protein                | 0.0409 | 0.0060 | 3 | 1.35  | 4.79  | -1.25  | Transporters                                           |
| 263742_at   | At2g20625 | Expressed protein                                   | 0.0390 | 0.0027 | 3 | 2.19  | 9.64  | -1.02  | Unknown proteins                                       |
| 263027_at   | At1g24010 | Expressed Protein                                   | 0.0405 | 0.0049 | 3 | 1.77  | 8.86  | -9.09  | Unknown proteins                                       |
| 263781_at   | At2g46360 | Expressed Protein                                   | 0.0445 | 0.0159 | 3 | 2.19  | 7.61  | -2.70  | Unknown proteins                                       |
| 254383_at   | At4g21950 | Expressed Protein                                   | 0.0475 | 0.0363 | 3 | 1.76  | 6.79  | -2.65  | Unknown proteins                                       |
| 253289_at   | At4g34320 | Expressed protein                                   | 0.0405 | 0.0048 | 3 | 1.76  | 6.29  | -1.82  | Unknown proteins                                       |
| 261779_at   | At1g76230 | Expressed Protein                                   | 0.0494 | 0.0431 | 3 | -1.04 | 4.80  | -3.85  | Unknown proteins                                       |
| 255392_at   | At4g03680 | Expressed Protein                                   | 0.0475 | 0.0471 | 3 | -5.39 | 4.70  | -10.05 | Unknown proteins                                       |
| 265834_at   | At2g14410 | Unknown protein                                     | 0.0445 | 0.0145 | 3 | 1.06  | 4.46  | -2.00  | Unknown proteins                                       |
| 246729_at   | At5g28070 | Hypothetical Protein                                | 0.0445 | 0.0151 | 3 | -1.49 | 4.31  | -6.87  | Unknown proteins                                       |
| 245153_at   | At5g12450 | Expressed Protein                                   | 0.0479 | 0.0298 | 3 | -1.08 | 4.05  | -3.70  | Unknown proteins                                       |
| 252661_at   | At3g44450 | Expressed protein                                   | 0.0390 | 0.0022 | 3 | 1.25  | 2.87  | -1.22  | Unknown proteins                                       |
| 255085_at   | At4g09290 | Expressed Protein                                   | 0.0407 | 0.0163 | 3 | -5.07 | 2.55  | -8.07  | Unknown proteins                                       |
| 246605_at   | At5g35340 | Unknown Protein                                     | 0.0465 | 0.0246 | 3 | -1.61 | 2.34  | -5.00  | Unknown proteins                                       |

**CLUSTER 4: Majority of the genes significantly repressed ( $q$ -value  $\leq 0.05$ ;  $\leq 2.5$ ) at 3hpt and induced at 6 or 12 hpt**

|             |           |                                                         |        |        |   |        |       |       |                                                                                        |
|-------------|-----------|---------------------------------------------------------|--------|--------|---|--------|-------|-------|----------------------------------------------------------------------------------------|
| 249572_at   | At5g37630 | Chromosome condensation family protein                  | 0.0466 | 0.0261 | 4 | -1.49  | 2.24  | 3.92  | Cell Cycle/ DNA processing/chromatin regulation and cytoskeleton reorganization        |
| 257106_at   | At3g29060 | Exs Family Protein / Erd1/Xpr1/Syg1 Family Protein      | 0.0485 | 0.0426 | 4 | -8.38  | -1.68 | -1.23 | Cellular communication/Signal transduction mechanism/transmembrane signal transduction |
| 257718_at   | At3g18400 | No Apical Meristem (Nam) Family Protein                 | 0.0474 | 0.0306 | 4 | -5.00  | -2.86 | -1.04 | Development/storage proteins                                                           |
| 251694_s_at | At3g56560 | No Apical Meristem (Nam) Family Protein                 | 0.0477 | 0.0391 | 4 | -4.20  | 1.50  | 1.76  | Development/storage proteins                                                           |
| 260463_at   | At1g10930 | Helicase                                                | 0.0495 | 0.0483 | 4 | -4.17  | 1.68  | 2.89  | Helicase activity                                                                      |
| 248729_at   | At5g48010 | Pentacyclic Triterpene Synthase, Putative               | 0.0475 | 0.0361 | 4 | -6.27  | 1.22  | 1.68  | Primary/secondary metabolism                                                           |
| 266164_at   | At2g28050 | Pentatricopeptide (Ppr) Repeat-Containing Protein       | 0.0465 | 0.0237 | 4 | -5.88  | -1.18 | 1.11  | Primary/secondary metabolism                                                           |
| 248536_at   | At5g50140 | Ankyrin Repeat Family Protein                           | 0.0441 | 0.0112 | 4 | -5.88  | -1.72 | 1.41  | Primary/secondary metabolism                                                           |
| 252780_at   | At3g42960 | Alcohol Dehydrogenase (Ata1)                            | 0.0474 | 0.0301 | 4 | -4.93  | -1.62 | -1.44 | Primary/secondary metabolism                                                           |
| 258670_at   | At3g08810 | Kelch Repeat-Containing F-Box Family Protein            | 0.0425 | 0.0080 | 4 | -4.74  | 1.11  | 1.58  | Protein fate                                                                           |
| 264966_at   | At1g60570 | Kelch Repeat-Containing F-Box Family Protein            | 0.0434 | 0.0096 | 4 | -2.50  | 1.09  | 1.96  | Protein fate                                                                           |
| 252994_at   | At4g38480 | Transducin Family Protein / Wd-40 Repeat Family Protein | 0.0445 | 0.0154 | 4 | -7.24  | -2.56 | 1.40  | Proteins with binding function or cofactor requirement                                 |
| 252367_at   | At3g48360 | Speckle-Type Poz Protein-Related                        | 0.0485 | 0.0420 | 4 | -4.17  | -1.35 | 1.09  | Proteins with binding function or cofactor requirement                                 |
| 260921_at   | At1g21540 | AMP-binding protein, putative                           | 0.0460 | 0.0228 | 4 | -2.22  | 1.68  | 5.50  | Proteins with binding function or cofactor requirement                                 |
| 252930_at   | At4g39010 | Glycosyl Hydrolase Family 9 Protein                     | 0.0473 | 0.0279 | 4 | -3.45  | 1.04  | 2.59  | Re-assembly of cell wall associated genes                                              |
| 251250_at   | At3g62180 | Pectin methylesterase, putative                         | 0.0448 | 0.0200 | 4 | -2.38  | 2.64  | 1.92  | Re-assembly of cell wall associated genes                                              |
| 248859_at   | At5g46660 | CHP-Rich Zinc Finger Protein, Putative                  | 0.0474 | 0.0308 | 4 | -6.67  | -1.41 | -1.32 | Transcription/splicing/RNA processing                                                  |
| 257740_at   | At3g27330 | Zinc Finger (C3Hc4-Type Ring Finger) Family Protein     | 0.0475 | 0.0372 | 4 | -6.25  | 1.26  | 1.78  | Transcription/splicing/RNA processing                                                  |
| 246790_at   | At5g27610 | Myb Family Transcription Factor                         | 0.0453 | 0.0210 | 4 | -5.26  | -1.04 | 3.43  | Transcription/splicing/RNA processing                                                  |
| 246520_at   | At5g15790 | Zinc Finger (C3Hc4-Type Ring Finger) Family Protein     | 0.0475 | 0.0375 | 4 | -4.00  | 1.74  | 1.27  | Transcription/splicing/RNA processing                                                  |
| 255359_at   | At4g03950 | Glucose-6-Phosphate/Phosphate Translocator, Putative    | 0.0390 | 0.0017 | 4 | -9.89  | 2.14  | 1.72  | Transporters                                                                           |
| 265955_at   | At2g37280 | Abc Transporter Family Protein                          | 0.0465 | 0.0241 | 4 | -3.57  | -1.11 | 1.34  | Transporters                                                                           |
| 265783_at   | At2g07450 | Gypsy-Like Retrotransposon Family (Athila)              | 0.0405 | 0.0048 | 4 | -12.50 | 1.32  | 1.18  | Transposable elements, viral and plasmid proteins                                      |

|             |           |                                   |        |        |   |        |      |      |                                                   |
|-------------|-----------|-----------------------------------|--------|--------|---|--------|------|------|---------------------------------------------------|
| 263389_at   | At2g11680 | Gypsy-Like Retrotransposon Family | 0.0466 | 0.0257 | 4 | -5.00  | 1.21 | 2.00 | Transposable elements, viral and plasmid proteins |
| 266251_s_at | At2g27540 | Expressed Protein                 | 0.0460 | 0.0227 | 4 | -14.29 | 1.31 | 1.04 | Unknown proteins                                  |
| 257111_x_at | At3g30450 | Hypothetical Protein              | 0.0455 | 0.0216 | 4 | -9.09  | 2.07 | 1.17 | Unknown proteins                                  |
| 258442_at   | At3g01015 | Expressed Protein                 | 0.0475 | 0.0365 | 4 | -7.14  | 1.78 | 3.50 | Unknown proteins                                  |
| 254138_at   | At4g24950 | Expressed Protein                 | 0.0435 | 0.0101 | 4 | -5.56  | 1.73 | 1.26 | Unknown proteins                                  |
| 246365_at   | At1g39750 | Unknown Protein                   | 0.0434 | 0.0062 | 4 | -4.76  | 2.20 | 3.18 | Unknown proteins                                  |
| 252741_at   | At3g43280 | Expressed Protein                 | 0.0473 | 0.0279 | 4 | -4.35  | 2.15 | 1.46 | Unknown proteins                                  |
| 260715_at   | At1g48200 | Expressed Protein                 | 0.0445 | 0.0143 | 4 | -3.85  | 1.53 | 1.57 | Unknown proteins                                  |
| 246811_at   | At5g27170 | Expressed Protein                 | 0.0482 | 0.0407 | 4 | -3.23  | 1.37 | 3.66 | Unknown proteins                                  |
| 254908_at   | At4g11200 | Expressed Protein                 | 0.0474 | 0.0298 | 4 | -3.03  | 1.88 | 1.87 | Unknown proteins                                  |
| 249756_at   | At5g24313 | Expressed Protein                 | 0.0453 | 0.0204 | 4 | -2.86  | 2.27 | 3.84 | Unknown proteins                                  |
| 251129_at   | At5g01150 | Hypothetical Protein              | 0.0475 | 0.0463 | 4 | -2.70  | 1.47 | 2.61 | Unknown proteins                                  |
| 261414_at   | At1g07795 | Expressed protein                 | 0.0475 | 0.0318 | 4 | -1.92  | 1.24 | 3.24 | Unknown proteins                                  |
| 254484_at   | At4g20750 | Unknown protein                   | 0.0475 | 0.0355 | 4 | -1.72  | 1.04 | 3.64 | Unknown proteins                                  |
| 248941_s_at | At5g45460 | Expressed protein                 | 0.0457 | 0.0219 | 4 | -1.72  | 1.08 | 4.22 | Unknown proteins                                  |
| 257901_at   | At3g28440 | Unknown protein                   | 0.0441 | 0.0092 | 4 | -1.39  | 1.11 | 4.25 | Unknown proteins                                  |

**CLUSTER 5: Majority of the genes induced at 3hpt and significantly repressed ( $q$ -value  $\leq 0.05$ ;  $\leq 2.5$ ) at 6 hpt followed by induction at 12 hpt**

|             |           |                                                                |        |        |   |       |        |       |                                                                                        |
|-------------|-----------|----------------------------------------------------------------|--------|--------|---|-------|--------|-------|----------------------------------------------------------------------------------------|
| 246776_at   | At5g27550 | Kinesin Motor Protein-Related                                  | 0.0458 | 0.0225 | 5 | -1.23 | -8.33  | -1.22 | Cell Cycle/ DNA processing/chromatin regulation and cytoskeleton reorganization        |
| 250997_at   | At5g02570 | Histone H2B, Putative                                          | 0.0390 | 0.0028 | 5 | 1.44  | -7.69  | 3.22  | Cell Cycle/ DNA processing/chromatin regulation and cytoskeleton reorganization        |
| 257229_at   | At3g16490 | Calmodulin-Binding Family Protein                              | 0.0495 | 0.0485 | 5 | 4.01  | -8.62  | 2.48  | Cellular communication/Signal transduction mechanism/transmembrane signal transduction |
| 247776_at   | At5g58700 | Phospholipase C                                                | 0.0465 | 0.0247 | 5 | 1.41  | -5.26  | 2.64  | Cellular communication/Signal transduction mechanism/transmembrane signal transduction |
| 250037_at   | At5g18350 | Disease Resistance Protein (TIR-NBS-LRR class), Putative       | 0.0469 | 0.0485 | 5 | -1.15 | -16.72 | -2.91 | Defence and virulence                                                                  |
| 261737_at   | At1g47885 | Disease Resistance Protein, Putative                           | 0.0460 | 0.0228 | 5 | 2.81  | -6.67  | 2.21  | Defence and virulence                                                                  |
| 260052_at   | At1g78220 | 14-3-3 Protein Gfl4 Pi; Gfl3                                   | 0.0414 | 0.0065 | 5 | 2.81  | -6.67  | 1.41  | Defence and virulence                                                                  |
| 263683_at   | At1g26870 | No Apical Meristem (Nam) Family Protein                        | 0.0475 | 0.0350 | 5 | 1.44  | -3.57  | 1.92  | Development/storage proteins                                                           |
| 261343_s_at | At3g43350 | Helicase-Related                                               | 0.0445 | 0.0160 | 5 | 1.39  | -10.00 | 3.17  | Helicase activity                                                                      |
| 246734_at   | At5g27680 | Dead/Deah Box Helicase, Putative                               | 0.0475 | 0.0334 | 5 | 1.94  | -4.76  | 1.37  | Helicase activity                                                                      |
| 265329_at   | At2g18450 | Succinate Dehydrogenase                                        | 0.0445 | 0.0178 | 5 | 1.61  | -6.63  | 1.15  | Primary /secondary metabolism                                                          |
| 253149_at   | At4g35650 | Nad+ Isocitrate Dehydrogenase, Putative                        | 0.0424 | 0.0072 | 5 | 2.22  | -4.55  | 1.67  | Primary /secondary metabolism                                                          |
| 266751_at   | At2g47020 | Peptide Chain Release Factor, Putative                         | 0.0445 | 0.0158 | 5 | 1.11  | -4.17  | 1.68  | Primary /secondary metabolism                                                          |
| 253743_at   | At4g28940 | Nucleosidase-Related                                           | 0.0441 | 0.0118 | 5 | 1.36  | -3.03  | 1.01  | Primary /secondary metabolism                                                          |
| 263061_at   | At2g18190 | Aaa-Type Atpase Family Protein                                 | 0.0494 | 0.0478 | 5 | -1.28 | -2.84  | -1.63 | Primary /secondary metabolism                                                          |
| 261241_at   | At1g32950 | Subtilase Family Protein                                       | 0.0397 | 0.0034 | 5 | 1.40  | -4.17  | 2.25  | Protein fate                                                                           |
| 259631_at   | At1g56410 | Heat Shock Cognate 70 Kda Protein, Putative                    | 0.0445 | 0.0155 | 5 | 1.20  | -5.88  | 1.69  | Protein folding/heat shock/chaperone activity                                          |
| 252259_at   | At3g49460 | 60S Acidic Ribosomal Protein-Related                           | 0.0466 | 0.0256 | 5 | 1.38  | -6.17  | 2.83  | Protein synthesis and translation                                                      |
| 261435_at   | At1g07620 | Gtp-Binding Protein, Putative                                  | 0.0447 | 0.0183 | 5 | 3.52  | -11.11 | 1.13  | Proteins with binding function or cofactor requirement                                 |
| 247941_at   | At5g57200 | Enth Domain-Containing Protein                                 | 0.0461 | 0.0230 | 5 | 2.82  | -11.11 | 2.00  | Proteins with binding function or cofactor requirement                                 |
| 253853_at   | At4g28130 | Diacylglycerol Kinase Accessory Domain-Containing Protein      | 0.0495 | 0.0485 | 5 | 1.38  | -3.41  | 1.21  | Proteins with binding function or cofactor requirement                                 |
| 255517_at   | At4g02290 | Glycosyl Hydrolase Family 9 Protein                            | 0.0447 | 0.0183 | 5 | -1.04 | -11.11 | -2.38 | Re-assembly of cell wall associated genes                                              |
| 257629_at   | At3g26140 | Glycosyl Hydrolase Family 5 Protein / Cellulase Family Protein | 0.0482 | 0.0414 | 5 | 1.09  | -4.73  | 2.57  | Re-assembly of cell wall associated genes                                              |
| 263281_at   | At2g14160 | RNA Recognition Motif (Rrm)-Containing Protein                 | 0.0445 | 0.0174 | 5 | -1.93 | -14.45 | -2.86 | Transcription/splicing/RNA processing                                                  |
| 267091_at   | At2g38185 | Zinc Finger (C3Hc4-Type Ring Finger) Family Protein            | 0.0448 | 0.0197 | 5 | 1.56  | -4.55  | 1.47  | Transcription/splicing/RNA processing                                                  |
| 252578_at   | At3g45480 | Zinc Finger (C3Hc4-Type Ring Finger) Family Protein            | 0.0475 | 0.0318 | 5 | 3.10  | -4.35  | 2.27  | Transcription/splicing/RNA processing                                                  |
| 247035_at   | At5g67110 | Basic Helix-Loop-Helix (BHLH) Family Protein                   | 0.0473 | 0.0282 | 5 | -1.30 | -4.00  | -2.08 | Transcription/splicing/RNA processing                                                  |
| 263092_at   | At2g16210 | Transcriptional Factor B3 Family Protein                       | 0.0475 | 0.0319 | 5 | 1.31  | -3.87  | 1.58  | Transcription/splicing/RNA processing                                                  |
| 260263_at   | At1g68480 | Zinc Finger (C2H2 Type) Family Protein                         | 0.0445 | 0.0175 | 5 | 1.58  | -3.03  | 2.44  | Transcription/splicing/RNA processing                                                  |
| 259846_at   | At1g72140 | Proton-Dependent Oligopeptide Transport (Pot) Family Protein   | 0.0493 | 0.0466 | 5 | 1.23  | -4.35  | 2.33  | Transporters                                                                           |
| 264104_at   | At2g13750 | Cacta-Like Transposase Family (Pta/En/Spm)                     | 0.0492 | 0.0454 | 5 | 1.40  | -12.50 | -2.27 | Transposable elements, viral and plasmid proteins                                      |
| 255188_at   | At4g07340 | Replication Protein-Related                                    | 0.0401 | 0.0043 | 5 | 2.34  | -10.28 | -1.28 | Transposable elements, viral and plasmid proteins                                      |
| 256845_x_at | At3g31970 | Gypsy-Like Retrotransposon Family                              | 0.0476 | 0.0387 | 5 | -1.15 | -2.63  | -1.41 | Transposable elements, viral and plasmid proteins                                      |
| 261645_at   | At1g27790 | Hypothetical Protein                                           | 0.0494 | 0.0475 | 5 | 1.53  | -14.30 | 1.09  | Unknown proteins                                                                       |
| 249531_at   | At5g38770 | Hypothetical Protein                                           | 0.0447 | 0.0185 | 5 | 1.28  | -8.76  | 2.30  | Unknown proteins                                                                       |
| 252784_at   | At3g43040 | Unknown Protein                                                | 0.0475 | 0.0333 | 5 | 2.02  | -8.33  | 1.66  | Unknown proteins                                                                       |
| 267166_at   | At2g37720 | Expressed Protein                                              | 0.0441 | 0.0128 | 5 | 1.21  | -4.76  | 1.56  | Unknown proteins                                                                       |
| 254240_at   | At4g23496 | Expressed Protein                                              | 0.0478 | 0.0394 | 5 | 1.58  | -3.73  | 1.20  | Unknown proteins                                                                       |
| 255348_at   | At4g03820 | Expressed Protein                                              | 0.0474 | 0.0295 | 5 | 1.36  | -3.70  | 1.58  | Unknown proteins                                                                       |

|             |           |                   |        |        |   |      |       |      |                  |
|-------------|-----------|-------------------|--------|--------|---|------|-------|------|------------------|
| 252665_at   | At3g44140 | Expressed Protein | 0.0449 | 0.0203 | 5 | 1.06 | -3.13 | 1.09 | Unknown proteins |
| 266754_at   | At2g46980 | Expressed Protein | 0.0425 | 0.0079 | 5 | 1.97 | -3.03 | 2.18 | Unknown proteins |
| 264735_s_at | At1g62060 | Expressed Protein | 0.0475 | 0.0460 | 5 | 1.76 | -2.96 | 2.68 | Unknown proteins |
| 254769_at   | At4g13330 | Expressed Protein | 0.0474 | 0.0294 | 5 | 1.76 | -2.86 | 1.32 | Unknown proteins |
| 253656_at   | At4g30090 | Expressed Protein | 0.0486 | 0.0392 | 5 | 2.34 | -2.86 | 3.01 | Unknown proteins |

**CLUSTER 6: Majority of the genes significantly repressed ( $q$ -value  $\leq 0.05$ ;  $\geq 2.5$ ) at 3hpt and significantly induced ( $q$ -value  $\leq 0.05$ ;  $\geq 2.5$ ) at 6 hpt followed by induction or repression at 12 hpt**

|           |           |                                                     |        |        |   |        |      |       |                                                                                        |
|-----------|-----------|-----------------------------------------------------|--------|--------|---|--------|------|-------|----------------------------------------------------------------------------------------|
| 252428_at | At3g47660 | Regulator Of Chromosome Condensation (Rcc1) Protein | 0.0466 | 0.0252 | 6 | -3.49  | 3.14 | 1.27  | Cell Cycle/ DNA processing/chromatin regulation and cytoskeleton reorganization        |
| 247192_at | At5g65360 | Histone H3                                          | 0.0434 | 0.0093 | 6 | -1.20  | 2.55 | 1.07  | Cell Cycle/ DNA processing/chromatin regulation and cytoskeleton reorganization        |
| 262004_at | At1g64480 | Calcineurin B-Like Protein 8 (Cbl8)                 | 0.0474 | 0.0310 | 6 | -4.87  | 1.74 | -1.60 | Cellular communication/Signal transduction mechanism/transmembrane signal transduction |
| 248989_at | At5g45200 | Disease resistance protein, TIR-NBS-LRRj            | 0.0431 | 0.0085 | 6 | -1.49  | 6.39 | 2.12  | Defence and virulence                                                                  |
| 266531_at | At2g16835 | Water Channel Protein, Putative                     | 0.0405 | 0.0046 | 6 | -5.00  | 7.66 | 1.66  | Development/storage proteins                                                           |
| 252840_at | At5g32630 | Putative Helicase                                   | 0.0445 | 0.0148 | 6 | -10.00 | 1.06 | -1.14 | Helicase activity                                                                      |
| 253502_at | At4g31940 | Cytochrome P450, Putative                           | 0.0405 | 0.0046 | 6 | -14.29 | 6.81 | -2.17 | Primary /secondary metabolism                                                          |
| 262465_at | At1g50270 | Pentatricopeptide (PPR) repeat-containing protein   | 0.0494 | 0.0468 | 6 | -1.37  | 6.27 | 2.04  | Primary /secondary metabolism                                                          |
| 256496_at | At1g31510 | F-Box Family Protein-Related                        | 0.0397 | 0.0038 | 6 | -5.56  | 5.22 | -2.13 | Protein fate                                                                           |
| 255149_at | At4g08150 | Homeobox Protein Knotted-1 Like 1 (Knat1)           | 0.0447 | 0.0186 | 6 | -9.21  | 1.73 | -2.63 | Proteins with binding function or cofactor requirement                                 |
| 250801_at | At5g04960 | Pectinesterase Family Protein                       | 0.0475 | 0.0331 | 6 | -2.50  | 5.98 | 1.09  | Re-assembly of cell wall associated genes                                              |
| 246798_at | At5g26930 | Zinc Finger (Gata Type) Family Protein              | 0.0441 | 0.0113 | 6 | -10.00 | 4.89 | 1.23  | Transcription/splicing/RNA processing                                                  |
| 256023_at | At1g58330 | Transcription Factor-Related                        | 0.0488 | 0.0442 | 6 | -4.12  | 1.13 | -1.08 | Transcription/splicing/RNA processing                                                  |
| 248188_at | At5g54070 | Heat Shock Transcription Factor Family Protein      | 0.0468 | 0.0267 | 6 | -2.94  | 5.72 | 1.36  | Transcription/splicing/RNA processing                                                  |
| 257811_at | At3g25280 | Nitrate transporter, putative                       | 0.0494 | 0.0479 | 6 | -1.33  | 5.21 | 1.35  | Transporters                                                                           |
| 255374_at | At4g03770 | Gypsy-Like Retrotransposon Family (Athila)          | 0.0474 | 0.0288 | 6 | -6.01  | 1.43 | -3.52 | Transposable elements, viral and plasmid proteins                                      |
| 262035_at | At1g37110 | Copia-Like Retrotransposon Family                   | 0.0475 | 0.0359 | 6 | -3.33  | 5.46 | 1.80  | Transposable elements, viral and plasmid proteins                                      |
| 263055_at | At2g04600 | Expressed Protein                                   | 0.0401 | 0.0041 | 6 | -20.00 | 4.48 | -1.30 | Unknown proteins                                                                       |
| 259566_at | At1g20520 | Expressed Protein                                   | 0.0441 | 0.0116 | 6 | -7.14  | 1.30 | -2.50 | Unknown proteins                                                                       |
| 250300_at | At5g11890 | Expressed Protein                                   | 0.0475 | 0.0336 | 6 | -5.88  | 1.82 | -1.52 | Unknown proteins                                                                       |
| 245420_at | At4g17410 | Expressed Protein                                   | 0.0434 | 0.0068 | 6 | -5.00  | 3.73 | -1.04 | Unknown proteins                                                                       |
| 256591_at | At3g31910 | Expressed Protein                                   | 0.0493 | 0.0404 | 6 | -4.17  | 2.95 | -1.02 | Unknown proteins                                                                       |
| 265745_at | At2g06640 | Unknown Protein                                     | 0.0493 | 0.0464 | 6 | -3.56  | 1.30 | -1.42 | Unknown proteins                                                                       |
| 253518_at | At4g31400 | Expressed Protein                                   | 0.0475 | 0.0353 | 6 | -3.37  | 1.24 | -1.64 | Unknown proteins                                                                       |
| 252889_at | At4g39380 | Expressed Protein                                   | 0.0441 | 0.0107 | 6 | -3.24  | 5.28 | 1.28  | Unknown proteins                                                                       |
| 256436_at | At3g11150 | Expressed Protein                                   | 0.0441 | 0.0113 | 6 | -3.10  | 5.85 | 1.04  | Unknown proteins                                                                       |
| 248598_at | At5g49370 | Hypothetical Protein                                | 0.0441 | 0.0100 | 6 | -2.56  | 4.37 | 1.78  | Unknown proteins                                                                       |

**CLUSTER 7: Majority of the genes induced at 3 and 6 hpt followed by significant repression ( $q$ -value  $\leq 0.05$ ;  $\geq 2.5$ ) at 12 hpt**

|             |           |                                                                   |        |        |   |       |       |        |                                                                                        |
|-------------|-----------|-------------------------------------------------------------------|--------|--------|---|-------|-------|--------|----------------------------------------------------------------------------------------|
| 250433_at   | At5g10400 | Histone H3                                                        | 0.0464 | 0.0235 | 7 | 1.81  | 3.40  | -11.11 | Cell Cycle/ DNA processing/chromatin regulation and cytoskeleton reorganization        |
| 262141_s_at | At1g52460 | Phospholipase                                                     | 0.0475 | 0.0373 | 7 | 1.88  | 1.96  | -12.64 | Cellular communication/Signal transduction mechanism/transmembrane signal transduction |
| 260061_at   | At1g73690 | Cell Division Protein Kinase, Putative                            | 0.0475 | 0.0345 | 7 | 1.12  | 4.45  | -5.26  | Cellular communication/Signal transduction mechanism/transmembrane signal transduction |
| 250443_at   | At5g10520 | Protein Kinase Family Protein                                     | 0.0441 | 0.0119 | 7 | 1.95  | 3.51  | -4.55  | Cellular communication/Signal transduction mechanism/transmembrane signal transduction |
| 255757_at   | At4g00460 | Kinase Partner Protein-Like                                       | 0.0481 | 0.0306 | 7 | 2.25  | 3.31  | -3.23  | Cellular communication/Signal transduction mechanism/transmembrane signal transduction |
| 246096_at   | At5g20330 | b-1,3-Glucanase; Bg4                                              | 0.0407 | 0.0055 | 7 | 2.29  | 5.53  | -6.25  | Defence and virulence                                                                  |
| 266562_at   | At2g23970 | Defense-Related Protein, Putative                                 | 0.0495 | 0.0485 | 7 | 1.66  | 4.23  | -3.45  | Defence and virulence                                                                  |
| 262156_at   | At1g52680 | Late Embryogenesis Abundant Protein-Related / Lea Protein-Related | 0.0434 | 0.0097 | 7 | 1.17  | 1.40  | -6.81  | Development/storage proteins                                                           |
| 252364_at   | At3g48450 | Nitrate-Responsive Noi Protein, Putative                          | 0.0475 | 0.0373 | 7 | 1.47  | 3.37  | -5.00  | Development/storage proteins                                                           |
| 249687_at   | At5g36150 | Pentacyclic Triterpene Synthase, Putative                         | 0.0481 | 0.0403 | 7 | -1.23 | 2.00  | -9.09  | Primary /secondary metabolism                                                          |
| 257143_at   | At3g20110 | Cytochrome P450 Family Protein                                    | 0.0441 | 0.0120 | 7 | 1.34  | 4.49  | -5.00  | Primary /secondary metabolism                                                          |
| 248704_at   | At5g48450 | Multi-Copper Oxidase Type I Family Protein                        | 0.0487 | 0.0433 | 7 | -2.04 | -1.03 | -5.00  | Primary /secondary metabolism                                                          |
| 247005_at   | At5g67520 | Adenylylsulfate kinase, putative                                  | 0.0474 | 0.0300 | 7 | 1.93  | 2.67  | -1.45  | Primary /secondary metabolism                                                          |
| 248062_at   | At5g55450 | Protease Inhibitor                                                | 0.0445 | 0.0138 | 7 | -1.24 | 1.00  | -15.26 | Protein fate                                                                           |
| 257051_at   | At3g15270 | Squamosa Promoter-Binding Protein-Like 5; Spl5                    | 0.0448 | 0.0200 | 7 | 1.71  | 1.98  | -5.56  | Proteins with binding function or cofactor requirement                                 |
| 259324_at   | At3g05310 | Gtp-Binding Protein-Related                                       | 0.0475 | 0.0315 | 7 | 2.38  | 2.81  | -4.35  | Proteins with binding function or cofactor requirement                                 |
| 258241_at   | At3g27650 | Lob Domain Protein 25                                             | 0.0468 | 0.0266 | 7 | 1.38  | 2.11  | -2.70  | Proteins with binding function or cofactor requirement                                 |
| 257441_at   | At2g04020 | Gdsl-Motif Lipase/Hydrolase Family Protein                        | 0.0441 | 0.0113 | 7 | 2.36  | 2.96  | -5.39  | Re-assembly of cell wall associated genes                                              |
| 257896_at   | At3g16920 | Glycoside Hydrolase Family 19 Protein                             | 0.0445 | 0.0168 | 7 | 1.20  | 2.06  | -3.78  | Re-assembly of cell wall associated genes                                              |
| 256415_at   | At3g11210 | Gdsl-Motif Lipase/Hydrolase Family Protein                        | 0.0447 | 0.0185 | 7 | 1.03  | 1.05  | -2.63  | Re-assembly of cell wall associated genes                                              |
| 259810_at   | At1g49810 | Na+/H+ Antiporter, Putative                                       | 0.0390 | 0.0013 | 7 | 1.05  | 3.68  | -3.85  | Transporters                                                                           |

|             |           |                                            |        |        |   |       |      |        |                                                   |
|-------------|-----------|--------------------------------------------|--------|--------|---|-------|------|--------|---------------------------------------------------|
| 255156_at   | At4g07780 | Gypsy-Like Retrotransposon Family (Athila) | 0.0441 | 0.0106 | 7 | 1.61  | 2.42 | -18.75 | Transposable elements, viral and plasmid proteins |
| 263508_s_at | At2g07685 | Gypsy-Like Retrotransposon Family (Athila) | 0.0482 | 0.0411 | 7 | 1.58  | 1.80 | -7.14  | Transposable elements, viral and plasmid proteins |
| 254366_s_at | At4g22040 | Retrovirus-related polyprotein             | 0.0465 | 0.0241 | 7 | 2.22  | 4.03 | -1.61  | Transposable elements, viral and plasmid proteins |
| 265746_at   | At2g06630 | Hypothetical Protein                       | 0.0445 | 0.0142 | 7 | 1.19  | 1.22 | -40.97 | Unknown proteins                                  |
| 259870_at   | At1g76780 | Expressed Protein                          | 0.0441 | 0.0106 | 7 | -2.27 | 1.67 | -16.67 | Unknown proteins                                  |
| 251012_at   | At5g02580 | Expressed Protein                          | 0.0441 | 0.0091 | 7 | 1.62  | 5.73 | -11.11 | Unknown proteins                                  |
| 254825_at   | At4g12630 | Unknown Protein                            | 0.0390 | 0.0030 | 7 | 1.95  | 1.64 | -8.62  | Unknown proteins                                  |
| 250945_at   | At5g03400 | Hypothetical Protein                       | 0.0478 | 0.0394 | 7 | 1.99  | 1.66 | -6.76  | Unknown proteins                                  |
| 246795_at   | At5g27020 | Hypothetical Protein                       | 0.0475 | 0.0332 | 7 | 1.66  | 1.41 | -6.61  | Unknown proteins                                  |
| 267479_at   | At2g02690 | Expressed Protein                          | 0.0401 | 0.0044 | 7 | 1.05  | 1.61 | -6.24  | Unknown proteins                                  |
| 254311_at   | At4g22440 | Hypothetical Protein                       | 0.0466 | 0.0256 | 7 | 2.00  | 2.22 | -5.56  | Unknown proteins                                  |
| 263738_at   | At1g60060 | Expressed Protein                          | 0.0441 | 0.0105 | 7 | 1.11  | 1.25 | -5.56  | Unknown proteins                                  |
| 247883_at   | At5g57790 | Expressed Protein                          | 0.0390 | 0.0032 | 7 | 1.82  | 1.88 | -3.73  | Unknown proteins                                  |
| 263498_at   | At2g42610 | Expressed Protein                          | 0.0447 | 0.0184 | 7 | 1.34  | 1.98 | -3.70  | Unknown proteins                                  |
| 248282_at   | At5g52900 | Expressed Protein                          | 0.0475 | 0.0371 | 7 | 1.05  | 1.26 | -3.45  | Unknown proteins                                  |
| 248904_at   | At5g46295 | Expressed Protein                          | 0.0445 | 0.0169 | 7 | 1.53  | 1.94 | -3.08  | Unknown proteins                                  |
| 246711_at   | At5g28190 | Hypothetical Protein                       | 0.0445 | 0.0133 | 7 | 1.72  | 3.41 | -2.61  | Unknown proteins                                  |
| 254295_at   | At4g23080 | Expressed Protein                          | 0.0417 | 0.0053 | 7 | 1.02  | 2.97 | -2.50  | Unknown proteins                                  |
| 253050_at   | At4g37450 | Arabinogalactan-Protein (Agp18)            | 0.0454 | 0.0215 | 7 | 1.49  | 1.40 | -6.12  | Structural proteins                               |

**CLUSTER 8: Majority of the genes repressed at 3 hpt followed by significant induction ( $q$ -value  $\leq 0.05$ ;  $\geq 2.5$ ) at 6 hpt and repression at 12 hpt**

|             |           |                                                          |        |        |   |       |       |       |                                                                                        |
|-------------|-----------|----------------------------------------------------------|--------|--------|---|-------|-------|-------|----------------------------------------------------------------------------------------|
| 249729_at   | At5g24410 | Glucosamine/Galactosamine-6-Phosphate Isomerase-Related  | 0.0445 | 0.0153 | 8 | -5.24 | 2.42  | -5.96 | Carbohydrate/soluble sugar/startch/aminoacid metabolism                                |
| 247159_at   | At5g65800 | 1-Aminocyclopropane-1-Carboxylate Synthase, Putative     | 0.0445 | 0.0142 | 8 | -2.91 | 2.38  | -4.04 | Carbohydrate/soluble sugar/startch/aminoacid metabolism                                |
| 260699_at   | At1g32320 | MAP kinase, putative                                     | 0.0475 | 0.0345 | 8 | -2.22 | 3.59  | -1.05 | Cellular communication/Signal transduction mechanism/transmembrane signal transduction |
| 264719_at   | At1g70110 | Lectin protein kinase family protein                     | 0.0466 | 0.0251 | 8 | -1.30 | 4.62  | -1.75 | Cellular communication/Signal transduction mechanism/transmembrane signal transduction |
| 257261_s_at | At3g21930 | Receptor-Like Protein Kinase-Related                     | 0.0454 | 0.0214 | 8 | -1.67 | 4.12  | -3.03 | Cellular communication/Signal transduction mechanism/transmembrane signal transduction |
| 249440_at   | At5g40030 | Protein kinase PK1- like                                 | 0.0441 | 0.0104 | 8 | -1.37 | 6.90  | -2.22 | Cellular communication/Signal transduction mechanism/transmembrane signal transduction |
| 265682_at   | At2g24390 | Avirulence induced gene (AIG) protein, related           | 0.0424 | 0.0072 | 8 | -1.92 | 9.78  | 1.19  | Defence and virulence                                                                  |
| 254582_at   | At4g19470 | Disease resistance protein, related                      | 0.0475 | 0.0369 | 8 | -1.82 | 5.13  | -2.44 | Defence and virulence                                                                  |
| 262752_at   | At1g16330 | Cyclin family protein                                    | 0.0441 | 0.0119 | 8 | -1.59 | 4.33  | -1.41 | Development/storage proteins                                                           |
| 258082_at   | At3g25905 | Cle27, Putative                                          | 0.0450 | 0.0322 | 8 | -4.10 | 3.22  | -4.82 | Development/storage proteins                                                           |
| 248636_at   | At5g49080 | Extensin-like family protein                             | 0.0390 | 0.0025 | 8 | -1.09 | 4.64  | -2.08 | Development/storage proteins                                                           |
| 248112_at   | At5g55350 | Wax Synthase-Like Protein                                | 0.0441 | 0.0111 | 8 | -1.96 | 7.13  | -3.85 | Development/storage proteins                                                           |
| 259388_at   | At1g13420 | Sulfotransferase Family Protein                          | 0.0494 | 0.0474 | 8 | -4.42 | 3.70  | -3.30 | Primary /secondary metabolism                                                          |
| 261529_at   | At1g14430 | glyoxal oxidase-related                                  | 0.0434 | 0.0089 | 8 | -1.52 | 10.14 | 1.50  | Primary /secondary metabolism                                                          |
| 245650_at   | At1g24735 | Caffeoyl-CoA 3-O-methyltransferase, putative             | 0.0475 | 0.0321 | 8 | -1.18 | 2.65  | -1.54 | Primary /secondary metabolism                                                          |
| 256211_at   | At1g50960 | Gibberellin 20-oxidase-related                           | 0.0494 | 0.0469 | 8 | -1.28 | 8.86  | -1.43 | Primary /secondary metabolism                                                          |
| 266308_at   | At2g27010 | Cytochrome P450 family protein                           | 0.0475 | 0.0378 | 8 | -1.16 | 12.86 | -1.18 | Primary /secondary metabolism                                                          |
| 267416_at   | At2g34980 | Phosphatidylinositol-glycan synthase, putative           | 0.0441 | 0.0124 | 8 | -1.14 | 5.72  | -1.75 | Primary /secondary metabolism                                                          |
| 254513_at   | At4g20240 | Cytochrome P450, Putative (Metabolism)                   | 0.0488 | 0.0443 | 8 | -1.72 | 2.73  | -2.70 | Primary /secondary metabolism                                                          |
| 249773_at   | At5g24140 | Squalene monooxygenase 2, SM 2                           | 0.0434 | 0.0096 | 8 | -1.43 | 9.58  | 1.80  | Primary /secondary metabolism                                                          |
| 246970_at   | At5g24900 | Cytochrome P450 Family Protein                           | 0.0407 | 0.0056 | 8 | -2.78 | 7.01  | -1.22 | Primary /secondary metabolism                                                          |
| 248104_at   | At5g55250 | S-adenosyl-L-methionine, putative                        | 0.0465 | 0.0243 | 8 | -1.43 | 3.57  | -1.27 | Primary /secondary metabolism                                                          |
| 267056_at   | At2g32470 | F-box family protein, related                            | 0.0407 | 0.0056 | 8 | 1.06  | 8.98  | 1.34  | Protein fate                                                                           |
| 256120_at   | At1g18130 | TRNA Synthetase-Related -Related                         | 0.0475 | 0.0252 | 8 | -2.72 | 8.78  | -2.99 | RNA metabolism                                                                         |
| 259814_at   | At1g49900 | Zinc finger family protein, C2H2 type                    | 0.0445 | 0.0180 | 8 | -1.09 | 5.58  | -2.44 | Transcription/splicing/RNA processing                                                  |
| 265124_at   | At1g55430 | Zinc finger protein-like CHP type, putative              | 0.0448 | 0.0200 | 8 | -1.82 | 6.99  | -1.37 | Transcription/splicing/RNA processing                                                  |
| 257414_at   | At1g62110 | Mitochondrial transcription factor mTERF family protein  | 0.0475 | 0.0380 | 8 | -2.33 | 4.56  | -1.56 | Transcription/splicing/RNA processing                                                  |
| 263797_at   | At2g24570 | WRKY family transcription factor                         | 0.0390 | 0.0029 | 8 | 1.19  | 3.62  | 1.08  | Transcription/splicing/RNA processing                                                  |
| 246531_at   | At5g15800 | MADS box protein, AGL2                                   | 0.0448 | 0.0193 | 8 | -1.39 | 6.00  | -1.82 | Transcription/splicing/RNA processing                                                  |
| 249884_at   | At5g22910 | Na <sup>+</sup> /H <sup>+</sup> Antipporter-Like Protein | 0.0475 | 0.0316 | 8 | -3.81 | 3.65  | -3.64 | Transporters                                                                           |
| 263746_at   | At2g21460 | Copia-Like Retrotransposon Family                        | 0.0448 | 0.0198 | 8 | -2.95 | 8.04  | -2.09 | Transposable elements, viral and plasmid proteins                                      |
| 266586_s_at | At4g08060 | Cacta-Like Transposase Family (Tnp1/En/Spm)              | 0.0388 | 0.0005 | 8 | -5.00 | 8.51  | -2.22 | Transposable elements, viral and plasmid proteins                                      |
| 259489_at   | At1g15790 | Expressed protein                                        | 0.0453 | 0.0201 | 8 | -1.61 | 2.89  | -1.39 | Unknown proteins                                                                       |
| 245646_s_at | At1g25025 | Expressed Protein                                        | 0.0409 | 0.0176 | 8 | -5.26 | 7.78  | -1.59 | Unknown proteins                                                                       |
| 263672_at   | At2g04820 | Unknown Protein                                          | 0.0405 | 0.0048 | 8 | -3.70 | 8.74  | -2.17 | Unknown proteins                                                                       |
| 263337_at   | At2g04990 | Unknown Protein                                          | 0.0471 | 0.0339 | 8 | -2.91 | 2.80  | -3.24 | Unknown proteins                                                                       |

|           |           |                   |        |        |   |       |      |       |                  |
|-----------|-----------|-------------------|--------|--------|---|-------|------|-------|------------------|
| 265524_at | At2g06180 | Unknown protein   | 0.0409 | 0.0178 | 8 | -2.38 | 5.94 | -1.27 | Unknown proteins |
| 266894_at | At2g26050 | Expressed Protein | 0.0466 | 0.0330 | 8 | -2.93 | 4.17 | -4.14 | Unknown proteins |
| 256592_at | At3g31915 | Expressed Protein | 0.0466 | 0.0327 | 8 | -2.14 | 6.84 | -4.57 | Unknown proteins |
| 255167_at | At4g07920 | Unknown Protein   | 0.0457 | 0.0212 | 8 | -1.51 | 6.74 | -3.40 | Unknown proteins |
| 248430_at | At5g51800 | Expressed protein | 0.0477 | 0.0491 | 8 | -1.82 | 6.76 | -1.72 | Unknown proteins |

**CLUSTER 9: Majority of the genes significantly induced ( $q$  -value  $\leq 0.05$ ;  $\geq 2.5$ ) at 3 hpt followed by induction or repression at 6 hpt and significant repression ( $q$ -value  $\leq 0.05$ ;  $\leq 2.5$ ) at 12 hpt**

|             |           |                                                            |        |        |   |      |       |        |                                                                                        |
|-------------|-----------|------------------------------------------------------------|--------|--------|---|------|-------|--------|----------------------------------------------------------------------------------------|
| 260161_at   | At1g79860 | Kinase Partner Protein-Like                                | 0.0474 | 0.0219 | 9 | 4.92 | 2.32  | -4.17  | Cellular communication/Signal transduction mechanism/transmembrane signal transduction |
| 248420_at   | At5g51560 | Leucine-Rich Repeat Transmembrane Protein Kinase, Putative | 0.0466 | 0.0254 | 9 | 1.86 | 1.00  | -2.70  | Cellular communication/Signal transduction mechanism/transmembrane signal transduction |
| 256487_at   | At1g31540 | Disease resistance protein, TIR-NBS-LRR class, putative    | 0.0475 | 0.0314 | 9 | 2.97 | 1.37  | -1.96  | Defence and virulence                                                                  |
| 253353_at   | At4g33730 | Pathogenesis-Related Protein, Putative                     | 0.0475 | 0.0376 | 9 | 1.45 | -2.33 | -7.69  | Defence and virulence                                                                  |
| 260346_at   | At1g69320 | Cle10, Putative                                            | 0.0494 | 0.0439 | 9 | 2.85 | 1.33  | -2.63  | Development/storage proteins                                                           |
| 267493_at   | At2g30400 | Ovate Family Protein                                       | 0.0479 | 0.0399 | 9 | 1.08 | -1.56 | -9.09  | Development/storage proteins                                                           |
| 248676_at   | At5g48850 | male sterility MS5 family protein                          | 0.0475 | 0.0258 | 9 | 2.59 | 2.26  | -1.45  | Development/storage proteins                                                           |
| 245465_at   | At4g16590 | Glucosyltransferase, related                               | 0.0445 | 0.0181 | 9 | 3.15 | 2.23  | -1.37  | Matrix polymers                                                                        |
| 250783_at   | At5g05260 | Cytochrome P450 (Metabolism)                               | 0.0407 | 0.0055 | 9 | 3.17 | 1.03  | -2.55  | Primary /secondary metabolism                                                          |
| 246009_at   | At5g08335 | Isopenylcysteine carboxyl methyltransferase family protein | 0.0475 | 0.0380 | 9 | 2.80 | 1.59  | -1.59  | Primary /secondary metabolism                                                          |
| 267589_at   | At2g42050 | Peptides precursor                                         | 0.0441 | 0.0120 | 9 | 3.11 | 1.82  | -2.00  | Proteins with binding function or cofactor requirement                                 |
| 255321_at   | At4g04260 | BAH domain containing protein                              | 0.0475 | 0.0350 | 9 | 3.62 | 2.34  | -1.11  | Proteins with binding function or cofactor requirement                                 |
| 264898_at   | At1g23205 | Invertase/Pectin Methylsterase Inhibitor Family Protein    | 0.0441 | 0.0122 | 9 | 2.86 | 1.83  | -2.86  | Re-assembly of cell wall associated genes                                              |
| 258147_at   | At3g18070 | Glycosyl Hydrolase Family 1 Protein                        | 0.0438 | 0.0127 | 9 | 3.06 | 1.25  | -9.70  | Re-assembly of cell wall associated genes                                              |
| 267167_at   | At2g37740 | Zinc Finger (C2H2 Type) Family Protein                     | 0.0474 | 0.0302 | 9 | 2.79 | 1.54  | -7.25  | Transcription/splicing/RNA processing                                                  |
| 252128_at   | At3g50870 | Zinc finger family protein, GATA type                      | 0.0434 | 0.0094 | 9 | 3.00 | 2.04  | -1.54  | Transcription/splicing/RNA processing                                                  |
| 246338_s_at | At3g44930 | Cation/Hydrogen Exchanger, Putative (Chx10)                | 0.0466 | 0.0253 | 9 | 4.13 | 2.42  | -3.45  | Transporters                                                                           |
| 255316_at   | At4g04170 | Cacta-Like Transposase Family (PttA/En/Spm)                | 0.0390 | 0.0015 | 9 | 1.95 | -1.47 | -14.29 | Transposable elements, viral and plasmid proteins                                      |
| 255215_at   | At4g07660 | Gypsy-Like Retrotransposon Family (Athila)                 | 0.0474 | 0.0311 | 9 | 1.35 | -2.22 | -9.09  | Transposable elements, viral and plasmid proteins                                      |
| 266733_at   | At2g03280 | Expressed Protein                                          | 0.0390 | 0.0032 | 9 | 2.25 | 1.31  | -2.70  | Unknown proteins                                                                       |
| 258955_s_at | At3g01450 | Expressed Protein                                          | 0.0480 | 0.0302 | 9 | 4.48 | 1.86  | -6.67  | Unknown proteins                                                                       |
| 255398_at   | At4g03740 | Expressed Protein                                          | 0.0493 | 0.0413 | 9 | 4.90 | 1.53  | -5.96  | Unknown proteins                                                                       |
| 254949_at   | At4g11020 | Expressed Protein                                          | 0.0441 | 0.0126 | 9 | 5.47 | 2.22  | -4.00  | Unknown proteins                                                                       |
| 264461_s_at | At4g15050 | Expressed Protein                                          | 0.0466 | 0.0261 | 9 | 2.49 | 1.38  | -9.09  | Unknown proteins                                                                       |
| 253827_at   | At4g28085 | Expressed protein                                          | 0.0441 | 0.0122 | 9 | 2.77 | 1.22  | -1.05  | Unknown proteins                                                                       |
| 249099_at   | At5g43550 | Expressed Protein                                          | 0.0493 | 0.0456 | 9 | 5.14 | 1.99  | -3.17  | Unknown proteins                                                                       |
| 247646_at   | At5g59990 | Expressed Protein                                          | 0.0475 | 0.0354 | 9 | 2.97 | 1.19  | -3.03  | Unknown proteins                                                                       |

**CLUSTER 10: Majority of the genes significantly induced ( $q$  -value  $\leq 0.05$ ;  $\geq 2.5$ ) at 3 hpt followed by repression at 6 hpt and significant repression ( $q$ -value  $\leq 0.05$ ;  $\leq 2.5$ ) at 12 hpt**

|             |           |                                                     |        |        |    |       |       |        |                                                                                        |
|-------------|-----------|-----------------------------------------------------|--------|--------|----|-------|-------|--------|----------------------------------------------------------------------------------------|
| 245942_at   | At5g19490 | Repressor Protein-Related                           | 0.0493 | 0.0464 | 10 | 2.26  | -1.01 | -4.80  | Cell Cycle/ DNA processing/chromatin regulation and cytoskeleton reorganization        |
| 245655_at   | At1g56530 | Hydroxyproline-Rich Glycoprotein Family Protein     | 0.0434 | 0.0091 | 10 | 7.94  | -2.50 | -6.67  | Cellular communication/Signal transduction mechanism/transmembrane signal transduction |
| 264369_at   | At1g70430 | Ste-20 Kinase Spak, Putative                        | 0.0495 | 0.0485 | 10 | 4.37  | -1.92 | -5.88  | Cellular communication/Signal transduction mechanism/transmembrane signal transduction |
| 247962_at   | At5g56580 | Mitogen-Activated Protein Kinase Kinase, Putative   | 0.0471 | 0.0277 | 10 | 2.78  | -1.27 | -3.45  | Cellular communication/Signal transduction mechanism/transmembrane signal transduction |
| 267041_at   | At2g34315 | Disease Resistance Protein-Related                  | 0.0445 | 0.0159 | 10 | 1.27  | -1.32 | -4.17  | Defence and virulence                                                                  |
| 266286_at   | At2g29170 | Dehydrogenase/Reductase (Sdr) Family Protein        | 0.0445 | 0.0180 | 10 | 1.57  | -1.37 | -4.00  | Primary /secondary metabolism                                                          |
| 266875_at   | At2g44800 | Oxidoreductase, 2Og-Fe(Ii) Oxygenase Family Protein | 0.0445 | 0.0172 | 10 | 3.93  | -1.10 | -5.30  | Primary /secondary metabolism                                                          |
| 260891_at   | At1g29080 | Cysteine Protease, Spcp1                            | 0.0475 | 0.0348 | 10 | 10.06 | 2.38  | -5.00  | Protein fate                                                                           |
| 258741_at   | At3g05790 | Lon protease, putative                              | 0.0485 | 0.0426 | 10 | 3.67  | 1.03  | -2.17  | Protein fate                                                                           |
| 258407_at   | At3g17620 | F-Box Family Protein                                | 0.0475 | 0.0335 | 10 | 1.72  | -1.33 | -3.23  | Protein fate                                                                           |
| 254875_at   | At4g11590 | F-Box Family Protein                                | 0.0448 | 0.0191 | 10 | 2.43  | -4.95 | -10.60 | Protein fate                                                                           |
| 266712_at   | At2g46750 | Fad-Binding Domain-Containing Protein               | 0.0414 | 0.0065 | 10 | 2.36  | -1.21 | -4.66  | Proteins with binding function or cofactor requirement                                 |
| 266877_at   | At2g44570 | Glycosyl hydrolase family 9 protein                 | 0.0397 | 0.0037 | 10 | 5.21  | 1.79  | -1.52  | Re-assembly of cell wall associated genes                                              |
| 254959_at   | At4g10955 | Lipase Class 3 Family Protein                       | 0.0445 | 0.0137 | 10 | 4.74  | -2.08 | -5.56  | Re-assembly of cell wall associated genes                                              |
| 248275_at   | At5g53520 | Oligopeptide transporter OPT family protein         | 0.0488 | 0.0444 | 10 | 3.63  | 1.36  | -1.11  | Transporters                                                                           |
| 256175_at   | At1g51670 | Expressed Protein                                   | 0.0475 | 0.0374 | 10 | 10.29 | 1.53  | -3.13  | Unknown proteins                                                                       |
| 262072_at   | At1g59590 | Expressed protein                                   | 0.0445 | 0.0146 | 10 | 3.43  | 1.33  | -1.22  | Unknown proteins                                                                       |
| 260198_at   | At1g67635 | Expressed Protein                                   | 0.0496 | 0.0493 | 10 | 2.02  | -2.78 | -5.66  | Unknown proteins                                                                       |
| 267491_at   | At2g19140 | Unknown Protein                                     | 0.0488 | 0.0312 | 10 | 3.27  | -1.39 | -3.33  | Unknown proteins                                                                       |
| 255029_x_at | At4g09470 | Expressed Protein                                   | 0.0465 | 0.0243 | 10 | 1.43  | -1.60 | -3.65  | Unknown proteins                                                                       |

**CLUSTER 11: Majority of the genes repressed at 3 and 6 hpt followed by significant induction ( $q$ -value  $\leq 0.05$ ;  $\geq 2.5$ ) at 12 hpt**

|             |           |                                                              |        |        |    |       |       |       |                                                                                        |
|-------------|-----------|--------------------------------------------------------------|--------|--------|----|-------|-------|-------|----------------------------------------------------------------------------------------|
| 263751_at   | At2g21300 | Kinesin Motor Family Protein                                 | 0.0390 | 0.0031 | 11 | -1.20 | -2.94 | 5.21  | Cell Cycle/ DNA processing/chromatin regulation and cytoskeleton reorganization        |
| 256587_at   | At3g28780 | Histone H4 protein-like                                      | 0.0466 | 0.0257 | 11 | -1.35 | -1.61 | 2.52  | Cell Cycle/ DNA processing/chromatin regulation and cytoskeleton reorganization        |
| 264991_s_at | At3g43400 | Phagocytosis and cell motility protein ELMO1, related        | 0.0441 | 0.0132 | 11 | -1.09 | 1.00  | 5.99  | Cell Cycle/ DNA processing/chromatin regulation and cytoskeleton reorganization        |
| 261308_at   | At1g48480 | Leucine-Rich Repeat Transmembrane Protein Kinase, Putative   | 0.0448 | 0.0200 | 11 | -2.50 | -2.70 | 1.51  | Cellular communication/Signal transduction mechanism/transmembrane signal transduction |
| 257825_at   | At3g26700 | Protein kinase, putative                                     | 0.0424 | 0.0072 | 11 | -1.45 | -1.19 | 3.19  | Cellular communication/Signal transduction mechanism/transmembrane signal transduction |
| 261703_at   | At1g32770 | No Apical Meristem (Nam) Family Protein                      | 0.0476 | 0.0387 | 11 | -3.23 | -1.11 | 1.97  | Development/storage proteins                                                           |
| 267198_at   | At2g30810 | Gibberellin-regulated family protein                         | 0.0467 | 0.0264 | 11 | -1.22 | 1.10  | 26.53 | Development/storage proteins                                                           |
| 251119_at   | At3g63510 | Nitrogen regulation family protein                           | 0.0499 | 0.0499 | 11 | -1.19 | -2.27 | 4.16  | Development/storage proteins                                                           |
| 249702_at   | At5g35570 | Auxin-independent growth promoter protein, Axi 1             | 0.0489 | 0.0445 | 11 | -1.52 | -1.67 | 2.72  | Development/storage proteins                                                           |
| 250138_at   | At5g14610 | DEAD box RNA helicase, putative                              | 0.0492 | 0.0453 | 11 | -1.15 | -1.75 | 3.10  | Helicase activity                                                                      |
| 260475_at   | At1g11080 | Serine carboxypeptidase S10 family protein                   | 0.0398 | 0.0040 | 11 | -1.22 | -1.30 | 6.75  | Primary /secondary metabolism                                                          |
| 259696_at   | At1g63150 | Pentatricopeptide (Ppr) Repeat-Containing Protein            | 0.0445 | 0.0136 | 11 | -3.85 | -1.82 | 5.55  | Primary /secondary metabolism                                                          |
| 263068_at   | At2g17580 | Polynucleotide Adenylyltransferase Family Protein            | 0.0447 | 0.0183 | 11 | -3.03 | -1.61 | 3.68  | Primary /secondary metabolism                                                          |
| 267434_at   | At2g26260 | 3-Beta Hydroxysteroid Dehydrogenase/Isomerase Family Protein | 0.0465 | 0.0248 | 11 | -3.38 | -4.96 | 1.45  | Primary /secondary metabolism                                                          |
| 258962_at   | At3g10570 | Cytochrome P450, putative                                    | 0.0401 | 0.0044 | 11 | -1.20 | -1.01 | 6.66  | Primary /secondary metabolism                                                          |
| 258174_at   | At3g21470 | Pentatricopeptide (PPR) repeat-containing protein            | 0.0494 | 0.0428 | 11 | -1.52 | -1.75 | 3.58  | Primary /secondary metabolism                                                          |
| 248692_s_at | At4g15070 | DC1 domain containing protein                                | 0.0466 | 0.0258 | 11 | -2.38 | -1.04 | 9.94  | Proteins with binding function or cofactor requirement                                 |
| 252756_s_at | At3g43550 | Gdsl-Motif Lipase, Putative                                  | 0.0405 | 0.0050 | 11 | -1.06 | -4.17 | 14.58 | Re-assembly of cell wall associated genes                                              |
| 251748_at   | At3g55680 | Invertase/Pectin Methyltransferase Inhibitor Family Protein  | 0.0475 | 0.0320 | 11 | -5.85 | -2.19 | 3.96  | Re-assembly of cell wall associated genes                                              |
| 253226_at   | At4g35010 | Glycosyl Hydrolase Family 35 Protein                         | 0.0465 | 0.0237 | 11 | -3.12 | -2.75 | 1.10  | Re-assembly of cell wall associated genes                                              |
| 245849_at   | At5g13520 | Hydrolase-Like Protein                                       | 0.0475 | 0.0376 | 11 | -1.56 | -3.13 | 4.35  | Re-assembly of cell wall associated genes                                              |
| 259595_at   | At1g28050 | Zinc finger B-box type family protein                        | 0.0492 | 0.0455 | 11 | -1.02 | -2.08 | 3.83  | Transcription/splicing/RNA processing                                                  |
| 246274_at   | At4g36620 | Zinc Finger (Gata Type) Family Protein                       | 0.0475 | 0.0372 | 11 | -3.81 | -5.85 | 2.10  | Transcription/splicing/RNA processing                                                  |
| 245179_at   | At5g12400 | PHD finger transcription factor, putative                    | 0.0465 | 0.0238 | 11 | -1.14 | -1.69 | 3.60  | Transcription/splicing/RNA processing                                                  |
| 250051_at   | At5g17800 | MYB family transcription factor, MYB56                       | 0.0424 | 0.0071 | 11 | -1.04 | -2.04 | 2.97  | Transcription/splicing/RNA processing                                                  |
| 248596_at   | At5g49330 | MYB family transcription factor                              | 0.0401 | 0.0043 | 11 | -1.43 | -1.92 | 6.03  | Transcription/splicing/RNA processing                                                  |
| 261455_at   | At1g21070 | Transporter-related                                          | 0.0449 | 0.0203 | 11 | -2.00 | -2.00 | 4.04  | Transporters                                                                           |
| 262031_x_at | At1g37160 | Gypsy-Like Retrotransposon Family (Athila)                   | 0.0475 | 0.0351 | 11 | -2.38 | -3.85 | 1.70  | Transposable elements, viral and plasmid proteins                                      |
| 264932_at   | At1g61240 | Expressed protein                                            | 0.0475 | 0.0268 | 11 | -1.54 | -1.41 | 4.04  | Unknown proteins                                                                       |
| 255853_at   | At1g67020 | Hypothetical Protein                                         | 0.0477 | 0.0477 | 11 | -1.89 | -3.03 | 7.37  | Unknown proteins                                                                       |
| 263815_at   | At2g10020 | Expressed protein                                            | 0.0457 | 0.0208 | 11 | -1.14 | -1.79 | 2.93  | Unknown proteins                                                                       |
| 265491_s_at | At2g15650 | Unknown protein                                              | 0.0407 | 0.0052 | 11 | -2.27 | -1.67 | 4.05  | Unknown proteins                                                                       |
| 259195_at   | At3g01730 | Expressed protein                                            | 0.0446 | 0.0185 | 11 | -2.22 | 1.62  | 9.32  | Unknown proteins                                                                       |
| 257308_at   | At3g28120 | Expressed Protein                                            | 0.0482 | 0.0380 | 11 | -3.49 | -2.60 | 6.37  | Unknown proteins                                                                       |
| 252778_at   | At3g42980 | Hypothetical protein                                         | 0.0474 | 0.0300 | 11 | -1.69 | -2.44 | 5.10  | Unknown proteins                                                                       |
| 246341_x_at | At3g43150 | Hypothetical Protein                                         | 0.0474 | 0.0292 | 11 | -2.13 | -3.45 | 1.74  | Unknown proteins                                                                       |
| 252196_at   | At3g50200 | Expressed Protein                                            | 0.0494 | 0.0474 | 11 | -3.68 | -1.67 | 2.00  | Unknown proteins                                                                       |
| 248706_at   | At5g48530 | Expressed Protein                                            | 0.0476 | 0.0388 | 11 | -3.24 | -2.88 | 3.99  | Unknown proteins                                                                       |

<sup>a</sup>Probe set ID represents Affymetrix probe set number.

<sup>b</sup>AGI represents *Arabidopsis* Genome Initiative (AGI) locus identifier corresponding to each gene represented on the array.

<sup>c</sup> $q$ -value  $\leq 0.05$  (5% False discovery rate) was used to determine genes differentially expressed in protoplasts transfected with an PPV infectious clone, pPPV-SK68 relative to its non-infectious mutant, pPPV-SK68Δ.

<sup>d</sup> $p$ -values ( $p \leq 0.05$ ) from the ANOVA were used to calculate  $q$ -value after adjusting the values using Benjamini and Hochberg [21] multiple testing correction.

<sup>e</sup>Hierarchical clustering and changes in gene expression of 411 significantly ( $q$ -value  $\leq 0.05$ ) differentially expressed *Arabidopsis* genes at 3, 6 and 12 hours post transfection (hpt).

<sup>f</sup>Calculation of fold changes was defined in Methods.

<sup>g</sup>hpt, hours post transfection.

<sup>h</sup>Determined following the method of the *Arabidopsis* MIPS (Munich Information Centre for Protein Sequences) functional classification scheme.
