# Supplementary material for: Altered gene expression changes in Arabidopsis leaf tissues and protoplasts in response to Plum pox virus infection
Source: PubMed Central journal article supplement (PMC2478689; doi:10.1186/1471-2164-9-325), 2008-07-09
Supplement: 1471-2164-9-325-S9.pdf [file 1471-2164-9-325-S9.pdf]

**Supplemental Table 7.** Identification of *Prunus persica* orthologs to *Arabidopsis* genes differentially regulated by PPV infection in the leaf tissues at 17 days post inoculation.

| AGI* Locus                                                                                                                                              | ATH1* gene annotation                           | Functional groups*                                                                     | Annotation of Peach Orthologs <sup>d</sup> | PPL* EST identifier         | HSP <sup>e</sup> | E-value  | Identity <sup>d</sup> | GenBank Identifier <sup>h</sup> |
|---------------------------------------------------------------------------------------------------------------------------------------------------------|-------------------------------------------------|----------------------------------------------------------------------------------------|--------------------------------------------|-----------------------------|------------------|----------|-----------------------|---------------------------------|
| <b>I. Arabidopsis gene sequences significantly induced by PPV in the infected leaf tissues show sequence similarity to <i>Prunus persica</i> unESTs</b> |                                                 |                                                                                        |                                            |                             |                  |          |                       |                                 |
| <b>A. Defence and virulence</b>                                                                                                                         |                                                 |                                                                                        |                                            |                             |                  |          |                       |                                 |
| AT2G14580                                                                                                                                               | Pathogenesis-Related Protein                    | Defence and virulence                                                                  | Unknown Protein                            | PPL-01-E1E1E2               | 108              | 5.00E-48 | 68                    | DN552939                        |
|                                                                                                                                                         |                                                 |                                                                                        | Unknown Protein                            | PPL-22-H11                  | 129              | 7.00E-58 | 66                    | DN556049                        |
|                                                                                                                                                         |                                                 |                                                                                        | Tubulin Alpha-2/Alpha-4 Chain              | PPL-19-E07                  | 158              | 1.00E-57 | 65                    | DN555644                        |
|                                                                                                                                                         |                                                 |                                                                                        | Unknown Protein                            | PPL-16-F04                  | 114              | 1.00E-52 | 70                    | DN556381                        |
|                                                                                                                                                         |                                                 |                                                                                        | Unknown Protein                            | PPL-12-F08                  | 161              | 3.00E-67 | 68                    | DN554655                        |
|                                                                                                                                                         |                                                 |                                                                                        | Unknown Protein                            | PPL-14-C07                  | 158              | 2.00E-66 | 65                    | DN554801                        |
|                                                                                                                                                         |                                                 |                                                                                        | Water Channel - Like Protein               | PPL-11-G06                  | 158              | 1.00E-57 | 65                    | DN554576                        |
|                                                                                                                                                         |                                                 |                                                                                        | Pathogenesis-Related Protein 1             | PPL-05-D08                  | 103              | 2.00E-23 | 70                    | DN553262                        |
|                                                                                                                                                         |                                                 |                                                                                        | Unknown Protein                            | PPL-08-_T3_F05              | 132              | 2.00E-60 | 67                    | DN554179                        |
|                                                                                                                                                         |                                                 |                                                                                        | Flavonoid 3'-Hydroxylase - Like Protein    | PPL-06-C03                  | 108              | 4.00E-32 | 68                    | DN553869                        |
| AT5G63530                                                                                                                                               | Copper Chaperone (Ccb)-Related                  | Defence and virulence                                                                  | Unknown Protein                            | PPL-08-_T3_C10              | 135              | 6.00E-33 | 46                    | DN554149                        |
| AT5G13000                                                                                                                                               | Glycosyl Transferase Family 48 Protein          | Defence and virulence                                                                  | Unknown Protein                            | PPL-08-_T3_D12 ; PPL-17-A08 | 123              | 2.00E-29 | 98                    | DN554162; DN555510              |
| AT2G31960                                                                                                                                               | Glycosyl Transferase Family 48 Protein          | Defence and virulence                                                                  | Unknown Protein                            | PPL-08-_T3_D12 ; PPL-17-A08 | 122              | 2.00E-29 | 98                    | DN554162; DN555510              |
| AT4G35090                                                                                                                                               | Catalase 2                                      | Defence and virulence                                                                  | Unknown Protein                            | PPL-09-D02                  | 403              | E-113    | 87                    | DN554240                        |
|                                                                                                                                                         |                                                 |                                                                                        | Unknown Protein                            | PPL-19-G10                  | 126              | 2.00E-30 | 87                    | DN555670                        |
|                                                                                                                                                         |                                                 |                                                                                        | Pectinesterase Like Protein                | PPL-18-G11                  | 369              | E-103    | 88                    | DN555854                        |
|                                                                                                                                                         |                                                 |                                                                                        | Unknown Protein                            | PPL-14-F10 ; PPL-15-D10     | 366              | E-102    | 84; 87                | DN554833; DN554896              |
|                                                                                                                                                         |                                                 |                                                                                        | Unknown Protein                            | PPL-13-E04                  | 404              | E-114    | 86                    | DN554727                        |
| AT1G20630                                                                                                                                               | Catalase 1                                      | Defence and virulence                                                                  | Unknown Protein                            | PPL-09-D02                  | 391              | E-110    | 84                    | DN554240                        |
|                                                                                                                                                         |                                                 |                                                                                        | Unknown Protein                            | PPL-19-G10                  | 115              | 3.00E-27 | 72                    | DN555670                        |
|                                                                                                                                                         |                                                 |                                                                                        | Pectinesterase Like Protein                | PPL-18-G11                  | 357              | E-100    | 86                    | DN555854                        |
|                                                                                                                                                         |                                                 |                                                                                        | Unknown Protein                            | PPL-14-F10                  | 349              | 2.00E-97 | 79                    | DN554833                        |
|                                                                                                                                                         |                                                 |                                                                                        | Unknown Protein                            | PPL-15-D10                  | 351              | 6.00E-98 | 83                    | DN554896                        |
|                                                                                                                                                         |                                                 |                                                                                        | Unknown Protein                            | PPL-13-E04                  | 384              | E-108    | 83                    | DN554727                        |
| AT5G39190                                                                                                                                               | Germin-Like Protein (Ger2)                      | Defence and virulence                                                                  | Unknown Protein                            | PPL-09-E12                  | 104              | 1.00E-23 | 47                    | DN554260                        |
| AT1G75800                                                                                                                                               | Pathogenesis-Related Thaumatin Family Protein   | Defence and virulence                                                                  | Unknown Protein                            | PPL-11-E12                  | 101              | 2.00E-25 | 50                    | DN554559                        |
|                                                                                                                                                         |                                                 |                                                                                        | Unknown Protein                            | PPL-23-C03                  | 156              | 7.00E-44 | 58                    | DN556075                        |
|                                                                                                                                                         |                                                 |                                                                                        | S-Adenosylmethionine Synthase 2            | PPL-23-C01                  | 156              | 5.00E-42 | 58                    | DN556073                        |
| AT4G38670                                                                                                                                               | Pathogenesis-Related Thaumatin Family Protein   | Defence and virulence                                                                  | Unknown Protein                            | PPL-11-E12                  | 101              | 7.00E-24 | 49                    | DN554559                        |
| AT5G02500                                                                                                                                               | Heat Shock Cognate 70 Kda Protein               | Defence and virulence                                                                  | Unknown Protein                            | PPL-11-F07                  | 116              | 5.00E-36 | 87                    | DN554565                        |
|                                                                                                                                                         |                                                 |                                                                                        | Pectinesterase Like Protein                | PPL-25-G11                  | 183              | 3.00E-51 | 86                    | DN556311                        |
|                                                                                                                                                         |                                                 |                                                                                        | Unknown Protein                            | PPL-23-B12                  | 125              | 7.00E-39 | 86                    | DN556072                        |
|                                                                                                                                                         |                                                 |                                                                                        | Unknown Protein                            | PPL-19-B05                  | 157              | 1.00E-43 | 85                    | DN555607                        |
|                                                                                                                                                         |                                                 |                                                                                        | Unknown Protein                            | PPL-13-D02                  | 229              | 3.00E-61 | 89                    | DN554713                        |
|                                                                                                                                                         |                                                 |                                                                                        | Unknown Protein                            | PPL-11-F07                  | 105              | 2.00E-32 | 84                    | DN554565                        |
|                                                                                                                                                         |                                                 |                                                                                        | Pectinesterase Like Protein                | PPL-25-G11                  | 182              | 3.00E-47 | 70                    | DN556311                        |
|                                                                                                                                                         |                                                 |                                                                                        | Unknown Protein                            | PPL-23-B12                  | 110              | 5.00E-34 | 84                    | DN556072                        |
|                                                                                                                                                         |                                                 |                                                                                        | Unknown Protein                            | PPL-19-B05                  | 158              | 4.00E-40 | 68                    | DN555607                        |
|                                                                                                                                                         |                                                 |                                                                                        | Unknown Protein                            | PPL-13-D02                  | 229              | 6.00E-65 | 75                    | DN554713                        |
| AT3G12580                                                                                                                                               | Heat Shock Cognate 70 Kda Protein               | Defence and virulence                                                                  | Unknown Protein                            | PPL-11-F07                  | 110              | 2.00E-25 | 68                    | DN554565                        |
|                                                                                                                                                         |                                                 |                                                                                        | Pectinesterase Like Protein                | PPL-25-G11                  | 199              | 2.00E-52 | 83                    | DN556311                        |
|                                                                                                                                                         |                                                 |                                                                                        | Unknown Protein                            | PPL-23-B12                  | 116              | 2.00E-27 | 70                    | DN556072                        |
|                                                                                                                                                         |                                                 |                                                                                        | Unknown Protein                            | PPL-19-B05                  | 175              | 3.00E-45 | 83                    | DN555607                        |
|                                                                                                                                                         |                                                 |                                                                                        | Unknown Protein                            | PPL-13-D02                  | 244              | 7.00E-66 | 85                    | DN554713                        |
|                                                                                                                                                         |                                                 |                                                                                        | Unknown Protein                            | PPL-13-B05 ; PPL-17-E01     | 158              | 2.00E-66 | 65                    | DN554697; DN555547              |
| AT2G14580                                                                                                                                               | Pathogenesis-Related Protein                    | Defence and virulence                                                                  | S-Adenosylmethionine Synthase 2            | PPL-23-C01                  | 108              | 2.00E-45 | 55                    | DN556073                        |
| AT4G38660                                                                                                                                               | Thaumatococcus, Putative                        | Defence and virulence                                                                  | Unknown Protein                            | PPL-14-B12                  | 102              | 5.00E-23 | 47                    | DN554794                        |
| AT3G14650                                                                                                                                               | Cytochrome P450                                 | Defence and virulence                                                                  | Unknown Protein                            | PPL-15-A10                  | 130              | 2.00E-31 | 52                    | DN554865                        |
| AT2G16890                                                                                                                                               | Udp-Glucuronosyl/Udp-Glucosyl Transferase       | Defence and virulence                                                                  | Unknown Protein                            | PPL-16-C09                  | 134              | 4.00E-49 | 65                    | DN556353                        |
| AT2G31790                                                                                                                                               | Udp-Glucuronosyl/Udp-Glucosyl Transferase       | Defence and virulence                                                                  | Unknown Protein                            | PPL-16-C09                  | 112              | 7.00E-35 | 55                    | DN556353                        |
| AT1G05530                                                                                                                                               | Udp-Glucuronosyl/Udp-Glucosyl Transferase       | Defence and virulence                                                                  | Unknown Protein                            | PPL-16-C09                  | 112              | 7.00E-35 | 55                    | DN556353                        |
| AT4G38270                                                                                                                                               | Glycosyl Transferase Family 8 Protein           | Defence and virulence                                                                  | Unknown Protein                            | PPL-23-F12                  | 188              | 7.00E-49 | 64                    | DN556118                        |
| AT3G08910                                                                                                                                               | Dnaj Heat Shock Protein                         | Defence and virulence                                                                  | Unknown Protein                            | PPL-23-H12                  | 142              | 1.00E-45 | 57                    | DN556142                        |
| AT2G20560                                                                                                                                               | Dnaj Heat Shock Protein                         | Defence and virulence                                                                  | Unknown Protein                            | PPL-23-H12                  | 135              | 9.00E-43 | 56                    | DN556142                        |
| AT1G49860                                                                                                                                               | Glutathione S-Transferase                       | Defence and virulence                                                                  | Calcium-Dependent Protein Kinase (Cdkp6)   | PPL-20-A06                  | 140              | 1.00E-34 | 44                    | DN555689                        |
| AT1G78360                                                                                                                                               | Glutathione S-Transferase                       | Defence and virulence                                                                  | Water Channel - Like Protein               | PPL-20-D09                  | 133              | 2.00E-32 | 67                    | DN555725                        |
|                                                                                                                                                         |                                                 |                                                                                        | Chlorophyll A/B-Binding Protein            | PPL-21-B10                  | 138              | 9.00E-34 | 68                    | DN555888                        |
| AT5G18820                                                                                                                                               | Chaperonin, Putative                            | Defence and virulence                                                                  | Nucleoid Dna-Binding-Like Protein          | PPL-24-C09                  | 184              | 4.00E-47 | 68                    | DN556174                        |
| AT3G13470                                                                                                                                               | Chaperonin, Putative                            | Defence and virulence                                                                  | Nucleoid Dna-Binding-Like Protein          | PPL-24-C09                  | 109              | 2.00E-35 | 56                    | DN556174                        |
| AT3G44110                                                                                                                                               | DNA J Heat Shock Protein, Putative              | Defence and virulence                                                                  | Unknown Protein                            | PPL-03-E10                  | 125              | 6.00E-30 | 74                    | DN5553106                       |
| AT2G40280                                                                                                                                               | Dehydration-Responsive Family Protein           | Defence and virulence                                                                  | Unknown Protein                            | PPL-20-H05                  | 100              | 1.00E-39 | 69                    | DN555767                        |
| AT5G62640                                                                                                                                               | Proline-Rich Family Protein                     | Defence and virulence                                                                  | Translatinally Controlled Tumor Protein    | PPL-18-H01                  | 161              | 8.00E-43 | 64                    | DN555856                        |
| <b>B. Cellular communication/Signal transduction mechanism/transmembrane signal transduction</b>                                                        |                                                 |                                                                                        |                                            |                             |                  |          |                       |                                 |
| AT4G00720                                                                                                                                               | Shaggy-Related Protein Kinase                   | Cellular communication/Signal transduction mechanism/transmembrane signal transduction | Unknown Protein                            | PPL-03-F10                  | 262              | 4.00E-71 | 93                    | DN553117                        |
| AT1G09840                                                                                                                                               | Shaggy-Related Protein Kinase                   | Cellular communication/Signal transduction mechanism/transmembrane signal transduction | Unknown Protein                            | PPL-03-F10                  | 252              | 4.00E-68 | 88                    | DN553117                        |
| AT1G07430                                                                                                                                               | Protein Phosphatase 2C, Putative                | Cellular communication/Signal transduction mechanism/transmembrane signal transduction | Unknown Protein                            | PPL-21-B03                  | 185              | 5.00E-48 | 62                    | DN555881                        |
| AT5G10900                                                                                                                                               | Calcineurin-Like Phosphoesterase Family Protein | Cellular communication/Signal transduction mechanism/transmembrane signal transduction | Unknown Protein                            | PPL-06-H02                  | 111              | 1.00E-33 | 67                    | DN553999                        |
| AT3G22800                                                                                                                                               | Leucine-Rich Repeat Family Protein              | Cellular communication/Signal transduction mechanism/transmembrane signal transduction | Unknown Protein                            | PPL-10-E11 ; PPL-15-F08     | 113              | 2.00E-26 | 65                    | DN554465; DN554917              |
| AT5G11850                                                                                                                                               | Protein Kinase Family Protein                   | Cellular communication/Signal transduction mechanism/transmembrane signal transduction | Endoxyllogucan Transferase-Like Protein    | PPL-12-B03                  | 303              | 2.00E-83 | 90                    | DN554604                        |
| AT4G23050                                                                                                                                               |                                                 |                                                                                        | Endoxyllogucan Transferase-Like Protein    | PPL-12-B03                  | 175              | 5.00E-45 | 53                    | DN554604                        |
| AT2G17700                                                                                                                                               |                                                 |                                                                                        | Endoxyllogucan Transferase-Like Protein    | PPL-12-B03                  | 116              | 2.00E-27 | 40                    | DN554604                        |
| AT4G15530                                                                                                                                               | Pyruvate,Orthophosphate Dikinase                | Cellular communication/Signal transduction mechanism/transmembrane signal transduction | Pyruvateorthophosphate Dikinase            | PPL-14-F02                  | 364              | E-102    | 88                    | DN554825                        |
| AT1G49490                                                                                                                                               | Leucine-Rich Repeat Family Protein              | Cellular communication/Signal transduction mechanism/transmembrane signal transduction | Flavanone 3-Hydroxylase (Fh3)              | PPL-17-G04                  | 135              | 6.00E-49 | 52                    | DN555571                        |
| AT3G22800                                                                                                                                               | Leucine-Rich Repeat Family Protein              | Cellular communication/Signal transduction mechanism/transmembrane signal transduction | Flavanone 3-Hydroxylase (Fh3)              | PPL-17-G04                  | 110              | 2.00E-41 | 44                    | DN555571                        |

|                                                                                           |                                                      |                                                                                        |                                             |                           |     |          |    |                    |
|-------------------------------------------------------------------------------------------|------------------------------------------------------|----------------------------------------------------------------------------------------|---------------------------------------------|---------------------------|-----|----------|----|--------------------|
| AT3G13670                                                                                 | Protein Kinase Family Protein                        | Cellular communication/Signal transduction mechanism/transmembrane signal transduction | Unknown Protein                             | PPL-19-F01                | 329 | 2.00E-91 | 84 | DN555650           |
| AT5G51760                                                                                 | Protein Phosphatase 2C, Putative                     | Cellular communication/Signal transduction mechanism/transmembrane signal transduction | Unknown Protein                             | PPL-21-B03                | 181 | 9.00E-47 | 63 | DN555881           |
| <b>C. Cell Cycle/ DNA processing/chromatin regulation and cytoskeleton reorganization</b> |                                                      |                                                                                        |                                             |                           |     |          |    |                    |
| AT5G10470                                                                                 | Kinesin Motor Protein-Related                        | Cell Cycle/ DNA processing/chromatin regulation and cytoskeleton reorganization        | Kinesin-Related Protein                     | PPL-12-B09                | 234 | 6.00E-74 | 74 | DN554610           |
|                                                                                           |                                                      |                                                                                        | Unknown Protein                             | PPL-19-H10                | 217 | 4.00E-57 | 75 | DN555681           |
| AT4G13570                                                                                 | Histone H2A                                          | Cell Cycle/ DNA processing/chromatin regulation and cytoskeleton reorganization        | Unknown Protein                             | PPL04-D03                 | 122 | 6.00E-29 | 89 | DN553174           |
| AT1G04820                                                                                 | Tubulin Alpha-2                                      | Cell Cycle/ DNA processing/chromatin regulation and cytoskeleton reorganization        | Unknown Protein                             | PPL-09-D12                | 393 | E-110    | 96 | DN554249           |
|                                                                                           |                                                      |                                                                                        | Unknown Protein                             | PPL-21-E12                | 162 | 3.00E-41 | 91 | DN555925           |
|                                                                                           |                                                      |                                                                                        | Unknown Protein                             | PPL-09-G12                | 258 | 5.00E-70 | 94 | DN554282           |
| AT5G19770                                                                                 | Tubulin Alpha-3                                      | Cell Cycle/ DNA processing/chromatin regulation and cytoskeleton reorganization        | Unknown Protein                             | PPL-09-D12                | 383 | E-107    | 92 | DN554249           |
|                                                                                           |                                                      |                                                                                        | Unknown Protein                             | PPL-21-E12                | 158 | 4.00E-40 | 85 | DN555925           |
|                                                                                           |                                                      |                                                                                        | Unknown Protein                             | PPL-09-G12                | 254 | 9.00E-69 | 89 | DN554282           |
| <b>D. Development/storage proteins</b>                                                    |                                                      |                                                                                        |                                             |                           |     |          |    |                    |
| AT2G35490                                                                                 | Plastid-Lipid Associated Protein                     | Development/storage proteins                                                           | Pectinesterase Like Protein                 | PPL-18-C01                | 168 | 2.00E-42 | 44 | DN555797           |
| AT4G09610                                                                                 | Gibberellin-Regulated Protein                        | Development/storage proteins                                                           | Water Channel - Like Protein                | PPL-18-F10                | 112 | 2.00E-26 | 54 | DN555842           |
| AT1G59750                                                                                 | Auxin-Responsive Factor (Arf1)                       | Development/storage proteins                                                           | Unknown Protein                             | PPL-13-A04                | 132 | 2.00E-31 | 59 | DN554685           |
| <b>E. Metabolism/energy/membrane associated proteins</b>                                  |                                                      |                                                                                        |                                             |                           |     |          |    |                    |
| AT3G54050                                                                                 | Fructose-1,6-Bisphosphatase                          | Metabolism/energy/membrane associated proteins                                         | Unknown Protein                             | PPL-01-B03B12; PPL-05-A05 | 142 | 2.00E-35 | 85 | DN555080; DN553227 |
|                                                                                           |                                                      |                                                                                        | Retrotransposon Like Protein                | PPL-06-A01                | 138 | 9.00E-34 | 55 | DN553867           |
|                                                                                           |                                                      |                                                                                        | Fructose 16-Bisphosphatase Putative         | PPL-22-C02                | 224 | 1.00E-59 | 59 | DN555986           |
|                                                                                           |                                                      |                                                                                        | Unknown Protein                             | PPL-16-G12                | 134 | 8.00E-53 | 56 | DN556401           |
|                                                                                           |                                                      |                                                                                        | Water Channel - Like Protein                | PPL-12-D01                | 249 | 2.00E-67 | 57 | DN554625           |
|                                                                                           |                                                      |                                                                                        | Unknown Protein                             | PPL-09-F04                | 250 | 2.00E-67 | 56 | DN554263           |
| AT3G54050                                                                                 | Fructose-1,6-Bisphosphatase                          | Metabolism/energy/membrane associated proteins                                         | Unknown Protein                             | PPL-01-D01D10             | 141 | 5.00E-35 | 84 | DN552965           |
| AT3G19000                                                                                 | Oxidoreductase, 2Og-Fc(B) Oxygenase Family Protein   | Metabolism/energy/membrane associated proteins                                         | Air1A-Like Protein                          | PPL-02-B07                | 224 | 7.00E-60 | 67 | DN552997           |
| AT2G39730                                                                                 | Ribulose Bisphosphate Carboxylase/Oxygenase Activase | Metabolism/energy/membrane associated proteins                                         | Unknown Protein                             | PPL-06-D04                | 371 | E-104    | 94 | DN553870           |
|                                                                                           |                                                      |                                                                                        | Pectinesterase Like Protein                 | PPL-25-E07                | 218 | 6.00E-58 | 93 | DN556284           |
|                                                                                           |                                                      |                                                                                        | Unknown Protein                             | PPL-22-D09                | 122 | 4.00E-29 | 74 | DN556005           |
|                                                                                           |                                                      |                                                                                        | Pectinesterase Like Protein                 | PPL-21-A06                | 202 | 4.00E-53 | 79 | DN555872           |
|                                                                                           |                                                      |                                                                                        | Water Channel - Like Protein                | PPL-17-G08                | 203 | 2.00E-53 | 75 | DN555575           |
|                                                                                           |                                                      |                                                                                        | Unknown Protein                             | PPL-16-F09                | 152 | 5.00E-38 | 77 | DN556386           |
|                                                                                           |                                                      |                                                                                        | Unknown Protein                             | PPL-08-_T3_F08            | 361 | E-101    | 85 | DN554182           |
| AT4G13890                                                                                 | Glycine Hydroxymethyltransferase                     | Metabolism/energy/membrane associated proteins                                         | Unknown Protein                             | PPL-06-D05                | 111 | 7.00E-26 | 50 | DN553957           |
|                                                                                           |                                                      |                                                                                        | Water Channel - Like Protein                | PPL-24-C08                | 124 | 1.00E-45 | 53 | DN556173           |
|                                                                                           |                                                      |                                                                                        | Histon H3 Protein                           | PPL-18-E06                | 207 | 2.00E-68 | 68 | DN555826           |
|                                                                                           |                                                      |                                                                                        | Unknown Protein                             | PPL-15-B04                | 221 | 3.00E-58 | 70 | DN554871           |
|                                                                                           |                                                      |                                                                                        | H+-Transporting Atpase - Like Protein       | PPL-14-C11                | 132 | 1.00E-47 | 51 | DN554805           |
|                                                                                           |                                                      |                                                                                        | Unknown Protein                             | PPL-08-_T3_E08            | 150 | 2.00E-37 | 73 | DN554170           |
| AT2G26080                                                                                 | Glycine Dehydrogenase                                | Metabolism/energy/membrane associated proteins                                         | Putative Glycine Dehydrogenase              | PPL-06-D12                | 404 | E-114    | 94 | DN553964           |
|                                                                                           |                                                      |                                                                                        | Unknown Protein                             | PPL-20-G03                | 209 | 3.00E-55 | 94 | DN555754           |
|                                                                                           |                                                      |                                                                                        | Profilin 1                                  | PPL-18-G06                | 351 | 6.00E-98 | 90 | DN555850           |
|                                                                                           |                                                      |                                                                                        | Unknown Protein                             | PPL-24-F04                | 361 | E-101    | 91 | DN556203           |
|                                                                                           |                                                      |                                                                                        | Cinnamoyl-Coa Reductase                     | PPL-16-C11                | 154 | 1.00E-38 | 90 | DN556355           |
|                                                                                           |                                                      |                                                                                        | Pectinesterase Like Protein                 | PPL-17-H12                | 335 | 3.00E-93 | 91 | DN555590           |
|                                                                                           |                                                      |                                                                                        | Unknown Protein                             | PPL-06-G02                | 292 | 4.00E-80 | 92 | DN553988           |
|                                                                                           |                                                      |                                                                                        | Unknown Protein                             | PPL-09-E06                | 400 | E-112    | 91 | DN554254           |
|                                                                                           |                                                      |                                                                                        | Unknown Protein                             | PPL-12-D04                | 393 | E-110    | 89 | DN554628           |
| AT4G33010                                                                                 | Glycine Dehydrogenase                                | Metabolism/energy/membrane associated proteins                                         | Unknown Protein                             | PPL-08-_T3_C12            | 386 | E-108    | 90 | DN554151           |
|                                                                                           |                                                      |                                                                                        | Putative Glycine Dehydrogenase              | PPL-06-D12                | 403 | E-113    | 94 | DN553964           |
|                                                                                           |                                                      |                                                                                        | Unknown Protein                             | PPL-24-F04                | 358 | E-100    | 90 | DN556203           |
|                                                                                           |                                                      |                                                                                        | Unknown Protein                             | PPL-20-G03                | 209 | 4.00E-55 | 94 | DN555754           |
|                                                                                           |                                                      |                                                                                        | Cinnamoyl-Coa Reductase                     | PPL-16-C11                | 148 | 6.00E-37 | 78 | DN556355           |
|                                                                                           |                                                      |                                                                                        | Profilin 1                                  | PPL-18-G06                | 349 | 2.00E-97 | 90 | DN555850           |
|                                                                                           |                                                      |                                                                                        | Pectinesterase Like Protein                 | PPL-17-H12                | 332 | 3.00E-92 | 85 | DN555590           |
|                                                                                           |                                                      |                                                                                        | Unknown Protein                             | PPL-12-D04                | 394 | E-111    | 90 | DN554628           |
|                                                                                           |                                                      |                                                                                        | Unknown Protein                             | PPL-06-G02                | 289 | 3.00E-79 | 85 | DN553988           |
|                                                                                           |                                                      |                                                                                        | Unknown Protein                             | PPL-09-E06                | 402 | E-113    | 92 | DN554254           |
|                                                                                           |                                                      |                                                                                        | Unknown Protein                             | PPL-08-_T3_C12            | 394 | E-111    | 91 | DN554151           |
| AT3G14415                                                                                 | Glycolate Oxidase, Putative                          | Metabolism/energy/membrane associated proteins                                         | Glycolate Oxidase Like Protein              | PPL-06-E08                | 355 | 4.00E-99 | 89 | DN553971           |
|                                                                                           |                                                      |                                                                                        | Pectinesterase Like Protein                 | PPL-21-G03                | 178 | 4.00E-46 | 92 | DN555940           |
|                                                                                           |                                                      |                                                                                        | Glycolate Oxidase Like Protein              | PPL-09-H06                | 376 | E-105    | 90 | DN554288           |
| AT2G21330                                                                                 | Fructose-Bisphosphate Aldolase                       | Metabolism/energy/membrane associated proteins                                         | Fructose Bisphosphate Aldolase Like Protein | PPL-06-E12                | 216 | 2.00E-57 | 82 | DN553975           |
|                                                                                           |                                                      |                                                                                        | Unknown Protein                             | PPL-17-A02                | 128 | 3.00E-31 | 74 | DN555504           |
|                                                                                           |                                                      |                                                                                        | Hsp 70-Like Protein                         | PPL-17-C09                | 366 | E-102    | 89 | DN555533           |
|                                                                                           |                                                      |                                                                                        | Unknown Protein                             | PPL-16-C07                | 231 | 6.00E-62 | 83 | DN556351           |
|                                                                                           |                                                      |                                                                                        | Pectinesterase Like Protein                 | PPL-13-F10                | 344 | 8.00E-96 | 82 | DN554745           |
|                                                                                           |                                                      |                                                                                        | Fructose-Bisphosphate Aldolase Like Protein | PPL-06-F07; PPL-13-G11    | 230 | 3.00E-64 | 90 | DN553981; DN554758 |
|                                                                                           |                                                      |                                                                                        | Unknown Protein                             | PPL-08-_T3_A02            | 251 | 5.00E-68 | 87 | DN554119           |
|                                                                                           |                                                      |                                                                                        | Unknown Protein                             | PPL-07-_T3_E03            | 380 | E-106    | 89 | DN554075           |
| AT2G01140                                                                                 | Fructose-Bisphosphate Aldolase                       | Metabolism/energy/membrane associated proteins                                         | Fructose Bisphosphate Aldolase Like Protein | PPL-06-E12                | 187 | 2.00E-48 | 46 | DN553975           |
|                                                                                           |                                                      |                                                                                        | Unknown Protein                             | PPL-17-A02                | 100 | 1.00E-22 | 65 | DN555504           |
|                                                                                           |                                                      |                                                                                        | Hsp 70-Like Protein                         | PPL-17-C09                | 346 | 3.00E-96 | 83 | DN555533           |
|                                                                                           |                                                      |                                                                                        | Unknown Protein                             | PPL-16-C07                | 201 | 6.00E-53 | 77 | DN556351           |
|                                                                                           |                                                      |                                                                                        | Pectinesterase Like Protein                 | PPL-13-F10                | 305 | 4.00E-84 | 77 | DN554745           |
|                                                                                           |                                                      |                                                                                        | Fructose-Bisphosphate Aldolase Like Protein | PPL-06-F07; PPL-13-G11    | 201 | 6.00E-53 | 73 | DN553975; DN554758 |
|                                                                                           |                                                      |                                                                                        | Unknown Protein                             | PPL-08-_T3_A02            | 231 | 4.00E-62 | 80 | DN554119           |

|            |                                                    |                                                |                                                                                                                                                                                               |                                                                                                              |                                                      |                                                                                              |                                              |                                                                                              |
|------------|----------------------------------------------------|------------------------------------------------|-----------------------------------------------------------------------------------------------------------------------------------------------------------------------------------------------|--------------------------------------------------------------------------------------------------------------|------------------------------------------------------|----------------------------------------------------------------------------------------------|----------------------------------------------|----------------------------------------------------------------------------------------------|
| AT3G52930  | Fructose-Bisphosphate Aldolase                     | Metabolism/energy/membrane associated proteins | Unknown Protein<br>Fructose-Bisphosphate Aldolase Like Protein<br>Hsp 70-Like Protein<br>Unknown Protein<br>Fructose-Bisphosphate Aldolase Like Protein<br>Unknown Protein<br>Unknown Protein | PPL-07-_T3_E03<br>PPL-06-F07<br>PPL-17-C09<br>PPL-08-_T3_A02<br>PPL-13-G11<br>PPL-10-H02<br>PPL-07-_T3_E03   | 359<br>163<br>107<br>79<br>145<br>180<br>107         | E-100<br>2.00E-41<br>2.00E-49<br>5.00E-24<br>5.00E-36<br>1.00E-47<br>6.00E-51                | 84<br>59<br>54<br>65<br>59<br>74<br>54       | DN554075<br>DN553975<br>DN555533<br>DN554119<br>DN554758<br>DN554490<br>DN554075             |
| AT4G26530  | Fructose-Bisphosphate Aldolase                     | Metabolism/energy/membrane associated proteins | Unknown Protein<br>Fructose-Bisphosphate Aldolase Like Protein<br>Unknown Protein                                                                                                             | PPL-07-_T3_E03; PPL-17-C09<br>PPL-13-G11<br>PPL-10-H02                                                       | 105<br>163<br>214                                    | 2.00E-50<br>2.00E-41<br>8.00E-57                                                             | 54<br>54<br>84                               | DN554075; DN555533<br>DN554758<br>DN554490                                                   |
| AT1G56190  | Phosphoglycerate Kinase, Putative                  | Metabolism/energy/membrane associated proteins | 14-3-3 Protein Epsilon<br>Unknown Protein<br>14-3-3 Protein<br>Proteasome Component C5<br>Unknown Protein<br>Unknown Protein<br>Unknown Protein<br>Unknown Protein                            | PPL-06-G05<br>PPL-23-C11<br>PPL-06-G05<br>PPL-11-H07<br>PPL-09-H04<br>PPL-09-H04<br>PPL-23-C11<br>PPL-11-H07 | 155<br>230<br>139<br>297<br>309<br>264<br>212<br>311 | 4.00E-39<br>1.00E-61<br>3.00E-34<br>7.00E-82<br>7.00E-85<br>1.00E-71<br>3.00E-56<br>7.00E-86 | 85<br>86<br>89<br>86<br>85<br>78<br>91<br>85 | DN553991<br>DN556083<br>DN553991<br>DN554585<br>DN554286<br>DN554286<br>DN556083<br>DN554585 |
| AT1G79550  | Phosphoglycerate Kinase, Putative                  | Metabolism/energy/membrane associated proteins | Unknown Protein<br>Unknown Protein<br>Unknown Protein<br>Unknown Protein<br>Cellulose Synthase Catalytic Subunit                                                                              | PPL-11-H07<br>PPL-06-H12<br>PPL-07-_T3_A09<br>PPL-07-_T3_A09<br>PPL-07-_T3_A09                               | 159<br>383<br>315<br>220                             | 4.00E-40<br>E-107<br>3.00E-87<br>7.00E-82                                                    | 50<br>94<br>77<br>69                         | DN554007<br>DN554039<br>DN554039<br>DN554039                                                 |
| AT3G04120  | Glyceraldehyde-3-Phosphate Dehydrogenase           | Metabolism/energy/membrane associated proteins | Unknown Protein                                                                                                                                                                               | PPL-07-_T3_B07                                                                                               | 348                                                  | 2.00E-96                                                                                     | 83                                           | DN554046                                                                                     |
| AT4G39350  | Cellulose Synthase                                 | Metabolism/energy/membrane associated proteins | Unknown Protein                                                                                                                                                                               | PPL-07-_T3_F01                                                                                               | 376                                                  | E-104                                                                                        | 90                                           | DN554084                                                                                     |
| AT5G05170  |                                                    |                                                | Water Channel - Like Protein                                                                                                                                                                  | PPL-07-_T3_F07                                                                                               | 125                                                  | 3.00E-44                                                                                     | 77                                           | DN554089                                                                                     |
| AT4G32410  |                                                    |                                                | Unknown Protein                                                                                                                                                                               | PPL-07-_T3_F12                                                                                               | 135                                                  | 1.00E-33                                                                                     | 69                                           | DN554094                                                                                     |
| AT4G18780  | Dihydropyrimidinase                                | Metabolism/energy/membrane associated proteins | Unknown Protein                                                                                                                                                                               | PPL-07-_T3_F12                                                                                               | 128                                                  | 2.00E-31                                                                                     | 66                                           | DN554094                                                                                     |
| AT3G52200  | 5-Methyltetrahydropteroyltriglutamate-Homocysteine | Metabolism/energy/membrane associated proteins | Unknown Protein                                                                                                                                                                               | PPL-07-_T3_G08                                                                                               | 158                                                  | 8.00E-40                                                                                     | 77                                           | DN554102                                                                                     |
| AT4G27440  | Protochlorophyllide Reductase B                    | Metabolism/energy/membrane associated proteins | Unknown Protein                                                                                                                                                                               | PPL-08-_T3_A12                                                                                               | 215                                                  | 5.00E-57                                                                                     | 84                                           | DN554129                                                                                     |
| AT4G23460  | Beta-Adaptin                                       | Metabolism/energy/membrane associated proteins | Unknown Protein                                                                                                                                                                               | PPL-09-A06                                                                                                   | 369                                                  | E-103                                                                                        | 93                                           | DN554214                                                                                     |
| AT4G11380  | Beta-Adaptin                                       | Metabolism/energy/membrane associated proteins | Unknown Protein                                                                                                                                                                               | PPL-09-A06                                                                                                   | 359                                                  | E-100                                                                                        | 90                                           | DN554214                                                                                     |
| ATI7G7380  | Amino Acid Carrier, Putative                       | Metabolism/energy/membrane associated proteins | Unknown Protein                                                                                                                                                                               | PPL-09-A06                                                                                                   | 221                                                  | 1.00E-58                                                                                     | 53                                           | DN554214                                                                                     |
| ATI6G8010  | Glycerate Dehydrogenase                            | Metabolism/energy/membrane associated proteins | Unknown Protein                                                                                                                                                                               | PPL-09-F06                                                                                                   | 143                                                  | 3.00E-35                                                                                     | 95                                           | DN554265                                                                                     |
| ATS6G04140 | Glutamate Synthase (Glu1)                          | Metabolism/energy/membrane associated proteins | Unknown Protein                                                                                                                                                                               | PPL-20-E09                                                                                                   | 348                                                  | 2.00E-96                                                                                     | 87                                           | DN555737                                                                                     |
| AT2G41220  | Glutamate Synthase (Glu1)                          | Metabolism/energy/membrane associated proteins | Unknown Protein                                                                                                                                                                               | PPL-18-D02                                                                                                   | 106                                                  | 2.00E-24                                                                                     | 71                                           | DN555810                                                                                     |
| ATS5G3460  | Glutamate Synthase (Glu1)                          | Metabolism/energy/membrane associated proteins | Unknown Protein                                                                                                                                                                               | PPL-16-D10                                                                                                   | 345                                                  | 8.00E-96                                                                                     | 78                                           | DN556365                                                                                     |
| AT3G17820  | Glutamine Synthetase (Gs1)                         | Metabolism/energy/membrane associated proteins | Unknown Protein                                                                                                                                                                               | PPL-12-A06                                                                                                   | 261                                                  | 6.00E-71                                                                                     | 88                                           | DN554596                                                                                     |
|            |                                                    |                                                | Unknown Protein                                                                                                                                                                               | PPL-09-F11                                                                                                   | 127                                                  | 1.00E-30                                                                                     | 53                                           | DN554270                                                                                     |
| AT5G36890  | Glycosyl Hydrolase Family 1 Protein                | Metabolism/energy/membrane associated proteins | Water Channel - Like Protein<br>Unknown Protein                                                                                                                                               | PPL-10-B09                                                                                                   | 300                                                  | 1.00E-82                                                                                     | 83                                           | DN554428                                                                                     |
| AT3G18090  | Dna-Directed Rna Polymerase Family Protein         | Metabolism/energy/membrane associated proteins | Unknown Protein                                                                                                                                                                               | PPL-08-_T3_D07                                                                                               | 188                                                  | 4.00E-49                                                                                     | 80                                           | DN554157                                                                                     |
| ATI1G1840  | Lactoylglutathione Lyase, Putative                 | Metabolism/energy/membrane associated proteins | Glyoxalase I<br>Adp-Ribosylation Factor 1<br>Beta-Galactosidase Like Protein<br>Unknown Protein<br>Pollen-Specific Protein<br>Unknown Protein                                                 | PPL-22-E09<br>PPL-18-B02<br>PPL-11-F04<br>PPL-11-B03<br>PPL-10-H06                                           | 315<br>170<br>317<br>297<br>357                      | 5.00E-87<br>2.00E-43<br>7.00E-87<br>4.00E-81<br>E-100                                        | 86<br>83<br>80<br>85<br>91                   | DN556017<br>DN555788<br>DN554562<br>DN554516<br>DN554494                                     |
| AT5G13630  | Magnesium-Chelatase Subunit                        | Metabolism/energy/membrane associated proteins | Unknown Protein                                                                                                                                                                               | PPL-11-A04                                                                                                   | 193                                                  | 3.00E-57                                                                                     | 75                                           | DN554505                                                                                     |
| AT5G56630  | Phosphotransferase Family Protein                  | Metabolism/energy/membrane associated proteins | Putative 60S Ribosomal Protein L35                                                                                                                                                            | PPL-12-C05                                                                                                   | 138                                                  | 2.00E-50                                                                                     | 70                                           | DN554617                                                                                     |
| AT4G25420  | Gibberellin 20-Oxidase                             | Metabolism/energy/membrane associated proteins | Gibberellin 20-Oxidase<br>Rubisco Activase<br>Unknown Protein<br>Unknown Protein                                                                                                              | PPL-12-C09<br>PPL-25-H10<br>PPL-22-F10                                                                       | 380<br>159<br>203                                    | E-107<br>2.00E-40<br>2.00E-53                                                                | 85<br>74<br>78                               | DN554621<br>DN556321<br>DN556028                                                             |
| AT2G39730  | Ribulose Bisphosphate Carboxylase                  | Metabolism/energy/membrane associated proteins | Cysteine Proteinase Inhibitor Like Protein<br>Probable Photosystem I Chain Xi Precursor                                                                                                       | PPL-21-G07<br>PPL-19-B07                                                                                     | 215<br>218                                           | 7.00E-69<br>6.00E-58                                                                         | 77<br>93                                     | DN555944<br>DN555609                                                                         |
| ATI6G2380  | 1-Aminocyclopropane-1-Carboxylate Oxidase          | Metabolism/energy/membrane associated proteins | Pectinesterase Like Protein<br>Pectinesterase Like Protein<br>Pectinesterase Like Protein                                                                                                     | PPL-12-H03<br>PPL-25-B01<br>PPL-12-H03                                                                       | 285<br>202<br>285                                    | 9.00E-78<br>8.00E-53<br>9.00E-78                                                             | 62<br>55<br>64                               | DN554673<br>DN556244<br>DN554673                                                             |
| ATI1G2010  | 1-Aminocyclopropane-1-Carboxylate Oxidase          | Metabolism/energy/membrane associated proteins | Pectinesterase Like Protein<br>Unknown Protein                                                                                                                                                | PPL-25-B01<br>PPL-13-A09                                                                                     | 206<br>189                                           | 1.00E-54<br>5.00E-50                                                                         | 59<br>91                                     | DN556244<br>DN554690                                                                         |
| ATI92590   | S-Adenosylmethionine Synthetase 1                  | Metabolism/energy/membrane associated proteins | Unknown Protein                                                                                                                                                                               | PPL-13-A09                                                                                                   | 189                                                  | 5.00E-50                                                                                     | 91                                           | DN554690                                                                                     |
| AT4G01850  | S-Adenosylmethionine Synthetase 2                  | Metabolism/energy/membrane associated proteins | Unknown Protein                                                                                                                                                                               | PPL-13-A09                                                                                                   | 189                                                  | 2.00E-49                                                                                     | 89                                           | DN554690                                                                                     |
| AT3G47860  | Apolipoprotein D-Related                           | Metabolism/energy/membrane associated proteins | Unknown Protein                                                                                                                                                                               | PPL-13-F05                                                                                                   | 286                                                  | 1.00E-90                                                                                     | 80                                           | DN554740                                                                                     |
| AT3G50990  | Similar To Peroxidase 72 (Per72)                   | Metabolism/energy/membrane associated proteins | Unknown Protein                                                                                                                                                                               | PPL-14-B06                                                                                                   | 126                                                  | 3.00E-31                                                                                     | 52                                           | DN554788                                                                                     |
| AT3G57520  | Alkaline Alpha Galactosidase, Putative             | Metabolism/energy/membrane associated proteins | Unknown Protein                                                                                                                                                                               | PPL-15-D05                                                                                                   | 359                                                  | E-100                                                                                        | 89                                           | DN554891                                                                                     |
| AT3G16240  | Delta Tomoplast Integral Protein                   | Metabolism/energy/membrane associated proteins | Water Channel - Like Protein                                                                                                                                                                  | PPL-17-H11                                                                                                   | 296                                                  | 2.00E-81                                                                                     | 81                                           | DN555589                                                                                     |
| AT2G36830  | Major Intrinsic Family Protein                     | Metabolism/energy/membrane associated proteins | Water Channel - Like Protein                                                                                                                                                                  | PPL-17-H11                                                                                                   | 231                                                  | 9.00E-62                                                                                     | 64                                           | DN555589                                                                                     |
| AT4G39800  | Myo-Inositol-1-Phosphate Synthase 1                | Metabolism/energy/membrane associated proteins | Putative Beta-1,3-Glucanase<br>Water Channel - Like Protein                                                                                                                                   | PPL-19-C09<br>PPL-19-E12                                                                                     | 177<br>243                                           | 2.00E-45<br>1.00E-65                                                                         | 91<br>64                                     | DN555623<br>DN555649                                                                         |
| AT5G53370  | Pectinesterase Family Protein                      | Metabolism/energy/membrane associated proteins | Water Channel - Like Protein                                                                                                                                                                  | PPL-19-E12                                                                                                   | 219                                                  | 2.00E-58                                                                                     | 58                                           | DN555649                                                                                     |
| AT3G43270  | Pectinesterase Family Protein                      | Metabolism/energy/membrane associated proteins | Water Channel - Like Protein                                                                                                                                                                  | PPL-19-E12                                                                                                   | 130                                                  | 3.00E-45                                                                                     | 56                                           | DN555649                                                                                     |
| AT5G09760  | Pectinesterase Family Protein                      | Metabolism/energy/membrane associated proteins | Unknown Protein                                                                                                                                                                               | PPL-19-F10                                                                                                   | 137                                                  | 1.00E-33                                                                                     | 53                                           | DN555659                                                                                     |
| AT4G04610  | 5'-Adenylylsulfate Reductase                       | Metabolism/energy/membrane associated proteins | Unknown Protein                                                                                                                                                                               | PPL-19-G02                                                                                                   | 332                                                  | 2.00E-92                                                                                     | 87                                           | DN555663                                                                                     |
| AT3G17820  | Glutamine Synthetase (Gs1)                         | Metabolism/energy/membrane associated proteins | Nad Dependent Epimerase, Putative<br>Water Channel - Like Protein                                                                                                                             | PPL-19-H01<br>PPL-19-H01                                                                                     | 130<br>100                                           | 2.00E-92<br>2.00E-32                                                                         | 87<br>81                                     | DN555663<br>DN555673                                                                         |
| ATI1G31300 | Photosystem I Reaction Center Subunit              | Metabolism/energy/membrane associated proteins | Unknown Protein                                                                                                                                                                               | PPL-23-A05                                                                                                   | 278                                                  | 5.00E-76                                                                                     | 85                                           | DN556055                                                                                     |
| AT4G04610  | 5'-Adenylylsulfate Reductase                       | Metabolism/energy/membrane associated proteins | Prh26<br>Unknown Protein                                                                                                                                                                      | PPL-18-H04<br>PPL-23-E09                                                                                     | 157<br>131                                           | 9.00E-78<br>8.00E-32                                                                         | 82<br>79                                     | DN555859<br>DN556103                                                                         |
| AT5G24300  | Starch Synthase                                    | Metabolism/energy/membrane associated proteins | Water Channel - Like Protein                                                                                                                                                                  | PPL-18-H07                                                                                                   | 312                                                  | 1.00E-85                                                                                     | 78                                           | DN555862                                                                                     |
| ATI5G6190  | Phosphoglycerate Kinase                            | Metabolism/energy/membrane associated proteins | Subtilisin-Like Proteinase<br>Unknown Protein                                                                                                                                                 | PPL-19-A10<br>PPL-19-B12                                                                                     | 101<br>322                                           | 6.00E-23<br>3.00E-89                                                                         | 83<br>89                                     | DN555600<br>DN555614                                                                         |
| ATI1G79550 | Phosphoglycerate Kinase                            | Metabolism/energy/membrane associated proteins | Unknown Protein                                                                                                                                                                               | PPL-19-B12                                                                                                   | 318                                                  | 5.00E-88                                                                                     | 89                                           | DN555614                                                                                     |
| ATI1G15690 | Pyrophosphate-Energized Vacuolar                   | Metabolism/energy/membrane associated proteins | Unknown Protein                                                                                                                                                                               | PPL-21-E10                                                                                                   | 180                                                  | 1.00E-46                                                                                     | 75                                           | DN555923                                                                                     |

|                                                                  |                                                    |                                                        |                                                              |                 |     |          |     |          |
|------------------------------------------------------------------|----------------------------------------------------|--------------------------------------------------------|--------------------------------------------------------------|-----------------|-----|----------|-----|----------|
| AT3G03780                                                        | 5-Methyltetrahydropteroyltriglutamate-Homocysteine | Metabolism/energy/membrane associated proteins         | Unknown Protein                                              | PPL-22-C12      | 116 | 3.00E-27 | 85  | DN555996 |
| AT1G56190                                                        | Phosphoglycerate Kinase, Putative                  | Metabolism/energy/membrane associated proteins         | Pectinesterase Like Protein                                  | PPL-21-E11      | 308 | 3.00E-83 | 85  | DN555924 |
| AT1G79550                                                        | Phosphoglycerate Kinase, Putative                  | Metabolism/energy/membrane associated proteins         | Endoxyloglucan Transferase-Like Protein                      | PPL-21-F11      | 144 | 1.00E-35 | 86  | DN555936 |
| AT4G00430                                                        | Plasma Membrane Intrinsic Protein                  | Metabolism/energy/membrane associated proteins         | Endoxyloglucan Transferase-Like Protein                      | PPL-21-F11      | 128 | 7.00E-31 | 91  | DN555936 |
|                                                                  |                                                    |                                                        | Unknown Protein                                              | PPL-21-B06      | 209 | 3.00E-55 | 92  | DN555884 |
| AT1G31710                                                        | Copper Amine Oxidase                               | Metabolism/energy/membrane associated proteins         | Unknown Protein                                              | PPL-24-E10      | 226 | 1.00E-60 | 92  | DN556279 |
|                                                                  |                                                    |                                                        | Pectinesterase Like Protein                                  | PPL-24-F10      | 108 | 2.00E-41 | 58  | DN556197 |
| AT3G25230                                                        | Peptidyl-Prolyl Cis-Trans Isomerase                | Metabolism/energy/membrane associated proteins         | Pectinesterase Like Protein                                  | PPL-24-F09      | 110 | 7.00E-42 | 58  | DN556209 |
| AT5G48570                                                        | Peptidyl-Prolyl Cis-Trans Isomerase                | Metabolism/energy/membrane associated proteins         | Pectinesterase Like Protein                                  | PPL-24-F09      | 292 | 9.00E-78 | 81  | DN556208 |
| AT2G18940                                                        | Pentatricopeptide (Ppr Repeat-Containing Protein   | Metabolism/energy/membrane associated proteins         | Pectinesterase Like Protein                                  | PPL-24-F09      | 291 | 2.00E-77 | 79  | DN556208 |
| AT3G17240                                                        | Dihydropyrimidine Dehydrogenase 2                  | Metabolism/energy/membrane associated proteins         | Flavonoid 3',5'-Hydroxylase -Like Protein                    | PPL-25-A11      | 269 | 3.00E-73 | 76  | DN556242 |
| AT3G16910                                                        | Acetyl-Coa Synthetase                              | Metabolism/energy/membrane associated proteins         | Water Channel - Like Protein                                 | PPL-23-B07      | 136 | 2.00E-33 | 88  | DN556067 |
| AT5G48300                                                        | Glucose-1-Phosphate Adenylyltransferase            | Metabolism/energy/membrane associated proteins         | Unknown Protein                                              | PPL-23-C03      | 108 | 5.00E-47 | 55  | DN556075 |
|                                                                  |                                                    |                                                        | Cucumisin Precursor                                          | PPL-23-D02      | 122 | 5.00E-29 | 69  | DN556086 |
| AT5G06290                                                        | 2-Cys Peroxiredoxin, Chloroplast                   | Metabolism/energy/membrane associated proteins         | Pectinesterase Like Protein                                  | PPL-23-F06      | 151 | 6.00E-38 | 97  | DN556112 |
|                                                                  |                                                    |                                                        | Unknown Protein                                              | PPL-25-F12      | 177 | 8.00E-46 | 87  | DN556300 |
| <b>F. Proteins with binding function or cofactor requirement</b> |                                                    |                                                        |                                                              |                 |     |          |     |          |
| AT3G56940                                                        | Dicarboxylate Diiron Protein, Putative             | Proteins with binding function or cofactor requirement | Unknown Protein                                              | PPL-01-F09F09   | 101 | 5.00E-23 | 71  | DN552942 |
|                                                                  |                                                    |                                                        | Water Channel - Like Protein                                 | PPL-25-E04      | 377 | E-106    | 97  | DN556281 |
|                                                                  |                                                    |                                                        | Water Channel - Like Protein                                 | PPL-14-G11      | 294 | 9.00E-81 | 85  | DN554843 |
|                                                                  |                                                    |                                                        | S-Adenosylmethionine Synthetase                              | PPL-08-_T3__B12 | 417 | E-118    | 97  | DN554141 |
| AT1G48630                                                        | Activated Protein Kinase C Receptor, Putative      | Proteins with binding function or cofactor requirement | Guanine Nucleotide-Binding Protein Beta Subunit-Like Protein | PPL-06-D02      | 363 | E-101    | 86  | DN553955 |
| AT1G18080                                                        | Wd-40 Repeat Family Protein                        | Proteins with binding function or cofactor requirement | Guanine Nucleotide-Binding Protein Beta Subunit-Like Protein | PPL-06-D02      | 303 | 2.00E-96 | 83  | DN553955 |
| AT1G20980                                                        | Spl1-Related2 Protein                              | Proteins with binding function or cofactor requirement | Squamosa Promoter Binding Protein-Like                       | PPL-06-D10      | 145 | 4.00E-35 | 59  | DN553962 |
|                                                                  |                                                    |                                                        | Unknown Protein                                              | PPL-10-D09      | 148 | 8.00E-37 | 60  | DN554452 |
| AT3G60030                                                        | Squamosa Promoter-Binding Protein                  | Proteins with binding function or cofactor requirement | Squamosa Promoter Binding Protein-Like                       | PPL-06-D10      | 141 | 7.00E-34 | 71  | DN553962 |
|                                                                  |                                                    |                                                        | Unknown Protein                                              | PPL-10-D09      | 145 | 5.00E-36 | 65  | DN554452 |
| AT3G17880                                                        | Tetratricoredoxin (T4s)                            | Proteins with binding function or cofactor requirement | Thioredoxin H                                                | PPL-06-F09      | 123 | 3.00E-29 | 41  | DN553983 |
| AT1G35550                                                        | Elongation Factor Tu C-Terminal Domain             | Proteins with binding function or cofactor requirement | Unknown Protein                                              | PPL-10-C01      | 256 | 2.00E-69 | 80  | DN554432 |
|                                                                  |                                                    |                                                        | Translation Elongation Factor Eef-1 Alpha Chain              | PPL-13-E06      | 102 | 5.00E-23 | 77  | DN554729 |
| AT4G17520                                                        | Nuclear Rna-Binding Protein                        | Proteins with binding function or cofactor requirement | Unknown Protein                                              | PPL-08-_T3__D02 | 107 | 1.00E-27 | 44  | DN554153 |
| AT2G24820                                                        | Rieske (2Fe-2S) Domain                             | Proteins with binding function or cofactor requirement | Ps 1 Antenna Protein Lhca2 Fragment                          | PPL-14-B09      | 142 | 5.00E-35 | 67  | DN554791 |
|                                                                  |                                                    |                                                        | Unknown Protein                                              | PPL-16-G03      | 116 | 3.00E-27 | 65  | DN556392 |
| AT4G24800                                                        | Ma3 Domain-Containing Protein                      | Proteins with binding function or cofactor requirement | Unknown Protein                                              | PPL-13-D07      | 166 | 1.00E-47 | 82  | DN554718 |
| AT1G46768                                                        | Erf1/Api2 Transcription Factor                     | Proteins with binding function or cofactor requirement | Ribosomal Protein L29, Putative                              | PPL-17-B09      | 100 | 2.00E-22 | 62  | DN555522 |
| AT1G62480                                                        | Dna-Binding Family Protein                         | Proteins with binding function or cofactor requirement | Rps7A - Ribosomal Protein                                    | PPL-20-B10      | 136 | 3.00E-33 | 55  | DN554702 |
| AT5G67470                                                        | Formin Homology 2 Domain                           | Proteins with binding function or cofactor requirement | Water Channel - Like Protein                                 | PPL-17-G06      | 174 | 3.00E-47 | 86  | DN555573 |
| AT3G62300                                                        | Agemat Domain-Containing Protein                   | Proteins with binding function or cofactor requirement | Water Channel - Like Protein                                 | PPL-23-A10      | 141 | 2.00E-34 | 52  | DN556059 |
| AT2G28000                                                        | Robisco Subunit-Binding-Protein                    | Proteins with binding function or cofactor requirement | Nucleoid Dna-Binding-Like Protein                            | PPL-24-C09      | 247 | 2.00E-71 | 86  | DN556174 |
| AT2G43770                                                        | Transducin Family Protein                          | Proteins with binding function or cofactor requirement | Unknown Protein                                              | PPL-25-G04      | 319 | 1.00E-88 | 89  | DN556304 |
| <b>G. Protein synthesis and translation</b>                      |                                                    |                                                        |                                                              |                 |     |          |     |          |
| AT1G15810                                                        | Ribosomal Protein S15 Family Protein               | Protein synthesis and translation                      | Chlorophyll A/B-Binding Protein                              | PPL-06-F03      | 178 | 5.00E-46 | 92  | DN553978 |
|                                                                  |                                                    |                                                        | Unknown Protein                                              | PPL-25-B09      | 242 | 3.00E-65 | 86  | DN556252 |
|                                                                  |                                                    |                                                        | Pectinesterase Like Protein                                  | PPL-24-C01      | 237 | 5.00E-64 | 86  | DN556166 |
|                                                                  |                                                    |                                                        | Unknown Protein                                              | PPL-23-G01      | 271 | 6.00E-74 | 89  | DN556119 |
|                                                                  |                                                    |                                                        | Unknown Protein                                              | PPL-23-B01      | 208 | 3.00E-55 | 84  | DN556062 |
|                                                                  |                                                    |                                                        | Unknown Protein                                              | PPL-17-B10      | 105 | 1.00E-24 | 86  | DN555523 |
|                                                                  |                                                    |                                                        | Pectinesterase Like Protein                                  | PPL-18-E08      | 253 | 9.00E-69 | 90  | DN555828 |
|                                                                  |                                                    |                                                        | Unknown Protein                                              | PPL-18-E10      | 104 | 3.00E-24 | 90  | DN555830 |
|                                                                  |                                                    |                                                        | Unknown Protein                                              | PPL-18-D07      | 341 | 7.00E-95 | 87  | DN555815 |
|                                                                  |                                                    |                                                        | Pectinesterase Like Protein                                  | PPL-17-E08      | 274 | 6.00E-75 | 87  | DN555554 |
|                                                                  |                                                    |                                                        | Unknown Protein                                              | PPL-09-A03      | 234 | 8.00E-63 | 90  | DN554211 |
|                                                                  |                                                    |                                                        | Putative Ribosomal Protein L28                               | PPL-11-F12      | 188 | 4.00E-49 | 92  | DN554570 |
|                                                                  |                                                    |                                                        | Unknown Protein                                              | PPL-12-G05      | 215 | 3.00E-57 | 85  | DN554663 |
|                                                                  |                                                    |                                                        | Unknown Protein                                              | PPL-09-C07      | 199 | 3.00E-52 | 92  | DN554233 |
|                                                                  |                                                    |                                                        | Unknown Protein                                              | PPL-08-_T3__B10 | 267 | 7.00E-73 | 87  | DN554139 |
| AT1G43170                                                        | 60S Ribosomal Protein L3                           | Protein synthesis and translation                      | Unknown Protein                                              | PPL-08-_T3__F01 | 180 | 1.00E-46 | 80  | DN554175 |
|                                                                  |                                                    |                                                        | Unknown Protein                                              | PPL-19-G08      | 157 | 1.00E-39 | 80  | DN555668 |
| AT1G79850                                                        | 30S Ribosomal Protein S17                          | Protein synthesis and translation                      | Pollen Allergen -Like Protein                                | PPL-06-A11      | 174 | 5.00E-44 | 62  | DN553934 |
| AT5G60390                                                        | Elongation Factor 1-Alpha                          | Protein synthesis and translation                      | Unknown Protein                                              | PPL-10-C01      | 352 | 2.00E-98 | 94  | DN554432 |
|                                                                  |                                                    |                                                        | Translation Elongation Factor Eef-1 Alpha Chain              | PPL-13-E06      | 133 | 1.00E-32 | 91  | DN554729 |
|                                                                  |                                                    |                                                        | Unknown Protein                                              | PPL-10-C10      | 350 | 1.00E-97 | 94  | DN554441 |
| AT1G62750                                                        | Elongation Factor Tu Family Protein                | Protein synthesis and translation                      | Flavanone 3-Hydroxylase (Fh3)                                | PPL-10-G03      | 152 | 2.00E-38 | 89  | DN554480 |
| AT3G63490                                                        | Ribosomal Protein L1 Family Protein                | Protein synthesis and translation                      | Unknown Protein                                              | PPL-15-E08      | 234 | 7.00E-63 | 85  | DN554905 |
| AT3G13580                                                        | 60S Ribosomal Protein L7                           | Protein synthesis and translation                      | Unknown Protein                                              | PPL-21-F09      | 127 | 5.00E-31 | 92  | DN555934 |
| AT1G02780                                                        | 60S Ribosomal Protein L19                          | Protein synthesis and translation                      | Water Channel - Like Protein                                 | PPL-22-C01      | 117 | 1.00E-27 | 75  | DN555985 |
| <b>H. Protein fate</b>                                           |                                                    |                                                        |                                                              |                 |     |          |     |          |
| AT1G62510                                                        | Protease Inhibitor                                 | Protein fate                                           | Unknown Protein                                              | PPL-25-C03      | 127 | 2.00E-31 | 51  | DN556257 |
| AT5G20620                                                        | Polyubiquitin (Ubq4)                               | Protein fate                                           | Unknown Protein                                              | PPL-08-_T3__G05 | 256 | 2.00E-69 | 100 | DN554190 |
|                                                                  |                                                    |                                                        | Unknown Protein                                              | PPL-23-H10      | 326 | 1.00E-89 | 97  | DN556140 |
|                                                                  |                                                    |                                                        | Unknown Protein                                              | PPL-14-H11      | 391 | E-108    | 99  | DN554855 |
| AT1G53930                                                        | Ubiquitin Family Protein                           | Protein fate                                           | Unknown Protein                                              | PPL-08-_T3__G05 | 131 | 8.00E-32 | 75  | DN554190 |
|                                                                  |                                                    |                                                        | Unknown Protein                                              | PPL-23-H10      | 130 | 3.00E-31 | 76  | DN556140 |
|                                                                  |                                                    |                                                        | Unknown Protein                                              | PPL-14-H11      | 131 | 1.00E-31 | 75  | DN554855 |
| AT1G09130                                                        | Atp-Dependent Clp Protease                         | Protein fate                                           | Clpp Protease Complex Subunit Clp1                           | PPL-08-_T3__H01 | 164 | 3.00E-41 | 51  | DN554198 |
| AT4G20850                                                        | Subtilase Family Protein                           | Protein fate                                           | Pectinesterase Like Protein                                  | PPL-19-A11      | 101 | 9.00E-23 | 66  | DN555601 |

|                                                                                                                                                             |                                              |                                                                                 |                                             |                |     |           |    |          |
|-------------------------------------------------------------------------------------------------------------------------------------------------------------|----------------------------------------------|---------------------------------------------------------------------------------|---------------------------------------------|----------------|-----|-----------|----|----------|
| AT3G22120                                                                                                                                                   | Protease Inhibitor                           | Protein fate                                                                    | Unknown Protein                             | PPL-25-C03     | 118 | 8.00E-54  | 73 | DN556257 |
| AT2G10940                                                                                                                                                   | Protease Inhibitor                           | Protein fate                                                                    | Unknown Protein                             | PPL-25-C03     | 167 | 8.00E-43  | 50 | DN556257 |
| <b>I. Transcription/splicing/RNA processing/modification</b>                                                                                                |                                              |                                                                                 |                                             |                |     |           |    |          |
| AT2G42280                                                                                                                                                   | Basic Helix-Loop-Helix (Bhlh) Family Protein | Transcription/splicing/RNA processing/modification                              | Peroxidase - Like Protein                   | PPL04-H11      | 156 | 2.00E-39  | 71 | DN553224 |
| AT1G51140                                                                                                                                                   | Basic Helix-Loop-Helix (Bhlh) Family Protein | Transcription/splicing/RNA processing/modification                              | Peroxidase - Like Protein                   | PPL04-H11      | 153 | 2.00E-38  | 72 | DN553224 |
| AT1G68520                                                                                                                                                   | Zinc Finger (B-Box Type) Family              | Transcription/splicing/RNA processing/modification                              | Zinc Finger Protein                         | PPL-06-C08     | 109 | 3.00E-25  | 90 | DN553950 |
| AT1G32750                                                                                                                                                   | Hac13 Protein (Hac13)                        | Transcription/splicing/RNA processing/modification                              | Unknown Protein                             | PPL-10-F12     | 161 | 8.00E-41  | 74 | DN554477 |
| AT3G02380                                                                                                                                                   | Zinc Finger Protein Constans                 | Transcription/splicing/RNA processing/modification                              | Unknown Protein                             | PPL-25-B10     | 246 | 2.00E-66  | 74 | DN556253 |
| AT5G15850                                                                                                                                                   | Zinc Finger Protein Constans                 | Transcription/splicing/RNA processing/modification                              | Unknown Protein                             | PPL-17-H01     | 109 | 4.00E-25  | 71 | DN555580 |
|                                                                                                                                                             |                                              |                                                                                 | Unknown Protein                             | PPL-17-H01     | 105 | 8.00E-24  | 75 | DN555580 |
| <b>J. Transporters</b>                                                                                                                                      |                                              |                                                                                 |                                             |                |     |           |    |          |
| AT3G62770                                                                                                                                                   | Transport Protein-Related                    | Transporters                                                                    | Unknown Protein                             | PPL-07_-T3_D05 | 166 | 6.00E-73  | 81 | DN554066 |
| AT1G06950                                                                                                                                                   | Protein Import Into The Chloroplast          | Transporters                                                                    | Unknown Protein                             | PPL-07_-T3_E07 | 113 | 2.00E-40  | 77 | DN554079 |
| AT3G27020                                                                                                                                                   | Oligopeptide Transporter                     | Transporters                                                                    | Unknown Protein                             | PPL-07_-T3_E10 | 224 | 3.00E-74  | 60 | DN554081 |
| AT4G39170                                                                                                                                                   | Sec14 Cytosolic Factor, Putative             | Transporters                                                                    | Unknown Protein                             | PPL-16-E12     | 137 | 2.00E-33  | 88 | DN556377 |
| AT5G64840                                                                                                                                                   | Abc Transporter Family Protein               | Transporters                                                                    | Abc Transporter                             | PPL-22-C03     | 331 | 5.00E-92  | 87 | DN555987 |
| <b>L. Unknown</b>                                                                                                                                           |                                              |                                                                                 |                                             |                |     |           |    |          |
| AT3G01060                                                                                                                                                   | Expressed Protein                            | Unknown                                                                         | Unknown Protein                             | PPL-18-A01     | 327 | 7.00E-91  | 92 | DN555775 |
| AT1G21680                                                                                                                                                   | Expressed Protein                            | Unknown                                                                         | Aquaporin 4                                 | PPL-19-H06     | 154 | 4.00E-41  | 77 | DN555677 |
| AT4G28910                                                                                                                                                   | Expressed Protein                            | Unknown                                                                         | Pectinesterase Like Protein                 | PPL-20-F10     | 176 | 6.00E-49  | 81 | DN555749 |
| AT2G42310                                                                                                                                                   | Expressed Protein                            | Unknown                                                                         | Unknown Protein                             | PPL-10-C09     | 182 | 5.00E-47  | 80 | DN554440 |
| AT5G04460                                                                                                                                                   | Expressed Protein                            | Unknown                                                                         | Subtilisin-Like Proteinase                  | PPL-10-F11     | 115 | 3.00E-35  | 69 | DN554476 |
| AT5G57930                                                                                                                                                   | Expressed Protein                            | Unknown                                                                         | Cucumisin Precursor                         | PPL-17-A09     | 146 | 3.00E-36  | 91 | DN555511 |
| AT2G30900                                                                                                                                                   | Expressed Protein                            | Unknown                                                                         | Flavonol Synthase -Like                     | PPL-10-G08     | 138 | 5.00E-47  | 59 | DN554485 |
| AT5G16730                                                                                                                                                   | Expressed Protein                            | Unknown                                                                         | Unknown Protein                             | PPL-11-H04     | 100 | 3.00E-47  | 51 | DN554583 |
| AT1G09310                                                                                                                                                   | Expressed Protein                            | Unknown                                                                         | Unknown Protein                             | PPL-13-D06     | 127 | 8.00E-30  | 60 | DN554717 |
|                                                                                                                                                             |                                              |                                                                                 | Water Channel - Like Protein                | PPL-17-F04     | 182 | 4.00E-53  | 69 | DN555560 |
|                                                                                                                                                             |                                              |                                                                                 | Unknown Protein                             | PPL-21-C05     | 107 | 5.00E-32  | 71 | DN555895 |
|                                                                                                                                                             |                                              |                                                                                 | Water Channel - Like Protein                | PPL-17-F04     | 131 | 6.00E-31  | 49 | DN555560 |
| AT3G46780                                                                                                                                                   | Expressed Protein                            | Unknown                                                                         | Unknown Protein                             | PPL-07_-T3_C10 | 143 | 6.00E-36  | 69 | DN554060 |
| <b>II. Arabidopsis gene sequences significantly repressed by PPV in the infected leaf tissues show sequence similarity to <i>Fraxus persica</i> uniESTs</b> |                                              |                                                                                 |                                             |                |     |           |    |          |
| <b>A. Defence and virulence</b>                                                                                                                             |                                              |                                                                                 |                                             |                |     |           |    |          |
| AT5G38480                                                                                                                                                   | 14-3-3 protein; GRF3                         | Defence and virulence                                                           | General regulatory factor 3                 | PPL-10-A05     | 186 | 3.00E-51  | 82 | DN554412 |
|                                                                                                                                                             |                                              |                                                                                 | General regulatory factor 3                 | PPL-24-G03     | 186 | 3.00E-51  | 82 | DN556214 |
|                                                                                                                                                             |                                              |                                                                                 | General regulatory factor 3                 | PPL-17-F01     | 141 | 2.00E-37  | 83 | DN555558 |
| AT5G16400                                                                                                                                                   | Thioredoxin, putative                        | Defence and virulence                                                           | Thioredoxin, putative                       | PPL-20-E02     | 111 | 1.00E-28  | 80 | DN555730 |
|                                                                                                                                                             |                                              |                                                                                 | Thioredoxin, putative                       | PPL-16-E02     | 137 | 2.00E-36  | 81 | DN556368 |
| <b>C. Cell Cycle/ DNA processing/chromatin regulation and cytoskeleton reorganization</b>                                                                   |                                              |                                                                                 |                                             |                |     |           |    |          |
| AT3G45980                                                                                                                                                   | Histone H2B                                  | Cell Cycle/ DNA processing/chromatin regulation and cytoskeleton reorganization | Histone H2B                                 | PPL-04-A09     | 129 | 2.00E-34  | 87 | DN553147 |
| AT3G54560                                                                                                                                                   | Histone H2A/E/Z                              |                                                                                 | Histone H2A/E/Z                             | PPL-04-D03     | 194 | 7.00E-54  | 87 | DN553174 |
| <b>E. Metabolism/energy/membrane associated proteins</b>                                                                                                    |                                              |                                                                                 |                                             |                |     |           |    |          |
| AT5G64040                                                                                                                                                   | Photosystem I reaction center subunit PSI-N  | Primary/secondary metabolism                                                    | Photosystem I reaction center subunit PSI-N | PPL-15-E03     | 258 | 6.00E-73  | 87 | DN554901 |
| <b>F. Proteins with binding function or cofactor requirement</b>                                                                                            |                                              |                                                                                 |                                             |                |     |           |    |          |
| AT3G42830                                                                                                                                                   | Ring-box protein Roc1/Rbx1/Hrt1, putative    | Proteins with binding function or cofactor requirement                          | Ring-box protein Roc1/Rbx1/Hrt1, putative   | PPL-16-H04     | 151 | 5.00E-41  | 84 | DN556405 |
| AT4G17530                                                                                                                                                   | Ras-related GTP-binding protein, putative    | Proteins with binding function or cofactor requirement                          | Ras-related GTP-binding protein, putative   | PPL-16-E07     | 254 | 1.00E-71  | 85 | DN556372 |
| AT5G20570                                                                                                                                                   | Ring-box protein-related                     | Proteins with binding function or cofactor requirement                          | Ring-box protein-related                    | PPL-16-H04     | 208 | 5.00E-58  | 85 | DN556405 |
| <b>G. Protein synthesis and translation</b>                                                                                                                 |                                              |                                                                                 |                                             |                |     |           |    |          |
| AT2G19750                                                                                                                                                   | 40S ribosomal protein S30;RPS30A             | Protein synthesis and translation                                               | 40S ribosomal protein S30                   | PPL-25-D04     | 161 | 3.00E-44  | 86 | DN556270 |
|                                                                                                                                                             |                                              |                                                                                 | 40S ribosomal protein S30                   | PPL-01-G02G11  | 119 | 7.00E-32  | 86 | DN556431 |
| AT3G06700                                                                                                                                                   | 60S ribosomal protein L29;RPL29A             | Protein synthesis and translation                                               | 60S ribosomal protein L29-1; RPL29A         | PPL-17-H07     | 161 | 3.00E-44  | 86 | DN555585 |
| AT4G29390                                                                                                                                                   | 40S ribosomal protein S30;RPS30B             | Protein synthesis and translation                                               | 40S ribosomal protein S30;RPS30B            | PPL-24-B06     | 105 | 3.00E-27  | 84 | DN556159 |
|                                                                                                                                                             |                                              |                                                                                 | 40S ribosomal protein S30;RPS30B            | PPL-25-D04     | 141 | 7.00E-38  | 84 | DN556270 |
|                                                                                                                                                             |                                              |                                                                                 | 40S ribosomal protein S30;RPS30B            | PPL-01-G02G11  | 105 | 3.00E-27  | 85 | DN556431 |
|                                                                                                                                                             |                                              |                                                                                 | 40S ribosomal protein S30;RPS30B            | PPL-17-H07     | 141 | 7.00E-38  | 84 | DN555585 |
| AT5G56670                                                                                                                                                   | 40S ribosomal protein S30;RPS30C             | Protein synthesis and translation                                               | 40S ribosomal protein S30;RPS30B            | PPL-25-D04     | 153 | 6.00E-42  | 85 | DN556270 |
|                                                                                                                                                             |                                              |                                                                                 | 40S ribosomal protein S30;RPS30B            | PPL-17-H07     | 153 | 7.00E-42  | 85 | DN555585 |
| <b>H. Protein fate</b>                                                                                                                                      |                                              |                                                                                 |                                             |                |     |           |    |          |
| AT2G36170                                                                                                                                                   | Ubiquitin extension protein 2; UBQ2          | Ubiquitin like conjugating enzyme activity                                      | Ubiquitin extension protein 2; UBQ2         | PPL-03-B07     | 133 | 1.00E-35  | 88 | DN553076 |
|                                                                                                                                                             |                                              |                                                                                 | Ubiquitin extension protein 2; UBQ2         | PPL-14-H11     | 131 | 1.00E-34  | 84 | DN554855 |
| AT3G52590                                                                                                                                                   | Ubiquitin extension protein 1; UBQ1          | Ubiquitin like conjugating enzyme activity                                      | Ubiquitin extension protein 1; UBQ1         | PPL-03-B07     | 105 | 3.00E-27  | 85 | DN553076 |
|                                                                                                                                                             |                                              |                                                                                 | Ubiquitin extension protein 1; UBQ1         | PPL-08_-T3_G05 | 113 | 2.00E-29  | 82 | DN554190 |
|                                                                                                                                                             |                                              |                                                                                 | Ubiquitin extension protein 1; UBQ1         | PPL-14-H11     | 170 | 1.00E-46  | 85 | DN554855 |
| AT5G55160                                                                                                                                                   | Small ubiquitin-like modifier 2; SUMO        | Ubiquitin like conjugating enzyme activity                                      | Small ubiquitin-like modifier 2; SUMO       | PPL-10-A04     | 228 | 5.00E-64  | 87 | DN554411 |
| <b>L. Unknown</b>                                                                                                                                           |                                              |                                                                                 |                                             |                |     |           |    |          |
| AT1G68660                                                                                                                                                   | Expressed protein                            | Unknown proteins                                                                | Unknown protein                             | PPL-06-G06     | 103 | 3.00E-26  | 80 | DN553992 |
| AT2G07739                                                                                                                                                   | Expressed protein                            | Unknown proteins                                                                | Unknown protein                             | PPL-02-H02     | 424 | 4.00E-123 | 95 | DN553049 |
| AT5G64816                                                                                                                                                   | Expressed protein                            | Unknown proteins                                                                | Unknown protein                             | PPL-01-B11B11  | 141 | 8.00E-38  | 82 | DN552912 |

\*AGI represents *Arabidopsis* Genome Initiative (AGI) locus identifier that corresponds to each gene represented on the array.

<sup>b</sup> *Arabidopsis* -genome array, containing 22,810 probe sets representing approximately 24,000 gene sequences.

<sup>c</sup> Determined following the method of the *Arabidopsis* MIPS (Munich Information Centre for Protein Sequences) functional classification scheme.

<sup>d</sup> Gene description of peach orthologs was from the PPL EST sequences extracted from NCBI non-redundant dbESTs.

<sup>e</sup> PPL ESTs represent sequences derived from PPV-infected peach leaf EST library [63].

<sup>f</sup> HSP, High-scoring pair. The BLAST output for each transcript was parsed for HSP and its associated E-value. Any hits with the existence of HSP<sub>≥</sub> 100 and with an E-value<sub>≤</sub> 10<sup>-20</sup> was taken as an indicative of significant similarity [69].

<sup>g</sup> Percent sequence similarity of PPV induced *Arabidopsis* transcripts to the PPL uniEST sequences.

<sup>h</sup> GenBank identifiers of the peach orthologs.
