# Supplementary material for: Altered gene expression changes in Arabidopsis leaf tissues and protoplasts in response to Plum pox virus infection
Source: PubMed Central journal article supplement (PMC2478689; doi:10.1186/1471-2164-9-325), 2008-07-09
Supplement: 1471-2164-9-325-S10.pdf [file 1471-2164-9-325-S10.pdf]

**Supplemental Table 8.** Cross comparison of genes significantly differentially regulated by PPV ( $\geq 2.5$ - or  $\leq -2.5$ -fold) in this study with the *Arabidopsis* genes regulated by other positive sense RNA viruses

| AGI locus                                                                               | Arabidopsis gene differentially regulated in this study                              | FC <sup>a</sup> | FC <sup>b</sup> | FC; hpi, ssRNA virus       | References              |
|-----------------------------------------------------------------------------------------|--------------------------------------------------------------------------------------|-----------------|-----------------|----------------------------|-------------------------|
| <b>Group A. Genes induced by infections of PPV and other positive sense RNA viruses</b> |                                                                                      |                 |                 |                            |                         |
| At1g12010                                                                               | 1-Aminocyclopropane-1-Carboxylate Oxidase, Putative / Acc Oxidase, Putative          | 3.58            |                 | 1.7 ; 48; CMV-Y            | Ishihara et al. (2004)  |
| At5g20000                                                                               | 26S Proteasome Aaa-Atpase Subunit, Putative                                          | 2.72            |                 | 1.65 ; 48; CMV-Y           | Ishihara et al. (2004)  |
| At5g05780                                                                               | 26S Proteasome Non-Atpase Regulatory Subunit 7, Putative                             | 1.95            |                 | 3.83 ; 48; CMV-Y           | Ishihara et al. (2004)  |
| At2g37220                                                                               | 29 Kda Ribonucleoprotein, Chloroplast, Putative / Rna-Binding Protein Cp29, Putative | 3.16            |                 | 1.15 ; 48; CMV-Y           | Ishihara et al. (2004)  |
| At4g39980                                                                               | 2-Dehydro-3-Deoxyphosphoheptonate Aldolase 1                                         | 1.68            |                 | 1.94 ; 48; CMV-Y           | Ishihara et al. (2004)  |
| At5g23010                                                                               | 2-Isopropylmalate Synthase 3 (Ims3)                                                  | 2.55            |                 | 1.48 ; 6; CMV-Y            | Ishihara et al. (2004)  |
| At2g25450                                                                               | 2-Oxoglutarate-Dependent Dioxygenase, Putative                                       | 2.31            |                 | 10.3 ; 12; CMV-Y           | Ishihara et al. (2004)  |
| At1g79850                                                                               | 30S Ribosomal Protein S17, Chloroplast / Cs17 (Rps17)                                | 2.53            |                 | 1.99 ; 48; CMV-Y           | Ishihara et al. (2004)  |
| At2g31610                                                                               | 40S Ribosomal Protein S3 (Rps3A)                                                     | 1.56            |                 | 4.64 ; 48; CMV-Y           | Ishihara et al. (2004)  |
| At3g14990                                                                               | 4-Methyl-5(B-Hydroxyethyl)-Thiazole Monophosphate Biosynthesis Protein, Putative     | 1.56            |                 | 2.26 ; 48; CMV-Y           | Ishihara et al. (2004)  |
| At1g07320                                                                               | 50S Ribosomal Protein L4, Chloroplast (Cl4)                                          | 1.59            |                 | 1.11 ; 24; CMV-Y           | Ishihara et al. (2004)  |
| At3g44590                                                                               | 60S Acidic Ribosomal Protein P2 (Rpp2D)                                              | 2.25            |                 | 2.49 ; 12; CMV-Y           | Ishihara et al. (2004)  |
| At3g55130                                                                               | ABC Transporter Family Protein                                                       | 2.14            |                 | 0.7 ; 3, 5 and 18 ; CMV-Y  | Marathe et al. (2004)   |
| At5g64840                                                                               | ABC Transporter Family Protein                                                       | 4.34            |                 | 1.13 ; 6 ; CMV-Y           | Ishihara et al. (2004)  |
| At1g49240                                                                               | Actin 8 (Act8)                                                                       | 2.74            |                 | 1.63 ; 24 ; CMV-Y          | Ishihara et al. (2004)  |
| At2g38440                                                                               | Actin Microfilament                                                                  | 5.24            |                 | 1.02 ; 6 ; CMV-Y           | Ishihara et al. (2004)  |
| At3g05420                                                                               | Acyl-Coa Binding Family Protein                                                      | 2.91            |                 | 4.74 ; 12 ; CMV-Y          | Ishihara et al. (2004)  |
| At4g27780                                                                               | Acyl-Coa Binding Protein 2 (Acbp2)                                                   | 4.24            |                 | 1 ; 6 ; CMV-Y              | Ishihara et al. (2004)  |
| At4g16760                                                                               | Acyl-Coa Oxidase (Acx1)                                                              | 3.72            |                 | 1.87 ; 48 ; CMV-Y          | Ishihara et al. (2004)  |
| At3g23810                                                                               | Adenosylhomocysteinase, Putative                                                     | 1.98            |                 | 1.26 ; 6 ; CMV-Y           | Ishihara et al. (2004)  |
| At4g17330                                                                               | Agenet Domain-Containing Protein                                                     | 6.61            |                 | 3.28 ; 12 ; CMV-Y          | Ishihara et al. (2004)  |
| At1g54100                                                                               | Aldehyde Dehydrogenase, Putative / Antiquitin, Putative                              | 2.35            |                 | 1.81 ; 24 ; CMV-Y          | Ishihara et al. (2004)  |
| At2g37770                                                                               | Aldo/Keto Reductase Family Protein                                                   | 3.18            |                 | 2.1-5.4; 4 ; TMV           | Golem and Culver (2003) |
| At1g11860                                                                               | Aminomethyltransferase, Putative                                                     | 2.62            |                 | 1.39 ; 6; CMV-Y            | Ishihara et al. (2004)  |
| At4g13510                                                                               | Ammonium Transporter 1, Member 1 (Amt1.1)                                            | 3.43            |                 | 1.63 ; 48 ; CMV-Y          | Ishihara et al. (2004)  |
| At2g38290                                                                               | Ammonium Transporter 2 (Amt2)                                                        | 2.71            |                 | 3.3 ; 48 ; CMV-Y           | Ishihara et al. (2004)  |
| At4g26370                                                                               | Antitermination Nusb Domain-Containing Protein                                       | 2.12            |                 | 1.24 ; 6 ; CMV-Y           | Ishihara et al. (2004)  |
| At5g65010                                                                               | Asparagine Synthetase 2 (Asn2)                                                       | 3.66            |                 | 2.14 ; 12 ; CMV-Y          | Ishihara et al. (2004)  |
| At5g19550                                                                               | Aspartate Aminotransferase, Cytoplasmic Isozyme 1 / Transaminase A (Asp2)            | 2.99            |                 | 1.82 ; 48 ; CMV-Y          | Ishihara et al. (2004)  |
| At3g54400                                                                               | Aspartyl Protease Family Protein                                                     | 1.42            |                 | 0.75 ; 3, 5 and 18 ; CMV-Y | Marathe et al. (2004)   |
| At4g30190                                                                               | Atpase 2, Plasma Membrane-Type, Putative                                             | 2.64            |                 | 1.05 ; 48 ; CMV-Y          | Ishihara et al. (2004)  |
| At2g42280                                                                               | Basic Helix-Loop-Helix (Bhlh) Family Protein                                         | 10.59           |                 | 1.77 ; 3, 5 and 18 ; CMV-Y | Marathe et al. (2004)   |
| At4g16430                                                                               | Basic Helix-Loop-Helix (Bhlh) Family Protein                                         | 1.71            |                 | 1.88 ; 48 ; CMV-Y          | Ishihara et al. (2004)  |
| At4g36540                                                                               | Basic Helix-Loop-Helix (Bhlh) Family Protein                                         | 1.98            |                 | 1.34 ; 3, 5 and 18 ; CMV-Y | Marathe et al. (2004)   |
| At4g15210                                                                               | Beta-Amylase (Bmy1)                                                                  | 1.71            |                 | 1.65 ; 48 ; CMV-Y          | Ishihara et al. (2004)  |
| At2g26250                                                                               | Beta-Ketoacyl-Coa Synthase Family (Fiddlehead) (Fdh)                                 | 4.36            |                 | 1.12 ; 6 ; CMV-Y           | Ishihara et al. (2004)  |
| At3g49680                                                                               | Branched-Chain Amino Acid Aminotransferase 3                                         | 2.14            |                 | 1.97 ; 24 ; CMV-Y          | Ishihara et al. (2004)  |
| At5g62390                                                                               | Calmodulin-Binding Family Protein                                                    | 2.26            |                 | 1.53 ; 6 ; CMV-Y           | Ishihara et al. (2004)  |
| At5g61790                                                                               | Calnexin 1 (Cnx1)                                                                    | 3.87            |                 | 4.49 ; 48 ; CMV-Y          | Ishihara et al. (2004)  |
| At1g56340                                                                               | Calreticulin 1 (Crt1)                                                                | 3.28            |                 | 5.15 ; 48 ; CMV-Y          | Ishihara et al. (2004)  |
| At4g35090                                                                               | Catalase 2                                                                           | 3.56            |                 | 1.54 ; 6 ; CMV-Y           | Ishihara et al. (2004)  |
| At5g01810                                                                               | Cbl-Interacting Protein Kinase 15 (Cipk15)                                           | 2.24            |                 | 2.13 ; 48 ; CMV-Y          | Ishihara et al. (2004)  |
| At1g72830                                                                               | CCAAT-Binding Transcription Factor (Cbf-B/Nf-Ya) Family Protein                      | 1.43            |                 | 2.63 ; 48 ; CMV-Y          | Ishihara et al. (2004)  |
| At5g47640                                                                               | CCAAT-Box Binding Transcription Factor Subunit B                                     | 1.25            |                 | -5.03 ; 48 ; CMV-Y         | Ishihara et al. (2004)  |
| At3g19820                                                                               | Cell Elongation Protein / Dwarf1 / Diminuto (Dim)                                    | 5.46            |                 | 1.49 ; 24 ; CMV-Y          | Ishihara et al. (2004)  |
| At5g05170                                                                               | Cellulose Synthase, Catalytic Subunit (Ath-B)                                        | 3.25            |                 | 1.24 ; 6 ; CMV-Y           | Ishihara et al. (2004)  |
| At1g02205                                                                               | Cer1 Protein                                                                         | 7.04            |                 | 0.63 ; 3, 5 and 18 ; CMV-Y | Marathe et al. (2004)   |

|           |                                                                                  |      |                                           |                        |
|-----------|----------------------------------------------------------------------------------|------|-------------------------------------------|------------------------|
| At5g13930 | Chalcone Synthase / Naringenin-Chalcone Synthase                                 | 9.13 | 1.3 ; 12; CMV-Y                           | Ishihara et al. (2004) |
| At2g38000 | Chaperone Protein Dnaj-Related                                                   | 2.06 | 2.1–2.6; 5; CMV-Y                         | Ishihara et al. (2004) |
| At2g28000 | Chaperonin Alpha Subunit                                                         | 3.06 | 1.99 ; 24; CMV-Y                          | Ishihara et al. (2004) |
| At3g02530 | Chaperonin, Putative                                                             | 2.02 | 2.08 ; 24; CMV-Y                          | Ishihara et al. (2004) |
| At3g51820 | Chlorophyll Synthetase, Putative                                                 | 1.82 | 1.23 ; 12; CMV-Y                          | Ishihara et al. (2004) |
| At2g30490 | Cinnamic Acid 4-Hydroxylase (C4H)                                                | 1.84 | 2.09 ; 48; CMV-Y                          | Ishihara et al. (2004) |
| At2g44350 | Citrate Synthase, Mitochondrial, Putative                                        | 1.70 | 1.55 ; 6; CMV-Y                           | Ishihara et al. (2004) |
| At5g61900 | Copine Bonzai1 (Bon1)                                                            | 1.20 | 3.64 ; 48; CMV-Y                          | Ishihara et al. (2004) |
| At4g37430 | Cytochrome P450 81F1 (Cyp81F1) (Cyp91A2)                                         | 1.48 | 5.0–24.4 ; 5 ; TVCV, ORMV, PVX, CMV, TuMV | Whitham et al. (2003)  |
| At4g13770 | Cytochrome P450 Family Protein                                                   | 2.07 | 1.16 ; 6; CMV-Y                           | Ishihara et al. (2004) |
| At4g37330 | Cytochrome P450 Family Protein                                                   | 1.60 | 2.23 ; 24; CMV-Y                          | Ishihara et al. (2004) |
| At1g60420 | Dc1 Domain-Containing Protein                                                    | 1.91 | 2.3 ; 24; CMV-Y                           | Ishihara et al. (2004) |
| At3g58510 | Dead Box Rna Helicase, Putative (Rh11)                                           | 2.52 | 2.57 ; 12; CMV-Y                          | Ishihara et al. (2004) |
| At4g00660 | Dead/Deah Box Helicase, Putative                                                 | 2.29 | 1.82 ; 12; CMV-Y                          | Ishihara et al. (2004) |
| At2g47940 | Degp2 Protease (Degp2)                                                           | 3.41 | 1.1 ; 12; CMV-Y                           | Ishihara et al. (2004) |
| At1g72040 | Deoxynucleoside Kinase Family                                                    | 3.84 | 1.29 ; 6; CMV-Y                           | Ishihara et al. (2004) |
| At5g23450 | Diacylglycerol Kinase Family Protein                                             | 2.57 | -1.59 ; 48; CMV-Y                         | Ishihara et al. (2004) |
| At3g56940 | Dicarboxylate Diiron Protein, Putative (Crd1)                                    | 2.53 | 1.41 ; 24; CMV-Y                          | Ishihara et al. (2004) |
| At4g33300 | Disease Resistance Protein (Cc-Nbs-Lrr Class), Putative                          | 2.10 | 4.57 ; 48; CMV-Y                          | Ishihara et al. (2004) |
| At2g20560 | DNAJ Heat Shock Family Protein                                                   | 3.75 | 0.62 ; 3, 5 and 18; CMV-Y                 | Marathe et al. (2004)  |
| At3g44110 | DNAJ Heat Shock Protein, Putative (J3)                                           | 4.66 | 1.4 ; 24; CMV-Y                           | Ishihara et al. (2004) |
| At1g59610 | Dynammin-Like Protein, Putative (Adl3)                                           | 4.87 | 3.25 ; 48; CMV-Y                          | Ishihara et al. (2004) |
| At4g24510 | Eceriferum Protein (Cer2)                                                        | 1.83 | 0.6 ; 3, 5 and 18; CMV-Y                  | Marathe et al. (2004)  |
| At4g29060 | Elongation Factor Ts Family Protein                                              | 3.50 | 1.08 ; 12; CMV-Y                          | Ishihara et al. (2004) |
| At4g20360 | Elongation Factor Tu / Ef-Tu (Tufa)                                              | 1.44 | 1.39 ; 6; CMV-Y                           | Ishihara et al. (2004) |
| At2g46280 | Eukaryotic Translation Initiation Factor 3 ; Eif-3                               | 2.06 | 1.25 ; 48; CMV-Y                          | Ishihara et al. (2004) |
| At1g26770 | Expansin, Putative (Exp10)                                                       | 2.68 | 0.68 ; 3, 5 and 18; CMV-Y                 | Marathe et al. (2004)  |
| At1g09340 | Expressed Protein                                                                | 2.17 | 1.23 ; 6; CMV-Y                           | Ishihara et al. (2004) |
| At1g18620 | Expressed Protein                                                                | 2.57 | 1.39 ; 3, 5 and 18; CMV-Y                 | Marathe et al. (2004)  |
| At1g27200 | Expressed Protein                                                                | 2.05 | 2.7–4.4; 5 ; TVCV, ORMV, PVX, CMV, TuMV   | Whitham et al. (2003)  |
| At1g56660 | Expressed Protein                                                                | 4.04 | 2.23 ; 24; CMV-Y                          | Ishihara et al. (2004) |
| At1g64680 | Expressed Protein                                                                | 2.60 | 1.18 ; 6; CMV-Y                           | Ishihara et al. (2004) |
| At1g71970 | Expressed Protein                                                                | 3.46 | 1.36 ; 3, 5 and 18; CMV-Y                 | Marathe et al. (2004)  |
| At1g77500 | Expressed Protein                                                                | 2.24 | 1.24 ; 24; CMV-Y                          | Ishihara et al. (2004) |
| At1g79270 | Expressed Protein                                                                | 2.09 | 0.68 ; 3, 5 and 18; CMV-Y                 | Marathe et al. (2004)  |
| At2g37660 | Expressed Protein                                                                | 1.83 | 1.42 ; 6; CMV-Y                           | Ishihara et al. (2004) |
| At3g04630 | Expressed Protein                                                                | 3.06 | 0.68 ; 3, 5 and 18; CMV-Y                 | Marathe et al. (2004)  |
| At3g58600 | Expressed Protein                                                                | 1.77 | 5.99 ; 48; CMV-Y                          | Ishihara et al. (2004) |
| At3g63170 | Expressed Protein                                                                | 2.15 | 1.02 ; 12; CMV-Y                          | Ishihara et al. (2004) |
| At4g28080 | Expressed Protein                                                                | 6.62 | 1.03 ; 24; CMV-Y                          | Ishihara et al. (2004) |
| At4g28910 | Expressed Protein                                                                | 4.51 | 1.03 ; 6; CMV-Y                           | Ishihara et al. (2004) |
| At5g05250 | Expressed Protein                                                                | 1.59 | 1.6 ; 3, 5 and 18; CMV-Y                  | Marathe et al. (2004)  |
| At3g17710 | F-Box Family Protein                                                             | 2.21 | -2.1; 14; TMV                             | Ishihara et al. (2004) |
| At5g54160 | Flavonol 3-O-Methyltransferase 1                                                 | 2.40 | 3.02 ; 24; CMV-Y                          | Ishihara et al. (2004) |
| At3g52930 | Fructose-Bisphosphate Aldolase, Putative                                         | 5.32 | 2.02 ; 12; CMV-Y                          | Ishihara et al. (2004) |
| At1g74470 | Geranylgeranyl Reductase                                                         | 1.91 | 1.31 ; 12; CMV-Y                          | Ishihara et al. (2004) |
| At1g31910 | Ghmp Kinase Family Protein                                                       | 2.65 | 5.3 ; 48; CMV-Y                           | Ishihara et al. (2004) |
| At5g14920 | Gibberellin-Regulated Family Protein                                             | 3.04 | 1.84 ; 24; CMV-Y                          | Ishihara et al. (2004) |
| At2g13440 | Glucose-Inhibited Division Family A Protein                                      | 1.64 | 7.12 ; 12; CMV-Y                          | Ishihara et al. (2004) |
| At1g65960 | Glutamate Decarboxylase 2 (Gad 2)                                                | 1.74 | 4.94 ; 12; CMV-Y                          | Ishihara et al. (2004) |
| At5g04140 | Glutamate Synthase (Glu1) / Ferredoxin-Dependent Glutamate Synthase (Fd-Gogat 1) | 2.90 | 1.22 ; 6; CMV-Y                           | Ishihara et al. (2004) |
| At5g63570 | Glutamate-1-Semialdehyde 2,1-Aminomutase 1 (Gsa 1)                               | 2.33 | 3.62 ; 48; CMV-Y                          | Ishihara et al. (2004) |

|           |                                                                               |       |      |                           |                         |
|-----------|-------------------------------------------------------------------------------|-------|------|---------------------------|-------------------------|
| At4g23100 | Glutamate-Cysteine Ligase / Gamma-Glutamylcysteine Synthetase (Gsh1)          | 2.48  |      | 1.45 ; 12; CMV-Y          | Ishihara et al. (2004)  |
| At1g30400 | Glutathione S-Conjugate ABC Transporter (Mrp1)                                | 4.59  |      | 1.32 ; 24; CMV-Y          | Ishihara et al. (2004)  |
| At1g78370 | Glutathione S-Transferase, Putative                                           | 1.43  |      | 1.22 ; 6; CMV-Y           | Ishihara et al. (2004)  |
| At3g04120 | Glyceraldehyde-3-Phosphate Dehydrogenase, Cytosolic (Gapc)                    | 3.52  |      | 1.81 ; 48; CMV-Y          | Ishihara et al. (2004)  |
| At2g26080 | Glycine Dehydrogenase (Decarboxylating), Putative                             | 6.53  |      | 1.38 ; 24; CMV-Y          | Ishihara et al. (2004)  |
| At4g33010 | Glycine Dehydrogenase (Decarboxylating), Putative                             | 4.58  |      | 1.3 ; 6; CMV-Y            | Ishihara et al. (2004)  |
| At4g37930 | Glycine Hydroxymethyltransferase                                              | 1.85  |      | 1.21 ; 12; CMV-Y          | Ishihara et al. (2004)  |
| At1g52400 | Glycosyl Hydrolase Family 1 Protein / Beta-Glucosidase, Putative (Bg1)        | 2.80  |      | 4.78 ; 12; CMV-Y          | Ishihara et al. (2004)  |
| At2g18700 | Glycosyl Transferase Family 20 Protein / Trehalose-Phosphatase Family Protein | 3.55  |      | 1.8 ; 4; TMV              | Golem and Culver (2003) |
| At3g07160 | Glycosyl Transferase Family 48 Protein                                        | 2.34  |      | 3.33 ; 48; CMV-Y          | Ishihara et al. (2004)  |
| At5g56030 | Heat Shock Protein 81-2 (Hsp81-2)                                             | 4.63  |      | 0.67 ; 3, 5 and 18; CMV-Y | Marathe et al. (2004)   |
| At5g56000 | Heat Shock Protein 81-4 (Hsp81-4)                                             | 4.75  |      | 0.65 ; 3, 5 and 18; CMV-Y | Marathe et al. (2004)   |
| At1g56530 | Hydroxyproline-Rich Glycoprotein Family Protein                               | 8.00  | 7.94 | 0.73 ; 3, 5 and 18; CMV-Y | Marathe et al. (2004)   |
| At2g39050 | Hydroxyproline-Rich Glycoprotein Family Protein                               | 2.53  |      | 1.67 ; 12; CMV-Y          | Ishihara et al. (2004)  |
| At5g09530 | Hydroxyproline-Rich Glycoprotein Family Protein                               | 90.14 |      | 4.32 ; 48; CMV-Y          | Ishihara et al. (2004)  |
| At5g56650 | Iaa-Amino Acid Hydrolase 3 (Iar3) (III1)                                      | 1.62  |      | 1.35 ; 12; CMV-Y          | Ishihara et al. (2004)  |
| At5g10170 | Inositol-3-Phosphate Synthase, Putative                                       | 2.12  |      | 1.28 ; 24; CMV-Y          | Ishihara et al. (2004)  |
| At4g39240 | Kelch Repeat-Containing F-Box Family Protein                                  | 1.28  |      | 1.26 ; 6; CMV-Y           | Ishihara et al. (2004)  |
| At3g16630 | Kinesin Motor Family Protein                                                  | 2.23  |      | 1.32 ; 48; CMV-Y          | Ishihara et al. (2004)  |
| At3g12740 | Lem3 (Ligand-Effect Modulator 3) Family Protein / Cdc50 Family Protein        | 1.62  |      | 1.48 ; 24; CMV-Y          | Ishihara et al. (2004)  |
| At1g28440 | Leucine-Rich Repeat Transmembrane Protein Kinase, Putative                    | 1.90  |      | 2.76 ; 48; CMV-Y          | Ishihara et al. (2004)  |
| At1g73080 | Leucine-Rich Repeat Transmembrane Protein Kinase, Putative                    | 1.83  |      | 0.74 ; 3, 5 and 18; CMV-Y | Marathe et al. (2004)   |
| At5g28540 | Luminal Binding Protein 1 (Bip-1) (Bp1)                                       | 4.60  |      | 4.8 ; 48; CMV-Y           | Ishihara et al. (2004)  |
| At2g36830 | Major Intrinsic Family Protein / Mip Family Protein                           | 5.91  |      | 1.27 ; 12; CMV-Y          | Ishihara et al. (2004)  |
| At5g09660 | Malate Dehydrogenase, Glyoxysomal                                             | 1.58  |      | 1.36 ; 12; CMV-Y          | Ishihara et al. (2004)  |
| At3g18830 | Mannitol Transporter, Putative                                                | 1.80  |      | 1.48 ; 48; CMV-Y          | Ishihara et al. (2004)  |
| At5g12080 | Mechanosensitive Ion Channel Domain-Containing Protein                        | 2.29  |      | 1.85 ; 24; CMV-Y          | Ishihara et al. (2004)  |
| At1g15340 | Methyl-Cpg-Binding Domain-Containing Protein                                  | 4.97  |      | 1.41 ; 6; CMV-Y           | Ishihara et al. (2004)  |
| At4g34030 | Methylcrotonyl-Coa Carboxylase Beta Chain                                     | 2.86  |      | 1.02 ; 6; CMV-Y           | Ishihara et al. (2004)  |
| At1g25380 | Mitochondrial Substrate Carrier Family Protein                                | 1.42  |      | 2.24 ; 48; CMV-Y          | Ishihara et al. (2004)  |
| At2g43790 | Mitogen-Activated Protein Kinase, Putative / Mapk, Putative (Mpk6)            | 1.45  |      | 3.42 ; 12; CMV-Y          | Ishihara et al. (2004)  |
| At1g28010 | Multidrug Resistance P-Glycoprotein, Putative                                 | 3.11  |      | 0.63 ; 3, 5 and 18; CMV-Y | Marathe et al. (2004)   |
| At1g05320 | Myosin-Related                                                                | 2.53  |      | 1.13 ; 48; CMV-Y          | Ishihara et al. (2004)  |
| At1g54010 | Myosinase-Associated Protein, Putative                                        | 5.50  |      | 4.44 ; 24; CMV-Y          | Ishihara et al. (2004)  |
| At5g17770 | Nadh-Cytochrome B5 Reductase                                                  | 2.03  |      | 1.67 ; 6; CMV-Y           | Ishihara et al. (2004)  |
| At5g04950 | Nicotianamine Synthase, Putative                                              | 2.21  |      | 1.96 ; 6; CMV-Y           | Ishihara et al. (2004)  |
| At1g37130 | Nitrate Reductase 2 (Nr2)                                                     | 3.09  |      | 1.3 ; 6; CMV-Y            | Ishihara et al. (2004)  |
| At5g63310 | Nucleotide Diphosphate Kinase Ii, Chloroplast (Ndpk2)                         | 1.61  |      | 1.82 ; 12; CMV-Y          | Ishihara et al. (2004)  |
| At5g64290 | Oxoglutarate/Malate Translocator, Putative                                    | 4.90  |      | 1.15 ; 6; CMV-Y           | Ishihara et al. (2004)  |
| At3g09300 | Oxysterol-Binding Family Protein                                              | 1.98  |      | 1.9 ; 24; CMV-Y           | Ishihara et al. (2004)  |
| At3g54920 | Pectate Lyase, Putative / Powdery Mildew Susceptibility Protein (Pmr6)        | 1.40  |      | 1.03 ; 12; CMV-Y          | Ishihara et al. (2004)  |
| At1g11580 | Pectin Methyltransferase, Putative                                            | 1.79  |      | 2.2-3.8; 4; CMV-Y         | Ishihara et al. (2004)  |
| At4g33220 | Pectinesterase Family Protein                                                 | 1.49  |      | 6.99 ; 48; CMV-Y          | Ishihara et al. (2004)  |
| At2g15690 | Pentatricopeptide (Ppr) Repeat-Containing Protein                             | 3.78  |      | 1.02 ; 12; CMV-Y          | Ishihara et al. (2004)  |
| At3g04760 | Pentatricopeptide (Ppr) Repeat-Containing Protein                             | 1.80  |      | 1.13 ; 48; CMV-Y          | Ishihara et al. (2004)  |
| At1g12470 | Pep3/Vps18/Deep Orange Family Protein                                         | 2.58  |      | 2 ; 24; CMV-Y             | Ishihara et al. (2004)  |
| At2g42600 | Phosphoenolpyruvate Carboxylase, Putative / Pep Carboxylase, Putative (Ppc2)  | 5.26  |      | 1.53 ; 12; CMV-Y          | Ishihara et al. (2004)  |
| At3g18000 | Phosphoethanolamine N-Methyltransferase 1 / Peamt 1 (Nmt1)                    | 2.73  |      | 1.68 ; 24; CMV-Y          | Ishihara et al. (2004)  |
| At5g56630 | Phosphofructokinase Family Protein                                            | 2.56  |      | 2.09 ; 24; CMV-Y          | Ishihara et al. (2004)  |
| At5g61580 | Phosphofructokinase Family Protein                                            | 1.31  |      | 3.17 ; 48; CMV-Y          | Ishihara et al. (2004)  |
| At1g01610 | Phospholipid/Glycerol Acyltransferase Family Protein                          | 4.83  |      | 0.69 ; 3, 5 and 18; CMV-Y | Marathe et al. (2004)   |
| At1g32060 | Phosphoribulokinase (Prk) / Phosphopentokinase                                | 4.77  |      | 1.22 ; 6; CMV-Y           | Ishihara et al. (2004)  |

|           |                                                                                    |       |                                          |                        |
|-----------|------------------------------------------------------------------------------------|-------|------------------------------------------|------------------------|
| At3g19850 | Phototropic-Responsive Nph3 Family Protein                                         | 1.55  | 1.55 ; 3, 5 and 18; CMV-Y                | Marathe et al. (2004)  |
| At5g17870 | Plastid-Specific Ribosomal Protein-Related                                         | 3.03  | 1.18 ; 6; CMV-Y                          | Ishihara et al. (2004) |
| At1g76100 | Plastocyanin                                                                       | 1.96  | 1.51 ; 24; CMV-Y                         | Ishihara et al. (2004) |
| At5g65260 | Polyadenylate-Binding Protein Family Protein / Pabp Family Protein                 | 2.13  | 1.94 ; 12; CMV-Y                         | Ishihara et al. (2004) |
| At2g40540 | Potassium Transporter, Putative (Kt2)                                              | 2.38  | 1.33 ; 6; CMV-Y                          | Ishihara et al. (2004) |
| At3g43720 | Protease Inhibitor/Seed Storage/Lipid Transfer Protein (Ltp) Family Protein        | 1.99  | 0.7 ; 3, 5 and 18; CMV-Y                 | Marathe et al. (2004)  |
| At1g21750 | Protein Disulfide Isomerase, Putative                                              | 4.63  | 6.77 ; 48; CMV-Y                         | Ishihara et al. (2004) |
| At1g77510 | Protein Disulfide Isomerase, Putative                                              | 4.22  | 3.86 ; 48; CMV-Y                         | Ishihara et al. (2004) |
| At3g08760 | Protein Kinase Family Protein                                                      | 1.96  | 2.0-2.5 ; 4 ; TVCV, ORMV, PVX, CMV, TuMV | Whitham et al. (2003)  |
| At4g32250 | Protein Kinase Family Protein                                                      | 1.92  | 2.08 ; 24; CMV-Y                         | Ishihara et al. (2004) |
| At5g02760 | Protein Phosphatase 2C Family Protein / Pp2C Family Protein                        | 1.63  | 1.67 ; 3, 5 and 18; CMV-Y                | Marathe et al. (2004)  |
| At3g05640 | Protein Phosphatase 2C, Putative / Pp2C, Putative                                  | 2.55  | 0.53 ; 3, 5 and 18; CMV-Y                | Marathe et al. (2004)  |
| At4g01690 | Protoporphyrinogen Oxidase (Ppox)                                                  | 3.91  | 1.03 ; 12; CMV-Y                         | Ishihara et al. (2004) |
| At2g15190 | Pseudogene, Ulp1 Protease Family                                                   | 21.63 | 3.22 ; 3, 5 and 18; CMV-Y                | Marathe et al. (2004)  |
| At2g46790 | Pseudo-Response Regulator 9 (Apr9) / Timing Of Cab Expression 1-Like Protein (Tl1) | 1.61  | 0.73 ; 3, 5 and 18; CMV-Y                | Marathe et al. (2004)  |
| At2g36580 | Pyruvate Kinase, Putative                                                          | 3.83  | 2.27 ; 48; CMV-Y                         | Ishihara et al. (2004) |
| At1g19880 | Regulator Of Chromosome Condensation (Rcc1) Family Protein                         | 1.63  | 1.29 ; 6; CMV-Y                          | Ishihara et al. (2004) |
| At2g40760 | Rhodanese-Like Domain-Containing Protein                                           | 1.79  | 2.2-3.4; 4; TVCV, ORMV, PVX, CMV, TuMV   | Whitham et al. (2003)  |
| At2g39730 | Ribulose Bisphosphate Carboxylase/Oxygenase Activase / Rubisco Activase            | 4.11  | 1.03 ; 6; CMV-Y                          | Ishihara et al. (2004) |
| At1g32490 | Rna Helicase, Putative                                                             | 3.99  | 1.42 ; 48; CMV-Y                         | Ishihara et al. (2004) |
| At5g54900 | Rna-Binding Protein 45 (Rbp45), Putative                                           | 1.79  | 1.04 ; 6; CMV-Y                          | Ishihara et al. (2004) |
| At3g52380 | RNA-Binding Protein Cp33, Putative                                                 | 1.53  | 1.7 ; 24; CMV-Y                          | Ishihara et al. (2004) |
| At4g17230 | Scarecrow-Like Transcription Factor 13 (Scl13)                                     | 2.92  | 4.28 ; 48; CMV-Y                         | Ishihara et al. (2004) |
| At3g17410 | Serine/Threonine Protein Kinase, Putative                                          | 3.36  | 1.95 ; 48; CMV-Y                         | Ishihara et al. (2004) |
| At3g58040 | Seven In Absentia (Sina) Family Protein                                            | 2.88  | 1.62 ; 48; CMV-Y                         | Ishihara et al. (2004) |
| At5g49530 | SIN-Like Family Protein                                                            | 2.23  | 2.43 ; 12; CMV-Y                         | Ishihara et al. (2004) |
| At5g53120 | Spermidine Synthase, Putative / Putrescine Aminopropyltransferase, Putative        | 2.30  | 1.92 ; 12; CMV-Y                         | Ishihara et al. (2004) |
| At3g10420 | Sporulation Protein-Related                                                        | 3.27  | 3.47 ; 48; CMV-Y                         | Ishihara et al. (2004) |
| At5g66760 | Succinate Dehydrogenase (Ubiquinone) Flavoprotein                                  | 3.01  | 1.48 ; 24; CMV-Y                         | Ishihara et al. (2004) |
| At1g12520 | Superoxide Dismutase Copper Chaperone, Putative                                    | 2.93  | 2.6-4.3 ; 5; TVCV, ORMV, PVX, CMV, TuMV  | Whitham et al. (2003)  |
| At1g22930 | T-Complex Protein 11                                                               | 2.26  | 1.66 ; 48; CMV-Y                         | Ishihara et al. (2004) |
| At3g62770 | Transport Protein-Related                                                          | 2.62  | 2.67 ; 48; CMV-Y                         | Ishihara et al. (2004) |
| At5g24380 | Transporter, Putative                                                              | 1.28  | 1.25 ; 48; CMV-Y                         | Ishihara et al. (2004) |
| At5g38530 | Tryptophan Synthase-Related                                                        | 5.85  | 3.06 ; 48; CMV-Y                         | Ishihara et al. (2004) |
| At1g20010 | Tubulin Beta-5 Chain (Tub5)                                                        | 1.94  | 1.29 ; 24; CMV-Y                         | Ishihara et al. (2004) |
| At1g24100 | Udp-Glucuronosyl/Udp-Glucosyl Transferase Family Protein                           | 2.38  | 1.5 ; 48; CMV-Y                          | Ishihara et al. (2004) |
| At2g38850 | Unknown Protein                                                                    | 1.59  | 2.5-6.5 ; 2 ; TVCV, ORMV, PVX, CMV, TuMV | Whitham et al. (2003)  |
| At3g18890 | UV-B regulated protein 1                                                           | 4.40  | 1.06 ; 24; CMV-Y                         | Ishihara et al. (2004) |
| At1g21380 | Vhs Domain-Containing Protein / Gat Domain-Containing Protein                      | 1.41  | 0.74 ; 3, 5 and 18; CMV-Y                | Marathe et al. (2004)  |
| At1g32230 | Wwe Domain-Containing Protein / Ceo Protein, Putative (Ceo)                        | 2.55  | 1.67 ; 48; CMV-Y                         | Ishihara et al. (2004) |
| At1g68520 | Zinc Finger (B-Box Type) Family Protein                                            | 3.20  | 2.16 ; 6; CMV-Y                          | Ishihara et al. (2004) |
| At4g34100 | Zinc Finger (C3Hc4-Type Ring Finger) Family Protein                                | 3.70  | 3.09 ; 48; CMV-Y                         | Ishihara et al. (2004) |
| At2g25900 | Zinc Finger (Cch-Type) Family Protein                                              | 3.78  | 1.36 ; 3, 5 and 18; CMV-Y                | Marathe et al. (2004)  |
| At4g37910 | Heat Shock Protein 70, Mitochondrial, Putative / Hsp70, Mitochondrial, Putative    | 3.64  | 1.16 ; 10; ORMV / 1.07; ; 10; TuMV       | Yang et al. (2007)     |
| At2g47800 | Glutathione-Conjugate Transporter (Mrp4)                                           | 8.79  | 1.48;10; ORMV /1.19; 10; TuMV            | Yang et al. (2007)     |
| At1g23800 | Aldehyde Dehydrogenase, Mitochondrial (Aldh3)                                      | 11.08 | 1.79;10; ORMV /1.92; 10; TuMV            | Yang et al. (2007)     |
| At5g09590 | Heat Shock Protein 70 / Hsp70 (Hsc70-5)                                            | 6.67  | 1.98;10; ORMV /1.59; 10; TuMV            | Yang et al. (2007)     |
| At3g13380 | Leucine-Rich Repeat Family Protein                                                 | 5.09  | 1.99;10; ORMV /1.63; 10; TuMV            | Yang et al. (2007)     |
| At1g09210 | Calreticulin 2 (Crt2)                                                              | 2.71  | 2.14;10; ORMV /1.43; 10; TuMV            | Yang et al. (2007)     |
| At1g30700 | Fad-Binding Domain-Containing Protein                                              | 4.36  | 4.97;10; ORMV /3.43; 10; TuMV            | Yang et al. (2007)     |
| At5g59990 | Expressed protein                                                                  | 2.97  | 0.742; 3, 5 and 18; CMV-Y                | Marathe et al. (2004)  |

**Group B. Genes induced during PPV infection but repressed by infections of other positive sense RNA viruses**

|           |                                                                                 |      |       |                                    |                        |
|-----------|---------------------------------------------------------------------------------|------|-------|------------------------------------|------------------------|
| At1g62380 | 1-Aminocyclopropane-1-Carboxylate Oxidase, Putative / Acc Oxidase, Putative     | 2.62 |       | -2.23 ; 12; CMV-Y                  | Ishihara et al. (2004) |
| At3g53460 | 29 Kda Ribonucleoprotein, Chloroplast / Rna-Binding Protein Cp 29               | 2.21 | -2.86 | -1.5 ; 12; CMV-Y                   | Ishihara et al. (2004) |
| At1g18450 | Actin-Related Protein 4 (Arp4)                                                  | 1.50 |       | -2.01 ; 6; CMV-Y                   | Ishihara et al. (2004) |
| At5g64960 | Cyclin-Dependent Kinase, Putative / Cdk, Putative                               | 2.04 |       | -2.32 ; 12; CMV-Y                  | Ishihara et al. (2004) |
| At5g25610 | Dehydration-Responsive Protein (Rd22)                                           | 1.51 |       | -2.43 ; 24; CMV-Y                  | Ishihara et al. (2004) |
| At4g10060 | Expressed Protein                                                               | 2.17 |       | -2.1 ; 14; TMV                     | Ishihara et al. (2004) |
| At2g21330 | Fructose-Bisphosphate Aldolase, Putative                                        | 2.69 |       | -4.98 ; 48; CMV-Y                  | Ishihara et al. (2004) |
| At5g35630 | Glutamine Synthetase (Gs2)                                                      | 1.37 |       | -2.54 ; 48; CMV-Y                  | Ishihara et al. (2004) |
| At1g42970 | Glyceraldehyde-3-Phosphate Dehydrogenase                                        | 2.10 |       | -1.32 ; 48; CMV-Y                  | Ishihara et al. (2004) |
| At5g65310 | Homeobox-Leucine Zipper Protein 5 (Hb-5)                                        | 1.78 |       | -7.23 ; 48; CMV-Y                  | Ishihara et al. (2004) |
| At1g11840 | Lactoylglutathione Lyase, Putative / Glyoxalase I, Putative                     | 2.62 |       | -1.66 ; 6; CMV-Y                   | Ishihara et al. (2004) |
| At5g47210 | Nuclear Rna-Binding Protein, Putative                                           | 2.44 |       | -2.04 ; 12; CMV-Y                  | Ishihara et al. (2004) |
| At5g46390 | Peptidase S41 Family Protein                                                    | 1.54 |       | -1.84 ; 48; CMV-Y                  | Ishihara et al. (2004) |
| At1g21880 | Peptidoglycan-Binding Lysm Domain-Containing Protein                            | 1.93 |       | -1.59 ; 48; CMV-Y                  | Ishihara et al. (2004) |
| At3g07100 | Protein Transport Protein Sec24, Putative                                       | 4.39 |       | -1.69 ; 12; CMV-Y                  | Ishihara et al. (2004) |
| At1g15290 | Tetratricopeptide Repeat (Tpr)-Containing Protein                               | 4.20 |       | -2.13 ; 48; CMV-Y                  | Ishihara et al. (2004) |
| At2g29630 | Thiamine Biosynthesis Family Protein / Thic Family Protein                      | 2.78 |       | -2.32 ; 48; CMV-Y                  | Ishihara et al. (2004) |
| At5g01210 | Transferase Family Protein                                                      | 1.63 |       | -1.42 ; 24; CMV-Y                  | Ishihara et al. (2004) |
| At3g02660 | Trna Synthetase Class I (W And Y) Family Protein                                | 1.45 |       | -3.5 ; 12; CMV-Y                   | Ishihara et al. (2004) |
| At5g67030 | Zeaxanthin Epoxidase (Zep) (Aba1)                                               | 2.41 |       | -2.77 ; 48; CMV-Y                  | Ishihara et al. (2004) |
| At3g51950 | Zinc Finger (CCCH-Type) Family Protein                                          | 1.29 |       | -1.57 ; 12; CMV-Y                  | Ishihara et al. (2004) |
| At1g09750 | Chloroplast Nucleoid Dna-Binding Protein-Related                                | 4.53 |       | -13.12; 10; ORMV / -10.24;10; ORMV | Yang et al. (2007)     |
| At4g29020 | Glycine-Rich Protein                                                            | 3.40 |       | -9.67; 10; ORMV / -8.61; 10; ORMV  | Yang et al. (2007)     |
| At2g37640 | Expansin, Putative (Exp3)                                                       | 4.33 |       | -7.51; 10; ORMV / -4.91; 10; ORMV  | Yang et al. (2007)     |
| At2g20750 | Beta-Expansin, Putative (Expb1)                                                 | 6.08 |       | -5.69; 10; ORMV / -5.99; 10; ORMV  | Yang et al. (2007)     |
| At2g32100 | Ovate Protein-Related                                                           | 3.02 |       | -3.87; 10; ORMV / -1.94; 10; ORMV  | Yang et al. (2007)     |
| At5g01240 | Amino Acid Permease, Putative                                                   | 2.80 |       | -3.38; 10; ORMV / -2.07; 10; ORMV  | Yang et al. (2007)     |
| At2g26330 | Leucine-Rich Repeat Family Protein                                              | 4.76 |       | -2.97; 10; ORMV / -2.13; 10; ORMV  | Yang et al. (2007)     |
| At1g71695 | Peroxidase 12 (Per12) (P12) (Prxr6)                                             | 3.68 |       | -2.31; 10; ORMV / -1.49; 10; ORMV  | Yang et al. (2007)     |
| At5g03650 | 1,4-Alpha-Glucan Branching Enzyme / Starch Branching Enzyme Class Ii (Sbe2-2)   | 2.57 |       | -2.26; 10; ORMV / -1.46; 10; ORMV  | Yang et al. (2007)     |
| At1g66150 | Leucine-Rich Repeat Family Protein                                              | 3.94 |       | -1.96; 10; ORMV / -1.63; 10; ORMV  | Yang et al. (2007)     |
| At4g32330 | Expressed Protein                                                               | 4.49 |       | -1.94; 10; ORMV / -1.71; 10; ORMV  | Yang et al. (2007)     |
| At3g50650 | Scarecrow-Like Transcription Factor 7 (Scf7)                                    | 3.36 |       | -1.93; 10; ORMV / -1.18; 10; ORMV  | Yang et al. (2007)     |
| At5g15450 | Heat Shock Protein 100, Putative                                                | 5.13 |       | -1.64; 10; ORMV / -1.30; 10; ORMV  | Yang et al. (2007)     |
| At5g16820 | Heat Shock Factor Protein 3 (Hsf3)                                              | 2.60 |       | -1.54; 10; ORMV / -1.26; 10; ORMV  | Yang et al. (2007)     |
| At4g24280 | Heat Shock Protein 70, Putative / Hsp70, Putative                               | 4.68 |       | -1.42; 10; ORMV / -1.42; 10; ORMV  | Yang et al. (2007)     |
| At5g23570 | Xs Domain-Containing Protein / Xs Zinc Finger Domain-Containing Protein-Related | 3.25 |       | -1.36; 10; ORMV / -1.46; 10; ORMV  | Yang et al. (2007)     |
| At2g20610 | Aminotransferase, Putative                                                      | 4.41 |       | -1.17; 10; ORMV / -1.09; 10; ORMV  | Yang et al. (2007)     |
| At1g10290 | Dynammin-Like Protein 6 (Adl6)                                                  | 2.69 |       | -1.16; 10; ORMV / -1.1; 10; ORMV   | Yang et al. (2007)     |
| At5g49910 | Heat Shock Protein 70 / Hsp70 (Hsc70-7)                                         | 2.63 |       | -1.06; 10; ORMV / -1.18; 10; ORMV  | Yang et al. (2007)     |
| At4g31670 | Ubiquitin Carboxyl-Terminal Hydrolase Family Protein                            | 3.94 |       | -1.02; 10; ORMV / -1.08; 10; ORMV  | Yang et al. (2007)     |

**Group C. Genes repressed during PPV infection but induced by infections of other positive sense RNA viruses**

|           |                                                         |        |  |                           |                         |
|-----------|---------------------------------------------------------|--------|--|---------------------------|-------------------------|
| At1g59860 | 17.6 Kda Class I Heat Shock Protein (Hsp17.6A-Ci)       | -2.31  |  | 0.71 ; 3, 5 and 18; CMV-Y | Marathe et al. (2004)   |
| At4g21870 | 26.5 Kda Class P-Related Heat Shock Protein (Hsp26.5-P) | -12.74 |  | 0.74 ; 3, 5 and 18; CMV-Y | Marathe et al. (2004)   |
| At1g33850 | 40S Ribosomal Protein S15, Putative                     | -1.92  |  | 0.09 ; 3, 5 and 18; CMV-Y | Marathe et al. (2004)   |
| At1g66580 | 60S Ribosomal Protein L10 (Rpl10C)                      | -1.55  |  | 1.65 ; 48; CMV-Y          | Ishihara et al. (2004)  |
| At5g27850 | 60S Ribosomal Protein L18 (Rpl18C)                      | -1.49  |  | 3.02 ; 48; CMV-Y          | Ishihara et al. (2004)  |
| At1g57660 | 60S Ribosomal Protein L21 (Rpl21E)                      | -1.95  |  | 3.62 ; 48; CMV-Y          | Ishihara et al. (2004)  |
| At1g69700 | Aba-Responsive Protein (Hva22C)                         | -2.49  |  | 1.9 ; 4; TMV              | Golem and Culver (2003) |
| At5g54720 | Ankyrin Repeat Family Protein                           | -18.14 |  | 0.74 ; 3, 5 and 18; CMV-Y | Marathe et al. (2004)   |

|           |                                                                         |        |       |                                                        |                         |
|-----------|-------------------------------------------------------------------------|--------|-------|--------------------------------------------------------|-------------------------|
| At4g03450 | Ankyrin Repeat Family Protein                                           | -2.11  |       | 5.5-13.2, 4 ; 4.0-11.5 ; 5; TVCV, ORMV, PVX, CMV, TuMV | Whitham et al. (2003)   |
| At1g64380 | Ap2 Domain-Containing Transcription Factor, Putative                    | -1.72  |       | 0.64 ; 3, 5 and 18; CMV-Y                              | Marathe et al. (2004)   |
| At4g09030 | Arabinogalactan-Protein (Agp10)                                         | -1.50  |       | 2.77 ; 6; CMV-Y                                        | Ishihara et al. (2004)  |
| At4g12790 | Atp-Binding Family Protein                                              | -2.71  |       | 1.63 ; 12; CMV-Y                                       | Ishihara et al. (2004)  |
| At3g28930 | Avrrpt2-Induced Aig2 Protein (Aig2)                                     | -2.75  |       | 4.6-7.6 ; 1; CMV-Y                                     | Ishihara et al. (2004)  |
| At4g14410 | Basic Helix-Loop-Helix (Bhlh) Family Protein                            | -2.51  |       | 1.82 ; 12; CMV-Y                                       | Ishihara et al. (2004)  |
| At3g13790 | Beta-Fructosidase (Bfruct1) / Beta-Fructofuranosidase                   | -1.67  |       | 2.1-6.0 ; 4; TVCV, ORMV, PVX, CMV, TuMV                | Whitham et al. (2003)   |
| At3g47650 | Bundle-Sheath Defective Protein 2 Family / Bsd2 Family                  | -4.86  |       | 1.16 ; 6; CMV-Y                                        | Ishihara et al. (2004)  |
| At5g39670 | Calcium-Binding Ef Hand Family Protein                                  | -4.19  |       | 3.67 ; 48; CMV-Y                                       | Ishihara et al. (2004)  |
| At1g21550 | Calcium-Binding Protein, Putative                                       | -3.09  |       | 0.63 ; 3, 5 and 18; CMV-Y                              | Marathe et al. (2004)   |
| At2g41100 | Calmodulin-2/3/5 (Cam2) (Cal1)                                          | -4.60  |       | 3.2 - 8.8 ; 5; TVCV, ORMV, PVX, CMV, TuMV              | Whitham et al. (2003)   |
| At2g43290 | Calmodulin-Like Protein (Mss3)                                          | -3.47  |       | 4.0-7.3; 5 ; TVCV, ORMV, PVX, CMV, TuMV                | Whitham et al. (2003)   |
| At3g50770 | Calmodulin-Related Protein, Putative                                    | -2.25  |       | 1.34 ; 3, 5 and 18; CMV-Y                              | Marathe et al. (2004)   |
| At2g30360 | Cbl-Interacting Protein Kinase 11 (Cipk11)                              | -3.21  |       | 0.7 ; 3, 5 and 18; CMV-Y                               | Marathe et al. (2004)   |
| At2g04690 | Cellular Repressor Of E1A-Stimulated Genes (Creg) Family                | -4.58  |       | 1.37 ; 3, 5 and 18; CMV-Y                              | Marathe et al. (2004)   |
| At4g01700 | Chitinase, Putative                                                     | -1.50  |       | 3.4-8.1 ; 4; TVCV, ORMV, PVX, CMV, TuMV                | Whitham et al. (2003)   |
| At4g10340 | Chlorophyll A-B Binding Protein Cp26, Chloroplast                       | -1.21  |       | 1.68 ; 24; CMV-Y                                       | Ishihara et al. (2004)  |
| At1g71697 | Choline Kinase, Putative                                                | -2.99  |       | 0.66 ; 3, 5 and 18; CMV-Y                              | Marathe et al. (2004)   |
| At4g16500 | Cysteine Protease Inhibitor Family Protein / Cystatin Family Protein    | -3.01  |       | 1.56 ; 48; CMV-Y                                       | Ishihara et al. (2004)  |
| At2g26500 | Cytochrome B6F Complex Subunit (Petm), Putative                         | -3.76  |       | 1.6 ; 24; CMV-Y                                        | Ishihara et al. (2004)  |
| At2g41430 | Dehydration-Induced Protein (Erd15)                                     | -1.88  |       | 1.9 ; 4; TMV                                           | Golem and Culver (2003) |
| At1g72900 | Disease Resistance Protein (Tir-Nbs Class), Putative                    | -1.14  |       | 2.66 ; 48; CMV-Y                                       | Ishihara et al. (2004)  |
| At1g68840 | DNA-Binding Protein Rav2 (Rav2)                                         | -2.16  |       | 1.34 ; 3, 5 and 18; CMV-Y                              | Marathe et al. (2004)   |
| At3g14200 | Dnaj Heat Shock N-Terminal Domain-Containing Protein                    | -3.31  | 10.29 | 0.45 ; 3, 5 and 18; CMV-Y                              | Marathe et al. (2004)   |
| At3g21840 | E3 Ubiquitin Ligase Scf Complex Subunit Skp1/Ask1 (At7), Putative       | -3.15  |       | 1.37 ; 3, 5 and 18; CMV-Y                              | Marathe et al. (2004)   |
| At3g25040 | Er Lumen Protein Retaining Receptor, Putative / Hdel Receptor, Putative | -3.18  |       | 2.72 ; 48; CMV-Y                                       | Ishihara et al. (2004)  |
| At5g47230 | Ethylene-Responsive Element-Binding Factor 5 (Erf5)                     | -3.03  |       | 1.62 ; 3, 5 and 18; CMV-Y                              | Marathe et al. (2004)   |
| At4g17490 | Ethylene-Responsive Element-Binding Protein, Putative                   | -1.98  |       | 1.58 ; 3, 5 and 18; CMV-Y                              | Marathe et al. (2004)   |
| At1g56580 | Expressed Protein                                                       | -1.42  |       | 0.59 ; 3, 5 and 18; CMV-Y                              | Marathe et al. (2004)   |
| At5g62520 | Expressed Protein                                                       | -10.18 |       | 0.75 ; 3, 5 and 18; CMV-Y                              | Marathe et al. (2004)   |
| At5g59080 | Expressed Protein                                                       | -2.43  |       | 1.41 ; 3, 5 and 18; CMV-Y                              | Marathe et al. (2004)   |
| At5g53160 | Expressed Protein                                                       | -2.97  |       | 1.39 ; 3, 5 and 18; CMV-Y                              | Marathe et al. (2004)   |
| At5g46295 | Expressed Protein                                                       | -2.36  | -3.08 | 2.16 ; 3, 5 and 18; CMV-Y                              | Marathe et al. (2004)   |
| At5g22270 | Expressed Protein                                                       | -4.95  |       | 1.42 ; 48; CMV-Y                                       | Ishihara et al. (2004)  |
| At5g12010 | Expressed Protein                                                       | -1.59  |       | 0.71 ; 3, 5 and 18; CMV-Y                              | Marathe et al. (2004)   |
| At3g60910 | Expressed Protein                                                       | -2.24  |       | 2.48 ; 24; CMV-Y                                       | Ishihara et al. (2004)  |
| At3g10930 | Expressed Protein                                                       | -2.20  |       | 1.61 ; 3, 5 and 18; CMV-Y                              | Marathe et al. (2004)   |
| At3g22240 | Expressed Protein                                                       | -1.14  |       | 3.28 ; 48; CMV-Y                                       | Ishihara et al. (2004)  |
| At3g08610 | Expressed Protein                                                       | -3.23  |       | 2.07 ; 12; CMV-Y                                       | Ishihara et al. (2004)  |
| At1g67910 | Expressed Protein                                                       | -1.90  |       | 1.39 ; 3, 5 and 18; CMV-Y                              | Marathe et al. (2004)   |
| At1g67920 | Expressed Protein                                                       | -4.97  |       | 0.69 ; 3, 5 and 18; CMV-Y                              | Marathe et al. (2004)   |
| At1g69610 | Expressed Protein                                                       | -1.95  |       | 0.75 ; 3, 5 and 18; CMV-Y                              | Marathe et al. (2004)   |
| At2g24550 | Expressed Protein                                                       | -4.71  |       | 1.9 ; 4; TMV                                           | Golem and Culver (2003) |
| At1g55480 | Expressed Protein                                                       | -1.60  |       | 1.6 ; 6; CMV-Y                                         | Ishihara et al. (2004)  |
| At2g36630 | Expressed Protein                                                       | -1.61  |       | 0.7 ; 3, 5 and 18; CMV-Y                               | Marathe et al. (2004)   |
| At2g32190 | Expressed Protein                                                       | -2.96  |       | 0.68 ; 3, 5 and 18; CMV-Y                              | Marathe et al. (2004)   |
| At2g34600 | Expressed Protein                                                       | -4.84  |       | 0.64 ; 3, 5 and 18; CMV-Y                              | Marathe et al. (2004)   |
| At2g44090 | Expressed Protein                                                       | -1.22  |       | 2.68 ; 12; CMV-Y                                       | Ishihara et al. (2004)  |
| At2g23120 | Expressed Protein                                                       | -5.62  |       | 0.71 ; 3, 5 and 18; CMV-Y                              | Marathe et al. (2004)   |
| At4g08980 | F-Box Family Protein (Fbw2)                                             | -2.03  |       | 1.59 ; 6; CMV-Y                                        | Ishihara et al. (2004)  |
| At1g77810 | Galactosyltransferase Family Protein                                    | -1.56  |       | 2.45 ; 48; CMV-Y                                       | Ishihara et al. (2004)  |
| At5g45950 | Gdsl-Motif Lipase/Hydrolase Family Protein                              | -1.95  |       | 0.56 ; 3, 5 and 18; CMV-Y                              | Marathe et al. (2004)   |

|           |                                                                             |        |        |                                          |                         |
|-----------|-----------------------------------------------------------------------------|--------|--------|------------------------------------------|-------------------------|
| At1g28480 | Glutaredoxin Family Protein                                                 | -1.38  |        | 2.3–9.0 ; 4; TVCV, ORMV, PVX, CMV, TuMV  | Whitham et al. (2003)   |
| At2g31570 | Glutathione Peroxidase, Putative                                            | -2.53  |        | 2.52 ; 12; CMV-Y                         | Ishihara et al. (2004)  |
| At1g02930 | Glutathione S-Transferase, Putative                                         | -3.47  |        | 1.38 ; 48; CMV-Y                         | Ishihara et al. (2004)  |
| At4g19880 | Glutathione S-Transferase-Related                                           | -1.44  |        | 2.56 ; 48; CMV-Y                         | Ishihara et al. (2004)  |
| At3g04640 | Glycine-Rich Protein                                                        | -1.29  |        | 3.14 ; 48; CMV-Y                         | Ishihara et al. (2004)  |
| At1g74230 | Glycine-Rich Rna-Binding Protein                                            | -1.93  |        | 1.23 ; 12; CMV-Y                         | Ishihara et al. (2004)  |
| At4g22720 | Glycoprotease M22 Family Protein                                            | -1.89  |        | 2.2– 8.8; 4 ; TVCV, ORMV, PVX, CMV, TuMV | Whitham et al. (2003)   |
| At1g70090 | Glycosyl Transferase Family 8 Protein                                       | -1.39  |        | 1.8 ; 14; TMV                            | Golem and Culver (2003) |
| At3g04720 | Hevein-Like Protein (Hel)                                                   | -4.14  |        | 1.15 ; 24; CMV-Y                         | Ishihara et al. (2004)  |
| At5g49590 | Hypothetical Protein                                                        | -19.17 |        | 0.58 ; 3, 5 and 18; CMV-Y                | Marathe et al. (2004)   |
| At2g06630 | Hypothetical Protein                                                        | -3.05  | -40.97 | 0.61 ; 3, 5 and 18; CMV-Y                | Marathe et al. (2004)   |
| At1g52240 | Kinase partner protein                                                      | -8.76  |        | 1.05 ; 24; CMV-Y                         | Ishihara et al. (2004)  |
| At4g02380 | Late Embryogenesis Abundant 3 Family Protein / Lea3 Family Protein          | -2.33  |        | 4.0–27.3 ; 5; TVCV, ORMV, PVX, CMV, TuMV | Whitham et al. (2003)   |
| At1g01470 | Late Embryogenesis Abundant Protein, Putative / Lea Protein, Putative       | -2.07  |        | 0.62 ; 3, 5 and 18; CMV-Y                | Whitham et al. (2004)   |
| At5g24210 | Lipase Class 3 Family Protein                                               | -1.17  |        | 1.87 ; 6; CMV-Y                          | Ishihara et al. (2004)  |
| At4g21830 | Methionine Sulfoxide Reductase Domain-Containing Protein                    | -3.24  |        | 0.71 ; 3, 5 and 18; CMV-Y                | Marathe et al. (2004)   |
| At4g21850 | Methionine Sulfoxide Reductase Domain-Containing Protein                    | -7.00  |        | 2.88 ; 48; CMV-Y                         | Ishihara et al. (2004)  |
| At4g04830 | Methionine Sulfoxide Reductase Domain-Containing Protein                    | -2.02  |        | 1.61 ; 3, 5 and 18; CMV-Y                | Marathe et al. (2004)   |
| At1g65820 | Microsomal Glutathione S-Transferase, Putative                              | -4.09  |        | 2.26 ; 48; CMV-Y                         | Ishihara et al. (2004)  |
| At2g22500 | Mitochondrial Substrate Carrier Family Protein                              | -1.83  |        | 6.4–21.8 ; 5; TVCV, ORMV, PVX, CMV, TuMV | Whitham et al. (2003)   |
| At1g61990 | Mitochondrial Transcription Termination Factor-Related / Mterf-Related      | -1.67  |        | 4.9–7.9 ; 5; TVCV, ORMV, PVX, CMV, TuMV  | Whitham et al. (2003)   |
| At3g09940 | Monodehydroascorbate Reductase, Putative                                    | -3.64  |        | 2.48 ; 12; CMV-Y                         | Ishihara et al. (2004)  |
| At2g37130 | Peroxidase 21 (Per21) (P21) (Pxr5)                                          | -2.11  |        | 1.09 ; 24; CMV-Y                         | Ishihara et al. (2004)  |
| At3g18160 | Peroxin-3 Family Protein                                                    | -1.64  |        | 3.71 ; 48; CMV-Y                         | Ishihara et al. (2004)  |
| At2g20260 | Photosystem I Reaction Center Subunit IV, Chloroplast, Putative             | -2.39  |        | 1.84 ; 12; CMV-Y                         | Ishihara et al. (2004)  |
| At1g30380 | Photosystem I Reaction Center Subunit PSAK, Chloroplast, Putative           | -1.71  |        | 1.41 ; 6; CMV-Y                          | Ishihara et al. (2004)  |
| At1g52230 | Photosystem I Reaction Center Subunit Vi, Chloroplast, Putative             | -2.03  |        | 1.66 ; 12; CMV-Y                         | Ishihara et al. (2004)  |
| At2g30570 | Photosystem I Reaction Center W Protein-Related                             | -1.47  |        | 2.35 ; 12; CMV-Y                         | Ishihara et al. (2004)  |
| At5g65870 | Phytosulfokines 5 (Psk5)                                                    | -4.91  |        | 0.73 ; 3, 5 and 18; CMV-Y                | Marathe et al. (2004)   |
| At1g20340 | Plastocyanin                                                                | -1.45  |        | 1.89 ; 24; CMV-Y                         | Ishihara et al. (2004)  |
| At1g10640 | Polygalacturonase, Putative / Pectinase, Putative                           | -5.53  |        | 1.56 ; 12; CMV-Y                         | Ishihara et al. (2004)  |
| At5g40670 | Pq-Loop Repeat Family Protein / Transmembrane Family Protein                | -3.09  |        | 1.69 ; 48; CMV-Y                         | Ishihara et al. (2004)  |
| At4g07390 | Pq-Loop Repeat Family Protein / Transmembrane Family Protein                | -2.32  |        | 2.7 ; 12; CMV-Y                          | Ishihara et al. (2004)  |
| At4g12480 | Protease Inhibitor/Seed Storage/Lipid Transfer Protein (Ltp) Family Protein | -6.69  |        | 1.45 ; 3, 5 and 18; CMV-Y                | Marathe et al. (2004)   |
| At4g11890 | Protein Kinase Family Protein                                               | -2.73  |        | 0.54 ; 3, 5 and 18; CMV-Y                | Marathe et al. (2004)   |
| At4g28400 | Protein Phosphatase 2C, Putative / Pp2C, Putative                           | -1.87  |        | 4.58 ; 48; CMV-Y                         | Ishihara et al. (2004)  |
| At2g16830 | Pseudogene, Hypothetical Protein                                            | -2.59  |        | 1.48 ; 3, 5 and 18; CMV-Y                | Marathe et al. (2004)   |
| At1g57990 | Purine Permease-Related                                                     | -5.96  |        | 1.8 ; 4; TMV                             | Golem and Culver (2003) |
| At1g23440 | Pyrrrolidone-Carboxylate Peptidase Family Protein                           | -1.94  |        | 1.2 ; 48; CMV-Y                          | Ishihara et al. (2004)  |
| At3g44860 | S-Adenosyl-L-Methionine:Carboxyl Methyltransferase Family Protein           | -1.72  |        | 0.56 ; 3, 5 and 18; CMV-Y                | Marathe et al. (2004)   |
| At5g45890 | Senescence-Specific Sag12 Protein (Sag12) / Cysteine Proteinase, Putative   | -1.95  |        | 0.6 ; 3, 5 and 18; CMV-Y                 | Marathe et al. (2004)   |
| At4g21390 | S-Locus Lectin Protein Kinase Family Protein                                | -2.02  |        | 0.67 ; 3, 5 and 18; CMV-Y                | Marathe et al. (2004)   |
| At5g49480 | Sodium-Inducible Calcium-Binding Protein (Acp1)                             | -5.44  |        | 0.62 ; 3, 5 and 18; CMV-Y                | Marathe et al. (2004)   |
| At4g34190 | Stress Enhanced Protein 1 (Sep1)                                            | -1.56  |        | 1.64 ; 6; CMV-Y                          | Ishihara et al. (2004)  |
| At3g16050 | Stress-Responsive Protein, Putative                                         | -1.68  |        | 3.0–4.4 ; 5; TVCV, ORMV, PVX, CMV, TuMV  | Whitham et al. (2003)   |
| At3g27380 | Succinate Dehydrogenase, Iron-Sulphur Subunit, Mitochondrial (Sdh2-1)       | -2.10  |        | 1.45 ; 48; CMV-Y                         | Ishihara et al. (2004)  |
| At4g32150 | Synaptobrevin Family Protein                                                | -1.52  |        | 1.42 ; 12; CMV-Y                         | Ishihara et al. (2004)  |
| At3g52400 | Syntaxin, Putative (Syp122)                                                 | -2.37  |        | 2.59 ; 12; CMV-Y                         | Ishihara et al. (2004)  |
| At1g19050 | Two-Component Responsive Regulator / Response Regulator 7 (Arr7)            | -2.32  |        | 3.5–7.5 ; 1; TVCV, ORMV, PVX, CMV, TuMV  | Whitham et al. (2003)   |
| At1g22400 | Udp-Glucuronosyl/Udp-Glucosyl Transferase Family Protein                    | -2.24  |        | 1.75 ; 48; CMV-Y                         | Ishihara et al. (2004)  |
| At3g17610 | Unknown Protein                                                             | -4.67  |        | 1.32 ; 24; CMV-Y                         | Ishihara et al. (2004)  |
| At1g78410 | Vq Motif-Containing Protein                                                 | -4.02  |        | 1.72 ; 3, 5 and 18; CMV-Y                | Marathe et al. (2004)   |

|           |                                                     |       |                                 |                         |
|-----------|-----------------------------------------------------|-------|---------------------------------|-------------------------|
| At5g57530 | Xyloglucan:Xyloglucosyl Transferase, Putative       | -1.56 | 1.7 ; 14; TMV                   | Golem and Culver (2003) |
| At4g28270 | Zinc Finger (C3Hc4-Type Ring Finger) Family Protein | -1.91 | 1.54 ; 3, 5 and 18; CMV-Y       | Marathe et al. (2004)   |
| At2g14560 | Expressed protein                                   | -5.9  | 2.24; 10; ORMV / 1.76; 10; TuMV | Yang et al. (2007)      |
| At2g42360 | Zinc finger; C3HC4-type RING finger family protein  | -2.7  | 2.4; 10; ORMV / 2.05; 10; TuMV  | Yang et al. (2007)      |
| At4g23150 | Protein kinase family Protein                       | -2.9  | 3.05; 10; ORMV / 2.48; 10; TuMV | Yang et al. (2007)      |
| At3g48360 | Speckle-Type Poz Protein-Related                    | -4.2  | 1.49 ;3, 5 and 18; CMV-Y        | Marathe et al. (2004)   |
| At5g58700 | Phospholipase C                                     | -5.3  | 0.74; ;3, 5 and 18; CMV-Y       | Marathe et al. (2004)   |

**Group D. Genes repressed by infections of PPV and other positive sense RNA viruses**

|           |                                     |       |                                    |                         |
|-----------|-------------------------------------|-------|------------------------------------|-------------------------|
| At1g67050 | Expressed Protein                   | -1.84 | -2.48 ; 24; CMV-Y                  | Ishihara et al. (2004)  |
| At5g02160 | Expressed Protein                   | -3.67 | -1.9 14; TMV                       | Golem and Culver (2003) |
| At5g38980 | Expressed Protein                   | -1.91 | -2.1 14; TMV                       | Golem and Culver (2003) |
| At5g17650 | Glycine/Proline-Rich Protein        | -1.64 | -2.65 ; 12; CMV-Y                  | Ishihara et al. (2004)  |
| At4g25490 | DRE-binding protein; DREB1B         | -3.9  | -3.9 ; 10; ORMV / -1.09; 10; TuMV  | Yang et al. (2007)      |
| At5g65730 | Xyloglucan endotransglycosylase     | -2.6  | -1.8; 10; ORMV / -1.15 ; 10; TuMV  | Yang et al. (2007)      |
| At3g52590 | Ubiquitin extension protein 1; UBQ1 | -3.0  | -1.71; 10; ORMV / -1.04 ; 10; TuMV | Yang et al. (2007)      |

**Group E. Genes induced during PPV infection but either induced or suppressed by infections of other positive sense RNA viruses**

|           |                                                                                |      |                                                                                                                      |                                                                       |
|-----------|--------------------------------------------------------------------------------|------|----------------------------------------------------------------------------------------------------------------------|-----------------------------------------------------------------------|
| At4g39950 | Cytochrome P450 79B2, Putative (Cyp79B2)                                       | 2.69 | 1 ; 48; CMV-Y<br>1.9-3.9, 4 ; 5.1-8.1 ; 5 ; TVCV, ORMV, PVX, CMV, TuMV<br>1.77;10; ORMV /1.39; 10; TuMV              | Ishihara et al. (2004)<br>Whitham et al. (2003)<br>Yang et al. (2007) |
| At5g19120 | Expressed Protein                                                              | 2.65 | 2.1 ; 14; TMV<br>-1.61 ; 6; CMV-Y                                                                                    | Golem and Culver (2003)<br>Ishihara et al. (2004)                     |
| At1g19180 | Expressed Protein                                                              | 1.89 | 3.51 ; 24; CMV-Y<br>0.74 ; 3, 5 and 18; CMV-Y                                                                        | Ishihara et al. (2004)<br>Marathe et al. (2004)                       |
| At1g13090 | Cytochrome P450 71B28, Putative (Cyp71B28)                                     | 2.59 | 1.4 ; 12; CMV-Y<br>7.8-38.9 ; 5 ; TVCV, ORMV, PVX, CMV, TuMV<br>-1.19; 10; ORMV / -1.13; 10; ORMV                    | Ishihara et al. (2004)<br>Whitham et al. (2003)<br>Yang et al. (2007) |
| At4g34390 | Extra-Large Guanine Nucleotide Binding Protein, Putative / G-Protein, Putative | 2.79 | 2.76 ; 48; CMV-Y<br>3.0 - 15.3 ; 5; TVCV, ORMV, PVX, CMV, TuMV<br>1.41;10; ORMV /1.17; 10; TuMV                      | Ishihara et al. (2004)<br>Whitham et al. (2003)<br>Yang et al. (2007) |
| At5g02490 | Heat Shock Cognate 70 Kda Protein 2 (Hsc70-2) (Hsp70-2)                        | 1.81 | 1.56 ; 12; CMV-Y<br>8.9-88.4, 4 ; 5.3-98.3 ; 5; TVCV, ORMV, PVX, CMV, TuMV                                           | Ishihara et al. (2004)<br>Whitham et al. (2003)                       |
| At3g12580 | Heat Shock Protein 70, Putative / Hsp70, Putative                              | 5.24 | 2.7-11.7, 2 ; 1.9-5.6 ; 5 ; TVCV, ORMV, PVX, CMV, TuMV<br>0.55 ; 3, 5 and 18; CMV-Y<br>4.42;10; ORMV /3.19; 10; TuMV | Whitham et al. (2003)<br>Marathe et al. (2004)<br>Yang et al. (2007)  |
| At4g16660 | Heat Shock Protein 70, Putative / Hsp70, Putative                              | 3.08 | 4.27 ; 48; CMV-Y<br>4.7-24.3 ; 5 ; TVCV, ORMV, PVX, CMV, TuMV<br>2.2;10; ORMV /1.34; 10; TuMV                        | Ishihara et al. (2004)<br>Whitham et al. (2003)<br>Yang et al. (2007) |
| At5g52640 | Heat Shock Protein 81-1 (Hsp81-1) / Heat Shock Protein 83 (Hsp83)              | 6.36 | 2.4-6.2 ; 5 ; TVCV, ORMV, PVX, CMV, TuMV<br>0.66 ; 3, 5 and 18; CMV-Y                                                | Whitham et al. (2003)<br>Marathe et al. (2004)                        |
| At1g80440 | Kelch Repeat-Containing F-Box Family Protein                                   | 2.16 | 1.7 ; 4 ; TMV<br>1.38 ; 3, 5 and 18; CMV-Y                                                                           | Golem and Culver (2003)<br>Marathe et al. (2004)                      |
| At1g62510 | Lipid Transfer Protein (Ltp) Family Protein                                    | 2.76 | -2.02; 10; ORMV<br>1.41; 10; TuMV                                                                                    | Yang et al (2007)                                                     |
| At1g62570 | Flavin-Containing Monooxygenase Family Protein / Fmo Family Protein            | 3.57 | -1.20; 10; ORMV<br>1.12; 10; TuMV                                                                                    | Yang et al (2007)                                                     |
| At5g02500 | Heat Shock Cognate 70 Kda Protein 1 (Hsc70-1) (Hsp70-1)                        | 4.56 | -1.08; 10; ORMV<br>1.01; 10; TuMV                                                                                    | Yang et al (2007)                                                     |
| At5g50920 | Atp-Dependent Clp Protease Atp-Binding Subunit / Clpc                          | 4.21 | -1.03; 10; ORMV<br>1.01; 10; TuMV                                                                                    | Yang et al (2007)                                                     |
| At1g78900 | Vacuolar Atp Synthase Catalytic Subunit A / V-Atpase A Subunit                 | 4.07 | 1.01; 10; ORMV                                                                                                       | Yang et al (2007)                                                     |



|                                                                          |       |                                                                               |                                              |
|--------------------------------------------------------------------------|-------|-------------------------------------------------------------------------------|----------------------------------------------|
| AT5G51070 Atp-Dependent Clp Protease Atp-Binding Subunit (Clpd), (Erd1)  | 2.91  | -1.17; 10; TuMV<br>4.54 ; 48 ; CMV-Y<br>1.05; 10; ORMV                        | Ishihara et al. (2004)<br>Yang et al (2007)  |
| At5g53950 No Apical Meristem (Nam) Family Protein                        | 7.92  | 1.05; 10; TuMV<br>1.09; 10; ORMV<br>-1.15; 10; TuMV                           | Yang et al (2007)                            |
| At1g64780 Ammonium Transporter 1, Member 2 (Amt1.2)                      | 2.85  | 8.95; 10; ORMV<br>-1.60; 10; TuMV                                             | Yang et al (2007)                            |
| At4g19390 Expressed Protein                                              | 3.15  | 2.9–5.24; CMV-Y<br>-1.03; 10; ORMV /-1.28; 10; ORMV                           | Ishihara et al. (2004)<br>Yang et al. (2007) |
| At3g46780 Expressed Protein                                              | 5.80  | 1.61 ; 12; CMV-Y<br>-1.34; 10; ORMV / -1.29; 10; ORMV                         | Ishihara et al. (2004)<br>Yang et al. (2007) |
| At1g24280 Glucose-6-Phosphate 1-Dehydrogenase, Putative / G6Pd, Putative | 2.52  | 5.7–11.5; 5 ; TVCV, ORMV, PVX, CMV, TuMV<br>-1.49; 10; ORMV / -1.97; 10; ORMV | Whitham et al. (2003)<br>Yang et al. (2007)  |
| At4g38770 Proline-Rich Family Protein (Prp4)                             | 3.60  | 1.37 ; 6; CMV-Y<br>-1.83; 10; ORMV /-1.22; 10; ORMV                           | Ishihara et al. (2004)<br>Yang et al. (2007) |
| At4g24190 Shepherd Protein (Shd) / Clavata Formation Protein, Putative   | 5.51  | 3.49 ; 48; CMV-Y<br>1.14; 10; ORMV / 1.12; 10; TuMV                           | Ishihara et al. (2004)<br>Yang et al. (2007) |
| At3g09440 Heat Shock Cognate 70 Kda Protein 3 (Hsc70-3) (Hsp70-3)        | 3.18  | 0.49 ; 3, 5 and 18; CMV-Y<br>1.52;10; ORMV /1.49; 10; TuMV                    | Marathe et al. (2004)<br>Yang et al. (2007)  |
| At1g17020 Oxidoreductase, 2Og-Fe(Ii) Oxygenase Family Protein            | 12.32 | 3.1–16.6 ; 5 ; TVCV, ORMV, PVX, CMV, TuMV<br>2.49;10; ORMV /2.27; 10; TuMV    | Whitham et al. (2003)<br>Yang et al. (2007)  |

**Group F. Genes repressed during PPV infection but induced during infections of more than one positive sense RNA virus**

|                                                              |        |                                                                                                |                                                                       |
|--------------------------------------------------------------|--------|------------------------------------------------------------------------------------------------|-----------------------------------------------------------------------|
| At2g32680 Disease Resistance Family Protein                  | -2.56  | 2.95 ; 48; CMV-Y<br>23-177, 2 ; 39.8-172.4, 4 ; 13.5–80.3 ; 5; TVCV, ORMV, PVX, CMV, TuMV      | Ishihara et al. (2004)<br>Whitham et al. (2003)<br>Yang et al. (2007) |
| At5g61600 Ethylene-Responsive Element-Binding Family Protein | -2.20  | 1.5 ; 4; TMV<br>1.59 ; 3, 5 and 18; CMV-Y                                                      | Golem and Culver (2003)<br>Marathe et al. (2004)                      |
| At3g57260 Glycosyl Hydrolase Family 17 Protein               | -3.65  | 10.16 ; 48; CMV-Y<br>3.3- 49.5,2 ; 68.6-510.3, 4 ; 13.5–83.2 ; 5 ; TVCV, ORMV, PVX, CMV, TuMV  | Ishihara et al. (2004)<br>Whitham et al. (2003)<br>Yang et al. (2007) |
| At5g20230 Plastocyanin-Like Domain-Containing Protein        | -2.62  | 1.72; 10; ORMV / 1.52; 10; TuMV<br>1.25 ; 48; CMV-Y<br>2.6–5.9 ; 5; TVCV, ORMV, PVX, CMV, TuMV | Ishihara et al. (2004)<br>Whitham et al. (2003)<br>Yang et al. (2007) |
| At4g23140 Receptor-Like Protein Kinase 5 (Rlk5)              | -4.87  | 1.3; 10; ORMV / 1.28; 10; TuMV<br>0.65 ; 3, 5 and 18; CMV-Y<br>6.16 ; 48; CMV-Y                | Marathe et al. (2004)<br>Ishihara et al. (2004)<br>Yang et al. (2007) |
| AT2G15390 Xyloglucan Fucosyltransferase, Putative (Fut4)     | -2.75  | -1.51; 10; ORMV / -1.02 ; 10; TuMV<br>5.7–23.1 ; 5 ; TVCV, ORMV, PVX, CMV, TuMV                | Whitham et al. (2003)<br>Yang et al. (2007)                           |
| AT1G23710 Expressed Protein                                  | -4.40  | -1.3; 10; ORMV / -1.02 ; 10; TuMV<br>2.1–5.1 ; 5 ; TVCV, ORMV, PVX, CMV, TuMV                  | Whitham et al. (2003)<br>Yang et al. (2007)                           |
| AT2G30590 Wrky Family Transcription Factor                   | -2.76  | -1.17; 10; ORMV / -1.15 ; 10; TuMV<br>2.7–5.6 ; 5; TVCV, ORMV, PVX, CMV, TuMV                  | Whitham et al. (2003)<br>Yang et al. (2007)                           |
| AT2G41110 Calmodulin-2/3/5 (Cam2) (Cal1)                     | -4.60  | -1.08; 10; ORMV / -1.10 ; 10; TuMV<br>2.4–3.8; 5 ; TVCV, ORMV, PVX, CMV, TuMV                  | Whitham et al. (2003)<br>Yang et al. (2007)                           |
| At4g10040 Cytochrome C, Putative                             | -3.27  | 2.5–4.0 ; 4; TVCV, ORMV, PVX, CMV, TuMV<br>1.2; 10; ORMV / 1.1; 10; TuMV                       | Whitham et al. (2003)<br>Yang et al. (2007)                           |
| At5g59820 Zinc Finger (C2H2 Type) Family Protein (Zat12)     | -3.27  | 4.0–11.5 ; 5; TVCV, ORMV, PVX, CMV, TuMV<br>1.21; 10; ORMV / 1.17; 10; TuMV                    | Whitham et al. (2003)<br>Yang et al. (2007)                           |
| At1g45145 Thioredoxin H-Type 5 (Trx-H-5) (Toul)              | -11.53 | 2.7–3.4 ; 5 ; TVCV, ORMV, PVX, CMV, TuMV<br>1.32; 10; ORMV / / 1.18; 10; TuMV                  | Whitham et al. (2003)<br>Yang et al. (2007)                           |
| At3g54420 Class IV Chitinase                                 | -4.50  | 3.6-8.4; 4 ; 2.2–5.2 ; 5 ; TVCV, ORMV, PVX, CMV, TuMV                                          | Whitham et al. (2003)                                                 |

|           |                                                |       |      |                                                                                                               |                                             |
|-----------|------------------------------------------------|-------|------|---------------------------------------------------------------------------------------------------------------|---------------------------------------------|
| At1g75040 | Pathogenesis-Related Protein 5 (Pr-5)          | -7.74 |      | 1.58; 10; ORMV / / 1.33; 10; TuMV<br>5.4-76.5, 2 ; 12.8-156.4, 4 ; 15.4-117.5, 5 ; TVCV, ORMV, PVX, CMV, TuMV | Yang et al. (2007)<br>Whitham et al. (2003) |
| At1g65500 | Expressed Protein                              | -4.64 |      | 2.15; 10; ORMV / 1.94; 10; TuMV<br>2.1-7.0 ; 5; TVCV, ORMV, PVX, CMV, TuMV                                    | Yang et al. (2007)<br>Whitham et al. (2003) |
| At4g39670 | Expressed Protein                              | -5.55 |      | 2.74; 10; ORMV / 1.69; 10; TuMV<br>3.7-29.6 ; 2; TVCV, ORMV, PVX, CMV, TuMV                                   | Yang et al. (2007)<br>Whitham et al. (2003) |
| At2g29460 | Glutathione S-Transferase, Putative            | -3.56 |      | 3.01; 10; ORMV / / 2.40; 10; TuMV<br>7.0-23.3 ; 5; TVCV, ORMV, PVX, CMV, TuMV                                 | Yang et al. (2007)<br>Whitham et al. (2003) |
| At2g26150 | Heat Shock Transcription Factor Family Protein | -5.00 | 3.16 | 3.19; 10; ORMV / 2.01; 10; TuMV<br>0.54 ; 3, 5 and 18; CMV-Y                                                  | Yang et al. (2007)<br>Marathe et al. (2004) |
| At2g33240 | Myosin, putative                               | -13.1 |      | 3.43; 10; ORMV / 2.63; 10; TuMV<br>-1.16; 10; ORMV                                                            | Yang et al. (2007)<br>Yang et al. (2007)    |
| At4g27280 | Calcium-binding EF hand family protein         | -4.8  |      | 1.03; 10; TuMV<br>-1.16; 10; ORMV                                                                             | Yang et al. (2007)                          |
| At2g23090 | Expressed protein                              | -4.3  |      | 1.04; 10; TuMV<br>-1.13; 10; ORMV                                                                             | Yang et al. (2007)                          |
| At2g22860 | Phytosulfokines 2 (Psk2)                       | -4.90 |      | 1.02; 10; TuMV<br>7.1-28.3 ; 4; TVCV, ORMV, PVX, CMV, TuMV                                                    | Whitham et al. (2003)<br>Yang et al. (2007) |
|           |                                                |       |      | 1.24; 10; ORMV<br>-1.09; 10; TuMV                                                                             | Yang et al. (2007)                          |

FC: Fold change.

<sup>a</sup>Fold change in PPV-infected *Arabidopsis* leaves.

<sup>b</sup>Fold change in *Arabidopsis* protoplasts transfected with a PPV infectious clone.
